# Supplementary material for: Transcriptome analysis of Bipolaris sorokiniana - Hordeum vulgare provides insights into mechanisms of host-pathogen interaction
Source: Front Microbiol. 2024 Mar 20;15:1360571. doi: 10.3389/fmicb.2024.1360571 (PMC10993733; doi:10.3389/fmicb.2024.1360571)
Supplement: Supplementary file 1 [file Table_1.XLSX]

## Sheet: RC_RI DEGs with annotation
Genes	RC.1	RC.2	RI.1	RI.2	normalised_count	normalised_count_RC	normalised_count_RI	foldChange	log2FoldChange	pval	padj	Description	Length	#Hits	e-Value	sim mean	#GO	GO IDs	GO Names	Enzyme Codes	Enzyme Names	InterPro IDs	InterPro GO IDs	InterPro GO Names	Cross-reference (KO)	KEGG-pathways
HORVU.MOREX.r3.2HG0191020.1	236.748	679.723	58164.8	57500.6	29145.5	458.235	57832.7	126.207	6.97965	0.00133469	0.0227881	importin subunit beta-1-like	1833	20	0	85.18	3	C:GO:0005737; P:GO:0006606; F:GO:0031267	C:cytoplasm; P:protein import into nucleus; F:small GTPase binding	-	-	-	-	-	K14293	Nucleocytoplasmic transport; Chemical carcinogenesis - receptor activation;
HORVU.MOREX.r3.2HG0134140.1	17.4256	36.0459	1657.75	2488.24	1049.86	26.7358	2072.99	77.5363	6.2768	7.46E-10	1.81E-07	transposase family protein	648	20	4.60E-153	88.97	3	F:GO:0003676; P:GO:0015074; F:GO:0016740	F:nucleic acid binding; P:DNA integration; F:transferase activity	EC:2	Transferases	-	-	-	-	-
HORVU.MOREX.r3.2HG0144470.1	16.2238	16.4781	300.712	428.343	190.439	16.351	364.527	22.2939	4.47858	3.85E-07	2.95E-05	predicted protein	669	20	3.35E-153	91.19	1	P:GO:0032196	P:transposition	-	-	-	-	-	-	-
HORVU.MOREX.r3.6HG0554650.1	0	2.05977	7.66145	28.877	9.64956	1.02988	18.2692	17.7391	4.14886	0.0462918	0.257066	F-box/LRR-repeat protein 14-like	1149	20	0	74.41	-	-	-	-	-	-	-	-	-	-
HORVU.MOREX.r3.4HG0398910.1	246.362	251.292	20.1113	16.0428	133.452	248.827	18.0771	0.0726492	-3.78291	1.56E-05	0.000623593	histone H2B.4-like	408	20	7.54E-64	97.58	5	C:GO:0000786; F:GO:0003677; C:GO:0005634; P:GO:0006334; F:GO:0046982	C:nucleosome; F:DNA binding; C:nucleus; P:nucleosome assembly; F:protein heterodimerization activity	-	-	-	-	-	K11252	-
HORVU.MOREX.r3.3HG0254010.1	215.717	211.126	38.3073	11.23	119.095	213.421	24.7686	0.116055	-3.10712	0.000528783	0.0109387	protein HOTHEAD-like	1755	20	0	95.08	3	F:GO:0016614; F:GO:0016829; F:GO:0050660	F:oxidoreductase activity, acting on CH-OH group of donors; F:lyase activity; F:flavin adenine dinucleotide binding	EC:1.1; EC:1; EC:4	Acting on the CH-OH group of donors; Oxidoreductases; Lyases	-	-	-	K15403	Cutin, suberine and wax biosynthesis;
HORVU.MOREX.r3.4HG0345880.1	72.7068	101.958	9.57681	6.41712	47.6648	87.3326	7.99697	0.091569	-3.449	0.00171402	0.0278222	peroxidase 43-like	993	20	0	94.57	8	F:GO:0004601; C:GO:0005576; P:GO:0006979; C:GO:0009505; F:GO:0020037; P:GO:0042744; F:GO:0046872; P:GO:0098869	F:peroxidase activity; C:extracellular region; P:response to oxidative stress; C:plant-type cell wall; F:heme binding; P:hydrogen peroxide catabolic process; F:metal ion binding; P:cellular oxidant detoxification	EC:1.11; EC:1; EC:1.11.1	Acting on a peroxide as acceptor; Oxidoreductases; Acting on a peroxide as acceptor	-	-	-	K00430	Metabolic pathways; Biosynthesis of secondary metabolites; Phenylpropanoid biosynthesis;
HORVU.MOREX.r3.7HG0725550.1	0	0	23.942	36.8984	15.2101	0	30.4202	Inf	Inf	0.000724929	0.014071	hypothetical protein D1007_50805	384	20	1.70E-72	86.81	-	-	-	-	-	-	-	-	-	-
HORVU.MOREX.r3.7HG0691770.1	0	0	22.9844	27.2728	12.5643	0	25.1286	Inf	Inf	0.00181707	0.029043	Serine/threonine-protein phosphatase 7 long form-like protein	462	20	7.70E-83	92.75	-	-	-	-	-	-	-	-	-	-
HORVU.MOREX.r3.7HG0659690.1	18.0265	10.2988	91.9374	85.0268	51.3224	14.1627	88.4821	6.24756	2.64329	0.0090873	0.0938862	thiosulfate sulfurtransferase 18-like isoform X2	549	20	9.26E-116	82.83	1	F:GO:0003824	F:catalytic activity	-	-	-	-	-	-	-
HORVU.MOREX.r3.7HG0732200.1	0	0	7.66145	17.6471	6.32713	0	12.6543	Inf	Inf	0.0301232	0.201313	hypothetical protein ZWY2020_045646	549	20	7.74E-82	94.79	-	-	-	-	-	-	-	-	-	-
HORVU.MOREX.r3.2HG0138660.1	16.8247	23.6873	150.356	152.407	85.8186	20.256	151.381	7.4734	2.90176	0.000783607	0.0149343	glucan endo-1,3-beta-glucosidase 3-like	1686	20	0	87.62	8	F:GO:0003922; F:GO:0005524; P:GO:0005975; P:GO:0006177; P:GO:0006541; F:GO:0016462; F:GO:0042973; C:GO:0046658	F:GMP synthase (glutamine-hydrolyzing) activity; F:ATP binding; P:carbohydrate metabolic process; P:GMP biosynthetic process; P:glutamine metabolic process; F:pyrophosphatase activity; F:glucan endo-1,3-beta-D-glucosidase activity; C:anchored component of plasma membrane	EC:3.2; EC:3.6.1; EC:3.2.1.21; EC:6.3; EC:6.3.5.2; EC:3.6; EC:3; EC:6; EC:6.3.5; EC:3.2.1.39; EC:3.2.1	Glycosylases; Acting on acid anhydrides; Beta-glucosidase; Forming carbon-nitrogen bonds; GMP synthase (glutamine-hydrolyzing); Acting on acid anhydrides; Hydrolases; Ligases; Forming carbon-nitrogen bonds; Glucan endo-1,3-beta-D-glucosidase; Glycosylases	-	-	-	-	-
HORVU.MOREX.r3.3HG0254660.1	0	0	58.4186	91.4439	37.4656	0	74.9313	Inf	Inf	2.90E-07	2.34E-05	hypothetical protein D1007_57762	552	20	5.05E-130	92.35	-	-	-	-	-	-	-	-	-	-
HORVU.MOREX.r3.6HG0606520.1	122.58	167.871	30.6458	27.2728	87.0924	145.226	28.9593	0.199409	-2.3262	0.00842163	0.089058	cell division cycle 20.2, cofactor of APC complex-like	903	20	0	99	5	C:GO:0005680; F:GO:0010997; P:GO:1904668; P:GO:1905786; F:GO:1990757	C:anaphase-promoting complex; F:anaphase-promoting complex binding; P:positive regulation of ubiquitin protein ligase activity; P:positive regulation of anaphase-promoting complex-dependent catabolic process; F:ubiquitin ligase activator activity	-	-	-	-	-	K03363	Ubiquitin mediated proteolysis; Cell cycle; Cell cycle - yeast; Meiosis - yeast;
HORVU.MOREX.r3.7HG0721960.1	1.20177	2.05977	21.069	28.877	13.3019	1.63077	24.973	15.3137	3.93675	0.0271552	0.190319	putative receptor protein kinase ZmPK1	2556	20	0	85	7	F:GO:0004674; F:GO:0004712; F:GO:0005524; P:GO:0006468; C:GO:0016021; P:GO:0048544; F:GO:0106310	F:protein serine/threonine kinase activity; F:protein serine/threonine/tyrosine kinase activity; F:ATP binding; P:protein phosphorylation; C:integral component of membrane; P:recognition of pollen; F:protein serine kinase activity	EC:2.7.1; EC:2.7.12.1; EC:2.7; EC:2	Transferring phosphorus-containing groups; Dual-specificity kinase; Transferring phosphorus-containing groups; Transferases	-	-	-	-	-
HORVU.MOREX.r3.1HG0092840.1	0	0	15.3229	12.8342	7.03928	0	14.0786	Inf	Inf	0.016987	0.142967	S-type anion channel SLAH2-like	1746	20	0	85.41	6	C:GO:0005886; P:GO:0006873; F:GO:0008308; P:GO:0015698; C:GO:0016021; P:GO:0034220	C:plasma membrane; P:cellular ion homeostasis; F:voltage-gated anion channel activity; P:inorganic anion transport; C:integral component of membrane; P:ion transmembrane transport	EC:7	n/a	-	-	-	-	-
HORVU.MOREX.r3.2HG0106760.1	0	0	69.9107	101.07	42.7451	0	85.4902	Inf	Inf	6.25E-08	6.56E-06	predicted protein	693	20	1.12E-135	86.78	1	P:GO:0032196	P:transposition	-	-	-	-	-	-	-
HORVU.MOREX.r3.6HG0543770.1	274.002	240.993	18.1959	16.0428	137.308	257.498	17.1194	0.0664836	-3.91086	7.35E-06	0.000336087	histone H2A.1-like	447	20	1.53E-58	100	4	C:GO:0000786; F:GO:0003677; C:GO:0005634; F:GO:0046982	C:nucleosome; F:DNA binding; C:nucleus; F:protein heterodimerization activity	-	-	-	-	-	K11251	Necroptosis;
HORVU.MOREX.r3.5HG0505720.1	0	0	5.74609	33.6899	9.85899	0	19.718	Inf	Inf	0.00846996	0.0893184	protein STRUBBELIG-RECEPTOR FAMILY 5-like	2019	20	0	93.97	4	F:GO:0004672; F:GO:0005524; P:GO:0006468; C:GO:0016021	F:protein kinase activity; F:ATP binding; P:protein phosphorylation; C:integral component of membrane	EC:2.7.1; EC:2.7; EC:2	Transferring phosphorus-containing groups; Transferring phosphorus-containing groups; Transferases	-	-	-	-	-
HORVU.MOREX.r3.1HG0012440.1	0.600883	1.02988	47.8841	68.984	29.6247	0.815383	58.434	71.6645	6.16319	4.61E-05	0.00153765	predicted protein	669	20	3.91E-153	91.95	1	P:GO:0032196	P:transposition	-	-	-	-	-	-	-
HORVU.MOREX.r3.3HG0318810.1	2.40353	10.2988	37.3496	51.3369	25.3472	6.35118	44.3433	6.98189	2.80362	0.0207065	0.161996	protein LIFEGUARD 2-like	738	20	1.51E-112	89.61	1	C:GO:0016021	C:integral component of membrane	-	-	-	-	-	-	-
HORVU.MOREX.r3.2HG0135150.1	1.20177	0	9.57681	27.2728	9.51283	0.600883	18.4248	30.6629	4.93842	0.0431399	0.247016	hypothetical protein ZWY2020_004145	690	20	9.03E-145	96.74	-	-	-	-	-	-	-	-	-	-
HORVU.MOREX.r3.5HG0483660.1	37.2547	38.1057	251.87	437.968	191.3	37.6802	344.919	9.15386	3.19438	0.000161355	0.0042783	hypothetical chloroplast RF21	270	20	2.13E-58	98.65	3	F:GO:0000166; C:GO:0009507; C:GO:0016021	F:nucleotide binding; C:chloroplast; C:integral component of membrane	-	-	-	-	-	-	-
HORVU.MOREX.r3.3HG0260700.1	3.00441	3.08965	29.6881	44.9198	20.1755	3.04703	37.304	12.2427	3.61385	0.0160191	0.138103	Peroxidase 15	255	20	3.78E-44	73.71	3	F:GO:0004518; P:GO:0006281; F:GO:0140097	F:nuclease activity; P:DNA repair; F:catalytic activity, acting on DNA	EC:3.1; EC:3	Acting on ester bonds; Hydrolases	-	-	-	-	-
HORVU.MOREX.r3.3HG0233890.1	0	0	9.57681	20.8556	7.60811	0	15.2162	Inf	Inf	0.017022	0.142973	hypothetical protein ZWY2020_032988, partial	690	20	1.16E-140	96.43	-	-	-	-	-	-	-	-	-	-
HORVU.MOREX.r3.4HG0360600.1	18.0265	4.11953	54.5878	93.0482	42.4455	11.073	73.818	6.66649	2.73693	0.0211347	0.163556	monosaccharide-sensing protein 2	720	20	7.90E-94	75.5	3	F:GO:0015293; C:GO:0016021; P:GO:0055085	F:symporter activity; C:integral component of membrane; P:transmembrane transport	EC:7	n/a	-	-	-	-	-
HORVU.MOREX.r3.6HG0633190.1	1.20177	0	55.5455	88.2354	36.2457	0.600883	71.8904	119.641	6.90257	7.39E-06	0.00033774	predicted protein	756	20	8.04E-140	73.67	3	F:GO:0003676; F:GO:0008408; P:GO:0090305	F:nucleic acid binding; F:3'-5' exonuclease activity; P:nucleic acid phosphodiester bond hydrolysis	EC:3.1; EC:3	Acting on ester bonds; Hydrolases	-	-	-	-	-
HORVU.MOREX.r3.2HG0195300.1	308.253	316.174	49.7994	73.7969	187.006	312.214	61.7981	0.197936	-2.3369	0.0022885	0.0345657	F-box/kelch-repeat protein At5g60570-like	1341	20	0	94.71	1	C:GO:0005634	C:nucleus	-	-	-	-	-	-	-
HORVU.MOREX.r3.2HG0098610.1	9.61412	14.4184	85.2336	97.8611	51.7818	12.0162	91.5473	7.61863	2.92953	0.00304484	0.042993	probably inactive receptor-like protein kinase At2g46850	2079	20	0	90.04	5	F:GO:0004672; F:GO:0005524; P:GO:0006468; P:GO:0007166; C:GO:0016021	F:protein kinase activity; F:ATP binding; P:protein phosphorylation; P:cell surface receptor signaling pathway; C:integral component of membrane	EC:2.7.1; EC:2.7; EC:2	Transferring phosphorus-containing groups; Transferring phosphorus-containing groups; Transferases	-	-	-	-	-
HORVU.MOREX.r3.7HG0687600.1	3.6053	2.05977	25.8574	38.5027	17.5063	2.83253	32.1801	11.3609	3.506	0.0309194	0.204522	beta-galactosidase 11-like isoform X1	2601	20	0	94.46	5	F:GO:0004565; C:GO:0005773; P:GO:0005975; F:GO:0030246; C:GO:0048046	F:beta-galactosidase activity; C:vacuole; P:carbohydrate metabolic process; F:carbohydrate binding; C:apoplast	EC:3.2; EC:3; EC:3.2.1.23; EC:3.2.1	Glycosylases; Hydrolases; Beta-galactosidase; Glycosylases	-	-	-	-	-
HORVU.MOREX.r3.4HG0331440.1	0	0	3.83073	19.2514	5.77052	0	11.541	Inf	Inf	0.0443506	0.251222	LOB domain-containing protein 29-like	678	20	8.80E-157	86.39	-	-	-	-	-	-	-	-	-	-
HORVU.MOREX.r3.6HG0567470.1	11.4168	9.26895	75.6568	107.487	50.9573	10.3429	91.5718	8.85362	3.14627	0.00279065	0.0403447	uncharacterized protein LOC124671670	1416	20	0	72.71	-	-	-	-	-	-	-	-	-	-
HORVU.MOREX.r3.7HG0714910.1	169.449	259.531	72.7838	32.0856	133.462	214.49	52.4347	0.244462	-2.03232	0.0213824	0.164711	enoyl-[acyl-carrier-protein] reductase [NADH] 1, chloroplastic	1119	20	0	94.7	5	F:GO:0004318; C:GO:0005739; P:GO:0006633; C:GO:0009507; F:GO:0016631	F:enoyl-[acyl-carrier-protein] reductase (NADH) activity; C:mitochondrion; P:fatty acid biosynthetic process; C:chloroplast; F:enoyl-[acyl-carrier-protein] reductase activity	EC:2.3.1.85; EC:2.3; EC:1.3; EC:1.3.1.9; EC:1; EC:2; EC:1.3.1; EC:2.3.1	Fatty-acid synthase; Acyltransferases; Acting on the CH-CH group of donors; Enoyl-[acyl-carrier-protein] reductase (NADH); Oxidoreductases; Transferases; Acting on the CH-CH group of donors; Acyltransferases	-	-	-	K00208	Metabolic pathways; Biosynthesis of secondary metabolites; Biosynthesis of cofactors; Biotin metabolism; Prodigiosin biosynthesis;
HORVU.MOREX.r3.4HG0396580.1	0	0	12.4499	14.4385	6.72209	0	13.4442	Inf	Inf	0.0213467	0.164538	ABC transporter C family member 3	906	20	2.09E-168	88.52	4	F:GO:0005524; C:GO:0016021; P:GO:0055085; F:GO:0140359	F:ATP binding; C:integral component of membrane; P:transmembrane transport; F:ABC-type transporter activity	EC:7	n/a	-	-	-	-	-
HORVU.MOREX.r3.6HG0561380.1	1.20177	0	38.3073	43.3156	20.7061	0.600883	40.8114	67.9191	6.08575	0.000725192	0.014071	predicted protein	669	20	1.23E-152	91.98	1	P:GO:0032196	P:transposition	-	-	-	-	-	-	-
HORVU.MOREX.r3.5HG0449060.1	0	0	27.7728	25.6685	13.3603	0	26.7206	Inf	Inf	0.00120438	0.0211006	hypothetical protein ZWY2020_041977, partial	885	20	0	90.15	2	P:GO:0006508; F:GO:0008234	P:proteolysis; F:cysteine-type peptidase activity	EC:3.4; EC:3	Acting on peptide bonds (peptidases); Hydrolases	-	-	-	-	-
HORVU.MOREX.r3.4HG0407840.1	0	0	11.4922	8.0214	4.87839	0	9.75679	Inf	Inf	0.0448392	0.252662	hypothetical protein ZWY2020_021451, partial	774	20	1.14E-149	94.41	-	-	-	-	-	-	-	-	-	-
HORVU.MOREX.r3.1HG0094860.1	79.9174	94.7493	559.286	452.407	296.59	87.3333	505.846	5.79213	2.53409	0.000923826	0.0169443	protein ANTAGONIST OF LIKE HETEROCHROMATIN PROTEIN 1-like	1098	20	0	92.33	4	F:GO:0004518; C:GO:0005634; F:GO:0046872; P:GO:0090305	F:nuclease activity; C:nucleus; F:metal ion binding; P:nucleic acid phosphodiester bond hydrolysis	EC:3.1; EC:3	Acting on ester bonds; Hydrolases	-	-	-	-	-
HORVU.MOREX.r3.3HG0253420.1	0	0	21.069	20.8556	10.4812	0	20.9623	Inf	Inf	0.00397811	0.0519506	putative polyprotein	525	20	3.64E-126	92.69	-	-	-	-	-	-	-	-	-	-
HORVU.MOREX.r3.5HG0530200.1	593.071	645.737	138.864	154.011	382.921	619.404	146.437	0.236416	-2.0806	0.00732751	0.0804184	actin-3	1134	20	0	99.7	3	F:GO:0005524; C:GO:0005737; C:GO:0005856	F:ATP binding; C:cytoplasm; C:cytoskeleton	-	-	-	-	-	-	-
HORVU.MOREX.r3.1HG0031220.1	0	0	4.78841	17.6471	5.60887	0	11.2177	Inf	Inf	0.0452938	0.254384	hypothetical protein ZWY2020_021451, partial	774	20	6.31E-156	96.28	-	-	-	-	-	-	-	-	-	-
HORVU.MOREX.r3.3HG0252510.1	168.848	231.724	18.1959	0	104.692	200.286	9.09797	0.0454249	-4.46037	7.75E-06	0.000349821	MFS18 protein-like	387	16	1.15E-19	83.91	-	-	-	-	-	-	-	-	-	-
HORVU.MOREX.r3.6HG0569810.1	73.3077	85.4803	339.977	600.001	274.691	79.394	469.989	5.9197	2.56552	0.00181039	0.0290126	retrotransposon protein, putative, unclassified	3852	20	0	59.26	4	F:GO:0005488; C:GO:0016020; P:GO:0090304; F:GO:0140640	F:binding; C:membrane; P:nucleic acid metabolic process; F:catalytic activity, acting on a nucleic acid	-	-	-	-	-	-	-
HORVU.MOREX.r3.7HG0751010.1	0	0	8.61913	16.0428	6.16548	0	12.331	Inf	Inf	0.0308576	0.204185	mannose/glucose-specific lectin-like	924	20	0	68.65	8	F:GO:0000166; F:GO:0004672; F:GO:0005524; P:GO:0006468; F:GO:0016301; P:GO:0016310; F:GO:0016740; F:GO:0030246	F:nucleotide binding; F:protein kinase activity; F:ATP binding; P:protein phosphorylation; F:kinase activity; P:phosphorylation; F:transferase activity; F:carbohydrate binding	-	-	-	-	-	-	-
HORVU.MOREX.r3.4HG0394960.1	1.20177	0	23.942	8.0214	8.2913	0.600883	15.9817	26.5971	4.7332	0.038301	0.231489	non-symbiotic hemoglobin	489	20	7.11E-115	94.81	5	F:GO:0005344; P:GO:0015671; F:GO:0019825; F:GO:0020037; F:GO:0046872	F:oxygen carrier activity; P:oxygen transport; F:oxygen binding; F:heme binding; F:metal ion binding	-	-	-	-	-	-	-
HORVU.MOREX.r3.2HG0170350.1	1.20177	0	45.9687	65.7755	28.2365	0.600883	55.8721	92.9834	6.5389	6.88E-05	0.00213762	Aldehyde dehydrogenase family 2 member B4, mitochondrial	540	20	2.87E-55	70.42	6	F:GO:0004497; F:GO:0005506; C:GO:0016020; C:GO:0016021; F:GO:0016705; F:GO:0020037	F:monooxygenase activity; F:iron ion binding; C:membrane; C:integral component of membrane; F:oxidoreductase activity, acting on paired donors, with incorporation or reduction of molecular oxygen; F:heme binding	-	-	-	-	-	-	-
HORVU.MOREX.r3.5HG0510420.1	3.00441	0	31.6035	35.2942	17.4755	1.50221	33.4488	22.2665	4.4768	0.0104598	0.103209	Alternative oxidase 1a, mitochondrial	1476	20	0	90.83	-	-	-	-	-	-	-	-	-	-
HORVU.MOREX.r3.4HG0351430.1	13.2194	8.23907	160.89	162.032	86.0953	10.7292	161.461	15.0487	3.91157	3.18E-05	0.00111885	retrotransposon protein, putative, unclassified	3201	20	0	63.29	6	F:GO:0003676; F:GO:0003964; F:GO:0004523; P:GO:0006278; F:GO:0046872; P:GO:0090502	F:nucleic acid binding; F:RNA-directed DNA polymerase activity; F:RNA-DNA hybrid ribonuclease activity; P:RNA-templated DNA biosynthetic process; F:metal ion binding; P:RNA phosphodiester bond hydrolysis, endonucleolytic	-	-	-	-	-	-	-
HORVU.MOREX.r3.5HG0472090.1	12.6185	8.23907	108.218	121.925	62.7502	10.4288	115.072	11.034	3.46389	0.000511402	0.0106316	retrotransposon protein, putative, unclassified	1314	20	1.10E-137	64.36	1	C:GO:0110165	C:cellular anatomical entity	-	-	-	-	-	-	-
HORVU.MOREX.r3.3HG0271430.1	0	0	15.3229	22.4599	9.4457	0	18.8914	Inf	Inf	0.00701408	0.0780278	adenylate-forming reductase 06235-like	1695	20	0	89.09	2	C:GO:0005886; C:GO:0016021	C:plasma membrane; C:integral component of membrane	-	-	-	-	-	-	-
HORVU.MOREX.r3.1HG0006880.1	2.40353	0	19.1536	24.0642	11.4053	1.20177	21.6089	17.981	4.1684	0.0439149	0.24993	putative disease resistance protein RGA4	2106	20	0	88.26	2	P:GO:0006952; F:GO:0043531	P:defense response; F:ADP binding	-	-	-	-	-	-	-
HORVU.MOREX.r3.3HG0301300.1	293.231	378.997	17.2383	19.2514	177.179	336.114	18.2448	0.0542816	-4.20339	1.24E-06	7.85E-05	glycerol-3-phosphate 2-O-acyltransferase 6	1494	20	0	97.34	6	P:GO:0009908; P:GO:0010143; C:GO:0016021; P:GO:0016311; F:GO:0016791; F:GO:0090447	P:flower development; P:cutin biosynthetic process; C:integral component of membrane; P:dephosphorylation; F:phosphatase activity; F:glycerol-3-phosphate 2-O-acyltransferase activity	EC:2.3; EC:3.1; EC:2; EC:3; EC:2.3.1; EC:3.1.3	Acyltransferases; Acting on ester bonds; Transferases; Hydrolases; Acyltransferases; Acting on ester bonds	-	-	-	K13508	Metabolic pathways; Biosynthesis of secondary metabolites; Glycerolipid metabolism; Glycerophospholipid metabolism;
HORVU.MOREX.r3.3HG0252370.1	1.20177	2.05977	55.5455	112.3	42.7767	1.63077	83.9225	51.462	5.68544	1.01E-05	0.000438794	heavy metal-associated isoprenylated plant protein 43-like	534	20	1.90E-92	93.47	1	F:GO:0046872	F:metal ion binding	-	-	-	-	-	-	-
HORVU.MOREX.r3.7HG0719430.1	0	0	24.8997	16.0428	10.2356	0	20.4713	Inf	Inf	0.00384732	0.0508261	NAC domain-containing protein 46-like	1416	20	0	67.44	3	F:GO:0003677; C:GO:0005634; P:GO:0006355	F:DNA binding; C:nucleus; P:regulation of DNA-templated transcription	-	-	-	-	-	-	-
HORVU.MOREX.r3.7HG0649690.1	0	0	7.66145	12.8342	5.12392	0	10.2478	Inf	Inf	0.0481216	0.26223	peroxidase 2-like	990	20	0	97.28	7	F:GO:0004601; C:GO:0005576; P:GO:0006979; F:GO:0020037; P:GO:0042744; F:GO:0046872; P:GO:0098869	F:peroxidase activity; C:extracellular region; P:response to oxidative stress; F:heme binding; P:hydrogen peroxide catabolic process; F:metal ion binding; P:cellular oxidant detoxification	EC:1.11; EC:1; EC:1.11.1	Acting on a peroxide as acceptor; Oxidoreductases; Acting on a peroxide as acceptor	-	-	-	K00430	Metabolic pathways; Biosynthesis of secondary metabolites; Phenylpropanoid biosynthesis;
HORVU.MOREX.r3.5HG0510670.1	0	0	8.61913	36.8984	11.3794	0	22.7588	Inf	Inf	0.00437463	0.0558459	LOW QUALITY PROTEIN: hypothetical protein CFC21_091702	468	20	3.45E-77	84.36	1	C:GO:0016021	C:integral component of membrane	-	-	-	-	-	-	-
HORVU.MOREX.r3.3HG0224600.1	14.4212	7.20919	110.133	189.305	80.2672	10.8152	149.719	13.8434	3.79113	0.000124406	0.00348155	senescence-associated protein DIN1 isoform X1	468	20	1.34E-67	81.9	2	F:GO:0005488; C:GO:0016021	F:binding; C:integral component of membrane	-	-	-	-	-	-	-
HORVU.MOREX.r3.3HG0283550.1	0	0	16.2806	11.23	6.87763	0	13.7553	Inf	Inf	0.0174348	0.145214	Protease 2	270	20	4.64E-56	91.25	-	-	-	-	-	-	-	-	-	-
HORVU.MOREX.r3.2HG0198190.1	0	0	13.4075	12.8342	6.56044	0	13.1209	Inf	Inf	0.0219018	0.166802	hypothetical protein ZWY2020_006035	546	20	1.28E-98	80.36	-	-	-	-	-	-	-	-	-	-
HORVU.MOREX.r3.1HG0006820.1	0	0	9.57681	12.8342	5.60276	0	11.2055	Inf	Inf	0.0369057	0.226003	LRR receptor kinase SERK2-like isoform X1	387	19	3.75E-43	72.59	4	F:GO:0004674; F:GO:0005524; P:GO:0006468; C:GO:0016021	F:protein serine/threonine kinase activity; F:ATP binding; P:protein phosphorylation; C:integral component of membrane	EC:2.7.1; EC:2.7; EC:2	Transferring phosphorus-containing groups; Transferring phosphorus-containing groups; Transferases	-	-	-	-	-
HORVU.MOREX.r3.5HG0501820.1	0	0	9.57681	17.6471	6.80597	0	13.6119	Inf	Inf	0.0231102	0.173016	probable kinase CHARK	1260	20	0	75.71	6	F:GO:0000166; P:GO:0002229; F:GO:0004675; C:GO:0005886; P:GO:0016310; P:GO:0042742	F:nucleotide binding; P:defense response to oomycetes; F:transmembrane receptor protein serine/threonine kinase activity; C:plasma membrane; P:phosphorylation; P:defense response to bacterium	EC:2.7.1; EC:2.7; EC:2; EC:2.7.11.30	Transferring phosphorus-containing groups; Transferring phosphorus-containing groups; Transferases; Receptor protein serine/threonine kinase	-	-	-	-	-
HORVU.MOREX.r3.5HG0531010.1	1.20177	0	18.1959	12.8342	8.05799	0.600883	15.5151	25.8205	4.69045	0.0492666	0.266031	glutathione S-transferase 4-like	669	20	5.15E-162	92.83	5	F:GO:0004364; C:GO:0005737; P:GO:0006749; P:GO:0009636; F:GO:0043295	F:glutathione transferase activity; C:cytoplasm; P:glutathione metabolic process; P:response to toxic substance; F:glutathione binding	EC:2.5.1; EC:2.5.1.18; EC:2	Transferring alkyl or aryl groups, other than methyl groups; Glutathione transferase; Transferases	-	-	-	K00799	Metabolic pathways; Metabolism of xenobiotics by cytochrome P450; Drug metabolism - cytochrome P450; Drug metabolism - other enzymes; Chemical carcinogenesis - DNA adducts; Chemical carcinogenesis - receptor activation; Chemical carcinogenesis - reactive oxygen species;
HORVU.MOREX.r3.3HG0247750.1	0	2.05977	24.8997	20.8556	11.9538	1.02988	22.8777	22.2138	4.47339	0.0135733	0.124007	indole-3-pyruvate monooxygenase YUCCA4-like	1332	20	0	87.26	6	F:GO:0004499; P:GO:0009851; P:GO:0009901; F:GO:0050660; F:GO:0050661; F:GO:0103075	F:N,N-dimethylaniline monooxygenase activity; P:auxin biosynthetic process; P:anther dehiscence; F:flavin adenine dinucleotide binding; F:NADP binding; F:indole-3-pyruvate monooxygenase activity	EC:1; EC:1.14.13.8; EC:1.14; EC:1.14.13; EC:1.14.13.168	Oxidoreductases; Flavin-containing monooxygenase; Acting on paired donors, with incorporation or reduction of molecular oxygen. The oxygen incorporated need not be derived from O(2); Acting on paired donors, with incorporation or reduction of molecular oxygen. The oxygen incorporated need not be derived from O(2); Indole-3-pyruvate monooxygenase	-	-	-	K11816	Metabolic pathways; Tryptophan metabolism;
HORVU.MOREX.r3.5HG0531860.1	0.600883	0	31.6035	59.3583	22.8907	0.300441	45.4809	151.38	7.24203	0.000172098	0.00449646	uncharacterized protein LOC123397385	1308	20	0	87.94	-	-	-	-	-	-	-	-	-	-
HORVU.MOREX.r3.5HG0506090.1	2.40353	0	11.4922	36.8984	12.6985	1.20177	24.1953	20.1331	4.3315	0.0402913	0.238313	MAP7 domain-containing protein 1-like	480	20	9.24E-61	87.09	-	-	-	-	-	-	-	-	-	-
HORVU.MOREX.r3.3HG0262510.1	0	0	12.4499	19.2514	7.9253	0	15.8506	Inf	Inf	0.0135815	0.124007	putative calcium-binding protein CML16	708	20	1.23E-140	93.82	-	-	-	-	-	-	-	-	-	-
HORVU.MOREX.r3.2HG0106730.1	2.40353	2.05977	25.8574	48.1284	19.6123	2.23165	36.9929	16.5765	4.05107	0.0107031	0.105022	Acyl-(acyl-carrier-protein) desaturase, chloroplastic	1557	20	0	69.97	-	-	-	-	-	-	-	-	-	-
HORVU.MOREX.r3.7HG0702830.1	28.2415	31.9264	114.922	147.594	80.6708	30.0839	131.258	4.36305	2.12534	0.0155873	0.135658	protein LOL4-like	399	20	1.40E-92	87.64	1	C:GO:0005634	C:nucleus	-	-	-	-	-	-	-
HORVU.MOREX.r3.5HG0509200.1	776.941	939.254	73.7415	107.487	474.356	858.097	90.6141	0.105599	-3.24333	6.44E-05	0.00202225	putative linoleate 9S-lipoxygenase 3	2595	20	0	96.46	4	P:GO:0006633; F:GO:0016702; P:GO:0031408; F:GO:0046872	P:fatty acid biosynthetic process; F:oxidoreductase activity, acting on single donors with incorporation of molecular oxygen, incorporation of two atoms of oxygen; P:oxylipin biosynthetic process; F:metal ion binding	EC:1.13.11; EC:1.13; EC:1	Acting on single donors with incorporation of molecular oxygen (oxygenases). The oxygen incorporated need not be derived from O(2); Acting on single donors with incorporation of molecular oxygen (oxygenases). The oxygen incorporated need not be derived from O(2); Oxidoreductases	-	-	-	K15718	-
HORVU.MOREX.r3.5HG0530450.1	2175.8	2262.65	475.968	415.508	1332.48	2219.22	445.738	0.200853	-2.31579	0.0101045	0.100955	probable cellulose synthase A catalytic subunit 3 [UDP-forming]	3276	20	0	99.14	7	C:GO:0005886; C:GO:0016021; F:GO:0016760; P:GO:0030244; F:GO:0046872; P:GO:0071555; P:GO:0071669	C:plasma membrane; C:integral component of membrane; F:cellulose synthase (UDP-forming) activity; P:cellulose biosynthetic process; F:metal ion binding; P:cell wall organization; P:plant-type cell wall organization or biogenesis	EC:2.4.1.12; EC:2.4; EC:2; EC:2.4.1	Cellulose synthase (UDP-forming); Glycosyltransferases; Transferases; Glycosyltransferases	-	-	-	-	-
HORVU.MOREX.r3.5HG0530450.2	2077.25	2226.61	505.656	394.653	1301.04	2151.93	450.154	0.209186	-2.25714	0.0126232	0.117796	probable cellulose synthase A catalytic subunit 3 [UDP-forming]	3276	20	0	99.14	7	C:GO:0005886; C:GO:0016021; F:GO:0016760; P:GO:0030244; F:GO:0046872; P:GO:0071555; P:GO:0071669	C:plasma membrane; C:integral component of membrane; F:cellulose synthase (UDP-forming) activity; P:cellulose biosynthetic process; F:metal ion binding; P:cell wall organization; P:plant-type cell wall organization or biogenesis	EC:2.4.1.12; EC:2.4; EC:2; EC:2.4.1	Cellulose synthase (UDP-forming); Glycosyltransferases; Transferases; Glycosyltransferases	-	-	-	-	-
HORVU.MOREX.r3.4HG0416570.1	430.232	484.045	65.1223	99.4653	269.716	457.139	82.2938	0.180019	-2.47378	0.00124355	0.0215954	molybdate-anion transporter-like	1374	20	0	98.22	3	F:GO:0015098; P:GO:0015689; C:GO:0016021	F:molybdate ion transmembrane transporter activity; P:molybdate ion transport; C:integral component of membrane	EC:7	n/a	-	-	-	-	-
HORVU.MOREX.r3.7HG0640710.1	1.20177	0	37.3496	60.9626	24.8785	0.600883	49.1561	81.8065	6.35414	0.000217185	0.00537523	cytosolic sulfotransferase 13-like	1065	20	0	87.3	1	F:GO:0008146	F:sulfotransferase activity	EC:2.8.2; EC:2; EC:2.8	Transferring sulfur-containing groups; Transferases; Transferring sulfur-containing groups	-	-	-	-	-
HORVU.MOREX.r3.7HG0661680.1	0	0	189.621	136.364	81.4962	0	162.992	Inf	Inf	6.01E-12	6.45E-09	pathogenesis-related protein 1	495	20	5.14E-96	97.39	3	C:GO:0005615; P:GO:0006952; P:GO:0009607	C:extracellular space; P:defense response; P:response to biotic stimulus	-	-	-	-	-	K13449	MAPK signaling pathway - plant; Plant hormone signal transduction; Plant-pathogen interaction;
HORVU.MOREX.r3.5HG0481820.1	4.20618	2.05977	60.3339	62.5669	32.2917	3.13297	61.4504	19.6141	4.29382	0.000846267	0.015784	glutamate receptor 2.8-like	2772	20	0	88.67	6	F:GO:0004930; C:GO:0005886; P:GO:0007186; F:GO:0015276; C:GO:0016021; P:GO:0034220	F:G protein-coupled receptor activity; C:plasma membrane; P:G protein-coupled receptor signaling pathway; F:ligand-gated ion channel activity; C:integral component of membrane; P:ion transmembrane transport	EC:7	n/a	-	-	-	-	-
HORVU.MOREX.r3.1HG0053340.1	1.20177	4.11953	51.7148	102.674	39.9275	2.66065	77.1943	29.0133	4.85864	6.81E-05	0.00212113	retrotransposon protein, putative, unclassified	672	20	4.59E-107	59.88	2	C:GO:0016020; C:GO:0016021	C:membrane; C:integral component of membrane	-	-	-	-	-	-	-
HORVU.MOREX.r3.2HG0126430.1	16.2238	12.3586	333.273	519.787	220.411	14.2912	426.53	29.8456	4.89945	6.44E-08	6.69E-06	serine/threonine-protein phosphatase 7 long form homolog	1083	20	7.12E-173	74.88	2	P:GO:0010073; P:GO:0048507	P:meristem maintenance; P:meristem development	-	-	-	-	-	-	-
HORVU.MOREX.r3.6HG0568520.1	1.20177	0	27.7728	51.3369	20.0779	0.600883	39.5549	65.8279	6.04063	0.00115679	0.0203522	cbl-interacting protein kinase 13	450	20	2.54E-83	91.42	-	-	-	-	-	-	-	-	-	-
HORVU.MOREX.r3.2HG0210640.1	10.215	7.20919	158.975	277.54	113.485	8.71209	218.258	25.0523	4.64687	1.16E-06	7.45E-05	40S ribosomal protein S5-1	2091	20	0	86.91	1	F:GO:0008233	F:peptidase activity	EC:3.4; EC:3	Acting on peptide bonds (peptidases); Hydrolases	-	-	-	-	-
HORVU.MOREX.r3.5HG0482520.1	68.5006	60.7631	616.747	906.418	413.107	64.6319	761.582	11.7834	3.55868	3.09E-05	0.00109392	Lactation elevated protein 1	633	20	4.70E-114	86.41	-	-	-	-	-	-	-	-	-	-
HORVU.MOREX.r3.5HG0476860.1	0	1.02988	35.4342	41.7113	19.5438	0.514942	38.5727	74.907	6.22703	0.000463559	0.00984408	disease resistance protein RGA5-like isoform X1	825	20	3.79E-159	93.27	2	P:GO:0006952; F:GO:0043531	P:defense response; F:ADP binding	-	-	-	-	-	-	-
HORVU.MOREX.r3.1HG0093670.1	26.4388	29.8666	235.59	221.391	128.321	28.1527	228.49	8.11609	3.02079	0.000247684	0.00591936	ribonuclease 1-like	759	20	2.11E-170	88.4	5	F:GO:0003723; C:GO:0005576; P:GO:0006401; F:GO:0033897; P:GO:0090502	F:RNA binding; C:extracellular region; P:RNA catabolic process; F:ribonuclease T2 activity; P:RNA phosphodiester bond hydrolysis, endonucleolytic	EC:3.1; EC:3; EC:4; EC:4.6; EC:4.6.1.19	Acting on ester bonds; Hydrolases; Lyases; Phosphorus-oxygen lyases; n/a	-	-	-	-	-
HORVU.MOREX.r3.7HG0729680.1	0	0	10.5345	9.62568	5.04004	0	10.0801	Inf	Inf	0.0438861	0.249841	translation initiation factor IF-2-like	270	20	3.66E-47	95.2	-	-	-	-	-	-	-	-	-	-
HORVU.MOREX.r3.5HG0514190.1	444.653	595.273	48.8417	28.877	279.411	519.963	38.8594	0.0747349	-3.74207	1.19E-05	0.000498537	probable CoA ligase CCL6	1989	20	0	98.19	6	P:GO:0001676; F:GO:0004467; F:GO:0005524; P:GO:0009698; F:GO:0016207; F:GO:0106290	P:long-chain fatty acid metabolic process; F:long-chain fatty acid-CoA ligase activity; F:ATP binding; P:phenylpropanoid metabolic process; F:4-coumarate-CoA ligase activity; F:trans-cinnamate-CoA ligase activity	EC:6.2.1.12; EC:6.2; EC:6.2.1.3; EC:6; EC:6.2.1	4-coumarate--CoA ligase; Forming carbon-sulfur bonds; Long-chain-fatty-acid--CoA ligase; Ligases; Forming carbon-sulfur bonds	-	-	-	K01897	Metabolic pathways; Quorum sensing; Adipocytokine signaling pathway; PPAR signaling pathway;
HORVU.MOREX.r3.7HG0724140.1	103.352	122.556	22.9844	19.2514	67.0359	112.954	21.1179	0.18696	-2.4192	0.00979693	0.0989577	berberine bridge enzyme-like Cyn d 4	1593	20	0	90.18	2	F:GO:0016491; F:GO:0071949	F:oxidoreductase activity; F:FAD binding	EC:1	Oxidoreductases	-	-	-	-	-
HORVU.MOREX.r3.6HG0546900.1	9.01324	11.3287	157.06	240.642	104.511	10.171	198.851	19.5508	4.28916	3.69E-06	0.000188878	uncharacterized protein LOC123190913 isoform X2	1878	20	0	90.34	-	-	-	-	-	-	-	-	-	-
HORVU.MOREX.r3.1HG0088540.1	12.6185	4.11953	67.0377	85.0268	42.2006	8.36903	76.0323	9.08495	3.18348	0.00564007	0.0669691	BTB/POZ and MATH domain-containing protein 3-like	1143	20	0	79.44	2	P:GO:0009628; P:GO:0016567	P:response to abiotic stimulus; P:protein ubiquitination	-	-	-	-	-	K10523	-
HORVU.MOREX.r3.5HG0467150.1	5.40794	14.4184	90.022	77.0054	46.7134	9.91316	83.5137	8.42453	3.0746	0.00171514	0.0278283	zinc finger protein CONSTANS-LIKE 12-like	597	20	6.63E-96	78.17	2	C:GO:0005634; P:GO:0009909	C:nucleus; P:regulation of flower development	-	-	-	-	-	-	-
HORVU.MOREX.r3.2HG0151580.1	2.40353	0	51.7148	70.5883	31.1767	1.20177	61.1515	50.8848	5.66916	0.000128546	0.00358031	retrotransposon protein, putative, unclassified	675	20	4.52E-91	75.05	4	F:GO:0003676; F:GO:0004523; F:GO:0046872; P:GO:0090502	F:nucleic acid binding; F:RNA-DNA hybrid ribonuclease activity; F:metal ion binding; P:RNA phosphodiester bond hydrolysis, endonucleolytic	EC:3.1.30; EC:3.1; EC:3; EC:3.1.26; EC:3.1.26.4	Acting on ester bonds; Acting on ester bonds; Hydrolases; Acting on ester bonds; Ribonuclease H	-	-	-	-	-
HORVU.MOREX.r3.5HG0427370.1	12.0177	4.11953	52.6725	44.9198	28.4324	8.06859	48.7962	6.04767	2.59638	0.0379071	0.229849	predicted protein	1629	20	0	87.52	-	-	-	-	-	-	-	-	-	-
HORVU.MOREX.r3.5HG0536260.1	438.043	374.878	71.8261	56.1498	235.224	406.46	63.9879	0.157427	-2.66724	0.000853322	0.0158997	beta-fructofuranosidase, insoluble isoenzyme 4-like isoform X1	1791	20	0	96.92	4	F:GO:0004553; P:GO:0005975; P:GO:0006520; F:GO:0016491	F:hydrolase activity, hydrolyzing O-glycosyl compounds; P:carbohydrate metabolic process; P:cellular amino acid metabolic process; F:oxidoreductase activity	EC:3.2; EC:1; EC:3; EC:3.2.1	Glycosylases; Oxidoreductases; Hydrolases; Glycosylases	-	-	-	-	-
HORVU.MOREX.r3.6HG0574750.1	0	2.05977	38.3073	65.7755	26.5356	1.02988	52.0414	50.5313	5.65911	0.000137043	0.00376668	predicted protein	693	20	1.20E-140	85.86	1	P:GO:0032196	P:transposition	-	-	-	-	-	-	-
HORVU.MOREX.r3.6HG0592100.1	2.40353	2.05977	62.2493	73.7969	35.1274	2.23165	68.0231	30.4811	4.92984	0.000135091	0.00372394	zinc finger BED domain-containing protein RICESLEEPER 2-like	1068	20	0	74.93	2	F:GO:0003677; F:GO:0046983	F:DNA binding; F:protein dimerization activity	-	-	-	-	-	-	-
HORVU.MOREX.r3.5HG0495450.1	10.215	7.20919	49.7994	75.4011	35.6562	8.71209	62.6003	7.18545	2.84508	0.0160304	0.138168	retrotransposon protein, putative, unclassified	1242	20	0	76.01	4	F:GO:0003676; F:GO:0004523; F:GO:0046872; P:GO:0090502	F:nucleic acid binding; F:RNA-DNA hybrid ribonuclease activity; F:metal ion binding; P:RNA phosphodiester bond hydrolysis, endonucleolytic	EC:3.1.30; EC:3.1; EC:3; EC:3.1.26; EC:3.1.26.4	Acting on ester bonds; Acting on ester bonds; Hydrolases; Acting on ester bonds; Ribonuclease H	-	-	-	-	-
HORVU.MOREX.r3.1HG0090910.1	1.20177	2.05977	21.069	20.8556	11.2965	1.63077	20.9623	12.8543	3.68418	0.0442419	0.251162	predicted protein	1575	20	0	62.25	-	-	-	-	-	-	-	-	-	-
HORVU.MOREX.r3.2HG0201260.1	127.988	128.735	5586.16	9158.83	3750.43	128.362	7372.49	57.4353	5.84387	2.59E-06	0.000141153	DDE-type integrase/transposase/recombinase	3984	20	0	79.41	4	F:GO:0003676; F:GO:0008270; P:GO:0015074; F:GO:0016779	F:nucleic acid binding; F:zinc ion binding; P:DNA integration; F:nucleotidyltransferase activity	EC:2.7; EC:2; EC:2.7.7	Transferring phosphorus-containing groups; Transferases; Transferring phosphorus-containing groups	-	-	-	-	-
HORVU.MOREX.r3.5HG0521250.1	6.00883	4.11953	65.1223	99.4653	43.679	5.06418	82.2938	16.2502	4.02238	0.000526357	0.0109002	retrotransposon protein, putative, Ty1-copia subclass	222	20	1.35E-41	95.75	6	F:GO:0003676; F:GO:0003964; P:GO:0006278; F:GO:0008270; P:GO:0015074; C:GO:0016021	F:nucleic acid binding; F:RNA-directed DNA polymerase activity; P:RNA-templated DNA biosynthetic process; F:zinc ion binding; P:DNA integration; C:integral component of membrane	EC:2.7; EC:2; EC:2.7.7.49; EC:2.7.7	Transferring phosphorus-containing groups; Transferases; RNA-directed DNA polymerase; Transferring phosphorus-containing groups	-	-	-	-	-
HORVU.MOREX.r3.7HG0709010.1	0	0	16.2806	32.0856	12.0915	0	24.1831	Inf	Inf	0.00263632	0.0385738	B3 domain-containing protein	585	20	5.57E-109	95.78	-	-	-	-	-	-	-	-	-	-
HORVU.MOREX.r3.1HG0015080.1	0	0	59.3762	80.214	34.8976	0	69.7951	Inf	Inf	5.46E-07	4.00E-05	predicted protein	759	20	4.68E-140	72.1	3	F:GO:0003676; F:GO:0008408; P:GO:0090305	F:nucleic acid binding; F:3'-5' exonuclease activity; P:nucleic acid phosphodiester bond hydrolysis	EC:3.1; EC:3	Acting on ester bonds; Hydrolases	-	-	-	-	-
HORVU.MOREX.r3.5HG0452920.1	4.20618	2.05977	37.3496	27.2728	17.7221	3.13297	32.3112	10.3133	3.36643	0.0281673	0.194524	uncharacterized protein LOC123425314	954	20	0	97.55	-	-	-	-	-	-	-	-	-	-
HORVU.MOREX.r3.7HG0635300.1	4762.6	4992.88	281.558	187.701	2556.18	4877.74	234.63	0.0481021	-4.37776	5.69E-05	0.00182022	sucrose:fructan 6-fructosyltransferase	1866	20	0	97.56	5	F:GO:0004553; P:GO:0005975; C:GO:0016021; F:GO:0050053; F:GO:0050306	F:hydrolase activity, hydrolyzing O-glycosyl compounds; P:carbohydrate metabolic process; C:integral component of membrane; F:levansucrase activity; F:sucrose 1F-fructosyltransferase activity	EC:3.2; EC:2.4; EC:2; EC:3; EC:2.4.1.10; EC:2.4.1.99; EC:2.4.1; EC:3.2.1	Glycosylases; Glycosyltransferases; Transferases; Hydrolases; Levansucrase; Sucrose:sucrose fructosyltransferase; Glycosyltransferases; Glycosylases	-	-	-	-	-
HORVU.MOREX.r3.1HG0094280.1	22.8335	19.5678	143.652	240.642	106.674	21.2007	192.147	9.06326	3.18003	0.000407258	0.00884867	protein FAR1-RELATED SEQUENCE 5-like	438	20	1.61E-94	74.2	-	-	-	-	-	-	-	-	-	-
HORVU.MOREX.r3.4HG0405470.1	0	0	8.61913	12.8342	5.36334	0	10.7267	Inf	Inf	0.042105	0.243846	probable flavin-containing monooxygenase 1	1596	20	0	98.47	3	F:GO:0004499; F:GO:0050660; F:GO:0050661	F:N,N-dimethylaniline monooxygenase activity; F:flavin adenine dinucleotide binding; F:NADP binding	EC:1.14.13.8; EC:1; EC:1.14; EC:1.14.13	Flavin-containing monooxygenase; Oxidoreductases; Acting on paired donors, with incorporation or reduction of molecular oxygen. The oxygen incorporated need not be derived from O(2); Acting on paired donors, with incorporation or reduction of molecular oxygen. The oxygen incorporated need not be derived from O(2)	-	-	-	K00485	Metabolic pathways; Drug metabolism - cytochrome P450;
HORVU.MOREX.r3.4HG0407300.1	0	0	14.3652	9.62568	5.99772	0	11.9954	Inf	Inf	0.0262082	0.186963	xyloglucan galactosyltransferase KATAMARI1 homolog	1515	20	0	93.18	4	C:GO:0005794; P:GO:0006486; C:GO:0016021; F:GO:0016757	C:Golgi apparatus; P:protein glycosylation; C:integral component of membrane; F:glycosyltransferase activity	EC:2.4; EC:2	Glycosyltransferases; Transferases	-	-	-	-	-
HORVU.MOREX.r3.2HG0116940.1	145.414	188.469	19.1536	3.20856	89.0611	166.941	11.1811	0.0669763	-3.90021	7.50E-05	0.00228686	aspartyl protease AED3-like	1347	20	0	96.28	4	F:GO:0003677; F:GO:0004190; P:GO:0006508; C:GO:0016021	F:DNA binding; F:aspartic-type endopeptidase activity; P:proteolysis; C:integral component of membrane	EC:3.4.23; EC:3.4; EC:3	Acting on peptide bonds (peptidases); Acting on peptide bonds (peptidases); Hydrolases	-	-	-	-	-
HORVU.MOREX.r3.4HG0331840.1	51.075	46.3448	236.547	364.171	174.535	48.7099	300.359	6.16629	2.6244	0.00168689	0.027465	disease resistance RPP13-like protein 4	3183	20	0	88.42	2	P:GO:0006952; F:GO:0043531	P:defense response; F:ADP binding	-	-	-	-	-	-	-
HORVU.MOREX.r3.6HG0623120.1	3.6053	6.1793	88.1067	162.032	64.9809	4.8923	125.069	25.5646	4.67607	8.18E-06	0.000364156	L-type lectin-domain containing receptor kinase SIT2-like	2094	20	0	92.56	9	P:GO:0002229; F:GO:0004675; F:GO:0005524; C:GO:0005886; P:GO:0006468; P:GO:0007178; C:GO:0016021; F:GO:0030246; P:GO:0042742	P:defense response to oomycetes; F:transmembrane receptor protein serine/threonine kinase activity; F:ATP binding; C:plasma membrane; P:protein phosphorylation; P:transmembrane receptor protein serine/threonine kinase signaling pathway; C:integral component of membrane; F:carbohydrate binding; P:defense response to bacterium	EC:2.7.1; EC:2.7; EC:2; EC:2.7.11.30	Transferring phosphorus-containing groups; Transferring phosphorus-containing groups; Transferases; Receptor protein serine/threonine kinase	-	-	-	-	-
HORVU.MOREX.r3.1HG0088320.1	55.2812	47.3746	311.246	458.824	218.182	51.3279	385.035	7.50148	2.90717	0.000484698	0.0101778	NBS-LRR disease resistance protein	1338	20	0	79.73	3	F:GO:0004252; P:GO:0006508; C:GO:0016021	F:serine-type endopeptidase activity; P:proteolysis; C:integral component of membrane	EC:3.4.21; EC:3.4; EC:3	Acting on peptide bonds (peptidases); Acting on peptide bonds (peptidases); Hydrolases	-	-	-	-	-
HORVU.MOREX.r3.1HG0055060.1	2.40353	2.05977	22.9844	51.3369	19.6961	2.23165	37.1607	16.6517	4.05759	0.0113075	0.109417	uncharacterized protein LOC123399294	1218	20	0	91.05	-	-	-	-	-	-	-	-	-	-
HORVU.MOREX.r3.6HG0552210.1	2.40353	0	24.8997	16.0428	10.8365	1.20177	20.4713	17.0343	4.09037	0.0426097	0.245704	probable xyloglucan endotransglucosylase/hydrolase protein 30	993	20	0	91.1	6	F:GO:0004553; P:GO:0010411; F:GO:0016762; P:GO:0042546; C:GO:0048046; P:GO:0071555	F:hydrolase activity, hydrolyzing O-glycosyl compounds; P:xyloglucan metabolic process; F:xyloglucan:xyloglucosyl transferase activity; P:cell wall biogenesis; C:apoplast; P:cell wall organization	EC:3.2; EC:2.4.1.207; EC:2.4; EC:2; EC:3; EC:2.4.1; EC:3.2.1	Glycosylases; Xyloglucan:xyloglucosyl transferase; Glycosyltransferases; Transferases; Hydrolases; Glycosyltransferases; Glycosylases	-	-	-	-	-
HORVU.MOREX.r3.2HG0158800.1	6.60971	5.14942	265.278	385.027	165.516	5.87956	325.152	55.3021	5.78926	1.88E-09	3.63E-07	hypothetical protein CFC21_021060	483	20	1.61E-37	73.68	1	C:GO:0016020	C:membrane	-	-	-	-	-	-	-
HORVU.MOREX.r3.4HG0405850.1	3.6053	0	13.4075	48.1284	16.2853	1.80265	30.768	17.0682	4.09324	0.0316096	0.207335	putative pentatricopeptide repeat-containing protein At1g69350, mitochondrial isoform X1	2970	20	0	91.11	5	F:GO:0003723; C:GO:0005829; P:GO:0009451; P:GO:0009903; P:GO:0009904	F:RNA binding; C:cytosol; P:RNA modification; P:chloroplast avoidance movement; P:chloroplast accumulation movement	-	-	-	-	-	-	-
HORVU.MOREX.r3.3HG0289720.1	52.2768	50.4643	8.61913	3.20856	28.6422	51.3705	5.91385	0.115121	-3.11877	0.0169775	0.142967	basic leucine zipper 6-like	801	20	1.61E-141	88.47	4	F:GO:0003677; F:GO:0003700; C:GO:0005634; P:GO:0045893	F:DNA binding; F:DNA-binding transcription factor activity; C:nucleus; P:positive regulation of DNA-templated transcription	-	-	-	-	-	-	-
HORVU.MOREX.r3.1HG0017040.1	0	0	9.57681	12.8342	5.60276	0	11.2055	Inf	Inf	0.0369057	0.226003	hypothetical protein ZWY2020_004145	705	20	4.70E-144	96.51	-	-	-	-	-	-	-	-	-	-
HORVU.MOREX.r3.1HG0086790.1	60.6891	57.6735	601.424	986.632	426.605	59.1813	794.028	13.4169	3.74598	1.46E-05	0.000589	receptor kinase-like protein Xa21	366	20	2.04E-65	78.92	1	C:GO:0016021	C:integral component of membrane	-	-	-	-	-	-	-
HORVU.MOREX.r3.3HG0296530.1	1.20177	0	73.7415	83.4225	39.5914	0.600883	78.582	130.778	7.03097	2.34E-06	0.000130781	putative F-box/FBD/LRR-repeat protein At4g03220	1551	20	0	52.92	-	-	-	-	-	-	-	-	-	-
HORVU.MOREX.r3.7HG0728010.1	0	0	32.5612	46.5241	19.7713	0	39.5426	Inf	Inf	0.000116555	0.00329523	ATP-dependent DNA helicase PIF1-like	2403	20	0	87.44	7	P:GO:0000723; F:GO:0003678; F:GO:0005524; P:GO:0006281; P:GO:0006310; F:GO:0016887; P:GO:0032508	P:telomere maintenance; F:DNA helicase activity; F:ATP binding; P:DNA repair; P:DNA recombination; F:ATP hydrolysis activity; P:DNA duplex unwinding	EC:3.6.1; EC:3.6; EC:3; EC:3.6.1.15	Acting on acid anhydrides; Acting on acid anhydrides; Hydrolases; Nucleoside-triphosphate phosphatase	-	-	-	-	-
HORVU.MOREX.r3.5HG0433730.1	4.80706	3.08965	220.267	304.813	133.244	3.94836	262.54	66.4935	6.05514	1.68E-09	3.30E-07	40S ribosomal protein S5-1	2088	20	0	86.76	1	F:GO:0008233	F:peptidase activity	EC:3.4; EC:3	Acting on peptide bonds (peptidases); Hydrolases	-	-	-	-	-
HORVU.MOREX.r3.2HG0184580.1	0	0	19.1536	17.6471	9.20018	0	18.4004	Inf	Inf	0.00674156	0.0760324	vacuolar-processing enzyme beta-isozyme 1-like	1455	20	0	92.65	4	F:GO:0004197; C:GO:0005773; P:GO:0006624; P:GO:0051603	F:cysteine-type endopeptidase activity; C:vacuole; P:vacuolar protein processing; P:proteolysis involved in protein catabolic process	EC:3.4.22; EC:3.4; EC:3	Acting on peptide bonds (peptidases); Acting on peptide bonds (peptidases); Hydrolases	-	-	-	K01369	Lysosome; Antigen processing and presentation;
HORVU.MOREX.r3.7HG0739400.1	90.1324	60.7631	15.3229	9.62568	43.961	75.4478	12.4743	0.165337	-2.59652	0.0143105	0.128109	histone H2B.3-like	417	20	2.75E-66	97.83	5	C:GO:0000786; F:GO:0003677; C:GO:0005634; P:GO:0006334; F:GO:0046982	C:nucleosome; F:DNA binding; C:nucleus; P:nucleosome assembly; F:protein heterodimerization activity	-	-	-	-	-	K11252	-
HORVU.MOREX.r3.4HG0416260.1	1.20177	0	19.1536	25.6685	11.506	0.600883	22.4111	37.2969	5.22098	0.0176385	0.14619	aspartic proteinase Asp1-like	1233	20	0	93.1	2	F:GO:0004190; P:GO:0006508	F:aspartic-type endopeptidase activity; P:proteolysis	EC:3.4.23; EC:3.4; EC:3	Acting on peptide bonds (peptidases); Acting on peptide bonds (peptidases); Hydrolases	-	-	-	-	-
HORVU.MOREX.r3.3HG0228290.1	0	0	9.57681	25.6685	8.81132	0	17.6226	Inf	Inf	0.0108806	0.106356	sinapine esterase-like	1146	20	0	90.42	1	F:GO:0016788	F:hydrolase activity, acting on ester bonds	EC:3.1; EC:3	Acting on ester bonds; Hydrolases	-	-	-	-	-
HORVU.MOREX.r3.6HG0560740.1	1.20177	0	85.2336	68.984	38.8549	0.600883	77.1088	128.326	7.00367	2.16E-06	0.000123827	predicted protein	774	20	5.88E-151	84.31	1	P:GO:0032196	P:transposition	-	-	-	-	-	-	-
HORVU.MOREX.r3.3HG0305060.1	0	0	22.9844	25.6685	12.1632	0	24.3264	Inf	Inf	0.00208269	0.0321789	protein MAIN-LIKE 1-like	411	20	7.45E-88	96.31	-	-	-	-	-	-	-	-	-	-
HORVU.MOREX.r3.7HG0738140.1	4.80706	3.08965	77.5722	73.7969	39.8164	3.94836	75.6845	19.1686	4.26067	0.000310363	0.00709225	ureide permease 1-like	1239	20	0	96.16	5	F:GO:0005274; F:GO:0015505; P:GO:0015720; C:GO:0016021; P:GO:1903791	F:allantoin:proton symporter activity; F:uracil:cation symporter activity; P:allantoin transport; C:integral component of membrane; P:uracil transmembrane transport	EC:7	n/a	-	-	-	-	-
HORVU.MOREX.r3.1HG0000420.1	80.5183	101.958	23.942	19.2514	56.4175	91.2384	21.5967	0.236706	-2.07883	0.0340287	0.215776	jasmonate induced protein	849	20	0	89.03	1	C:GO:0016021	C:integral component of membrane	-	-	-	-	-	-	-
HORVU.MOREX.r3.7HG0696660.1	0	2.05977	31.6035	52.9412	21.6511	1.02988	42.2724	41.0458	5.35916	0.000672531	0.0132686	diacylglycerol kinase 4-like	1443	20	0	88.81	6	F:GO:0003951; F:GO:0004143; F:GO:0005524; P:GO:0006952; P:GO:0007205; P:GO:0016310	F:NAD+ kinase activity; F:diacylglycerol kinase activity; F:ATP binding; P:defense response; P:protein kinase C-activating G protein-coupled receptor signaling pathway; P:phosphorylation	EC:2.7.1; EC:2.7; EC:2; EC:2.7.1.23; EC:2.7.1.107	Transferring phosphorus-containing groups; Transferring phosphorus-containing groups; Transferases; NAD(+) kinase; Diacylglycerol kinase (ATP)	-	-	-	K00901	Metabolic pathways; Biosynthesis of secondary metabolites; Glycerolipid metabolism; Glycerophospholipid metabolism; Axon regeneration; Choline metabolism in cancer;
HORVU.MOREX.r3.4HG0402700.1	123.782	164.781	12425.9	19832.1	8136.65	144.282	16129	111.788	6.80463	7.58E-06	0.000343261	snf2 domain-containing expressed	1650	20	0	59.39	9	F:GO:0000166; F:GO:0003677; F:GO:0003700; F:GO:0005524; C:GO:0005634; P:GO:0006338; P:GO:0006355; P:GO:0080188; F:GO:0140658	F:nucleotide binding; F:DNA binding; F:DNA-binding transcription factor activity; F:ATP binding; C:nucleus; P:chromatin remodeling; P:regulation of DNA-templated transcription; P:gene silencing by RNA-directed DNA methylation; F:ATP-dependent chromatin remodeler activity	-	-	-	-	-	-	-
HORVU.MOREX.r3.1HG0085810.1	6.00883	4.11953	23.942	88.2354	30.5764	5.06418	56.0887	11.0756	3.46931	0.0103521	0.102683	predicted protein	741	20	1.78E-122	82.12	-	-	-	-	-	-	-	-	-	-
HORVU.MOREX.r3.4HG0337910.1	51.075	36.0459	410.845	567.915	266.47	43.5605	489.38	11.2345	3.48986	4.00E-05	0.00135912	transposon protein, putative, Mariner sub-class	1869	20	0	74.37	1	F:GO:0003676	F:nucleic acid binding	-	-	-	-	-	-	-
HORVU.MOREX.r3.6HG0571610.1	21.0309	19.5678	187.706	271.123	124.857	20.2993	229.414	11.3016	3.49845	6.83E-05	0.00212741	Phosphatidylinositol-4-phosphate 5-kinase 2	585	20	8.72E-118	86.02	1	C:GO:0016021	C:integral component of membrane	-	-	-	-	-	-	-
HORVU.MOREX.r3.5HG0510620.1	8.41236	8.23907	55.5455	49.7327	30.4824	8.32571	52.6391	6.32247	2.66049	0.0220466	0.167524	pentatricopeptide repeat-containing protein At5g19020, mitochondrial-like	1977	20	0	92.91	2	C:GO:0005739; P:GO:0080156	C:mitochondrion; P:mitochondrial mRNA modification	-	-	-	-	-	-	-
HORVU.MOREX.r3.6HG0624260.1	196.489	210.096	9265.57	16784	6614.03	203.292	13024.8	64.0691	6.00156	1.94E-05	0.000747881	DEAD-box ATP-dependent RNA helicase 1	1581	20	0	94.09	3	F:GO:0003676; F:GO:0005524; C:GO:0005634	F:nucleic acid binding; F:ATP binding; C:nucleus	-	-	-	-	-	-	-
HORVU.MOREX.r3.5HG0470480.1	21.0309	18.5379	75.6568	94.6525	52.4695	19.7844	85.1547	4.30413	2.10572	0.0345895	0.218153	BTB/POZ domain-containing protein At5g47800-like isoform X1	1719	20	0	93.98	1	P:GO:0016567	P:protein ubiquitination	-	-	-	-	-	-	-
HORVU.MOREX.r3.7HG0747070.1	1.20177	0	22.9844	16.0428	10.0572	0.600883	19.5136	32.4749	5.02125	0.0237726	0.175697	uncharacterized protein LOC123148715	564	9	8.18E-31	62.13	-	-	-	-	-	-	-	-	-	-
HORVU.MOREX.r3.7HG0694690.1	1.20177	2.05977	25.8574	35.2942	16.1033	1.63077	30.5758	18.7493	4.22877	0.0119048	0.113274	Speckle-type POZ protein-like protein	684	20	1.71E-100	66.03	3	F:GO:0003676; F:GO:0004523; P:GO:0090502	F:nucleic acid binding; F:RNA-DNA hybrid ribonuclease activity; P:RNA phosphodiester bond hydrolysis, endonucleolytic	-	-	-	-	-	-	-
HORVU.MOREX.r3.7HG0638070.1	1.20177	0	53.6302	88.2354	35.7668	0.600883	70.9328	118.048	6.88323	8.63E-06	0.00038059	predicted protein	756	20	1.03E-141	72.78	3	F:GO:0003676; F:GO:0008408; P:GO:0090305	F:nucleic acid binding; F:3'-5' exonuclease activity; P:nucleic acid phosphodiester bond hydrolysis	EC:3.1; EC:3	Acting on ester bonds; Hydrolases	-	-	-	-	-
HORVU.MOREX.r3.1HG0003380.1	0	0	4.78841	19.2514	6.00994	0	12.0199	Inf	Inf	0.0386167	0.23209	Lectin-domain containing receptor kinase A4.3	522	20	1.81E-106	89.94	-	-	-	-	-	-	-	-	-	-
HORVU.MOREX.r3.7HG0722090.1	0	0	17.2383	12.8342	7.51813	0	15.0363	Inf	Inf	0.013271	0.122332	protein MAIN-LIKE 1-like isoform X2	471	20	1.25E-105	89.89	-	-	-	-	-	-	-	-	-	-
HORVU.MOREX.r3.5HG0449680.1	0	0	14.3652	19.2514	8.40414	0	16.8083	Inf	Inf	0.0106317	0.104384	hypothetical protein ZWY2020_032988, partial	774	20	8.21E-153	93.58	-	-	-	-	-	-	-	-	-	-
HORVU.MOREX.r3.5HG0493990.1	0	2.05977	13.4075	56.1498	17.9043	1.02988	34.7787	33.7695	5.07765	0.00345657	0.0469357	hypothetical protein D1007_33148	585	20	8.10E-140	68.8	-	-	-	-	-	-	-	-	-	-
HORVU.MOREX.r3.4HG0395580.1	216.919	328.533	56.5032	44.9198	161.719	272.726	50.7115	0.185943	-2.42707	0.00338777	0.0463028	probable inactive receptor kinase At1g48480	2022	20	0	90.72	4	F:GO:0004672; F:GO:0005524; P:GO:0006468; C:GO:0016021	F:protein kinase activity; F:ATP binding; P:protein phosphorylation; C:integral component of membrane	EC:2.7.1; EC:2.7; EC:2	Transferring phosphorus-containing groups; Transferring phosphorus-containing groups; Transferases	-	-	-	-	-
HORVU.MOREX.r3.2HG0210630.1	8.41236	4.11953	76.6145	46.5241	33.9176	6.26594	61.5693	9.82602	3.29661	0.00444605	0.0565088	16.9 kDa class I heat shock protein 1-like	594	20	5.51E-94	97.47	7	P:GO:0006457; P:GO:0009408; P:GO:0009651; P:GO:0042542; F:GO:0043621; F:GO:0051082; P:GO:0051259	P:protein folding; P:response to heat; P:response to salt stress; P:response to hydrogen peroxide; F:protein self-association; F:unfolded protein binding; P:protein complex oligomerization	-	-	-	-	-	K13993	-
HORVU.MOREX.r3.6HG0561700.1	0	0	13.4075	27.2728	10.1701	0	20.3401	Inf	Inf	0.00574094	0.0676745	Werner syndrome ATP-dependent helicase-like	540	20	5.84E-120	65.22	3	F:GO:0003676; F:GO:0008408; P:GO:0090305	F:nucleic acid binding; F:3'-5' exonuclease activity; P:nucleic acid phosphodiester bond hydrolysis	EC:3.1; EC:3	Acting on ester bonds; Hydrolases	-	-	-	-	-
HORVU.MOREX.r3.3HG0302870.1	25.8379	9.26895	691.446	989.841	429.098	17.5535	840.643	47.8905	5.58167	4.11E-09	7.07E-07	putative LRR receptor-like serine/threonine-protein kinase	2031	20	0	83.62	-	-	-	-	-	-	-	-	-	-
HORVU.MOREX.r3.6HG0622170.1	0	0	9.57681	16.0428	6.4049	0	12.8098	Inf	Inf	0.0270218	0.189845	senescence-specific cysteine protease SAG39-like	1023	20	0	97.51	2	P:GO:0006508; F:GO:0008234	P:proteolysis; F:cysteine-type peptidase activity	EC:3.4; EC:3	Acting on peptide bonds (peptidases); Hydrolases	-	-	-	-	-
HORVU.MOREX.r3.7HG0705090.1	55.2812	33.9862	193.452	235.829	129.637	44.6337	214.64	4.80893	2.26572	0.00790067	0.0851639	molybdate-anion transporter	1371	20	0	93.47	3	F:GO:0015098; P:GO:0015689; C:GO:0016021	F:molybdate ion transmembrane transporter activity; P:molybdate ion transport; C:integral component of membrane	EC:7	n/a	-	-	-	-	-
HORVU.MOREX.r3.2HG0215960.1	0	0	15.3229	20.8556	9.04463	0	18.0893	Inf	Inf	0.00812923	0.086856	hypothetical protein ZWY2020_011517	630	20	1.10E-139	94.41	-	-	-	-	-	-	-	-	-	-
HORVU.MOREX.r3.7HG0746650.1	0.600883	0	22.0267	40.107	15.6836	0.300441	31.0668	103.404	6.69215	0.00225737	0.0342714	UDP-glycosyltransferase 73C6	705	20	5.63E-59	86.02	-	-	-	-	-	-	-	-	-	-
HORVU.MOREX.r3.4HG0358470.1	7.81147	5.14942	164.721	258.289	108.993	6.48045	211.505	32.6374	5.02846	2.69E-07	2.22E-05	hypothetical protein D1007_06532	1770	20	0	91.39	1	P:GO:0010073	P:meristem maintenance	-	-	-	-	-	-	-
HORVU.MOREX.r3.5HG0496570.1	13.2194	3.08965	134.075	227.808	94.548	8.15453	180.942	22.1891	4.47178	7.85E-06	0.000353568	ubiquitin-like-specific protease esd4 isoform x1	2286	20	0	72.6	1	F:GO:0008233	F:peptidase activity	EC:3.4; EC:3	Acting on peptide bonds (peptidases); Hydrolases	-	-	-	-	-
HORVU.MOREX.r3.3HG0298860.1	2.40353	7.20919	76.6145	94.6525	45.2199	4.80636	85.6335	17.8167	4.15516	0.000136784	0.00376232	mutator protein	1632	20	0	90.66	-	-	-	-	-	-	-	-	-	-
HORVU.MOREX.r3.3HG0233730.1	0	0	12.4499	38.5027	12.7381	0	25.4763	Inf	Inf	0.00238918	0.0357276	F-box/LRR-repeat protein 14-like	1278	20	0	82.04	2	C:GO:0019005; P:GO:0031146	C:SCF ubiquitin ligase complex; P:SCF-dependent proteasomal ubiquitin-dependent protein catabolic process	-	-	-	-	-	-	-
HORVU.MOREX.r3.4HG0368930.1	2.40353	0	105.345	186.096	73.4612	1.20177	145.721	121.256	6.92191	1.87E-08	2.37E-06	predicted protein	660	20	3.55E-117	81.78	1	P:GO:0032196	P:transposition	-	-	-	-	-	-	-
HORVU.MOREX.r3.6HG0557570.1	0	0	9.57681	12.8342	5.60276	0	11.2055	Inf	Inf	0.0369057	0.226003	predicted protein	1020	20	0	87.11	-	-	-	-	-	-	-	-	-	-
HORVU.MOREX.r3.7HG0728810.1	465.083	429.461	124.499	80.214	274.814	447.272	102.356	0.228846	-2.12755	0.00794895	0.0854893	xyloglucan endotransglucosylase/hydrolase protein 24-like	858	20	8.87E-178	94	6	F:GO:0004553; P:GO:0010411; F:GO:0016762; P:GO:0042546; C:GO:0048046; P:GO:0071555	F:hydrolase activity, hydrolyzing O-glycosyl compounds; P:xyloglucan metabolic process; F:xyloglucan:xyloglucosyl transferase activity; P:cell wall biogenesis; C:apoplast; P:cell wall organization	EC:3.2; EC:2.4.1.207; EC:2.4; EC:2; EC:3; EC:2.4.1; EC:3.2.1	Glycosylases; Xyloglucan:xyloglucosyl transferase; Glycosyltransferases; Transferases; Hydrolases; Glycosyltransferases; Glycosylases	-	-	-	K14504	Plant hormone signal transduction;
HORVU.MOREX.r3.7HG0659470.1	0	0	8.61913	11.23	4.96227	0	9.92454	Inf	Inf	0.0491191	0.265387	hypothetical protein ZWY2020_032988, partial	774	20	2.90E-154	94.54	-	-	-	-	-	-	-	-	-	-
HORVU.MOREX.r3.4HG0377000.1	0	0	4.78841	20.8556	6.41101	0	12.822	Inf	Inf	0.0328916	0.211934	hypothetical protein ZWY2020_004145	690	20	2.17E-143	95.74	-	-	-	-	-	-	-	-	-	-
HORVU.MOREX.r3.6HG0613120.1	1.20177	0	16.2806	28.877	11.5898	0.600883	22.5788	37.5761	5.23174	0.0188316	0.152542	hypothetical protein ZWY2020_042024	381	5	1.33E-47	73.75	-	-	-	-	-	-	-	-	-	-
HORVU.MOREX.r3.1HG0060360.1	24.6362	13.3885	159.933	186.096	96.0135	19.0123	173.015	9.10012	3.18589	0.000452918	0.00967831	beta-glucosidase 22-like	1644	20	0	96.49	4	P:GO:0005975; F:GO:0008422; C:GO:0009507; F:GO:0102726	P:carbohydrate metabolic process; F:beta-glucosidase activity; C:chloroplast; F:DIMBOA glucoside beta-D-glucosidase activity	EC:3.2; EC:3.2.1.21; EC:3; EC:3.2.1.182; EC:3.2.1	Glycosylases; Beta-glucosidase; Hydrolases; 4-hydroxy-7-methoxy-3-oxo-3,4-dihydro-2H-1,4-benzoxazin-2-yl glucoside; Glycosylases	-	-	-	K01188	Metabolic pathways; Biosynthesis of secondary metabolites; Starch and sucrose metabolism; Cyanoamino acid metabolism; Biosynthesis of various plant secondary metabolites;
HORVU.MOREX.r3.1HG0008660.1	3.6053	6.1793	33.5188	51.3369	23.6601	4.8923	42.4279	8.67239	3.11643	0.0194867	0.155732	unknow protein	741	20	1.50E-144	90.16	-	-	-	-	-	-	-	-	-	-
HORVU.MOREX.r3.7HG0744480.1	0	0	11.4922	16.0428	6.88374	0	13.7675	Inf	Inf	0.0208115	0.162143	uncharacterized protein LOC123411369 isoform X3	846	20	0	75.91	1	F:GO:0003677	F:DNA binding	-	-	-	-	-	-	-
HORVU.MOREX.r3.1HG0010980.1	0	0	11.4922	9.62568	5.27946	0	10.5589	Inf	Inf	0.038517	0.23209	putative germin-like protein 2-1	648	20	1.28E-138	96.03	2	F:GO:0030145; C:GO:0048046	F:manganese ion binding; C:apoplast	-	-	-	-	-	-	-
HORVU.MOREX.r3.3HG0237080.1	385.767	280.128	50.7571	44.9198	190.393	332.947	47.8385	0.143682	-2.79905	0.000457287	0.00974647	protodermal factor 1-like	669	20	6.15E-72	94.67	-	-	-	-	-	-	-	-	-	-
HORVU.MOREX.r3.7HG0689320.1	602.084	525.241	68.9531	117.112	328.348	563.662	93.0327	0.16505	-2.59902	0.000617561	0.0123495	kinesin-like protein KIN-5C	3258	20	0	97.86	7	F:GO:0005524; C:GO:0005737; C:GO:0005819; C:GO:0005874; P:GO:0007018; F:GO:0008017; F:GO:0008574	F:ATP binding; C:cytoplasm; C:spindle; C:microtubule; P:microtubule-based movement; F:microtubule binding; F:plus-end-directed microtubule motor activity	EC:5.6.1.3	n/a	-	-	-	-	-
HORVU.MOREX.r3.3HG0234980.1	0	0	6.70377	22.4599	7.29092	0	14.5818	Inf	Inf	0.0214929	0.165055	B3 domain-containing protein	582	20	2.68E-113	97.09	-	-	-	-	-	-	-	-	-	-
HORVU.MOREX.r3.1HG0023820.1	2.40353	0	22.0267	19.2514	10.9204	1.20177	20.639	17.1739	4.10215	0.0454076	0.254528	MAP7 domain-containing protein 1-like	591	20	3.84E-94	95.86	-	-	-	-	-	-	-	-	-	-
HORVU.MOREX.r3.5HG0524010.1	4.80706	6.1793	33.5188	64.1712	27.1691	5.49318	48.845	8.89194	3.1525	0.0154852	0.135111	UDP-glycosyltransferase 91C1-like	1437	20	0	93.18	1	F:GO:0008194	F:UDP-glycosyltransferase activity	EC:2.4; EC:2	Glycosyltransferases; Transferases	-	-	-	-	-
HORVU.MOREX.r3.6HG0631250.1	0	0	20.1113	48.1284	17.0599	0	34.1198	Inf	Inf	0.000429	0.00925147	protein MAIN-LIKE 2-like	657	20	1.23E-145	94.62	1	P:GO:0010073	P:meristem maintenance	-	-	-	-	-	-	-
HORVU.MOREX.r3.3HG0223870.1	43.8644	51.4942	354.342	441.177	222.719	47.6793	397.759	8.34239	3.06046	0.00016396	0.00433513	putative E3 ubiquitin-protein ligase SINA-like 6	1032	20	0	83.73	1	F:GO:0008270	F:zinc ion binding	-	-	-	-	-	K04506	Ubiquitin mediated proteolysis; p53 signaling pathway;
HORVU.MOREX.r3.7HG0680360.1	4.20618	7.20919	83.3183	75.4011	42.5337	5.70768	79.3597	13.904	3.79743	0.000458222	0.00975833	putative methionyl-tRNA synthetase	648	20	3.11E-121	98.72	-	-	-	-	-	-	-	-	-	-
HORVU.MOREX.r3.1HG0001270.1	1.20177	0	22.9844	12.8342	9.25509	0.600883	17.9093	29.805	4.89748	0.0299861	0.201043	very-long-chain aldehyde decarbonylase GL1-10-like	840	20	0	86.64	10	F:GO:0000254; F:GO:0005506; C:GO:0005789; P:GO:0006950; P:GO:0009628; F:GO:0009924; C:GO:0016021; P:GO:0016126; P:GO:1901700; F:GO:1990465	F:C-4 methylsterol oxidase activity; F:iron ion binding; C:endoplasmic reticulum membrane; P:response to stress; P:response to abiotic stimulus; F:octadecanal decarbonylase activity; C:integral component of membrane; P:sterol biosynthetic process; P:response to oxygen-containing compound; F:aldehyde oxygenase (deformylating) activity	EC:4.1.99.5; EC:4.1; EC:1; EC:1.14; EC:4; EC:1.14.18; EC:1.14.18.9	Aldehyde oxygenase (deformylating); Carbon-carbon lyases; Oxidoreductases; Acting on paired donors, with incorporation or reduction of molecular oxygen. The oxygen incorporated need not be derived from O(2); Lyases; Acting on paired donors, with incorporation or reduction of molecular oxygen. The oxygen incorporated need not be derived from O(2); Methylsterol monooxygenase	-	-	-	K14423	Metabolic pathways; Biosynthesis of secondary metabolites;
HORVU.MOREX.r3.2HG0194660.1	0	0	10.5345	16.0428	6.64432	0	13.2886	Inf	Inf	0.023695	0.175365	putative LRR receptor-like serine/threonine-protein kinase	339	20	8.00E-59	95.27	-	-	-	-	-	-	-	-	-	-
HORVU.MOREX.r3.2HG0164540.1	4.80706	4.11953	35.4342	44.9198	22.3202	4.4633	40.177	9.00165	3.17019	0.0233073	0.173888	ethylene-responsive transcription factor LEP-like	792	20	5.18E-132	86.37	4	F:GO:0003677; F:GO:0003700; C:GO:0005634; P:GO:0006355	F:DNA binding; F:DNA-binding transcription factor activity; C:nucleus; P:regulation of DNA-templated transcription	-	-	-	-	-	-	-
HORVU.MOREX.r3.6HG0548350.1	0	0	5.74609	19.2514	6.24936	0	12.4987	Inf	Inf	0.0336722	0.214457	mannose/glucose-specific lectin	2001	20	0	67.38	1	F:GO:0005488	F:binding	-	-	-	-	-	-	-
HORVU.MOREX.r3.6HG0611340.1	0	0	10.5345	22.4599	8.2486	0	16.4972	Inf	Inf	0.0129377	0.119993	amino acid transporter AVT6A-like	1347	20	0	91.49	4	P:GO:0003333; C:GO:0005886; F:GO:0015171; C:GO:0016021	P:amino acid transmembrane transport; C:plasma membrane; F:amino acid transmembrane transporter activity; C:integral component of membrane	EC:7	n/a	-	-	-	K14207	Protein digestion and absorption;
HORVU.MOREX.r3.7HG0749440.1	7.21059	10.2988	48.8417	36.8984	25.8124	8.75471	42.8701	4.8968	2.29184	0.0498668	0.267813	predicted protein	1371	20	0	80.34	-	-	-	-	-	-	-	-	-	-
HORVU.MOREX.r3.7HG0723180.1	0	0	17.2383	24.0642	10.3256	0	20.6512	Inf	Inf	0.00476719	0.0594039	BTB/POZ and MATH domain-containing protein 1-like	1089	20	0	82.79	2	P:GO:0009628; P:GO:0016567	P:response to abiotic stimulus; P:protein ubiquitination	-	-	-	-	-	K10523	-
HORVU.MOREX.r3.2HG0160310.1	0.600883	0	14.3652	25.6685	10.1586	0.300441	20.0168	66.6248	6.05799	0.0159121	0.13737	hypothetical protein ZWY2020_032988, partial	690	20	6.34E-142	95.52	-	-	-	-	-	-	-	-	-	-
HORVU.MOREX.r3.5HG0534600.1	0	0	7.66145	35.2942	10.7389	0	21.4778	Inf	Inf	0.00570153	0.0673793	predicted protein	1380	20	0	87.42	1	C:GO:0016021	C:integral component of membrane	-	-	-	-	-	-	-
HORVU.MOREX.r3.3HG0257200.1	7.81147	5.14942	294.966	450.803	189.682	6.48045	372.884	57.5399	5.84649	1.19E-09	2.56E-07	predicted protein	762	20	3.52E-171	91.03	1	P:GO:0032196	P:transposition	-	-	-	-	-	-	-
HORVU.MOREX.r3.5HG0518840.1	1.20177	0	98.6412	152.407	63.0624	0.600883	125.524	208.899	7.70666	1.38E-08	1.88E-06	transcription initiation factor IIA subunit 1-like isoform X1	960	20	0	75.07	2	C:GO:0005672; P:GO:0006367	C:transcription factor TFIIA complex; P:transcription initiation at RNA polymerase II promoter	-	-	-	-	-	K03122	Basal transcription factors;
HORVU.MOREX.r3.6HG0566030.1	0	0	21.069	32.0856	13.2886	0	26.5773	Inf	Inf	0.00150789	0.0250392	hypothetical protein ZWY2020_032988, partial	774	20	1.29E-150	94.98	-	-	-	-	-	-	-	-	-	-
HORVU.MOREX.r3.5HG0506030.1	1.20177	0	17.2383	22.4599	10.225	0.600883	19.8491	33.0332	5.04585	0.0271085	0.19009	hypothetical protein ZWY2020_024301	591	20	9.45E-90	94.79	-	-	-	-	-	-	-	-	-	-
HORVU.MOREX.r3.4HG0346240.1	0	0	4.78841	20.8556	6.41101	0	12.822	Inf	Inf	0.0328916	0.211934	serine/threonine-protein phosphatase 7 long form homolog	438	20	2.22E-91	90.31	-	-	-	-	-	-	-	-	-	-
HORVU.MOREX.r3.2HG0164370.1	0	0	12.4499	16.0428	7.12316	0	14.2463	Inf	Inf	0.018314	0.149316	hypothetical protein ZWY2020_013110	330	20	1.30E-27	93.49	-	-	-	-	-	-	-	-	-	-
HORVU.MOREX.r3.7HG0690940.1	0	0	66.08	65.7755	32.9639	0	65.9277	Inf	Inf	7.85E-07	5.49E-05	serine/threonine-protein phosphatase 7 long form homolog isoform X1	1188	20	0	85.21	-	-	-	-	-	-	-	-	-	-
HORVU.MOREX.r3.7HG0752120.1	3.00441	0	34.4765	27.2728	16.1884	1.50221	30.8746	20.5529	4.36127	0.0132423	0.122218	putative disease resistance protein RGA3	4404	20	0	75.53	2	P:GO:0006952; F:GO:0043531	P:defense response; F:ADP binding	-	-	-	-	-	-	-
HORVU.MOREX.r3.7HG0690730.1	7.21059	6.1793	65.1223	72.1926	37.6762	6.69495	68.6575	10.2551	3.35827	0.00332229	0.0455904	Alanyl-tRNA synthetase	1113	20	0	78.28	1	C:GO:0005739	C:mitochondrion	-	-	-	-	-	-	-
HORVU.MOREX.r3.4HG0374550.1	2.40353	1.02988	46.9264	51.3369	25.4242	1.71671	49.1317	28.6197	4.83894	0.000999731	0.018037	predicted protein	693	20	2.45E-131	88.37	1	P:GO:0032196	P:transposition	-	-	-	-	-	-	-
HORVU.MOREX.r3.5HG0438220.1	0	0	5.74609	24.0642	7.45257	0	14.9051	Inf	Inf	0.0209979	0.162861	B3 domain-containing protein LOC_Os12g40080-like isoform X1	975	20	0	90.52	2	F:GO:0003677; C:GO:0005634	F:DNA binding; C:nucleus	-	-	-	-	-	-	-
HORVU.MOREX.r3.1HG0042290.1	7.21059	2.05977	34.4765	67.3797	27.7817	4.63518	50.9281	10.9873	3.45777	0.012856	0.119504	putative disease resistance protein RGA3	4842	20	0	78.44	3	P:GO:0006952; C:GO:0016021; F:GO:0043531	P:defense response; C:integral component of membrane; F:ADP binding	-	-	-	-	-	-	-
HORVU.MOREX.r3.2HG0135500.1	0	0	17.2383	27.2728	11.1278	0	22.2555	Inf	Inf	0.00357737	0.0481235	putative caffeine synthase 2	327	20	3.79E-25	66.38	-	-	-	-	-	-	-	-	-	-
HORVU.MOREX.r3.7HG0723890.1	1.80265	2.05977	18.1959	40.107	15.5413	1.93121	29.1515	15.0949	3.91599	0.0247163	0.180154	hypothetical protein ZWY2020_010768	339	20	2.06E-69	89.78	3	F:GO:0003676; F:GO:0004523; P:GO:0090502	F:nucleic acid binding; F:RNA-DNA hybrid ribonuclease activity; P:RNA phosphodiester bond hydrolysis, endonucleolytic	EC:3.1.30; EC:3.1; EC:3; EC:3.1.26; EC:3.1.26.4	Acting on ester bonds; Acting on ester bonds; Hydrolases; Acting on ester bonds; Ribonuclease H	-	-	-	-	-
HORVU.MOREX.r3.6HG0610120.1	10.215	11.3287	188.663	325.669	133.969	10.7719	257.166	23.8739	4.57736	6.35E-07	4.54E-05	predicted protein	672	20	2.62E-150	90.7	1	P:GO:0032196	P:transposition	-	-	-	-	-	-	-
HORVU.MOREX.r3.5HG0424560.1	3.6053	10.2988	39.2649	48.1284	25.3244	6.95207	43.6967	6.28542	2.65201	0.028355	0.194901	glutathione S-transferase 4-like	672	20	3.99E-148	96.73	3	F:GO:0004364; P:GO:0006749; P:GO:0009636	F:glutathione transferase activity; P:glutathione metabolic process; P:response to toxic substance	EC:2.5.1; EC:2.5.1.18; EC:2	Transferring alkyl or aryl groups, other than methyl groups; Glutathione transferase; Transferases	-	-	-	K00799	Metabolic pathways; Metabolism of xenobiotics by cytochrome P450; Drug metabolism - cytochrome P450; Drug metabolism - other enzymes; Chemical carcinogenesis - DNA adducts; Chemical carcinogenesis - receptor activation; Chemical carcinogenesis - reactive oxygen species;
HORVU.MOREX.r3.3HG0307320.1	0	0	10.5345	9.62568	5.04004	0	10.0801	Inf	Inf	0.0438861	0.249841	B3 domain-containing protein	582	20	2.48E-114	93.85	-	-	-	-	-	-	-	-	-	-
HORVU.MOREX.r3.6HG0614190.1	0	0	10.5345	12.8342	5.84218	0	11.6844	Inf	Inf	0.0323601	0.210091	hypothetical protein D1007_38035	534	20	1.22E-128	96.94	-	-	-	-	-	-	-	-	-	-
HORVU.MOREX.r3.4HG0413290.1	0	0	47.8841	75.4011	30.8213	0	61.6426	Inf	Inf	2.20E-06	0.000124922	predicted protein	759	20	1.35E-141	72.11	3	F:GO:0003676; F:GO:0008408; P:GO:0090305	F:nucleic acid binding; F:3'-5' exonuclease activity; P:nucleic acid phosphodiester bond hydrolysis	EC:3.1; EC:3	Acting on ester bonds; Hydrolases	-	-	-	-	-
HORVU.MOREX.r3.5HG0444020.1	0	4.11953	18.1959	24.0642	11.5949	2.05977	21.1301	10.2585	3.35874	0.0465754	0.258221	stress response protein NST1	876	20	5.25E-178	87.08	-	-	-	-	-	-	-	-	-	-
HORVU.MOREX.r3.1HG0088060.1	1.20177	2.05977	18.1959	36.8984	14.589	1.63077	27.5472	16.8922	4.07828	0.0215216	0.165139	predicted protein	2397	20	0	76.52	1	C:GO:0016020	C:membrane	-	-	-	-	-	-	-
HORVU.MOREX.r3.4HG0410080.1	4.80706	5.14942	171.425	250.268	107.912	4.97824	210.846	42.3536	5.40441	4.29E-08	4.87E-06	protein PXR1-like	291	20	2.20E-34	87.02	-	-	-	-	-	-	-	-	-	-
HORVU.MOREX.r3.2HG0147270.1	19.8291	13.3885	232.717	434.76	175.173	16.6088	333.738	20.0941	4.3287	1.72E-06	0.000101132	hypothetical protein ZWY2020_020930	1644	20	0	84.17	-	-	-	-	-	-	-	-	-	-
HORVU.MOREX.r3.5HG0505660.1	793.766	743.576	149.398	211.765	474.626	768.671	180.582	0.234927	-2.08972	0.00604178	0.0703158	fatty acyl-CoA reductase 1-like	1497	20	0	94.47	6	P:GO:0010345; C:GO:0016021; P:GO:0035336; C:GO:0043231; F:GO:0080019; F:GO:0102965	P:suberin biosynthetic process; C:integral component of membrane; P:long-chain fatty-acyl-CoA metabolic process; C:intracellular membrane-bounded organelle; F:fatty-acyl-CoA reductase (alcohol-forming) activity; F:alcohol-forming fatty acyl-CoA reductase activity	EC:1.2; EC:1; EC:1.2.1.84; EC:1.2.1	Acting on the aldehyde or oxo group of donors; Oxidoreductases; Alcohol-forming fatty acyl-CoA reductase; Acting on the aldehyde or oxo group of donors	-	-	-	K13356	Cutin, suberine and wax biosynthesis;
HORVU.MOREX.r3.5HG0428960.1	6.00883	15.4483	485.544	847.06	338.515	10.7285	666.302	62.1056	5.95665	1.45E-10	5.35E-08	cationic amino acid transporter 1-like	1584	20	0	93.59	6	F:GO:0005313; C:GO:0005886; F:GO:0015189; P:GO:0015813; C:GO:0016021; P:GO:1903401	F:L-glutamate transmembrane transporter activity; C:plasma membrane; F:L-lysine transmembrane transporter activity; P:L-glutamate transmembrane transport; C:integral component of membrane; P:L-lysine transmembrane transport	EC:7	n/a	-	-	-	-	-
HORVU.MOREX.r3.2HG0194690.1	0	0	15.3229	32.0856	11.8521	0	23.7042	Inf	Inf	0.00295487	0.0420064	polyphenol oxidase	1728	20	0	88.05	3	F:GO:0004097; P:GO:0046148; F:GO:0046872	F:catechol oxidase activity; P:pigment biosynthetic process; F:metal ion binding	EC:1.10; EC:1; EC:1.10.3; EC:1.10.3.1	Acting on diphenols and related substances as donors; Oxidoreductases; Acting on diphenols and related substances as donors; Catechol oxidase	-	-	-	K00422	Metabolic pathways; Biosynthesis of secondary metabolites; Tyrosine metabolism; Isoquinoline alkaloid biosynthesis;
HORVU.MOREX.r3.7HG0719060.1	0	2.05977	64.1646	85.0268	37.8128	1.02988	74.5957	72.4312	6.17854	4.40E-06	0.00021762	outer envelope protein 61-like	1245	20	0	89.93	1	C:GO:0016021	C:integral component of membrane	-	-	-	-	-	-	-
HORVU.MOREX.r3.7HG0718590.1	0	0	30.6458	17.6471	12.0732	0	24.1464	Inf	Inf	0.00170593	0.0277269	mutator protein	417	20	4.81E-97	97.7	1	P:GO:0010073	P:meristem maintenance	-	-	-	-	-	-	-
HORVU.MOREX.r3.7HG0731350.1	0	0	14.3652	22.4599	9.20628	0	18.4126	Inf	Inf	0.00791845	0.0852102	probable methyltransferase PMT9	1842	20	0	95.8	5	C:GO:0005737; F:GO:0008168; C:GO:0016021; P:GO:0032259; C:GO:0043231	C:cytoplasm; F:methyltransferase activity; C:integral component of membrane; P:methylation; C:intracellular membrane-bounded organelle	EC:2.1; EC:2; EC:2.1.1	Transferring one-carbon groups; Transferases; Transferring one-carbon groups	-	-	-	-	-
HORVU.MOREX.r3.6HG0548470.1	11.4168	12.3586	696.234	994.653	428.666	11.8877	845.444	71.1193	6.15217	1.12E-10	4.51E-08	histone H2A.1-like	519	20	1.18E-56	93.63	4	C:GO:0000786; F:GO:0003677; C:GO:0005634; F:GO:0046982	C:nucleosome; F:DNA binding; C:nucleus; F:protein heterodimerization activity	-	-	-	-	-	-	-
HORVU.MOREX.r3.3HG0285780.1	2.40353	2.05977	25.8574	22.4599	13.1952	2.23165	24.1587	10.8255	3.43636	0.0459544	0.256673	putative leucine-rich repeat receptor-like serine/threonine-protein kinase At2g19230	2772	20	0	90.54	4	F:GO:0004674; F:GO:0005524; P:GO:0006468; C:GO:0016021	F:protein serine/threonine kinase activity; F:ATP binding; P:protein phosphorylation; C:integral component of membrane	EC:2.7.1; EC:2.7; EC:2	Transferring phosphorus-containing groups; Transferring phosphorus-containing groups; Transferases	-	-	-	-	-
HORVU.MOREX.r3.6HG0617440.1	0	0	11.4922	11.23	5.68053	0	11.3611	Inf	Inf	0.0331197	0.212742	hypothetical protein D1007_19295	387	20	9.20E-74	68.35	1	F:GO:0003676	F:nucleic acid binding	-	-	-	-	-	-	-
HORVU.MOREX.r3.5HG0462990.1	69.1015	37.0758	214.521	308.022	157.18	53.0887	261.271	4.92141	2.29907	0.00761862	0.0827904	predicted protein	1173	20	0	93.8	4	F:GO:0000149; C:GO:0000323; C:GO:0005768; P:GO:0035493	F:SNARE binding; C:lytic vacuole; C:endosome; P:SNARE complex assembly	-	-	-	-	-	K21249	-
HORVU.MOREX.r3.7HG0672910.1	3.6053	2.05977	16.2806	51.3369	18.3206	2.83253	33.8088	11.9359	3.57723	0.033325	0.213533	putative transposase	600	20	1.27E-109	83.14	-	-	-	-	-	-	-	-	-	-
HORVU.MOREX.r3.7HG0708120.1	240.954	170.961	31.6035	65.7755	127.323	205.957	48.6895	0.236406	-2.08066	0.00523209	0.0634697	high mobility group B protein 7-like	648	20	4.97E-69	81.18	3	F:GO:0003677; C:GO:0005634; P:GO:0010197	F:DNA binding; C:nucleus; P:polar nucleus fusion	-	-	-	-	-	-	-
HORVU.MOREX.r3.4HG0402850.1	0	2.05977	9.57681	32.0856	10.9305	1.02988	20.8312	20.2268	4.33819	0.0295541	0.199426	Werner syndrome ATP-dependent helicase-like	660	20	4.24E-125	70.39	3	F:GO:0003676; F:GO:0008408; P:GO:0090305	F:nucleic acid binding; F:3'-5' exonuclease activity; P:nucleic acid phosphodiester bond hydrolysis	EC:3.1; EC:3	Acting on ester bonds; Hydrolases	-	-	-	-	-
HORVU.MOREX.r3.4HG0409380.1	4.20618	10.2988	36.3919	44.9198	23.9542	7.25251	40.6559	5.60577	2.48691	0.0442235	0.251153	boron transporter	2001	20	0	98.28	6	F:GO:0005452; C:GO:0005886; P:GO:0015698; C:GO:0016021; P:GO:0050801; P:GO:0055085	F:solute:inorganic anion antiporter activity; C:plasma membrane; P:inorganic anion transport; C:integral component of membrane; P:ion homeostasis; P:transmembrane transport	EC:7	n/a	-	-	-	-	-
HORVU.MOREX.r3.4HG0418530.1	1153.69	943.373	4639.97	3898.4	2658.86	1048.53	4269.18	4.07157	2.02559	0.0395322	0.235295	chaperone protein ClpB2, chloroplastic	2913	20	0	98.96	5	F:GO:0005524; C:GO:0009507; F:GO:0016887; P:GO:0034605; P:GO:0042026	F:ATP binding; C:chloroplast; F:ATP hydrolysis activity; P:cellular response to heat; P:protein refolding	EC:3.6.1; EC:3.6; EC:3; EC:3.6.1.15	Acting on acid anhydrides; Acting on acid anhydrides; Hydrolases; Nucleoside-triphosphate phosphatase	-	-	-	K03695	-
HORVU.MOREX.r3.2HG0119630.1	1.20177	0	15.3229	43.3156	14.9601	0.600883	29.3192	48.7936	5.60862	0.00746193	0.0814413	peroxidase 2-like	1047	20	0	82.68	8	F:GO:0004601; C:GO:0005576; P:GO:0006979; C:GO:0009505; F:GO:0020037; P:GO:0042744; F:GO:0046872; P:GO:0098869	F:peroxidase activity; C:extracellular region; P:response to oxidative stress; C:plant-type cell wall; F:heme binding; P:hydrogen peroxide catabolic process; F:metal ion binding; P:cellular oxidant detoxification	EC:1.11; EC:1; EC:1.11.1	Acting on a peroxide as acceptor; Oxidoreductases; Acting on a peroxide as acceptor	-	-	-	K00430	Metabolic pathways; Biosynthesis of secondary metabolites; Phenylpropanoid biosynthesis;
HORVU.MOREX.r3.6HG0615130.1	25.2371	29.8666	264.32	356.15	168.893	27.5518	310.235	11.26	3.49314	3.29E-05	0.00115325	transcription factor TCP14-like	1209	20	2.70E-161	88.76	10	F:GO:0000976; F:GO:0003700; C:GO:0005634; P:GO:0006355; P:GO:0009735; P:GO:0009737; P:GO:0009739; P:GO:0010029; P:GO:0010229; P:GO:0031347	F:transcription cis-regulatory region binding; F:DNA-binding transcription factor activity; C:nucleus; P:regulation of DNA-templated transcription; P:response to cytokinin; P:response to abscisic acid; P:response to gibberellin; P:regulation of seed germination; P:inflorescence development; P:regulation of defense response	-	-	-	-	-	-	-
HORVU.MOREX.r3.5HG0467200.1	4.80706	2.05977	80.4452	202.139	72.3628	3.43341	141.292	41.1521	5.36289	1.44E-06	8.75E-05	caffeoylshikimate esterase-like	900	20	0	94.62	2	C:GO:0016020; F:GO:0016298	C:membrane; F:lipase activity	EC:3.1; EC:3; EC:3.1.1	Acting on ester bonds; Hydrolases; Acting on ester bonds	-	-	-	K18368	Metabolic pathways; Biosynthesis of secondary metabolites; Phenylpropanoid biosynthesis;
HORVU.MOREX.r3.3HG0284920.1	3.6053	0	125.456	187.701	79.1906	1.80265	156.578	86.8603	6.44062	3.01E-08	3.62E-06	transposase family protein	363	20	1.53E-57	82.52	2	F:GO:0003676; P:GO:0015074	F:nucleic acid binding; P:DNA integration	-	-	-	-	-	-	-
HORVU.MOREX.r3.4HG0367850.1	0	0	45.9687	77.0054	30.7435	0	61.4871	Inf	Inf	2.36E-06	0.000131478	hypothetical protein ZWY2020_032988, partial	705	20	1.27E-124	94.27	-	-	-	-	-	-	-	-	-	-
HORVU.MOREX.r3.6HG0603110.1	0	0	21.069	36.8984	14.4919	0	28.9837	Inf	Inf	0.0010053	0.0181026	hypothetical protein D1007_32356	663	20	1.30E-138	90.94	-	-	-	-	-	-	-	-	-	-
HORVU.MOREX.r3.2HG0105420.1	206.704	214.216	22.9844	49.7327	123.409	210.46	36.3585	0.172758	-2.53318	0.00123139	0.0214437	proline-rich protein 4-like	1026	20	8.05E-179	94.93	1	C:GO:0016021	C:integral component of membrane	-	-	-	-	-	-	-
HORVU.MOREX.r3.4HG0332830.1	0	0	9.57681	14.4385	6.00383	0	12.0077	Inf	Inf	0.0316049	0.207335	uncharacterized protein LOC123450972	1575	20	0	74.43	-	-	-	-	-	-	-	-	-	-
HORVU.MOREX.r3.2HG0106400.1	0.600883	0	4.78841	32.0856	9.36872	0.300441	18.437	61.3664	5.93938	0.0289116	0.197038	wax ester synthase/diacylglycerol acyltransferase 11-like	1506	20	0	70.06	2	C:GO:0016020; F:GO:0016746	C:membrane; F:acyltransferase activity	EC:2.3; EC:2	Acyltransferases; Transferases	-	-	-	-	-
HORVU.MOREX.r3.5HG0455000.1	55.8821	58.7034	2729.39	4772.73	1904.18	57.2927	3751.06	65.4719	6.0328	8.52E-08	8.33E-06	2-carboxy-1,4-naphthoquinone phytyltransferase, chloroplastic-like isoform X2	627	20	2.76E-88	92.33	6	F:GO:0004659; C:GO:0009507; P:GO:0009772; P:GO:0010236; C:GO:0016021; P:GO:0042372	F:prenyltransferase activity; C:chloroplast; P:photosynthetic electron transport in photosystem II; P:plastoquinone biosynthetic process; C:integral component of membrane; P:phylloquinone biosynthetic process	EC:2.5.1; EC:2	Transferring alkyl or aryl groups, other than methyl groups; Transferases	-	-	-	K23094	Metabolic pathways; Biosynthesis of secondary metabolites; Biosynthesis of cofactors; Ubiquinone and other terpenoid-quinone biosynthesis;
HORVU.MOREX.r3.6HG0547420.1	4.80706	0	67.9954	91.4439	41.0616	2.40353	79.7197	33.1677	5.05171	9.58E-05	0.00280429	predicted protein	393	20	1.12E-52	78.2	1	C:GO:0016021	C:integral component of membrane	-	-	-	-	-	-	-
HORVU.MOREX.r3.1HG0094150.1	0	0	13.4075	25.6685	9.769	0	19.538	Inf	Inf	0.00665211	0.075244	calmodulin-like protein 3	561	20	3.62E-132	91.26	2	F:GO:0005509; C:GO:0016021	F:calcium ion binding; C:integral component of membrane	-	-	-	-	-	-	-
HORVU.MOREX.r3.2HG0160980.1	0	0	10.5345	11.23	5.44111	0	10.8822	Inf	Inf	0.0377099	0.229149	L10-interacting MYB domain-containing protein-like	336	20	5.26E-45	84.34	-	-	-	-	-	-	-	-	-	-
HORVU.MOREX.r3.2HG0209710.1	0	2.05977	17.2383	22.4599	10.4395	1.02988	19.8491	19.2731	4.26852	0.0265195	0.187905	fiber protein fb34	393	20	5.07E-76	79.49	2	C:GO:0016020; C:GO:0016021	C:membrane; C:integral component of membrane	-	-	-	-	-	-	-
HORVU.MOREX.r3.3HG0304680.1	1268.46	1649.87	352.427	192.514	865.819	1459.17	272.47	0.18673	-2.42098	0.00638729	0.0731598	fructose-bisphosphate aldolase 1, cytoplasmic-like	1077	20	0	98.81	4	F:GO:0004332; C:GO:0005829; P:GO:0006096; P:GO:0030388	F:fructose-bisphosphate aldolase activity; C:cytosol; P:glycolytic process; P:fructose 1,6-bisphosphate metabolic process	EC:4.1.2; EC:4.1; EC:4.1.2.13; EC:4	Carbon-carbon lyases; Carbon-carbon lyases; Fructose-bisphosphate aldolase; Lyases	-	-	-	K01623	Metabolic pathways; Biosynthesis of secondary metabolites; Microbial metabolism in diverse environments; Carbon metabolism; Biosynthesis of amino acids; Glycolysis_Gluconeogenesis; Pentose phosphate pathway; Fructose and mannose metabolism; Carbon fixation in photosynthetic organisms;
HORVU.MOREX.r3.3HG0223260.1	0	0	12.4499	11.23	5.91995	0	11.8399	Inf	Inf	0.0290886	0.197492	expansin-A24-like	795	20	0	96.47	3	C:GO:0005576; P:GO:0009664; C:GO:0016020	C:extracellular region; P:plant-type cell wall organization; C:membrane	-	-	-	-	-	-	-
HORVU.MOREX.r3.4HG0415760.1	0	0	18.1959	6.41712	6.15327	0	12.3065	Inf	Inf	0.0214054	0.164753	predicted protein	660	20	6.15E-129	72.3	3	F:GO:0003676; F:GO:0008408; P:GO:0090305	F:nucleic acid binding; F:3'-5' exonuclease activity; P:nucleic acid phosphodiester bond hydrolysis	EC:3.1; EC:3	Acting on ester bonds; Hydrolases	-	-	-	-	-
HORVU.MOREX.r3.6HG0587770.1	3.6053	5.14942	59.3762	49.7327	29.4659	4.37736	54.5545	12.4629	3.63957	0.0028224	0.0406782	retrotransposon protein	867	20	1.26E-152	83.12	-	-	-	-	-	-	-	-	-	-
HORVU.MOREX.r3.5HG0503440.1	0	0	8.61913	12.8342	5.36334	0	10.7267	Inf	Inf	0.042105	0.243846	putative receptor-like protein kinase At3g47110	3159	20	0	89.55	4	F:GO:0004672; F:GO:0005524; P:GO:0006468; C:GO:0016021	F:protein kinase activity; F:ATP binding; P:protein phosphorylation; C:integral component of membrane	EC:2.7.1; EC:2.7; EC:2	Transferring phosphorus-containing groups; Transferring phosphorus-containing groups; Transferases	-	-	-	-	-
HORVU.MOREX.r3.7HG0686440.1	0	0	34.4765	52.9412	21.8544	0	43.7089	Inf	Inf	5.34E-05	0.00172238	putative methionyl-tRNA synthetase	708	20	1.10E-114	94.54	-	-	-	-	-	-	-	-	-	-
HORVU.MOREX.r3.5HG0529390.1	0	0	20.1113	28.877	12.2471	0	24.4942	Inf	Inf	0.00221256	0.0337265	la-related protein 4B-like	1011	20	0	62.45	-	-	-	-	-	-	-	-	-	-
HORVU.MOREX.r3.2HG0211570.1	0	0	10.5345	9.62568	5.04004	0	10.0801	Inf	Inf	0.0438861	0.249841	probable alpha-glucosidase Os06g0675700	2064	20	0	92.59	3	P:GO:0005975; F:GO:0030246; F:GO:0090599	P:carbohydrate metabolic process; F:carbohydrate binding; F:alpha-glucosidase activity	EC:3.2; EC:3.2.1.20; EC:3; EC:3.2.1	Glycosylases; Alpha-glucosidase; Hydrolases; Glycosylases	-	-	-	-	-
HORVU.MOREX.r3.7HG0745470.1	0	0	7.66145	14.4385	5.52499	0	11.05	Inf	Inf	0.0412389	0.241449	TNF receptor-associated factor 5	1071	20	0	93.78	2	C:GO:0005737; F:GO:0008270	C:cytoplasm; F:zinc ion binding	-	-	-	-	-	-	-
HORVU.MOREX.r3.2HG0167970.1	0	0	17.2383	11.23	7.11706	0	14.2341	Inf	Inf	0.0153923	0.134731	cysteine synthase-like	984	20	0	94.26	3	F:GO:0004124; C:GO:0005737; P:GO:0006535	F:cysteine synthase activity; C:cytoplasm; P:cysteine biosynthetic process from serine	EC:2.5.1; EC:2.5.1.47; EC:2	Transferring alkyl or aryl groups, other than methyl groups; Cysteine synthase; Transferases	-	-	-	K01738	Metabolic pathways; Biosynthesis of secondary metabolites; Microbial metabolism in diverse environments; Carbon metabolism; Biosynthesis of amino acids; Sulfur metabolism; Cysteine and methionine metabolism;
HORVU.MOREX.r3.5HG0528730.1	0	0	2.87304	38.5027	10.3439	0	20.6879	Inf	Inf	0.00786624	0.0848673	zinc finger MYM-type protein 1-like	1320	20	0	85.39	1	F:GO:0046983	F:protein dimerization activity	-	-	-	-	-	-	-
HORVU.MOREX.r3.7HG0664300.1	0	0	13.4075	11.23	6.15937	0	12.3187	Inf	Inf	0.0255599	0.184044	putative laccase-9	1716	20	0	96.13	4	F:GO:0005507; P:GO:0046274; C:GO:0048046; F:GO:0052716	F:copper ion binding; P:lignin catabolic process; C:apoplast; F:hydroquinone:oxygen oxidoreductase activity	EC:1.10; EC:1; EC:1.10.3; EC:1.10.3.2	Acting on diphenols and related substances as donors; Oxidoreductases; Acting on diphenols and related substances as donors; Laccase	-	-	-	-	-
HORVU.MOREX.r3.1HG0023630.1	0	0	2.87304	24.0642	6.73431	0	13.4686	Inf	Inf	0.031394	0.206642	hypothetical protein ZWY2020_032988, partial	774	20	3.65E-155	96.86	-	-	-	-	-	-	-	-	-	-
HORVU.MOREX.r3.3HG0305800.1	249.967	224.515	76.6145	33.6899	146.197	237.241	55.1522	0.232473	-2.10486	0.0127764	0.118882	ribonuclease 2-like	852	20	1.64E-179	94.25	5	F:GO:0003723; C:GO:0005576; P:GO:0006401; F:GO:0033897; P:GO:0090502	F:RNA binding; C:extracellular region; P:RNA catabolic process; F:ribonuclease T2 activity; P:RNA phosphodiester bond hydrolysis, endonucleolytic	EC:3.1; EC:3; EC:4; EC:4.6; EC:4.6.1.19	Acting on ester bonds; Hydrolases; Lyases; Phosphorus-oxygen lyases; n/a	-	-	-	-	-
HORVU.MOREX.r3.4HG0380710.1	266.191	221.425	58.4186	56.1498	150.546	243.808	57.2842	0.234956	-2.08954	0.00799179	0.0858027	calmodulin-7	450	20	7.61E-103	100	11	F:GO:0004683; F:GO:0005509; P:GO:0005513; F:GO:0005515; C:GO:0005634; C:GO:0005886; P:GO:0006468; P:GO:0010099; C:GO:0016021; F:GO:0032440; P:GO:0050832	F:calmodulin-dependent protein kinase activity; F:calcium ion binding; P:detection of calcium ion; F:protein binding; C:nucleus; C:plasma membrane; P:protein phosphorylation; P:regulation of photomorphogenesis; C:integral component of membrane; F:2-alkenal reductase [NAD(P)+] activity; P:defense response to fungus	EC:2.7.1; EC:1.3.1.74; EC:1.3; EC:1; EC:2.7; EC:2; EC:2.7.11.17; EC:1.3.1	Transferring phosphorus-containing groups; 2-alkenal reductase (NAD(P)(+)); Acting on the CH-CH group of donors; Oxidoreductases; Transferring phosphorus-containing groups; Transferases; Calcium/calmodulin-dependent protein kinase; Acting on the CH-CH group of donors	-	-	-	K02183	MAPK signaling pathway - plant; Ras signaling pathway; Rap1 signaling pathway; Calcium signaling pathway; cAMP signaling pathway; cGMP-PKG signaling pathway; Cellular senescence; Glucagon signaling pathway; Oxytocin signaling pathway; Adrenergic signaling in cardiomyocytes; Neurotrophin signaling pathway; Phototransduction; Plant-pathogen interaction;
HORVU.MOREX.r3.2HG0120470.1	1.20177	0	22.9844	25.6685	12.4636	0.600883	24.3264	40.4845	5.3393	0.0119937	0.113845	peroxidase 2-like	1266	20	0	95.22	7	F:GO:0004601; C:GO:0005576; P:GO:0006979; F:GO:0020037; P:GO:0042744; F:GO:0046872; P:GO:0098869	F:peroxidase activity; C:extracellular region; P:response to oxidative stress; F:heme binding; P:hydrogen peroxide catabolic process; F:metal ion binding; P:cellular oxidant detoxification	EC:1.11; EC:1; EC:1.11.1	Acting on a peroxide as acceptor; Oxidoreductases; Acting on a peroxide as acceptor	-	-	-	K00430	Metabolic pathways; Biosynthesis of secondary metabolites; Phenylpropanoid biosynthesis;
HORVU.MOREX.r3.6HG0544570.1	0	0	9.57681	20.8556	7.60811	0	15.2162	Inf	Inf	0.017022	0.142973	D-3-phosphoglycerate dehydrogenase, chloroplastic	1089	20	0	82.89	-	-	-	-	-	-	-	-	-	-
HORVU.MOREX.r3.6HG0613690.1	331.086	326.473	70.8684	67.3797	198.952	328.78	69.1241	0.210244	-2.24986	0.0042136	0.0542895	annexin D7-like	948	20	0	96.18	4	F:GO:0005509; F:GO:0005544; C:GO:0005737; P:GO:0006950	F:calcium ion binding; F:calcium-dependent phospholipid binding; C:cytoplasm; P:response to stress	-	-	-	-	-	-	-
HORVU.MOREX.r3.2HG0199290.1	6.60971	4.11953	95.7681	157.219	65.9292	5.36462	126.494	23.5793	4.55945	1.76E-05	0.000689128	predicted protein	774	20	3.88E-158	85.36	1	P:GO:0032196	P:transposition	-	-	-	-	-	-	-
HORVU.MOREX.r3.3HG0255050.1	22.2327	20.5977	91.9374	147.594	70.5904	21.4152	119.766	5.59256	2.48351	0.00878766	0.0915651	cyclic dof factor 2-like	1602	20	0	91.04	4	F:GO:0003677; F:GO:0003700; C:GO:0005634; P:GO:0006355	F:DNA binding; F:DNA-binding transcription factor activity; C:nucleus; P:regulation of DNA-templated transcription	-	-	-	-	-	-	-
HORVU.MOREX.r3.4HG0341240.1	10.215	14.4184	53.6302	77.0054	38.8172	12.3167	65.3178	5.30319	2.40686	0.0261013	0.186661	hypothetical protein D1007_18095	1212	20	0	76.33	-	-	-	-	-	-	-	-	-	-
HORVU.MOREX.r3.7HG0726880.1	18.0265	12.3586	78.5299	51.3369	40.063	15.1925	64.9334	4.27403	2.0956	0.0409539	0.240779	26S proteasome non-ATPase regulatory subunit 14 homolog	912	20	0	86.33	5	C:GO:0008541; P:GO:0016579; P:GO:0043161; F:GO:0070628; F:GO:0140492	C:proteasome regulatory particle, lid subcomplex; P:protein deubiquitination; P:proteasome-mediated ubiquitin-dependent protein catabolic process; F:proteasome binding; F:metal-dependent deubiquitinase activity	EC:3.4; EC:3	Acting on peptide bonds (peptidases); Hydrolases	-	-	-	K03030	Proteasome;
HORVU.MOREX.r3.3HG0311730.1	162.839	173.02	28.7304	43.3156	101.976	167.93	36.023	0.214512	-2.22087	0.00613906	0.0711307	probable protein S-acyltransferase 7	1221	20	0	96.63	6	C:GO:0005783; C:GO:0005794; P:GO:0006612; C:GO:0016021; P:GO:0018230; F:GO:0019706	C:endoplasmic reticulum; C:Golgi apparatus; P:protein targeting to membrane; C:integral component of membrane; P:peptidyl-L-cysteine S-palmitoylation; F:protein-cysteine S-palmitoyltransferase activity	EC:2.3; EC:2; EC:2.3.1.225; EC:2.3.1	Acyltransferases; Transferases; Protein S-acyltransferase; Acyltransferases	-	-	-	-	-
HORVU.MOREX.r3.3HG0283050.1	0	2.05977	16.2806	19.2514	9.39793	1.02988	17.766	17.2505	4.10856	0.037149	0.227012	RNA-binding protein 34	285	20	2.26E-41	93.45	1	F:GO:0003723	F:RNA binding	-	-	-	-	-	-	-
HORVU.MOREX.r3.6HG0540040.1	76.913	100.929	5628.29	9843.86	3912.5	88.9208	7736.08	86.9996	6.44294	4.67E-07	3.51E-05	protein ENHANCED DISEASE RESISTANCE 2-like isoform X1	2445	20	0	97.25	4	F:GO:0003677; C:GO:0005634; C:GO:0005783; F:GO:0008289	F:DNA binding; C:nucleus; C:endoplasmic reticulum; F:lipid binding	-	-	-	-	-	-	-
HORVU.MOREX.r3.4HG0374510.1	3.00441	2.05977	48.8417	77.0054	32.7278	2.53209	62.9236	24.8505	4.6352	0.000468323	0.00990045	predicted protein	669	20	1.31E-153	91.98	1	P:GO:0032196	P:transposition	-	-	-	-	-	-	-
HORVU.MOREX.r3.3HG0297030.1	0	0	22.9844	22.4599	11.3611	0	22.7221	Inf	Inf	0.00274477	0.0398501	hypothetical protein ZWY2020_001281	798	20	1.40E-170	84.05	-	-	-	-	-	-	-	-	-	-
HORVU.MOREX.r3.3HG0292430.1	0	1.02988	3.83073	28.877	8.43441	0.514942	16.3539	31.7587	4.98908	0.0420058	0.243846	hypothetical protein ZWY2020_005234	363	12	1.52E-77	63.85	2	C:GO:0016020; C:GO:0016021	C:membrane; C:integral component of membrane	-	-	-	-	-	-	-
HORVU.MOREX.r3.6HG0617100.1	10.215	15.4483	148.441	123.53	74.4083	12.8316	135.985	10.5976	3.40567	0.000156296	0.00418585	7-deoxyloganetin glucosyltransferase-like	1458	20	0	95.83	1	F:GO:0008194	F:UDP-glycosyltransferase activity	EC:2.4; EC:2	Glycosyltransferases; Transferases	-	-	-	-	-
HORVU.MOREX.r3.7HG0710900.1	1.20177	0	46.9264	65.7755	28.4759	0.600883	56.3509	93.7803	6.55121	6.30E-05	0.00199253	putative LRR receptor-like serine/threonine-protein kinase	1554	20	0	87.11	-	-	-	-	-	-	-	-	-	-
HORVU.MOREX.r3.2HG0169580.1	0	0	7.66145	17.6471	6.32713	0	12.6543	Inf	Inf	0.0301232	0.201313	hypothetical protein ZWY2020_045646	591	20	3.17E-91	94.28	-	-	-	-	-	-	-	-	-	-
HORVU.MOREX.r3.3HG0295350.1	25.2371	27.8069	96.7258	210.161	89.9826	26.522	153.443	5.78552	2.53245	0.00577038	0.0678725	hypothetical protein D1007_42300	1458	20	0	81.63	-	-	-	-	-	-	-	-	-	-
HORVU.MOREX.r3.1HG0052770.1	0	0	10.5345	48.1284	14.6657	0	29.3314	Inf	Inf	0.00131377	0.022523	predicted protein	693	20	1.94E-130	88.72	1	P:GO:0032196	P:transposition	-	-	-	-	-	-	-
HORVU.MOREX.r3.2HG0111390.1	0.600883	0	25.8574	40.107	16.6413	0.300441	32.9822	109.779	6.77846	0.00149904	0.0249474	predicted protein	693	20	2.81E-137	87.44	1	P:GO:0032196	P:transposition	-	-	-	-	-	-	-
HORVU.MOREX.r3.1HG0003050.1	678.396	881.58	37.3496	24.0642	405.348	779.988	30.7069	0.0393684	-4.66682	1.60E-07	1.45E-05	putative UDP-rhamnose:rhamnosyltransferase 1	1320	20	0	84.43	2	F:GO:0008194; C:GO:0043231	F:UDP-glycosyltransferase activity; C:intracellular membrane-bounded organelle	EC:2.4; EC:2	Glycosyltransferases; Transferases	-	-	-	-	-
HORVU.MOREX.r3.5HG0504010.1	0	0	16.2806	9.62568	6.47657	0	12.9531	Inf	Inf	0.0203084	0.159849	predicted protein	651	20	4.84E-144	72.93	3	F:GO:0003676; F:GO:0008408; P:GO:0090305	F:nucleic acid binding; F:3'-5' exonuclease activity; P:nucleic acid phosphodiester bond hydrolysis	EC:3.1; EC:3	Acting on ester bonds; Hydrolases	-	-	-	-	-
HORVU.MOREX.r3.5HG0534970.1	0	0	8.61913	16.0428	6.16548	0	12.331	Inf	Inf	0.0308576	0.204185	putative Trk system potassium uptake protein TrkH	372	17	1.84E-65	59.08	6	F:GO:0003677; P:GO:0006952; C:GO:0016020; C:GO:0016021; F:GO:0043531; F:GO:0046872	F:DNA binding; P:defense response; C:membrane; C:integral component of membrane; F:ADP binding; F:metal ion binding	-	-	-	-	-	-	-
HORVU.MOREX.r3.2HG0176580.1	0	0	18.1959	43.3156	15.3779	0	30.7557	Inf	Inf	0.000812142	0.0153534	hypothetical protein ZWY2020_055944	1500	20	0	71.58	-	-	-	-	-	-	-	-	-	-
HORVU.MOREX.r3.5HG0537510.1	0	0	5.74609	22.4599	7.0515	0	14.103	Inf	Inf	0.024517	0.179056	uncharacterized protein LOC123397464	1704	20	0	91.41	-	-	-	-	-	-	-	-	-	-
HORVU.MOREX.r3.2HG0206630.1	74.5094	74.1516	7.66145	16.0428	43.0913	74.3305	11.8521	0.159452	-2.64881	0.00875768	0.0914623	predicted protein	210	20	1.16E-42	93.51	-	-	-	-	-	-	-	-	-	-
HORVU.MOREX.r3.6HG0576810.1	1.80265	2.05977	38.3073	52.9412	23.7777	1.93121	45.6242	23.6247	4.56223	0.00187717	0.0297754	ribosomal protein S1	348	20	3.29E-72	89.9	2	C:GO:0005739; C:GO:0005840	C:mitochondrion; C:ribosome	-	-	-	-	-	-	-
HORVU.MOREX.r3.7HG0743510.1	0	0	6.70377	24.0642	7.69199	0	15.384	Inf	Inf	0.0184477	0.150145	two-component response regulator ORR24-like	1827	20	0	70.03	1	P:GO:0050794	P:regulation of cellular process	-	-	-	-	-	K14491	Plant hormone signal transduction;
HORVU.MOREX.r3.7HG0715100.1	0	0	11.4922	9.62568	5.27946	0	10.5589	Inf	Inf	0.038517	0.23209	predicted protein	651	20	7.99E-135	72.77	3	F:GO:0003676; F:GO:0008408; P:GO:0090305	F:nucleic acid binding; F:3'-5' exonuclease activity; P:nucleic acid phosphodiester bond hydrolysis	EC:3.1; EC:3	Acting on ester bonds; Hydrolases	-	-	-	-	-
HORVU.MOREX.r3.7HG0724080.1	2.40353	4.11953	36.3919	44.9198	21.9587	3.26153	40.6559	12.4653	3.63984	0.00930784	0.09556	predicted protein	1944	20	0	87.83	-	-	-	-	-	-	-	-	-	-
HORVU.MOREX.r3.1HG0067790.1	0	2.05977	21.069	43.3156	16.6111	1.02988	32.1923	31.2582	4.96616	0.00406219	0.0527915	ribosomal protein S1	348	20	6.03E-71	89.81	2	C:GO:0005739; C:GO:0005840	C:mitochondrion; C:ribosome	-	-	-	-	-	-	-
HORVU.MOREX.r3.3HG0307330.1	1.20177	2.05977	72.7838	91.4439	41.8723	1.63077	82.1139	50.3529	5.654	8.46E-06	0.000375242	predicted protein	693	20	3.42E-135	87.5	1	P:GO:0032196	P:transposition	-	-	-	-	-	-	-
HORVU.MOREX.r3.3HG0302650.1	0	0	15.3229	20.8556	9.04463	0	18.0893	Inf	Inf	0.00812923	0.086856	retrotransposon protein, putative, unclassified	606	20	2.00E-95	77.34	1	F:GO:0046872	F:metal ion binding	-	-	-	-	-	-	-
HORVU.MOREX.r3.5HG0480440.1	10.8159	13.3885	54.5878	85.0268	40.9548	12.1022	69.8073	5.76816	2.52811	0.0198802	0.157502	leucine-rich repeat receptor-like protein kinase PEPR2	3450	20	0	91.19	4	F:GO:0004672; F:GO:0005524; P:GO:0006468; C:GO:0016021	F:protein kinase activity; F:ATP binding; P:protein phosphorylation; C:integral component of membrane	EC:2.7.1; EC:2.7; EC:2	Transferring phosphorus-containing groups; Transferring phosphorus-containing groups; Transferases	-	-	-	-	-
HORVU.MOREX.r3.1HG0063310.1	3.00441	2.05977	147.483	282.353	108.725	2.53209	214.918	84.8777	6.40731	2.21E-09	4.13E-07	protein FAR1-RELATED SEQUENCE 5-like	909	20	0	76.58	-	-	-	-	-	-	-	-	-	-
HORVU.MOREX.r3.4HG0369570.1	2421.56	2073.16	363.919	309.626	1292.06	2247.36	336.772	0.149853	-2.73838	0.00238495	0.0357276	UDP-arabinopyranose mutase 1	1116	20	0	98.69	8	F:GO:0005515; C:GO:0005794; C:GO:0005829; P:GO:0009832; F:GO:0016740; P:GO:0033356; F:GO:0052691; P:GO:0071555	F:protein binding; C:Golgi apparatus; C:cytosol; P:plant-type cell wall biogenesis; F:transferase activity; P:UDP-L-arabinose metabolic process; F:UDP-arabinopyranose mutase activity; P:cell wall organization	EC:5.4; EC:2; EC:5; EC:5.4.99.30	Intramolecular transferases; Transferases; Isomerases; UDP-arabinopyranose mutase	-	-	-	K13379	Metabolic pathways; Biosynthesis of nucleotide sugars; Amino sugar and nucleotide sugar metabolism;
HORVU.MOREX.r3.7HG0670040.1	7.21059	8.23907	55.5455	52.9412	30.9841	7.72483	54.2434	7.02195	2.81187	0.0153478	0.134668	GDSL esterase/lipase At5g37690-like	1488	20	0	93.32	4	C:GO:0016021; F:GO:0016788; P:GO:0044238; P:GO:0044260	C:integral component of membrane; F:hydrolase activity, acting on ester bonds; P:primary metabolic process; P:cellular macromolecule metabolic process	EC:3.1; EC:3	Acting on ester bonds; Hydrolases	-	-	-	-	-
HORVU.MOREX.r3.5HG0432030.1	418.815	291.457	76.6145	78.6097	216.374	355.136	77.6121	0.218542	-2.19402	0.00410034	0.0531953	protein tesmin/TSO1-like CXC 2	2301	20	0	95.42	3	F:GO:0003700; C:GO:0005634; P:GO:0006355	F:DNA-binding transcription factor activity; C:nucleus; P:regulation of DNA-templated transcription	-	-	-	-	-	-	-
HORVU.MOREX.r3.2HG0194880.1	49.2724	52.5241	274.855	436.364	203.254	50.8982	355.609	6.98668	2.80461	0.000699795	0.0136914	transcription factor GTE2-like isoform X1	1407	20	0	92.83	-	-	-	-	-	-	-	-	-	-
HORVU.MOREX.r3.1HG0092660.1	13.2194	13.3885	74.6991	64.1712	41.3696	13.304	69.4352	5.21914	2.38381	0.0205392	0.160856	cysteine-rich receptor-like protein kinase 6 isoform X2	2004	20	0	93.08	6	F:GO:0003676; F:GO:0004672; F:GO:0005524; P:GO:0006468; F:GO:0008270; C:GO:0016021	F:nucleic acid binding; F:protein kinase activity; F:ATP binding; P:protein phosphorylation; F:zinc ion binding; C:integral component of membrane	EC:2.7.1; EC:2.7; EC:2	Transferring phosphorus-containing groups; Transferring phosphorus-containing groups; Transferases	-	-	-	-	-
HORVU.MOREX.r3.1HG0004260.1	3.6053	4.11953	37.3496	22.4599	16.8836	3.86241	29.9047	7.7425	2.9528	0.0423112	0.24481	uncharacterized protein LOC123395188	1101	20	0	91.45	-	-	-	-	-	-	-	-	-	-
HORVU.MOREX.r3.4HG0405930.1	3.6053	0	54.5878	70.5883	32.1954	1.80265	62.5881	34.7201	5.1177	0.00028518	0.00661748	probable leucine-rich repeat receptor-like protein kinase At2g28990	1566	20	0	93.98	-	-	-	-	-	-	-	-	-	-
HORVU.MOREX.r3.7HG0723140.1	0	0	19.1536	22.4599	10.4034	0	20.8068	Inf	Inf	0.00435228	0.0556371	probable glucomannan 4-beta-mannosyltransferase 9	1548	20	0	96.4	3	C:GO:0000139; C:GO:0016021; P:GO:0071555	C:Golgi membrane; C:integral component of membrane; P:cell wall organization	-	-	-	-	-	-	-
HORVU.MOREX.r3.4HG0389440.1	0	0	15.3229	12.8342	7.03928	0	14.0786	Inf	Inf	0.016987	0.142967	uncharacterized protein LOC123446666	1566	20	0	89.69	-	-	-	-	-	-	-	-	-	-
HORVU.MOREX.r3.2HG0131660.1	0	0	77.5722	65.7755	35.8369	0	71.6738	Inf	Inf	2.85E-07	2.32E-05	hypothetical protein ZWY2020_032988, partial	774	20	1.12E-152	94.83	-	-	-	-	-	-	-	-	-	-
HORVU.MOREX.r3.2HG0175150.1	7.81147	7.20919	134.075	229.412	94.627	7.51033	181.744	24.1992	4.59689	2.29E-06	0.00012843	putative transposase	1422	20	0	86.52	1	F:GO:0003676	F:nucleic acid binding	-	-	-	-	-	-	-
HORVU.MOREX.r3.3HG0314950.1	0	0	26.8151	44.9198	17.9337	0	35.8675	Inf	Inf	0.000260764	0.00618862	vicilin-like seed storage protein At2g18540	555	20	1.21E-45	95.52	-	-	-	-	-	-	-	-	-	-
HORVU.MOREX.r3.1HG0012880.1	0	0	14.3652	22.4599	9.20628	0	18.4126	Inf	Inf	0.00791845	0.0852102	Anthocyanin 3'-O-beta-glucosyltransferase	405	20	5.20E-81	90.91	-	-	-	-	-	-	-	-	-	-
HORVU.MOREX.r3.3HG0296120.1	1.20177	4.11953	57.4609	36.8984	24.9202	2.66065	47.1797	17.7324	4.14831	0.00143247	0.0240421	NDR1/HIN1-like protein 13	879	20	6.87E-163	94.7	1	C:GO:0016021	C:integral component of membrane	-	-	-	-	-	-	-
HORVU.MOREX.r3.2HG0178120.1	21.6318	18.5379	92.8951	134.759	66.9561	20.0848	113.827	5.66732	2.50267	0.0088424	0.0919889	retrotransposon protein, putative, unclassified	2268	20	0	67.57	3	F:GO:0005488; P:GO:0090304; F:GO:0140640	F:binding; P:nucleic acid metabolic process; F:catalytic activity, acting on a nucleic acid	-	-	-	-	-	-	-
HORVU.MOREX.r3.5HG0462130.1	69.7024	59.7332	214.521	357.754	175.428	64.7178	286.137	4.42131	2.14447	0.0108246	0.106056	dual specificity protein phosphatase 12-like	1104	20	0	95.38	3	F:GO:0004725; F:GO:0008138; P:GO:0035335	F:protein tyrosine phosphatase activity; F:protein tyrosine/serine/threonine phosphatase activity; P:peptidyl-tyrosine dephosphorylation	EC:3.1; EC:3.1.3.48; EC:3; EC:3.1.3	Acting on ester bonds; Protein-tyrosine-phosphatase; Hydrolases; Acting on ester bonds	-	-	-	-	-
HORVU.MOREX.r3.7HG0641050.1	36.6538	63.8528	3.83073	3.20856	26.8865	50.2533	3.51964	0.070038	-3.83572	0.0053697	0.0646172	60S ribosomal protein L22-like	750	20	4.49E-68	85.11	-	-	-	-	-	-	-	-	-	-
HORVU.MOREX.r3.5HG0425520.1	4.80706	2.05977	24.8997	62.5669	23.5834	3.43341	43.7333	12.7376	3.67102	0.0145091	0.129362	probable serine/threonine protein kinase IRE isoform X1	3165	20	0	95.51	4	F:GO:0004674; F:GO:0005524; P:GO:0018105; P:GO:0035556	F:protein serine/threonine kinase activity; F:ATP binding; P:peptidyl-serine phosphorylation; P:intracellular signal transduction	EC:2.7.1; EC:2.7; EC:2	Transferring phosphorus-containing groups; Transferring phosphorus-containing groups; Transferases	-	-	-	-	-
HORVU.MOREX.r3.1HG0094560.1	146.014	132.855	9.57681	16.0428	76.1223	139.435	12.8098	0.0918695	-3.44427	0.000161753	0.00428582	predicted protein	621	11	5.57E-114	72.45	-	-	-	-	-	-	-	-	-	-
HORVU.MOREX.r3.2HG0113520.1	43.8644	36.0459	7.66145	3.20856	22.6951	39.9552	5.435	0.136028	-2.87803	0.0414039	0.242022	universal stress protein YxiE-like	711	20	1.04E-118	87.19	-	-	-	-	-	-	-	-	-	-
HORVU.MOREX.r3.3HG0327530.1	0	2.05977	14.3652	25.6685	10.5234	1.02988	20.0168	19.436	4.28066	0.0284058	0.194901	predicted protein	387	20	6.02E-57	91.05	-	-	-	-	-	-	-	-	-	-
HORVU.MOREX.r3.1HG0055970.1	0.600883	2.05977	39.2649	57.7541	24.9199	1.33032	48.5095	36.4644	5.18842	0.000450709	0.00964209	Werner syndrome ATP-dependent helicase-like	540	20	1.38E-116	65.42	3	F:GO:0003676; F:GO:0008408; P:GO:0090305	F:nucleic acid binding; F:3'-5' exonuclease activity; P:nucleic acid phosphodiester bond hydrolysis	EC:3.1; EC:3	Acting on ester bonds; Hydrolases	-	-	-	-	-
HORVU.MOREX.r3.2HG0136760.1	2.40353	0	25.8574	48.1284	19.0973	1.20177	36.9929	30.7821	4.94402	0.00528558	0.0639327	mutator protein	558	20	6.23E-119	93.42	-	-	-	-	-	-	-	-	-	-
HORVU.MOREX.r3.7HG0651790.1	0	0	14.3652	12.8342	6.79986	0	13.5997	Inf	Inf	0.0192726	0.154746	3-ketoacyl-CoA synthase 6-like	1425	20	0	86.73	3	P:GO:0006633; C:GO:0016021; F:GO:0016747	P:fatty acid biosynthetic process; C:integral component of membrane; F:acyltransferase activity, transferring groups other than amino-acyl groups	EC:2.3; EC:2; EC:2.3.1	Acyltransferases; Transferases; Acyltransferases	-	-	-	K15397	Metabolic pathways; Biosynthesis of secondary metabolites; Plant-pathogen interaction;
HORVU.MOREX.r3.7HG0730020.1	0	0	65.1223	89.8397	38.7405	0	77.481	Inf	Inf	1.82E-07	1.61E-05	predicted protein	693	20	1.54E-137	85.81	1	P:GO:0032196	P:transposition	-	-	-	-	-	-	-
HORVU.MOREX.r3.1HG0046550.1	0.600883	0	42.138	36.8984	19.9093	0.300441	39.5182	131.534	7.03929	0.000339939	0.00764252	hypothetical protein ZWY2020_029357	576	20	1.16E-61	88.27	-	-	-	-	-	-	-	-	-	-
HORVU.MOREX.r3.7HG0709980.1	0	0	10.5345	14.4385	6.24325	0	12.4865	Inf	Inf	0.0276982	0.192437	hypothetical protein ZWY2020_021451, partial	774	20	8.86E-153	95.48	-	-	-	-	-	-	-	-	-	-
HORVU.MOREX.r3.2HG0170930.1	0.600883	2.05977	359.13	356.15	179.485	1.33032	357.64	268.837	8.07059	1.16E-13	3.63E-10	23.2 kDa heat shock protein-like	651	20	7.57E-111	87.39	8	P:GO:0006457; P:GO:0009408; P:GO:0009651; C:GO:0016021; P:GO:0042542; F:GO:0043621; F:GO:0051082; P:GO:0051259	P:protein folding; P:response to heat; P:response to salt stress; C:integral component of membrane; P:response to hydrogen peroxide; F:protein self-association; F:unfolded protein binding; P:protein complex oligomerization	-	-	-	-	-	K13993	-
HORVU.MOREX.r3.3HG0248440.1	82.9218	90.6298	27.7728	8.0214	52.3364	86.7758	17.8971	0.206245	-2.27757	0.0331953	0.213046	ras-related protein Rab7	624	20	4.38E-152	99.57	4	F:GO:0003924; F:GO:0005525; C:GO:0005774; P:GO:0015031	F:GTPase activity; F:GTP binding; C:vacuolar membrane; P:protein transport	EC:3.6.1; EC:3.6; EC:3; EC:3.6.1.15	Acting on acid anhydrides; Acting on acid anhydrides; Hydrolases; Nucleoside-triphosphate phosphatase	-	-	-	K07897	Endocytosis; Autophagy - yeast; Salmonella infection;
HORVU.MOREX.r3.1HG0086420.1	16.8247	18.5379	165.679	304.813	126.464	17.6813	235.246	13.3048	3.73387	2.89E-05	0.00103106	retrotransposon protein, putative, unclassified	1740	20	1.58E-142	63.39	5	F:GO:0003676; F:GO:0003824; F:GO:0003964; P:GO:0006278; F:GO:0008270	F:nucleic acid binding; F:catalytic activity; F:RNA-directed DNA polymerase activity; P:RNA-templated DNA biosynthetic process; F:zinc ion binding	-	-	-	-	-	-	-
HORVU.MOREX.r3.5HG0451140.1	0	0	10.5345	11.23	5.44111	0	10.8822	Inf	Inf	0.0377099	0.229149	hypothetical protein ZWY2020_035937	309	20	1.00E-54	95.15	1	F:GO:0046983	F:protein dimerization activity	-	-	-	-	-	-	-
HORVU.MOREX.r3.7HG0674180.1	1.20177	0	42.138	36.8984	20.0595	0.600883	39.5182	65.7669	6.03929	0.000798407	0.0151319	protein FAR1-RELATED SEQUENCE 5-like	1266	20	0	76.72	-	-	-	-	-	-	-	-	-	-
HORVU.MOREX.r3.4HG0380340.1	2.40353	2.05977	31.6035	97.8611	33.482	2.23165	64.7323	29.0065	4.8583	0.000380155	0.00836632	protein FAR1-RELATED SEQUENCE 5-like	2520	20	0	75.22	2	C:GO:0016020; F:GO:0046872	C:membrane; F:metal ion binding	-	-	-	-	-	-	-
HORVU.MOREX.r3.4HG0348770.1	1.20177	2.05977	19.1536	35.2942	14.4273	1.63077	27.2239	16.6939	4.06125	0.0217867	0.166629	cbl-interacting protein kinase 13	711	20	3.02E-146	91.33	-	-	-	-	-	-	-	-	-	-
HORVU.MOREX.r3.2HG0150520.1	2.40353	9.26895	35.4342	73.7969	30.2259	5.83624	54.6155	9.358	3.2262	0.00729876	0.0803651	transposon protein, putative, Mariner sub-class	1278	20	0	71.65	1	F:GO:0003676	F:nucleic acid binding	-	-	-	-	-	-	-
HORVU.MOREX.r3.4HG0402860.1	0	0	13.4075	4.81284	4.55509	0	9.11019	Inf	Inf	0.0469964	0.259826	putative vesicle-associated membrane protein 726	669	20	4.42E-155	94.16	3	C:GO:0005737; C:GO:0016021; P:GO:0016192	C:cytoplasm; C:integral component of membrane; P:vesicle-mediated transport	-	-	-	-	-	-	-
HORVU.MOREX.r3.5HG0487360.1	0	0	9.57681	17.6471	6.80597	0	13.6119	Inf	Inf	0.0231102	0.173016	serine carboxypeptidase 1-like	1479	20	0	94.04	2	F:GO:0004185; P:GO:0006508	F:serine-type carboxypeptidase activity; P:proteolysis	EC:3.4; EC:3.4.16; EC:3	Acting on peptide bonds (peptidases); Acting on peptide bonds (peptidases); Hydrolases	-	-	-	-	-
HORVU.MOREX.r3.7HG0734870.1	0	0	78.5299	112.3	47.7074	0	95.4147	Inf	Inf	1.66E-08	2.15E-06	predicted protein	693	20	4.23E-131	87.01	1	P:GO:0032196	P:transposition	-	-	-	-	-	-	-
HORVU.MOREX.r3.5HG0441800.1	0	0	85.2336	118.717	50.9876	0	101.975	Inf	Inf	7.06E-09	1.10E-06	protein ALP1-like isoform X1	429	20	1.97E-100	89.07	4	F:GO:0004518; C:GO:0005634; F:GO:0046872; P:GO:0090305	F:nuclease activity; C:nucleus; F:metal ion binding; P:nucleic acid phosphodiester bond hydrolysis	EC:3.1; EC:3	Acting on ester bonds; Hydrolases	-	-	-	-	-
HORVU.MOREX.r3.2HG0113610.1	1.20177	0	11.4922	25.6685	9.5906	0.600883	18.5803	30.9217	4.95055	0.039479	0.235081	UDP-glucosyltransferase 29-like	1401	20	0	94.37	1	F:GO:0008194	F:UDP-glycosyltransferase activity	EC:2.4; EC:2	Glycosyltransferases; Transferases	-	-	-	-	-
HORVU.MOREX.r3.2HG0210050.1	0	0	12.4499	6.41712	4.71674	0	9.43349	Inf	Inf	0.0458666	0.256374	putative B3 domain-containing protein Os04g0676650 isoform X1	1341	20	0	79.8	4	F:GO:0003677; F:GO:0003700; C:GO:0005634; P:GO:0006355	F:DNA binding; F:DNA-binding transcription factor activity; C:nucleus; P:regulation of DNA-templated transcription	-	-	-	-	-	-	-
HORVU.MOREX.r3.2HG0198700.1	59.4874	117.407	1.91536	9.62568	47.1088	88.447	5.77052	0.0652427	-3.93804	0.000252015	0.00600374	non-specific lipid-transfer protein 3-like	354	20	1.05E-57	96.03	2	P:GO:0006869; F:GO:0008289	P:lipid transport; F:lipid binding	-	-	-	-	-	-	-
HORVU.MOREX.r3.5HG0524050.1	0	0	32.5612	33.6899	16.5628	0	33.1255	Inf	Inf	0.00035772	0.00796123	wall-associated receptor kinase 2-like	2178	20	0	80.91	8	F:GO:0004674; F:GO:0005509; F:GO:0005524; C:GO:0005886; P:GO:0006468; P:GO:0007166; C:GO:0016021; F:GO:0030247	F:protein serine/threonine kinase activity; F:calcium ion binding; F:ATP binding; C:plasma membrane; P:protein phosphorylation; P:cell surface receptor signaling pathway; C:integral component of membrane; F:polysaccharide binding	EC:2.7.1; EC:2.7; EC:2	Transferring phosphorus-containing groups; Transferring phosphorus-containing groups; Transferases	-	-	-	-	-
HORVU.MOREX.r3.4HG0332360.1	0	0	8.61913	12.8342	5.36334	0	10.7267	Inf	Inf	0.042105	0.243846	protein STRICTOSIDINE SYNTHASE-LIKE 10-like	1032	20	0	85.31	3	C:GO:0005773; P:GO:0009058; F:GO:0016844	C:vacuole; P:biosynthetic process; F:strictosidine synthase activity	EC:4.3; EC:4.3.3.2; EC:4; EC:4.3.3	Carbon-nitrogen lyases; Strictosidine synthase; Lyases; Carbon-nitrogen lyases	-	-	-	-	-
HORVU.MOREX.r3.7HG0648880.3	546.202	423.282	130.245	105.882	301.403	484.742	118.064	0.243559	-2.03765	0.00876569	0.0914951	coatomer subunit beta'-1 isoform X1	2718	20	0	99.7	6	C:GO:0000139; F:GO:0005198; P:GO:0006886; P:GO:0016192; C:GO:0030117; C:GO:0030663	C:Golgi membrane; F:structural molecule activity; P:intracellular protein transport; P:vesicle-mediated transport; C:membrane coat; C:COPI-coated vesicle membrane	-	-	-	-	-	-	-
HORVU.MOREX.r3.3HG0220400.1	1.20177	4.11953	22.0267	33.6899	15.2595	2.66065	27.8583	10.4705	3.38826	0.0337071	0.214643	PR5-like receptor kinase	1890	20	0	90.54	-	-	-	-	-	-	-	-	-	-
HORVU.MOREX.r3.6HG0565410.1	3.00441	0	40.2226	80.214	30.8603	1.50221	60.2183	40.0866	5.32505	0.000322265	0.00731084	protein STRICTOSIDINE SYNTHASE-LIKE 10-like	786	20	2.94E-166	93.08	4	C:GO:0005773; P:GO:0009058; C:GO:0016021; F:GO:0016844	C:vacuole; P:biosynthetic process; C:integral component of membrane; F:strictosidine synthase activity	EC:4.3; EC:4.3.3.2; EC:4; EC:4.3.3	Carbon-nitrogen lyases; Strictosidine synthase; Lyases; Carbon-nitrogen lyases	-	-	-	-	-
HORVU.MOREX.r3.7HG0728310.1	1.20177	0	54.5878	64.1712	29.9902	0.600883	59.3795	98.8205	6.62674	3.52E-05	0.00122311	putative receptor protein kinase ZmPK1	291	20	3.78E-56	91.17	-	-	-	-	-	-	-	-	-	-
HORVU.MOREX.r3.2HG0140880.1	0.600883	2.05977	31.6035	64.1712	24.6088	1.33032	47.8873	35.9967	5.16979	0.000596149	0.0120077	Acyl carrier protein 2, mitochondrial	873	20	0	92.52	1	F:GO:0046872	F:metal ion binding	-	-	-	-	-	-	-
HORVU.MOREX.r3.6HG0545330.1	2.40353	16.4781	49.7994	73.7969	35.6195	9.44083	61.7981	6.54584	2.71058	0.00984013	0.0991974	ervatamin-C-like	696	20	5.60E-147	84.87	2	P:GO:0006508; F:GO:0008234	P:proteolysis; F:cysteine-type peptidase activity	EC:3.4; EC:3	Acting on peptide bonds (peptidases); Hydrolases	-	-	-	-	-
HORVU.MOREX.r3.2HG0217990.1	0	0	11.4922	30.4813	10.4934	0	20.9867	Inf	Inf	0.00544989	0.0653935	glycosyltransferase BC10-like	1254	20	0	89.45	2	C:GO:0016021; F:GO:0016757	C:integral component of membrane; F:glycosyltransferase activity	EC:2.4; EC:2	Glycosyltransferases; Transferases	-	-	-	-	-
HORVU.MOREX.r3.5HG0467800.1	4.80706	10.2988	57.4609	67.3797	34.9866	7.55295	62.4203	8.26436	3.0469	0.00600606	0.0700303	HSP-interacting protein-like	1194	20	0	83.39	1	C:GO:0005634	C:nucleus	-	-	-	-	-	-	-
HORVU.MOREX.r3.2HG0196640.1	0.600883	0	7.66145	38.5027	11.6913	0.300441	23.0821	76.8273	6.26355	0.0121885	0.115066	hypothetical protein CFC21_021060	408	20	1.27E-39	77.99	1	C:GO:0016021	C:integral component of membrane	-	-	-	-	-	-	-
HORVU.MOREX.r3.2HG0198780.1	0.600883	2.05977	21.069	32.0856	13.9538	1.33032	26.5773	19.978	4.32034	0.0150403	0.132681	beta-glucosidase BoGH3B-like	1842	20	0	95.68	4	C:GO:0005576; P:GO:0005975; F:GO:0008422; F:GO:0102483	C:extracellular region; P:carbohydrate metabolic process; F:beta-glucosidase activity; F:scopolin beta-glucosidase activity	EC:3.2; EC:3.2.1.21; EC:3; EC:3.2.1	Glycosylases; Beta-glucosidase; Hydrolases; Glycosylases	-	-	-	K05349	Metabolic pathways; Biosynthesis of secondary metabolites; Starch and sucrose metabolism; Cyanoamino acid metabolism; Biosynthesis of various plant secondary metabolites;
HORVU.MOREX.r3.5HG0447850.1	0	0	28.7304	73.7969	25.6318	0	51.2637	Inf	Inf	1.75E-05	0.000688687	retrotransposon protein, putative, unclassified	384	20	1.32E-55	78.07	3	F:GO:0046872; P:GO:0090304; F:GO:0140640	F:metal ion binding; P:nucleic acid metabolic process; F:catalytic activity, acting on a nucleic acid	-	-	-	-	-	-	-
HORVU.MOREX.r3.1HG0061980.1	0	0	5.74609	16.0428	5.44722	0	10.8944	Inf	Inf	0.0462273	0.256784	senescence-specific cysteine protease SAG39-like	1020	20	0	95.17	2	P:GO:0006508; F:GO:0008234	P:proteolysis; F:cysteine-type peptidase activity	EC:3.4; EC:3	Acting on peptide bonds (peptidases); Hydrolases	-	-	-	-	-
HORVU.MOREX.r3.5HG0530080.1	0	0	11.4922	27.2728	9.69123	0	19.3825	Inf	Inf	0.00732051	0.0803651	predicted protein	1896	20	0	77.11	1	C:GO:0016021	C:integral component of membrane	-	-	-	-	-	-	-
HORVU.MOREX.r3.4HG0391190.1	0	0	5.74609	28.877	8.65578	0	17.3116	Inf	Inf	0.0133264	0.122463	cyclin-B1-5-like	303	20	2.94E-63	76.18	1	P:GO:0009987	P:cellular process	-	-	-	-	-	-	-
HORVU.MOREX.r3.2HG0197330.1	31.8468	25.7471	122.583	123.53	75.9267	28.7969	123.056	4.27325	2.09533	0.0182497	0.149168	norbelladine synthase-like	492	20	9.51E-106	91.84	9	F:GO:0004864; C:GO:0005634; C:GO:0005737; P:GO:0006952; P:GO:0009738; F:GO:0010427; F:GO:0038023; P:GO:0043086; P:GO:0080163	F:protein phosphatase inhibitor activity; C:nucleus; C:cytoplasm; P:defense response; P:abscisic acid-activated signaling pathway; F:abscisic acid binding; F:signaling receptor activity; P:negative regulation of catalytic activity; P:regulation of protein serine/threonine phosphatase activity	-	-	-	-	-	-	-
HORVU.MOREX.r3.5HG0485620.1	0	0	3.83073	22.4599	6.57266	0	13.1453	Inf	Inf	0.0321312	0.209465	pentatricopeptide repeat-containing protein At4g35130, chloroplastic-like	1053	20	0	92.37	1	F:GO:0008270	F:zinc ion binding	-	-	-	-	-	-	-
HORVU.MOREX.r3.6HG0629540.1	0	0	8.61913	22.4599	7.76976	0	15.5395	Inf	Inf	0.0166226	0.141326	hypothetical protein ZWY2020_023570	522	20	7.88E-119	89.19	-	-	-	-	-	-	-	-	-	-
HORVU.MOREX.r3.3HG0222580.1	0	0	19.1536	12.8342	7.99697	0	15.9939	Inf	Inf	0.0104289	0.102973	tetraketide alpha-pyrone reductase 2	981	20	0	93.66	4	C:GO:0005783; F:GO:0016616; P:GO:0048316; P:GO:0080110	C:endoplasmic reticulum; F:oxidoreductase activity, acting on the CH-OH group of donors, NAD or NADP as acceptor; P:seed development; P:sporopollenin biosynthetic process	EC:1.1; EC:1; EC:1.1.1	Acting on the CH-OH group of donors; Oxidoreductases; Acting on the CH-OH group of donors	-	-	-	-	-
HORVU.MOREX.r3.7HG0733330.1	0	4.11953	14.3652	30.4813	12.2415	2.05977	22.4233	10.8863	3.44444	0.0446511	0.25236	protein FAR1-RELATED SEQUENCE 5-like	840	20	0	77.63	3	C:GO:0005634; P:GO:0006355; F:GO:0008270	C:nucleus; P:regulation of DNA-templated transcription; F:zinc ion binding	-	-	-	-	-	-	-
HORVU.MOREX.r3.3HG0236040.1	0	2.05977	25.8574	57.7541	21.4178	1.02988	41.8057	40.5927	5.34315	0.000841532	0.0157191	hypothetical protein CFC21_021060	483	20	7.62E-44	77.39	1	C:GO:0016021	C:integral component of membrane	-	-	-	-	-	-	-
HORVU.MOREX.r3.6HG0621590.1	6.00883	2.05977	29.6881	64.1712	25.482	4.0343	46.9297	11.6327	3.54011	0.0142495	0.127892	actin cytoskeleton-regulatory complex protein PAN1-like	1956	20	0	57.81	-	-	-	-	-	-	-	-	-	-
HORVU.MOREX.r3.2HG0173660.1	7.21059	7.20919	38.3073	67.3797	30.0267	7.20989	52.8435	7.32931	2.87368	0.0213738	0.164679	putative pentatricopeptide repeat-containing protein At1g09680	1830	20	0	93.49	-	-	-	-	-	-	-	-	-	-
HORVU.MOREX.r3.2HG0208940.1	18.0265	13.3885	116.837	154.011	75.5657	15.7075	135.424	8.62162	3.10796	0.000996867	0.017996	exocyst complex component EXO70B2-like	1494	20	0	73.2	3	C:GO:0000145; P:GO:0006887; P:GO:0015031	C:exocyst; P:exocytosis; P:protein transport	-	-	-	-	-	-	-
HORVU.MOREX.r3.6HG0557740.1	22.2327	15.4483	608.128	935.295	395.276	18.8405	771.711	40.9603	5.35616	7.51E-09	1.15E-06	protein FAR1-RELATED SEQUENCE 5-like	1131	20	0	81.7	-	-	-	-	-	-	-	-	-	-
HORVU.MOREX.r3.5HG0458950.1	1.20177	0	19.1536	28.877	12.3081	0.600883	24.0153	39.9668	5.32073	0.0140555	0.126641	uncharacterized protein LOC123405597	417	20	1.02E-44	69.74	-	-	-	-	-	-	-	-	-	-
HORVU.MOREX.r3.7HG0717680.1	3.6053	1.02988	92.8951	152.407	62.4842	2.31759	122.651	52.9217	5.72579	1.00E-06	6.68E-05	protein MAIN-LIKE 2-like	657	20	6.44E-147	94.53	1	P:GO:0010073	P:meristem maintenance	-	-	-	-	-	-	-
HORVU.MOREX.r3.4HG0417750.1	0	0	31.6035	38.5027	17.5265	0	35.0531	Inf	Inf	0.000263112	0.00622075	hypothetical protein ZWY2020_059917	1137	20	0	81.16	-	-	-	-	-	-	-	-	-	-
HORVU.MOREX.r3.4HG0343360.1	4.80706	4.11953	68.9531	80.214	39.5234	4.4633	74.5835	16.7104	4.06268	0.000534206	0.0110081	exocyst complex component SEC3A-like isoform X1	2646	20	0	95.04	5	C:GO:0000145; F:GO:0005546; C:GO:0005886; P:GO:0006887; P:GO:0006893	C:exocyst; F:phosphatidylinositol-4,5-bisphosphate binding; C:plasma membrane; P:exocytosis; P:Golgi to plasma membrane transport	-	-	-	-	-	-	-
HORVU.MOREX.r3.2HG0160820.1	0	2.05977	35.4342	27.2728	16.1917	1.02988	31.3535	30.4437	4.92807	0.00308352	0.0433273	probable magnesium transporter NIPA1 isoform X1	957	20	0	98.44	5	C:GO:0005769; C:GO:0005886; F:GO:0015095; C:GO:0016021; P:GO:1903830	C:early endosome; C:plasma membrane; F:magnesium ion transmembrane transporter activity; C:integral component of membrane; P:magnesium ion transmembrane transport	EC:7	n/a	-	-	-	-	-
HORVU.MOREX.r3.2HG0134470.1	0	0	22.0267	33.6899	13.9291	0	27.8583	Inf	Inf	0.00118037	0.0207186	predicted protein	693	20	2.10E-132	89.42	1	P:GO:0032196	P:transposition	-	-	-	-	-	-	-
HORVU.MOREX.r3.2HG0175550.1	1.20177	0	49.7994	43.3156	23.5792	0.600883	46.5575	77.4818	6.27579	0.00023139	0.00562969	SUPPRESSOR OF GAMMA RESPONSE 1-like	1116	20	0	83.1	4	F:GO:0003677; F:GO:0003700; C:GO:0005634; P:GO:0006355	F:DNA binding; F:DNA-binding transcription factor activity; C:nucleus; P:regulation of DNA-templated transcription	-	-	-	-	-	-	-
HORVU.MOREX.r3.4HG0387610.1	34.2503	27.8069	1151.13	948.129	540.33	31.0286	1049.63	33.8279	5.08014	1.79E-08	2.29E-06	heat shock cognate 70 kDa protein-like	1974	20	0	98.43	10	F:GO:0005524; C:GO:0005737; F:GO:0016887; F:GO:0031072; P:GO:0034620; P:GO:0042026; F:GO:0044183; F:GO:0051082; P:GO:0051085; F:GO:0051787	F:ATP binding; C:cytoplasm; F:ATP hydrolysis activity; F:heat shock protein binding; P:cellular response to unfolded protein; P:protein refolding; F:protein folding chaperone; F:unfolded protein binding; P:chaperone cofactor-dependent protein refolding; F:misfolded protein binding	EC:3.6.1; EC:3.6; EC:3; EC:3.6.1.15	Acting on acid anhydrides; Acting on acid anhydrides; Hydrolases; Nucleoside-triphosphate phosphatase	-	-	-	K03283	Spliceosome; Endocytosis; Antigen processing and presentation;
HORVU.MOREX.r3.3HG0325340.1	9.61412	22.6574	67.0377	68.984	42.0733	16.1358	68.0109	4.21491	2.0755	0.0320082	0.209218	ABC transporter C family member 4-like	4506	20	0	89.64	4	F:GO:0005524; C:GO:0016021; P:GO:0055085; F:GO:0140359	F:ATP binding; C:integral component of membrane; P:transmembrane transport; F:ABC-type transporter activity	EC:7	n/a	-	-	-	K05665	ABC transporters;
HORVU.MOREX.r3.1HG0014350.1	24.0353	21.6276	115.879	227.808	97.3375	22.8314	171.844	7.52662	2.912	0.00145553	0.0243764	neurofilament medium polypeptide-like	1284	20	7.67E-145	76.88	-	-	-	-	-	-	-	-	-	-
HORVU.MOREX.r3.6HG0625340.1	1.20177	0	16.2806	41.7113	14.7984	0.600883	28.9959	48.2556	5.59262	0.00759312	0.0825612	GPI transamidase component PIG-T-like	1917	20	0	94.72	2	P:GO:0016255; C:GO:0042765	P:attachment of GPI anchor to protein; C:GPI-anchor transamidase complex	-	-	-	-	-	K05292	Metabolic pathways;
HORVU.MOREX.r3.1HG0072230.1	0	0	11.4922	17.6471	7.28481	0	14.5696	Inf	Inf	0.0178658	0.147264	uncharacterized protein LOC123400624	1221	20	0	87.23	-	-	-	-	-	-	-	-	-	-
HORVU.MOREX.r3.7HG0719160.1	0.600883	0	113.964	213.369	81.9835	0.300441	163.667	544.754	9.08946	1.37E-10	5.13E-08	hypothetical protein ZWY2020_032988, partial	612	20	1.17E-110	92.7	-	-	-	-	-	-	-	-	-	-
HORVU.MOREX.r3.7HG0655800.1	528.777	611.751	103.43	80.214	331.043	570.264	91.8218	0.161016	-2.63472	0.00113858	0.020104	caffeoyl-CoA O-methyltransferase 1	801	20	6.99E-170	96.54	3	F:GO:0008171; F:GO:0008757; P:GO:0032259	F:O-methyltransferase activity; F:S-adenosylmethionine-dependent methyltransferase activity; P:methylation	EC:2.1; EC:2; EC:2.1.1	Transferring one-carbon groups; Transferases; Transferring one-carbon groups	-	-	-	K00588	Metabolic pathways; Biosynthesis of secondary metabolites; Phenylpropanoid biosynthesis; Stilbenoid, diarylheptanoid and gingerol biosynthesis; Flavonoid biosynthesis;
HORVU.MOREX.r3.1HG0053180.1	0	0	14.3652	25.6685	10.0084	0	20.0168	Inf	Inf	0.00589442	0.0690502	hypothetical protein ZWY2020_021451, partial	774	20	4.35E-159	95.47	-	-	-	-	-	-	-	-	-	-
HORVU.MOREX.r3.5HG0471720.1	0	0	4.78841	19.2514	6.00994	0	12.0199	Inf	Inf	0.0386167	0.23209	ADP-ribosylation factor-like protein 8B-A	324	20	4.59E-56	74.97	3	F:GO:0003676; F:GO:0004523; P:GO:0090502	F:nucleic acid binding; F:RNA-DNA hybrid ribonuclease activity; P:RNA phosphodiester bond hydrolysis, endonucleolytic	-	-	-	-	-	-	-
HORVU.MOREX.r3.3HG0299820.1	206.704	230.694	68.9531	27.2728	133.406	218.699	48.1129	0.219996	-2.18445	0.0120354	0.113964	Histone H3.2	411	20	2.95E-92	100	4	C:GO:0000786; F:GO:0003677; C:GO:0005634; F:GO:0046982	C:nucleosome; F:DNA binding; C:nucleus; F:protein heterodimerization activity	-	-	-	-	-	K11253	-
HORVU.MOREX.r3.6HG0630580.1	0	0	4.78841	19.2514	6.00994	0	12.0199	Inf	Inf	0.0386167	0.23209	zinc finger protein 7-like	549	20	1.81E-90	63.27	4	F:GO:0003735; C:GO:0005829; C:GO:0005840; P:GO:0006412	F:structural constituent of ribosome; C:cytosol; C:ribosome; P:translation	-	-	-	-	-	-	-
HORVU.MOREX.r3.6HG0547350.1	0	0	3.83073	22.4599	6.57266	0	13.1453	Inf	Inf	0.0321312	0.209465	Werner syndrome ATP-dependent helicase-like	651	20	2.35E-143	74.31	3	F:GO:0003676; F:GO:0008408; P:GO:0090305	F:nucleic acid binding; F:3'-5' exonuclease activity; P:nucleic acid phosphodiester bond hydrolysis	EC:3.1; EC:3	Acting on ester bonds; Hydrolases	-	-	-	-	-
HORVU.MOREX.r3.5HG0423840.1	0	4.11953	53.6302	94.6525	38.1005	2.05977	74.1413	35.995	5.16972	2.85E-05	0.00102045	retrotransposon protein, putative, unclassified	1830	20	0	66.39	4	F:GO:0003676; F:GO:0004523; F:GO:0046872; P:GO:0090502	F:nucleic acid binding; F:RNA-DNA hybrid ribonuclease activity; F:metal ion binding; P:RNA phosphodiester bond hydrolysis, endonucleolytic	-	-	-	-	-	-	-
HORVU.MOREX.r3.5HG0528170.1	1.20177	6.1793	36.3919	33.6899	19.3657	3.69053	35.0409	9.4948	3.24714	0.0169753	0.142967	cation/H(+) antiporter 19-like	396	20	4.72E-70	78.39	4	F:GO:0008270; C:GO:0016020; C:GO:0016021; F:GO:0046872	F:zinc ion binding; C:membrane; C:integral component of membrane; F:metal ion binding	-	-	-	-	-	-	-
HORVU.MOREX.r3.3HG0313690.1	456.07	613.811	145.568	64.1712	319.905	534.94	104.869	0.196039	-2.35078	0.00529793	0.0640202	glutathione S-transferase 3-like	645	20	9.23E-154	94.5	5	F:GO:0004364; C:GO:0005737; P:GO:0006749; P:GO:0009636; F:GO:0043295	F:glutathione transferase activity; C:cytoplasm; P:glutathione metabolic process; P:response to toxic substance; F:glutathione binding	EC:2.5.1; EC:2.5.1.18; EC:2	Transferring alkyl or aryl groups, other than methyl groups; Glutathione transferase; Transferases	-	-	-	K00799	Metabolic pathways; Metabolism of xenobiotics by cytochrome P450; Drug metabolism - cytochrome P450; Drug metabolism - other enzymes; Chemical carcinogenesis - DNA adducts; Chemical carcinogenesis - receptor activation; Chemical carcinogenesis - reactive oxygen species;
HORVU.MOREX.r3.5HG0430450.1	1.20177	0	20.1113	27.2728	12.1465	0.600883	23.692	39.4287	5.30118	0.0142892	0.128071	pentatricopeptide repeat-containing protein At4g02750-like	2103	20	0	94.08	2	F:GO:0003723; P:GO:0009451	F:RNA binding; P:RNA modification	-	-	-	-	-	-	-
HORVU.MOREX.r3.6HG0549420.2	120.777	131.825	1157.84	1698.93	777.343	126.301	1428.38	11.3093	3.49944	7.74E-05	0.00234217	uncharacterized protein LOC123401674 isoform X2	2127	20	0	89.83	-	-	-	-	-	-	-	-	-	-
HORVU.MOREX.r3.7HG0634540.1	1.20177	0	32.5612	54.5455	22.0771	0.600883	43.5533	72.4823	6.17956	0.000558248	0.0113972	putative disease resistance protein RGA3	2838	20	0	82.05	2	P:GO:0006952; F:GO:0043531	P:defense response; F:ADP binding	-	-	-	-	-	-	-
HORVU.MOREX.r3.7HG0730960.1	0	1.02988	13.4075	25.6685	10.0265	0.514942	19.538	37.9422	5.24573	0.0175262	0.145774	putative chloride channel-like protein CLC-g	303	20	1.17E-47	95.83	-	-	-	-	-	-	-	-	-	-
HORVU.MOREX.r3.1HG0025150.1	0	0	43.0957	38.5027	20.3996	0	40.7992	Inf	Inf	7.07E-05	0.00218635	predicted protein	669	20	8.23E-153	91.44	1	P:GO:0032196	P:transposition	-	-	-	-	-	-	-
HORVU.MOREX.r3.1HG0087050.1	1.20177	0	7.66145	38.5027	11.8415	0.600883	23.0821	38.4136	5.26355	0.0231406	0.17319	predicted protein	267	20	1.70E-34	80.48	-	-	-	-	-	-	-	-	-	-
HORVU.MOREX.r3.4HG0381000.1	0	2.05977	64.1646	67.3797	33.401	1.02988	65.7722	63.8637	5.99692	1.23E-05	0.000509435	predicted protein	669	20	1.62E-152	91.73	1	P:GO:0032196	P:transposition	-	-	-	-	-	-	-
HORVU.MOREX.r3.7HG0654660.1	1.20177	0	16.2806	49.7327	16.8038	0.600883	33.0066	54.9302	5.77953	0.00424843	0.054607	hypothetical protein ZWY2020_050579	468	20	2.88E-99	88.34	2	F:GO:0008270; C:GO:0016021	F:zinc ion binding; C:integral component of membrane	-	-	-	-	-	-	-
HORVU.MOREX.r3.5HG0420670.1	4.80706	12.3586	67.0377	81.8183	41.5054	8.58283	74.428	8.67173	3.11632	0.00295164	0.0420064	uncharacterized protein LOC109742485	450	20	3.90E-105	98.05	-	-	-	-	-	-	-	-	-	-
HORVU.MOREX.r3.2HG0169530.1	7.21059	12.3586	59.3762	80.214	39.7899	9.7846	69.7951	7.13316	2.83454	0.00834287	0.088636	pentatricopeptide repeat-containing protein At2g13600	2052	20	0	94.75	4	F:GO:0003723; C:GO:0005739; P:GO:0010182; P:GO:0080156	F:RNA binding; C:mitochondrion; P:sugar mediated signaling pathway; P:mitochondrial mRNA modification	-	-	-	-	-	-	-
HORVU.MOREX.r3.3HG0296370.1	209.708	302.786	43.0957	20.8556	144.111	256.247	31.9756	0.124785	-3.00249	0.000559952	0.0114258	non-specific lipid transfer protein GPI-anchored 2-like	570	20	5.22E-84	92.65	1	C:GO:0016021	C:integral component of membrane	-	-	-	-	-	-	-
HORVU.MOREX.r3.1HG0017900.1	0	0	3.83073	19.2514	5.77052	0	11.541	Inf	Inf	0.0443506	0.251222	retrotransposon unclassified	561	20	1.46E-114	83.49	-	-	-	-	-	-	-	-	-	-
HORVU.MOREX.r3.2HG0160480.1	22.8335	25.7471	216.436	324.064	147.27	24.2903	270.25	11.1258	3.47584	5.05E-05	0.00164636	U-box domain-containing protein 9	1383	20	0	94.56	8	F:GO:0004842; C:GO:0005634; C:GO:0005737; C:GO:0005886; P:GO:0016567; P:GO:0048527; F:GO:0070696; P:GO:0071215	F:ubiquitin-protein transferase activity; C:nucleus; C:cytoplasm; C:plasma membrane; P:protein ubiquitination; P:lateral root development; F:transmembrane receptor protein serine/threonine kinase binding; P:cellular response to abscisic acid stimulus	EC:2	Transferases	-	-	-	-	-
HORVU.MOREX.r3.2HG0096060.1	0	0	7.66145	17.6471	6.32713	0	12.6543	Inf	Inf	0.0301232	0.201313	hypothetical protein ZWY2020_004145	705	20	3.42E-144	96.55	-	-	-	-	-	-	-	-	-	-
HORVU.MOREX.r3.2HG0110660.1	0	0	4.78841	28.877	8.41636	0	16.8327	Inf	Inf	0.0151398	0.133269	probable F-box protein At4g22165	1491	20	0	85.72	-	-	-	-	-	-	-	-	-	-
HORVU.MOREX.r3.7HG0669290.1	18.0265	57.6735	7.66145	0	20.8404	37.85	3.83073	0.101208	-3.3046	0.0461602	0.256784	protein TIFY 11e-like	411	20	6.58E-92	90.63	-	-	-	-	-	-	-	-	K13464	Plant hormone signal transduction;
HORVU.MOREX.r3.7HG0750670.1	0	0	8.61913	20.8556	7.36869	0	14.7374	Inf	Inf	0.019336	0.15489	BTB/POZ and MATH domain-containing protein 1-like	453	20	4.78E-102	89.67	2	P:GO:0009628; P:GO:0016567	P:response to abiotic stimulus; P:protein ubiquitination	-	-	-	-	-	-	-
HORVU.MOREX.r3.2HG0194500.1	0	0	4.78841	19.2514	6.00994	0	12.0199	Inf	Inf	0.0386167	0.23209	AP2-containing protein	558	20	2.38E-97	88.47	4	F:GO:0003677; F:GO:0003700; C:GO:0005634; P:GO:0006355	F:DNA binding; F:DNA-binding transcription factor activity; C:nucleus; P:regulation of DNA-templated transcription	-	-	-	-	-	-	-
HORVU.MOREX.r3.3HG0295580.1	688.611	998.987	227.928	147.594	515.78	843.799	187.761	0.222519	-2.168	0.00986103	0.0992049	tubulin beta-2 chain	1377	20	0	98.51	7	P:GO:0000226; P:GO:0000278; F:GO:0003924; F:GO:0005200; F:GO:0005525; C:GO:0005737; C:GO:0005874	P:microtubule cytoskeleton organization; P:mitotic cell cycle; F:GTPase activity; F:structural constituent of cytoskeleton; F:GTP binding; C:cytoplasm; C:microtubule	EC:3.6.1; EC:3.6; EC:3; EC:3.6.1.15	Acting on acid anhydrides; Acting on acid anhydrides; Hydrolases; Nucleoside-triphosphate phosphatase	-	-	-	K07375	Pathogenic Escherichia coli infection; Salmonella infection;
HORVU.MOREX.r3.5HG0537140.1	0	0	7.66145	12.8342	5.12392	0	10.2478	Inf	Inf	0.0481216	0.26223	predicted protein	720	20	2.35E-155	85.1	-	-	-	-	-	-	-	-	-	-
HORVU.MOREX.r3.2HG0127590.1	0	4.11953	33.5188	43.3156	20.2385	2.05977	38.4172	18.6512	4.2212	0.00340948	0.0464643	hypothetical protein ZWY2020_033071	573	20	6.21E-64	84.87	-	-	-	-	-	-	-	-	-	-
HORVU.MOREX.r3.2HG0203350.1	1.20177	4.11953	32.5612	54.5455	23.107	2.66065	43.5533	16.3694	4.03293	0.00401181	0.0522635	AP2-like ethylene-responsive transcription factor AIL5	1446	20	0	91.48	4	F:GO:0003677; F:GO:0003700; C:GO:0005634; P:GO:0006355	F:DNA binding; F:DNA-binding transcription factor activity; C:nucleus; P:regulation of DNA-templated transcription	-	-	-	-	-	-	-
HORVU.MOREX.r3.3HG0307370.1	7.21059	8.23907	38.3073	72.1926	31.4874	7.72483	55.2499	7.15225	2.8384	0.0203468	0.159983	Cohesin subunit SA-1	501	20	1.34E-69	82.85	2	F:GO:0003677; C:GO:0005634	F:DNA binding; C:nucleus	-	-	-	-	-	-	-
HORVU.MOREX.r3.4HG0395840.1	94.9394	71.062	20.1113	17.6471	50.9399	83.0007	18.8792	0.227458	-2.13633	0.0284932	0.195286	G-type lectin S-receptor-like serine/threonine-protein kinase At2g19130	2475	20	0	93.18	7	F:GO:0004674; F:GO:0004712; F:GO:0005524; P:GO:0006468; C:GO:0016021; P:GO:0048544; F:GO:0106310	F:protein serine/threonine kinase activity; F:protein serine/threonine/tyrosine kinase activity; F:ATP binding; P:protein phosphorylation; C:integral component of membrane; P:recognition of pollen; F:protein serine kinase activity	EC:2.7.1; EC:2.7.12.1; EC:2.7; EC:2	Transferring phosphorus-containing groups; Dual-specificity kinase; Transferring phosphorus-containing groups; Transferases	-	-	-	-	-
HORVU.MOREX.r3.2HG0179810.1	0	0	6.70377	36.8984	10.9006	0	21.8011	Inf	Inf	0.00556241	0.0663196	protein FAR1-RELATED SEQUENCE 5-like	426	20	1.02E-72	92.16	3	C:GO:0005634; P:GO:0006355; F:GO:0008270	C:nucleus; P:regulation of DNA-templated transcription; F:zinc ion binding	-	-	-	-	-	-	-
HORVU.MOREX.r3.2HG0120400.1	1.80265	0	78.5299	137.968	54.5751	0.901324	108.249	120.1	6.90809	2.69E-07	2.22E-05	hypothetical protein ZWY2020_033071	603	20	3.80E-51	81.36	-	-	-	-	-	-	-	-	-	-
HORVU.MOREX.r3.2HG0120610.1	2.40353	5.14942	229.844	348.129	146.381	3.77647	288.986	76.5227	6.25782	2.43E-10	7.79E-08	uncharacterized protein LOC123404790	1776	20	2.60E-149	82.34	-	-	-	-	-	-	-	-	-	-
HORVU.MOREX.r3.3HG0322090.1	1.20177	2.05977	34.4765	60.9626	24.6752	1.63077	47.7196	29.2621	4.87096	0.00099698	0.017996	protein IAL1-like	1143	20	0	78.91	-	-	-	-	-	-	-	-	-	-
HORVU.MOREX.r3.4HG0395180.1	0	0	24.8997	12.8342	9.43349	0	18.867	Inf	Inf	0.00513774	0.0627918	hypothetical protein CFC21_058374	978	20	0	63.01	-	-	-	-	-	-	-	-	-	-
HORVU.MOREX.r3.3HG0305420.1	9.61412	8.23907	113.964	131.551	65.842	8.92659	122.758	13.7519	3.78156	0.000134022	0.00369718	ETHYLENE INSENSITIVE 3-like 5 protein	1389	20	0	85.84	5	F:GO:0003677; F:GO:0003700; C:GO:0005634; P:GO:0006355; P:GO:0009873	F:DNA binding; F:DNA-binding transcription factor activity; C:nucleus; P:regulation of DNA-templated transcription; P:ethylene-activated signaling pathway	-	-	-	-	-	K14514	MAPK signaling pathway - plant; Plant hormone signal transduction;
HORVU.MOREX.r3.6HG0538580.1	2.40353	0	37.3496	91.4439	32.7993	1.20177	64.3968	53.5851	5.74376	0.000123774	0.00347317	uncharacterized protein LOC123402462	2871	20	0	73.07	-	-	-	-	-	-	-	-	-	-
HORVU.MOREX.r3.5HG0535190.1	0	0	10.5345	22.4599	8.2486	0	16.4972	Inf	Inf	0.0129377	0.119993	hypothetical protein ZWY2020_019405	984	20	0	92	-	-	-	-	-	-	-	-	-	-
HORVU.MOREX.r3.2HG0098630.1	1.20177	0	28.7304	25.6685	13.9002	0.600883	27.1995	45.2658	5.50035	0.00681407	0.0765731	uncharacterized protein LOC123405802	843	20	2.74E-168	82.53	-	-	-	-	-	-	-	-	-	-
HORVU.MOREX.r3.2HG0185550.1	28.2415	22.6574	639.731	718.717	352.337	25.4495	679.224	26.6891	4.73818	7.99E-08	7.96E-06	probable WRKY transcription factor 12	693	20	2.66E-134	86.52	5	F:GO:0003700; C:GO:0005634; P:GO:0006355; F:GO:0043565; P:GO:0050896	F:DNA-binding transcription factor activity; C:nucleus; P:regulation of DNA-templated transcription; F:sequence-specific DNA binding; P:response to stimulus	-	-	-	-	-	-	-
HORVU.MOREX.r3.6HG0621370.1	3.00441	0	24.8997	25.6685	13.3932	1.50221	25.2841	16.8313	4.07308	0.032547	0.210686	D-3-phosphoglycerate dehydrogenase, chloroplastic	1893	20	0	93.2	-	-	-	-	-	-	-	-	-	-
HORVU.MOREX.r3.1HG0080950.1	0	0	67.9954	112.3	45.0737	0	90.1475	Inf	Inf	3.77E-08	4.39E-06	vicilin-like seed storage protein At2g18540	555	20	2.65E-74	95.94	-	-	-	-	-	-	-	-	-	-
HORVU.MOREX.r3.2HG0101170.1	1.20177	2.05977	14.3652	65.7755	20.8506	1.63077	40.0703	24.5715	4.61891	0.00467724	0.058653	uncharacterized protein LOC123424949	2805	20	0	79.52	-	-	-	-	-	-	-	-	-	-
HORVU.MOREX.r3.3HG0226900.1	0.600883	0	25.8574	52.9412	19.8499	0.300441	39.3993	131.138	7.03494	0.000534657	0.0110114	predicted protein	393	20	1.39E-50	76.62	1	C:GO:0016021	C:integral component of membrane	-	-	-	-	-	-	-
HORVU.MOREX.r3.4HG0396540.2	55.8821	53.5539	8.61913	9.62568	31.9202	54.718	9.1224	0.166717	-2.58453	0.0253554	0.183317	GDP-mannose transporter GONST3-like isoform X1	1125	20	0	96.58	5	F:GO:0005457; C:GO:0005794; F:GO:0015297; P:GO:0015783; C:GO:0016021	F:GDP-fucose transmembrane transporter activity; C:Golgi apparatus; F:antiporter activity; P:GDP-fucose transmembrane transport; C:integral component of membrane	EC:7	n/a	-	-	-	-	-
HORVU.MOREX.r3.4HG0396540.1	54.0794	50.4643	5.74609	12.8342	30.781	52.2719	9.29016	0.177728	-2.49226	0.0252612	0.182745	GDP-mannose transporter GONST3-like isoform X1	1095	20	0	96.71	5	F:GO:0005457; C:GO:0005794; F:GO:0015297; P:GO:0015783; C:GO:0016021	F:GDP-fucose transmembrane transporter activity; C:Golgi apparatus; F:antiporter activity; P:GDP-fucose transmembrane transport; C:integral component of membrane	EC:7	n/a	-	-	-	-	-
HORVU.MOREX.r3.6HG0631050.1	50.4741	83.4206	5.74609	3.20856	35.7123	66.9474	4.47732	0.0668783	-3.90232	0.00188188	0.0297871	probable histone H2AXb	426	20	3.18E-42	95.42	4	C:GO:0000786; F:GO:0003677; C:GO:0005634; F:GO:0046982	C:nucleosome; F:DNA binding; C:nucleus; F:protein heterodimerization activity	-	-	-	-	-	K11251	Necroptosis;
HORVU.MOREX.r3.7HG0751830.1	0	0	13.4075	9.62568	5.7583	0	11.5166	Inf	Inf	0.0297945	0.20015	predicted protein	1227	20	0	66.07	-	-	-	-	-	-	-	-	-	-
HORVU.MOREX.r3.6HG0538810.1	1.20177	0	24.8997	17.6471	10.9371	0.600883	21.2734	35.4036	5.14582	0.0174144	0.145214	probable glycerol-3-phosphate acyltransferase 3	1587	20	0	82.45	2	C:GO:0016020; F:GO:0016746	C:membrane; F:acyltransferase activity	EC:2.3; EC:2	Acyltransferases; Transferases	-	-	-	K13508	Metabolic pathways; Biosynthesis of secondary metabolites; Glycerolipid metabolism; Glycerophospholipid metabolism;
HORVU.MOREX.r3.4HG0338110.1	1.20177	0	22.0267	20.8556	11.021	0.600883	21.4412	35.6828	5.15716	0.0185449	0.150838	predicted protein	651	20	7.30E-149	71.92	3	F:GO:0003676; F:GO:0008408; P:GO:0090305	F:nucleic acid binding; F:3'-5' exonuclease activity; P:nucleic acid phosphodiester bond hydrolysis	EC:3.1; EC:3	Acting on ester bonds; Hydrolases	-	-	-	-	-
HORVU.MOREX.r3.7HG0751730.1	0	2.05977	15.3229	35.2942	13.1692	1.02988	25.3085	24.5742	4.61907	0.0128874	0.119678	zinc finger protein ZAT9-like	561	20	4.72E-88	83.21	-	-	-	-	-	-	-	-	-	-
HORVU.MOREX.r3.5HG0534140.1	2.40353	0	21.069	75.4011	24.7184	1.20177	48.2351	40.1369	5.32686	0.00134864	0.0229088	hypothetical protein ZWY2020_019313	882	3	1.75E-19	78.1	-	-	-	-	-	-	-	-	-	-
HORVU.MOREX.r3.7HG0648200.1	51.6759	19.5678	393.607	598.396	265.812	35.6218	496.002	13.9241	3.79951	1.69E-05	0.000665857	NBS-LRR disease resistance protein	999	20	3.97E-136	74.97	6	F:GO:0004252; P:GO:0006508; C:GO:0016021; F:GO:0016760; P:GO:0030244; P:GO:0071669	F:serine-type endopeptidase activity; P:proteolysis; C:integral component of membrane; F:cellulose synthase (UDP-forming) activity; P:cellulose biosynthetic process; P:plant-type cell wall organization or biogenesis	EC:3.4.21; EC:2.4.1.12; EC:3.4; EC:2.4; EC:2; EC:3; EC:2.4.1	Acting on peptide bonds (peptidases); Cellulose synthase (UDP-forming); Acting on peptide bonds (peptidases); Glycosyltransferases; Transferases; Hydrolases; Glycosyltransferases	-	-	-	-	-
HORVU.MOREX.r3.3HG0224860.1	3.00441	3.08965	28.7304	36.8984	17.9307	3.04703	32.8144	10.7693	3.42885	0.0266951	0.188774	hypothetical protein ZWY2020_031568	381	20	1.50E-58	89.11	-	-	-	-	-	-	-	-	-	-
HORVU.MOREX.r3.1HG0010400.1	2.40353	6.1793	41.1803	38.5027	22.0665	4.29142	39.8415	9.284	3.21475	0.0142011	0.127677	zinc finger MYM-type protein 1-like	288	20	2.93E-49	90.68	2	C:GO:0016021; F:GO:0046983	C:integral component of membrane; F:protein dimerization activity	-	-	-	-	-	-	-
HORVU.MOREX.r3.7HG0661570.1	16.8247	22.6574	86.1913	86.6311	53.0761	19.7411	86.4112	4.37723	2.13002	0.0232626	0.173741	chaperone protein DnaJ-like	714	20	1.73E-172	84.08	1	C:GO:0005783	C:endoplasmic reticulum	-	-	-	-	-	-	-
HORVU.MOREX.r3.1HG0006660.1	305.248	374.878	25.8574	22.4599	182.111	340.063	24.1587	0.0710417	-3.81519	7.97E-06	0.000357356	soluble inorganic pyrophosphatase 4-like	654	20	2.25E-158	97.17	5	F:GO:0000287; F:GO:0004427; C:GO:0005654; C:GO:0005829; P:GO:0006796	F:magnesium ion binding; F:inorganic diphosphate phosphatase activity; C:nucleoplasm; C:cytosol; P:phosphate-containing compound metabolic process	EC:3.6.1.1; EC:3.6.1; EC:3.6; EC:3	Inorganic diphosphatase; Acting on acid anhydrides; Acting on acid anhydrides; Hydrolases	-	-	-	K01507	Oxidative phosphorylation;
HORVU.MOREX.r3.4HG0350310.1	0	0	15.3229	3.20856	4.63287	0	9.26573	Inf	Inf	0.0421185	0.243846	putative pentatricopeptide repeat-containing protein At3g13770, mitochondrial	582	20	3.53E-96	91.67	-	-	-	-	-	-	-	-	-	-
HORVU.MOREX.r3.1HG0092950.1	0	0	29.6881	40.107	17.4488	0	34.8976	Inf	Inf	0.000285057	0.00661748	predicted protein	393	20	6.32E-51	76.62	1	C:GO:0016021	C:integral component of membrane	-	-	-	-	-	-	-
HORVU.MOREX.r3.7HG0719110.1	23.4344	18.5379	88.1067	107.487	59.3914	20.9862	97.7967	4.66006	2.22035	0.0219137	0.166818	peroxidase P7-like	945	20	0	86.43	7	F:GO:0004601; C:GO:0005576; P:GO:0006979; F:GO:0020037; P:GO:0042744; F:GO:0046872; P:GO:0098869	F:peroxidase activity; C:extracellular region; P:response to oxidative stress; F:heme binding; P:hydrogen peroxide catabolic process; F:metal ion binding; P:cellular oxidant detoxification	EC:1.11; EC:1; EC:1.11.1	Acting on a peroxide as acceptor; Oxidoreductases; Acting on a peroxide as acceptor	-	-	-	K00430	Metabolic pathways; Biosynthesis of secondary metabolites; Phenylpropanoid biosynthesis;
HORVU.MOREX.r3.2HG0153460.1	0	0	11.4922	12.8342	6.0816	0	12.1632	Inf	Inf	0.0283886	0.194901	hypothetical protein ZWY2020_032988, partial	690	20	8.62E-140	96.06	-	-	-	-	-	-	-	-	-	-
HORVU.MOREX.r3.6HG0582900.1	3.6053	0	108.218	155.615	66.8596	1.80265	131.917	73.1793	6.19336	2.13E-07	1.84E-05	predicted protein	660	20	3.01E-110	81.8	1	P:GO:0032196	P:transposition	-	-	-	-	-	-	-
HORVU.MOREX.r3.7HG0727700.1	0.600883	2.05977	107.26	145.989	63.9776	1.33032	126.625	95.1834	6.57264	3.12E-08	3.73E-06	predicted protein	687	20	5.54E-134	83.96	1	P:GO:0032196	P:transposition	-	-	-	-	-	-	-
HORVU.MOREX.r3.1HG0020840.1	6.60971	8.23907	194.409	283.958	123.304	7.42439	239.183	32.2159	5.0097	1.01E-07	9.64E-06	pentatricopeptide repeat-containing protein At3g05340	1863	20	0	93.85	3	F:GO:0003723; P:GO:0009451; C:GO:0043231	F:RNA binding; P:RNA modification; C:intracellular membrane-bounded organelle	-	-	-	-	-	-	-
HORVU.MOREX.r3.2HG0113920.1	0	0	7.66145	17.6471	6.32713	0	12.6543	Inf	Inf	0.0301232	0.201313	autophagy-related protein 18d-like	1188	20	0	67.47	-	-	-	-	-	-	-	-	-	-
HORVU.MOREX.r3.7HG0707750.1	0	0	8.61913	17.6471	6.56655	0	13.1331	Inf	Inf	0.0263629	0.187161	NDR1/HIN1-like protein 10	642	20	1.19E-126	84.37	4	C:GO:0009506; C:GO:0016021; C:GO:0046658; P:GO:0098542	C:plasmodesma; C:integral component of membrane; C:anchored component of plasma membrane; P:defense response to other organism	-	-	-	-	-	-	-
HORVU.MOREX.r3.7HG0672190.1	0	0	21.069	20.8556	10.4812	0	20.9623	Inf	Inf	0.00397811	0.0519506	hypothetical protein ZWY2020_014616	576	20	1.05E-54	89.28	-	-	-	-	-	-	-	-	-	-
HORVU.MOREX.r3.7HG0650410.1	0	0	16.2806	8.0214	6.0755	0	12.151	Inf	Inf	0.0236626	0.175365	PHD finger protein ALFIN-LIKE 3-like	942	20	0	84.25	-	-	-	-	-	-	-	-	-	-
HORVU.MOREX.r3.3HG0298370.1	0	0	28.7304	43.3156	18.0115	0	36.023	Inf	Inf	0.000240516	0.00578558	beta-galactosidase 7-like	2502	20	0	94.76	4	F:GO:0004565; P:GO:0005975; F:GO:0030246; C:GO:0048046	F:beta-galactosidase activity; P:carbohydrate metabolic process; F:carbohydrate binding; C:apoplast	EC:3.2; EC:3; EC:3.2.1.23; EC:3.2.1	Glycosylases; Hydrolases; Beta-galactosidase; Glycosylases	-	-	-	-	-
HORVU.MOREX.r3.4HG0395760.1	0	0	5.74609	16.0428	5.44722	0	10.8944	Inf	Inf	0.0462273	0.256784	hypothetical protein ZWY2020_004145	690	20	3.33E-140	96.06	-	-	-	-	-	-	-	-	-	-
HORVU.MOREX.r3.3HG0300630.1	2.40353	0	29.6881	20.8556	13.2368	1.20177	25.2719	21.029	4.39431	0.0208916	0.162564	protein SUPPRESSOR OF GENE SILENCING 3 homolog	1800	20	0	84.75	2	P:GO:0031047; P:GO:0051607	P:gene silencing by RNA; P:defense response to virus	-	-	-	-	-	-	-
HORVU.MOREX.r3.4HG0342330.1	0	0	8.61913	16.0428	6.16548	0	12.331	Inf	Inf	0.0308576	0.204185	hypothetical protein ZWY2020_032988, partial	774	20	5.66E-154	95.89	-	-	-	-	-	-	-	-	-	-
HORVU.MOREX.r3.2HG0177470.1	0	0	8.61913	20.8556	7.36869	0	14.7374	Inf	Inf	0.019336	0.15489	hypothetical protein ZWY2020_051809	357	20	8.14E-31	91.61	-	-	-	-	-	-	-	-	-	-
HORVU.MOREX.r3.2HG0134080.1	0	0	10.5345	14.4385	6.24325	0	12.4865	Inf	Inf	0.0276982	0.192437	predicted protein	693	20	6.93E-142	87.06	1	P:GO:0032196	P:transposition	-	-	-	-	-	-	-
HORVU.MOREX.r3.2HG0167420.1	6.00883	7.20919	40.2226	72.1926	31.4083	6.60901	56.2076	8.5047	3.08826	0.01185	0.112949	uncharacterized protein LOC123399644 isoform X2	837	20	6.35E-169	93.6	-	-	-	-	-	-	-	-	-	-
HORVU.MOREX.r3.3HG0220780.1	0	0	6.70377	25.6685	8.09306	0	16.1861	Inf	Inf	0.0158608	0.13699	predicted protein	651	20	1.88E-138	72.23	3	F:GO:0003676; F:GO:0008408; P:GO:0090305	F:nucleic acid binding; F:3'-5' exonuclease activity; P:nucleic acid phosphodiester bond hydrolysis	EC:3.1; EC:3	Acting on ester bonds; Hydrolases	-	-	-	-	-
HORVU.MOREX.r3.7HG0752460.1	0	0	7.66145	14.4385	5.52499	0	11.05	Inf	Inf	0.0412389	0.241449	predicted protein	273	20	9.54E-56	89.58	-	-	-	-	-	-	-	-	-	-
HORVU.MOREX.r3.2HG0134960.1	1.80265	2.05977	39.2649	33.6899	19.2043	1.93121	36.4774	18.8884	4.23943	0.00579445	0.0680703	hypothetical protein ZWY2020_030727	369	20	7.97E-64	88.87	-	-	-	-	-	-	-	-	-	-
HORVU.MOREX.r3.6HG0541630.1	0	0	22.0267	49.7327	17.9398	0	35.8797	Inf	Inf	0.000298171	0.00687642	retrotransposon protein, putative, unclassified	456	20	2.22E-60	77.74	4	F:GO:0003676; F:GO:0004523; F:GO:0008270; P:GO:0090502	F:nucleic acid binding; F:RNA-DNA hybrid ribonuclease activity; F:zinc ion binding; P:RNA phosphodiester bond hydrolysis, endonucleolytic	EC:3.1.30; EC:3.1; EC:3; EC:3.1.26; EC:3.1.26.4	Acting on ester bonds; Acting on ester bonds; Hydrolases; Acting on ester bonds; Ribonuclease H	-	-	-	-	-
HORVU.MOREX.r3.2HG0136370.1	0	1.02988	19.1536	6.41712	6.65016	0.514942	12.7854	24.8288	4.63394	0.042811	0.246487	D-3-phosphoglycerate dehydrogenase, chloroplastic	1941	20	0	89.53	-	-	-	-	-	-	-	-	-	-
HORVU.MOREX.r3.2HG0151690.1	1.80265	0	19.1536	49.7327	17.6722	0.901324	34.4431	38.214	5.25603	0.00563505	0.0669307	predicted protein	693	20	1.24E-129	88.04	1	P:GO:0032196	P:transposition	-	-	-	-	-	-	-
HORVU.MOREX.r3.7HG0727000.1	2.40353	0	31.6035	52.9412	21.7371	1.20177	42.2724	35.1752	5.13649	0.00224865	0.0341665	Protein FAR-RED ELONGATED HYPOCOTYL 3	1089	20	0	85.91	-	-	-	-	-	-	-	-	-	-
HORVU.MOREX.r3.2HG0143320.1	0	0	61.2916	94.6525	38.986	0	77.9721	Inf	Inf	1.87E-07	1.64E-05	predicted protein	693	20	1.70E-141	86.99	1	P:GO:0032196	P:transposition	-	-	-	-	-	-	-
HORVU.MOREX.r3.6HG0579770.1	1.20177	0	22.9844	38.5027	15.6722	0.600883	30.7435	51.164	5.67706	0.00487039	0.0603295	retrotransposon protein, putative, unclassified	1116	20	8.72E-149	60.24	5	P:GO:0006807; P:GO:0009987; F:GO:0016740; P:GO:0043170; P:GO:0044238	P:nitrogen compound metabolic process; P:cellular process; F:transferase activity; P:macromolecule metabolic process; P:primary metabolic process	EC:2	Transferases	-	-	-	-	-
HORVU.MOREX.r3.1HG0081080.1	196.489	207.007	24.8997	41.7113	117.527	201.748	33.3055	0.165085	-2.59872	0.0012484	0.0216595	protein IQ-DOMAIN 31-like isoform X1	1743	20	0	96.81	4	C:GO:0005741; F:GO:0008308; P:GO:0015698; P:GO:0098656	C:mitochondrial outer membrane; F:voltage-gated anion channel activity; P:inorganic anion transport; P:anion transmembrane transport	EC:7	n/a	-	-	-	-	-
HORVU.MOREX.r3.1HG0081080.2	161.037	201.857	41.1803	48.1284	113.051	181.447	44.6543	0.246102	-2.02267	0.0131829	0.12173	protein IQ-DOMAIN 31-like isoform X2	1740	20	0	96.88	4	C:GO:0005741; F:GO:0008308; P:GO:0015698; P:GO:0098656	C:mitochondrial outer membrane; F:voltage-gated anion channel activity; P:inorganic anion transport; P:anion transmembrane transport	EC:7	n/a	-	-	-	-	-
HORVU.MOREX.r3.7HG0731570.1	0	0	12.4499	14.4385	6.72209	0	13.4442	Inf	Inf	0.0213467	0.164538	hypothetical protein ZWY2020_012798	576	20	3.19E-51	88.88	-	-	-	-	-	-	-	-	-	-
HORVU.MOREX.r3.2HG0101650.1	0	8.23907	91.9374	129.947	57.5308	4.11953	110.942	26.9307	4.75118	4.08E-06	0.000204969	disease resistance protein RPM1-like	627	5	1.62E-91	89.69	-	-	-	-	-	-	-	-	-	-
HORVU.MOREX.r3.4HG0332380.1	0	0	22.0267	28.877	12.7259	0	25.4519	Inf	Inf	0.00177133	0.0284938	3-ketoacyl-CoA synthase 5-like	1389	20	0	80.55	2	C:GO:0016020; F:GO:0016747	C:membrane; F:acyltransferase activity, transferring groups other than amino-acyl groups	EC:2.3; EC:2; EC:2.3.1	Acyltransferases; Transferases; Acyltransferases	-	-	-	K15397	Metabolic pathways; Biosynthesis of secondary metabolites; Plant-pathogen interaction;
HORVU.MOREX.r3.6HG0626130.1	17.4256	14.4184	289.22	547.059	217.031	15.922	418.14	26.2618	4.71489	1.87E-07	1.64E-05	retrotransposon protein, putative, unclassified	2124	20	0	69.73	7	F:GO:0000166; P:GO:0006810; C:GO:0016020; F:GO:0022857; F:GO:0043167; P:GO:0090304; F:GO:0140640	F:nucleotide binding; P:transport; C:membrane; F:transmembrane transporter activity; F:ion binding; P:nucleic acid metabolic process; F:catalytic activity, acting on a nucleic acid	EC:7	n/a	-	-	-	-	-
HORVU.MOREX.r3.4HG0331360.1	8.41236	10.2988	141.737	158.824	79.8179	9.3556	150.28	16.0631	4.00568	2.16E-05	0.000809902	ethylene-response factor C3-like	981	20	2.37E-173	76.37	1	P:GO:0050794	P:regulation of cellular process	-	-	-	-	-	K14516	MAPK signaling pathway - plant; Plant hormone signal transduction;
HORVU.MOREX.r3.7HG0675560.1	0	0	7.66145	16.0428	5.92606	0	11.8521	Inf	Inf	0.0352772	0.220637	probable inorganic phosphate transporter 1-10	1698	20	0	90.37	3	F:GO:0015293; C:GO:0016021; P:GO:0055085	F:symporter activity; C:integral component of membrane; P:transmembrane transport	EC:7	n/a	-	-	-	-	-
HORVU.MOREX.r3.4HG0413050.1	15.6229	17.508	90.022	51.3369	43.6225	16.5655	70.6795	4.26667	2.09311	0.0277998	0.193071	NAC domain-containing protein 78	2070	20	0	87.38	3	F:GO:0003677; C:GO:0005634; P:GO:0006355	F:DNA binding; C:nucleus; P:regulation of DNA-templated transcription	-	-	-	-	-	-	-
HORVU.MOREX.r3.4HG0340750.1	76.3121	54.5838	215.478	367.38	178.439	65.448	291.429	4.45284	2.15473	0.0117167	0.112206	hypothetical protein ZWY2020_036129	1089	20	0	79.26	1	F:GO:0005488	F:binding	-	-	-	-	-	-	-
HORVU.MOREX.r3.7HG0650800.1	2.40353	0	14.3652	33.6899	12.6147	1.20177	24.0275	19.9935	4.32146	0.0376966	0.229149	hypothetical protein D1007_55788	1389	20	0	77.32	-	-	-	-	-	-	-	-	-	-
HORVU.MOREX.r3.2HG0187140.1	0	0	16.2806	60.9626	19.3108	0	38.6216	Inf	Inf	0.000216975	0.00537357	putative calcium-binding protein CML16	708	20	3.50E-153	94.47	-	-	-	-	-	-	-	-	-	-
HORVU.MOREX.r3.2HG0179210.1	69.7024	63.8528	259.532	340.107	183.299	66.7776	299.819	4.48982	2.16666	0.00766143	0.0831354	DNA-dependent RNA polymerase	960	20	0	96.38	4	F:GO:0003677; F:GO:0003899; P:GO:0006390; C:GO:0034245	F:DNA binding; F:DNA-directed 5'-3' RNA polymerase activity; P:mitochondrial transcription; C:mitochondrial DNA-directed RNA polymerase complex	EC:2.7; EC:2; EC:2.7.7; EC:2.7.7.6	Transferring phosphorus-containing groups; Transferases; Transferring phosphorus-containing groups; DNA-directed RNA polymerase	-	-	-	-	-
HORVU.MOREX.r3.4HG0409210.1	73.3077	106.078	15.3229	9.62568	51.0836	89.6928	12.4743	0.139078	-2.84604	0.00694376	0.0775441	glutathione S-transferase F10-like	1074	20	0	82.86	4	F:GO:0004364; C:GO:0005737; P:GO:0006749; F:GO:0043295	F:glutathione transferase activity; C:cytoplasm; P:glutathione metabolic process; F:glutathione binding	EC:2.5.1; EC:2.5.1.18; EC:2	Transferring alkyl or aryl groups, other than methyl groups; Glutathione transferase; Transferases	-	-	-	K00799	Metabolic pathways; Metabolism of xenobiotics by cytochrome P450; Drug metabolism - cytochrome P450; Drug metabolism - other enzymes; Chemical carcinogenesis - DNA adducts; Chemical carcinogenesis - receptor activation; Chemical carcinogenesis - reactive oxygen species;
HORVU.MOREX.r3.6HG0576890.1	3.00441	0	50.7571	68.984	30.6864	1.50221	59.8706	39.8551	5.31669	0.000261965	0.00620076	mutator protein	885	20	0	98.06	-	-	-	-	-	-	-	-	-	-
HORVU.MOREX.r3.2HG0125840.1	37.8556	47.3746	254.743	386.631	181.651	42.6151	320.687	7.5252	2.91173	0.000406146	0.00882962	serine/threonine-protein kinase RIPK-like	1356	20	0	88.61	3	F:GO:0004672; F:GO:0005524; P:GO:0006468	F:protein kinase activity; F:ATP binding; P:protein phosphorylation	EC:2.7.1; EC:2.7; EC:2	Transferring phosphorus-containing groups; Transferring phosphorus-containing groups; Transferases	-	-	-	-	-
HORVU.MOREX.r3.3HG0244660.1	3.6053	3.08965	104.387	144.385	63.8668	3.34747	124.386	37.1582	5.21561	1.95E-06	0.000113098	predicted protein	747	20	1.13E-139	72.52	3	F:GO:0003676; F:GO:0008408; P:GO:0090305	F:nucleic acid binding; F:3'-5' exonuclease activity; P:nucleic acid phosphodiester bond hydrolysis	EC:3.1; EC:3	Acting on ester bonds; Hydrolases	-	-	-	-	-
HORVU.MOREX.r3.3HG0288610.1	7.21059	4.11953	42.138	75.4011	32.2173	5.66506	58.7696	10.374	3.37491	0.00795418	0.0854966	acyl-[acyl-carrier-protein] desaturase 4, chloroplastic-like	1020	20	0	80.67	4	P:GO:0006633; C:GO:0009536; F:GO:0045300; F:GO:0046872	P:fatty acid biosynthetic process; C:plastid; F:acyl-[acyl-carrier-protein] desaturase activity; F:metal ion binding	EC:1.14.19.2; EC:1; EC:1.14; EC:1.14.19	Stearoyl-[acyl-carrier-protein] 9-desaturase; Oxidoreductases; Acting on paired donors, with incorporation or reduction of molecular oxygen. The oxygen incorporated need not be derived from O(2); Acting on paired donors, with incorporation or reduction of molecular oxygen. The oxygen incorporated need not be derived from O(2)	-	-	-	-	-
HORVU.MOREX.r3.6HG0612430.1	0	0	20.1113	44.9198	16.2578	0	32.5156	Inf	Inf	0.000566844	0.0115413	putative calcium-binding protein CML16	708	20	2.43E-146	95.72	-	-	-	-	-	-	-	-	-	-
HORVU.MOREX.r3.5HG0530540.1	0	0	15.3229	19.2514	8.64356	0	17.2871	Inf	Inf	0.00941741	0.0961562	hypothetical protein ZWY2020_035460	360	20	5.39E-57	89.65	1	C:GO:0016021	C:integral component of membrane	-	-	-	-	-	-	-
HORVU.MOREX.r3.1HG0017960.1	0	0	13.4075	14.4385	6.96151	0	13.923	Inf	Inf	0.018783	0.152313	protein MAIN-LIKE 2-like	417	20	8.02E-95	97.12	1	P:GO:0010073	P:meristem maintenance	-	-	-	-	-	-	-
HORVU.MOREX.r3.4HG0345640.1	0	0	15.3229	35.2942	12.6543	0	25.3085	Inf	Inf	0.00224017	0.0340653	predicted protein	693	20	1.23E-131	88.79	1	P:GO:0032196	P:transposition	-	-	-	-	-	-	-
HORVU.MOREX.r3.1HG0074470.1	11.4168	6.1793	226.97	258.289	125.714	8.79803	242.63	27.5777	4.78543	3.24E-07	2.57E-05	predicted protein	663	20	3.41E-152	91.46	1	P:GO:0032196	P:transposition	-	-	-	-	-	-	-
HORVU.MOREX.r3.7HG0644670.1	0	0	12.4499	28.877	10.3317	0	20.6634	Inf	Inf	0.00559278	0.0664917	WD repeat domain phosphoinositide-interacting protein 3	405	20	6.13E-53	69.97	3	F:GO:0003676; F:GO:0004523; P:GO:0090502	F:nucleic acid binding; F:RNA-DNA hybrid ribonuclease activity; P:RNA phosphodiester bond hydrolysis, endonucleolytic	-	-	-	-	-	-	-
HORVU.MOREX.r3.3HG0218120.1	3.6053	0	29.6881	25.6685	14.7405	1.80265	27.6783	15.3542	3.94057	0.0287504	0.196368	wall-associated receptor kinase 4-like	2601	20	0	63.55	5	F:GO:0004672; F:GO:0005524; P:GO:0006468; C:GO:0016021; F:GO:0030247	F:protein kinase activity; F:ATP binding; P:protein phosphorylation; C:integral component of membrane; F:polysaccharide binding	EC:2.7.1; EC:2.7; EC:2	Transferring phosphorus-containing groups; Transferring phosphorus-containing groups; Transferases	-	-	-	-	-
HORVU.MOREX.r3.3HG0229680.1	0	2.05977	34.4765	54.5455	22.7705	1.02988	44.511	43.2195	5.43361	0.00044661	0.00956529	protein MAIN-LIKE 2-like	417	20	1.15E-96	97.85	1	P:GO:0010073	P:meristem maintenance	-	-	-	-	-	-	-
HORVU.MOREX.r3.4HG0413720.1	0	0	10.5345	14.4385	6.24325	0	12.4865	Inf	Inf	0.0276982	0.192437	cysteine-rich repeat secretory protein 38-like	714	20	3.22E-137	87.6	2	F:GO:0016301; P:GO:0016310	F:kinase activity; P:phosphorylation	EC:2.7; EC:2	Transferring phosphorus-containing groups; Transferases	-	-	-	-	-
HORVU.MOREX.r3.6HG0593910.1	0	0	9.57681	16.0428	6.4049	0	12.8098	Inf	Inf	0.0270218	0.189845	hypothetical protein ZWY2020_032988, partial	690	20	1.36E-136	94.53	-	-	-	-	-	-	-	-	-	-
HORVU.MOREX.r3.6HG0616700.1	0	0	9.57681	11.23	5.20169	0	10.4034	Inf	Inf	0.0429817	0.246587	unnamed protein product	408	20	5.00E-38	77.55	1	C:GO:0016021	C:integral component of membrane	-	-	-	-	-	-	-
HORVU.MOREX.r3.6HG0609400.1	14.4212	8.23907	61.2916	75.4011	39.8382	11.3301	68.3464	6.03227	2.5927	0.0211291	0.163556	cysteine protease XCP1-like	1095	20	0	91.89	4	F:GO:0004197; C:GO:0005615; C:GO:0005764; P:GO:0051603	F:cysteine-type endopeptidase activity; C:extracellular space; C:lysosome; P:proteolysis involved in protein catabolic process	EC:3.4.22; EC:3.4; EC:3	Acting on peptide bonds (peptidases); Acting on peptide bonds (peptidases); Hydrolases	-	-	-	-	-
HORVU.MOREX.r3.1HG0026380.1	0	0	6.70377	20.8556	6.88985	0	13.7797	Inf	Inf	0.0251084	0.181917	putative calcium-binding protein CML16	708	20	9.14E-152	94.4	-	-	-	-	-	-	-	-	-	-
HORVU.MOREX.r3.5HG0512670.1	2.40353	2.05977	47.8841	57.7541	27.5254	2.23165	52.8191	23.6682	4.56488	0.000955501	0.0174147	serine/threonine-protein phosphatase 7 long form homolog isoform X1	1884	20	0	79.56	1	P:GO:0010073	P:meristem maintenance	-	-	-	-	-	-	-
HORVU.MOREX.r3.6HG0561130.1	0	0	18.1959	3.20856	5.35113	0	10.7023	Inf	Inf	0.0288148	0.196593	hypothetical protein ZWY2020_021451, partial	774	20	1.79E-153	95.37	-	-	-	-	-	-	-	-	-	-
HORVU.MOREX.r3.2HG0182630.1	52.2768	35.016	1.91536	19.2514	27.1149	43.6464	10.5834	0.242479	-2.04407	0.0471401	0.259875	caffeoylshikimate esterase-like	1029	20	0	91.94	2	C:GO:0016020; F:GO:0016298	C:membrane; F:lipase activity	EC:3.1; EC:3; EC:3.1.1	Acting on ester bonds; Hydrolases; Acting on ester bonds	-	-	-	K18368	Metabolic pathways; Biosynthesis of secondary metabolites; Phenylpropanoid biosynthesis;
HORVU.MOREX.r3.2HG0216230.1	4.80706	12.3586	444.364	627.273	272.201	8.58283	535.819	62.4291	5.96415	1.13E-10	4.51E-08	auxin response factor 13-like	1590	20	0	82.46	4	F:GO:0003677; C:GO:0005634; P:GO:0006355; P:GO:0009734	F:DNA binding; C:nucleus; P:regulation of DNA-templated transcription; P:auxin-activated signaling pathway	-	-	-	-	-	-	-
HORVU.MOREX.r3.5HG0537240.1	0	2.05977	23.942	72.1926	24.5486	1.02988	48.0673	46.6726	5.5445	0.000350539	0.00782927	protein ALP1-like	216	20	4.40E-40	95.44	4	F:GO:0004518; C:GO:0005634; F:GO:0046872; P:GO:0090305	F:nuclease activity; C:nucleus; F:metal ion binding; P:nucleic acid phosphodiester bond hydrolysis	EC:3.1; EC:3	Acting on ester bonds; Hydrolases	-	-	-	-	-
HORVU.MOREX.r3.5HG0454140.1	10.215	7.20919	198.24	298.396	128.515	8.71209	248.318	28.5027	4.83303	2.91E-07	2.35E-05	mutator protein	795	20	1.80E-163	93.41	-	-	-	-	-	-	-	-	-	-
HORVU.MOREX.r3.2HG0160850.1	0	3.08965	13.4075	28.877	11.3436	1.54483	21.1423	13.6859	3.77462	0.0384641	0.23209	U-box domain-containing protein 18-like	1953	20	0	82.93	4	F:GO:0004842; C:GO:0005634; C:GO:0005737; P:GO:0016567	F:ubiquitin-protein transferase activity; C:nucleus; C:cytoplasm; P:protein ubiquitination	EC:2	Transferases	-	-	-	-	-
HORVU.MOREX.r3.4HG0394790.1	0	0	12.4499	8.0214	5.11781	0	10.2356	Inf	Inf	0.0393414	0.234904	hypothetical protein ZWY2020_045646	591	20	2.36E-92	95.1	-	-	-	-	-	-	-	-	-	-
HORVU.MOREX.r3.3HG0219350.1	0	0	21.069	11.23	8.07474	0	16.1495	Inf	Inf	0.00950136	0.0968056	wax ester synthase/diacylglycerol acyltransferase 11-like	1548	20	0	92.74	5	F:GO:0004144; C:GO:0005886; C:GO:0016021; P:GO:0019432; F:GO:0047196	F:diacylglycerol O-acyltransferase activity; C:plasma membrane; C:integral component of membrane; P:triglyceride biosynthetic process; F:long-chain-alcohol O-fatty-acyltransferase activity	EC:2.3; EC:2.3.1.20; EC:2.3.1.75; EC:2; EC:2.3.1	Acyltransferases; Diacylglycerol O-acyltransferase; Long-chain-alcohol O-fatty-acyltransferase; Transferases; Acyltransferases	-	-	-	-	-
HORVU.MOREX.r3.7HG0704870.1	4.80706	3.08965	79.4875	123.53	52.7284	3.94836	101.509	25.7091	4.68421	3.75E-05	0.00129014	hypothetical protein ZWY2020_037752	576	20	4.77E-52	90.48	-	-	-	-	-	-	-	-	-	-
HORVU.MOREX.r3.4HG0341310.1	32.4477	28.8367	317.95	423.53	200.691	30.6422	370.74	12.099	3.59682	2.18E-05	0.000814694	probable E3 ubiquitin-protein ligase ARI1	1629	20	0	84.44	7	C:GO:0000151; P:GO:0000209; C:GO:0005737; F:GO:0031624; P:GO:0032436; F:GO:0046872; F:GO:0061630	C:ubiquitin ligase complex; P:protein polyubiquitination; C:cytoplasm; F:ubiquitin conjugating enzyme binding; P:positive regulation of proteasomal ubiquitin-dependent protein catabolic process; F:metal ion binding; F:ubiquitin protein ligase activity	EC:2	Transferases	-	-	-	-	-
HORVU.MOREX.r3.4HG0346130.1	3.00441	0	127.372	224.599	88.7438	1.50221	175.985	117.151	6.87223	4.48E-09	7.58E-07	predicted protein	747	20	7.21E-167	90.96	1	P:GO:0032196	P:transposition	-	-	-	-	-	-	-
HORVU.MOREX.r3.5HG0439710.1	0	0	43.0957	67.3797	27.6189	0	55.2377	Inf	Inf	6.45E-06	0.000303355	uncharacterized protein LOC123395617	1596	20	0	71.81	2	F:GO:0003700; P:GO:0006355	F:DNA-binding transcription factor activity; P:regulation of DNA-templated transcription	-	-	-	-	-	-	-
HORVU.MOREX.r3.6HG0583910.1	2.40353	0	46.9264	68.984	29.5785	1.20177	57.9552	48.2251	5.59171	0.000209883	0.00524109	hypothetical protein ZWY2020_047919	339	20	3.30E-75	85.68	3	F:GO:0003676; F:GO:0004523; P:GO:0090502	F:nucleic acid binding; F:RNA-DNA hybrid ribonuclease activity; P:RNA phosphodiester bond hydrolysis, endonucleolytic	EC:3.1.30; EC:3.1; EC:3; EC:3.1.26; EC:3.1.26.4	Acting on ester bonds; Acting on ester bonds; Hydrolases; Acting on ester bonds; Ribonuclease H	-	-	-	-	-
HORVU.MOREX.r3.4HG0388980.2	97.343	98.8688	29.6881	19.2514	61.2878	98.1059	24.4697	0.249422	-2.00334	0.0372123	0.227222	tropinone reductase homolog At5g06060-like	819	20	0	95.58	2	C:GO:0016021; F:GO:0016491	C:integral component of membrane; F:oxidoreductase activity	EC:1	Oxidoreductases	-	-	-	K08081	Metabolic pathways; Biosynthesis of secondary metabolites; Tropane, piperidine and pyridine alkaloid biosynthesis;
HORVU.MOREX.r3.4HG0413170.1	3.6053	6.1793	81.4029	83.4225	43.6525	4.8923	82.4127	16.8454	4.07428	0.000220324	0.00542431	pentatricopeptide repeat-containing protein	1260	20	0	91.48	-	-	-	-	-	-	-	-	-	-
HORVU.MOREX.r3.1HG0079880.1	145.414	192.588	34.4765	9.62568	95.526	169.001	22.0511	0.130479	-2.93811	0.00170057	0.0276756	probable polygalacturonase At1g80170 isoform X2	1470	20	0	95.73	2	F:GO:0004650; P:GO:0005975	F:polygalacturonase activity; P:carbohydrate metabolic process	EC:3.2; EC:3; EC:3.2.1.15; EC:3.2.1	Glycosylases; Hydrolases; Polygalacturonase; Glycosylases	-	-	-	K01213	Metabolic pathways; Pentose and glucuronate interconversions;
HORVU.MOREX.r3.6HG0606820.1	0	0	13.4075	14.4385	6.96151	0	13.923	Inf	Inf	0.018783	0.152313	protein MAIN-LIKE 2-like	417	20	2.02E-96	97.85	1	P:GO:0010073	P:meristem maintenance	-	-	-	-	-	-	-
HORVU.MOREX.r3.3HG0222310.1	2.40353	2.05977	126.414	186.096	79.2434	2.23165	156.255	70.0178	6.12965	3.00E-08	3.62E-06	uncharacterized protein LOC123439192	1872	20	0	70.15	1	C:GO:0016020	C:membrane	-	-	-	-	-	-	-
HORVU.MOREX.r3.1HG0043030.1	0	0	32.5612	57.7541	22.5788	0	45.1576	Inf	Inf	4.38E-05	0.00147041	predicted protein	774	20	6.49E-151	86.8	1	P:GO:0032196	P:transposition	-	-	-	-	-	-	-
HORVU.MOREX.r3.5HG0458810.1	0.600883	2.05977	199.198	259.893	115.438	1.33032	229.546	172.548	7.43086	2.12E-11	1.47E-08	DDE-type integrase/transposase/recombinase	342	20	5.62E-47	79.26	2	F:GO:0003676; P:GO:0015074	F:nucleic acid binding; P:DNA integration	-	-	-	-	-	-	-
HORVU.MOREX.r3.3HG0249480.1	0	5.14942	52.6725	70.5883	32.1025	2.57471	61.6304	23.9368	4.58116	0.000196553	0.00497946	putative ubiquitin-conjugating enzyme E2 38 isoform X1	1104	20	0	91.41	2	P:GO:0016567; F:GO:0061631	P:protein ubiquitination; F:ubiquitin conjugating enzyme activity	EC:2; EC:2.3.2.23	Transferases; E2 ubiquitin-conjugating enzyme	-	-	-	K10581	Ubiquitin mediated proteolysis;
HORVU.MOREX.r3.1HG0020280.1	235.546	200.827	33.5188	51.3369	130.307	218.187	42.4279	0.194457	-2.36248	0.00250746	0.037123	pentatricopeptide repeat-containing protein At4g35850, mitochondrial	1362	20	0	96.54	1	F:GO:0003729	F:mRNA binding	-	-	-	-	-	-	-
HORVU.MOREX.r3.7HG0655040.1	4.20618	0	27.7728	36.8984	17.2193	2.10309	32.3356	15.3753	3.94254	0.023328	0.173888	U-box domain-containing protein 70-like	1782	20	0	84.47	5	F:GO:0004672; F:GO:0004842; F:GO:0005524; P:GO:0006468; P:GO:0016567	F:protein kinase activity; F:ubiquitin-protein transferase activity; F:ATP binding; P:protein phosphorylation; P:protein ubiquitination	EC:2.7.1; EC:2.7; EC:2	Transferring phosphorus-containing groups; Transferring phosphorus-containing groups; Transferases	-	-	-	-	-
HORVU.MOREX.r3.1HG0059090.1	40.2591	47.3746	1309.15	2234.76	907.886	43.8169	1771.96	40.44	5.33771	4.46E-08	5.00E-06	ADP-ribosylation factor-related protein 1	939	20	1.00E-141	83.87	-	-	-	-	-	-	-	-	-	-
HORVU.MOREX.r3.6HG0558690.1	0	2.05977	22.9844	20.8556	11.4749	1.02988	21.92	21.284	4.41169	0.016455	0.140441	polynucleotide 5'-hydroxyl-kinase NOL9-like	1149	20	0	94.82	5	P:GO:0000448; F:GO:0005524; C:GO:0005634; P:GO:0016310; F:GO:0051731	P:cleavage in ITS2 between 5.8S rRNA and LSU-rRNA of tricistronic rRNA transcript (SSU-rRNA, 5.8S rRNA, LSU-rRNA); F:ATP binding; C:nucleus; P:phosphorylation; F:polynucleotide 5'-hydroxyl-kinase activity	EC:2.7.1; EC:2.7; EC:2	Transferring phosphorus-containing groups; Transferring phosphorus-containing groups; Transferases	-	-	-	-	-
HORVU.MOREX.r3.2HG0152650.1	0	0	13.4075	6.41712	4.95616	0	9.91233	Inf	Inf	0.0402012	0.238011	hypothetical protein D1007_36211	345	20	3.64E-72	79.92	-	-	-	-	-	-	-	-	-	-
HORVU.MOREX.r3.5HG0507690.1	0	0	13.4075	25.6685	9.769	0	19.538	Inf	Inf	0.00665211	0.075244	hypothetical protein D1007_57486	213	20	4.01E-26	80.33	-	-	-	-	-	-	-	-	-	-
HORVU.MOREX.r3.7HG0659610.1	1.20177	4.11953	42.138	32.0856	19.8862	2.66065	37.1118	13.9484	3.80203	0.00685824	0.0767947	putative leucine-rich repeat receptor-like serine/threonine-protein kinase At2g24130	3015	20	0	91.52	4	F:GO:0004672; F:GO:0005524; P:GO:0006468; C:GO:0016021	F:protein kinase activity; F:ATP binding; P:protein phosphorylation; C:integral component of membrane	EC:2.7.1; EC:2.7; EC:2	Transferring phosphorus-containing groups; Transferring phosphorus-containing groups; Transferases	-	-	-	-	-
HORVU.MOREX.r3.6HG0599970.1	0	0	17.2383	20.8556	9.52347	0	19.0469	Inf	Inf	0.00638692	0.0731598	DNA mismatch repair protein Msh6-1	522	20	1.15E-90	95.94	-	-	-	-	-	-	-	-	-	-
HORVU.MOREX.r3.3HG0249660.1	0	0	19.1536	41.7113	15.2162	0	30.4324	Inf	Inf	0.000833774	0.0156052	putative calcium-binding protein CML16	708	20	9.29E-144	95.2	-	-	-	-	-	-	-	-	-	-
HORVU.MOREX.r3.3HG0254180.1	0	0	18.1959	22.4599	10.164	0	20.3279	Inf	Inf	0.00489721	0.0605818	protein FAR1-RELATED SEQUENCE 1-like	621	20	3.47E-140	87.09	-	-	-	-	-	-	-	-	-	-
HORVU.MOREX.r3.3HG0239060.1	71.505	61.793	2977.43	4891.45	2000.54	66.649	3934.44	59.0322	5.88343	1.97E-07	1.70E-05	DDE-type integrase/transposase/recombinase	3984	20	0	77.76	4	F:GO:0003676; F:GO:0008270; P:GO:0015074; F:GO:0016740	F:nucleic acid binding; F:zinc ion binding; P:DNA integration; F:transferase activity	EC:2	Transferases	-	-	-	-	-
HORVU.MOREX.r3.5HG0529550.1	2.40353	4.11953	22.9844	52.9412	20.6122	3.26153	37.9628	11.6396	3.54096	0.0175207	0.14576	putative disease resistance protein RGA1	3435	20	0	82.93	2	P:GO:0006952; F:GO:0043531	P:defense response; F:ADP binding	-	-	-	-	-	-	-
HORVU.MOREX.r3.3HG0228760.1	2.40353	6.1793	48.8417	51.3369	27.1904	4.29142	50.0893	11.672	3.54498	0.0042504	0.0546137	lysine-rich arabinogalactan protein 19-like isoform X1	831	20	1.57E-138	69.13	-	-	-	-	-	-	-	-	-	-
HORVU.MOREX.r3.1HG0021220.1	13.2194	3.08965	90.022	96.2568	50.647	8.15453	93.1394	11.4218	3.51372	0.00131871	0.0225562	L10-interacting MYB domain-containing protein-like	1473	20	0	81.24	-	-	-	-	-	-	-	-	-	-
HORVU.MOREX.r3.5HG0495370.1	0	0	12.4499	33.6899	11.5349	0	23.0699	Inf	Inf	0.00363148	0.0486248	mutator protein	810	20	5.17E-169	94.2	-	-	-	-	-	-	-	-	-	-
HORVU.MOREX.r3.3HG0262550.1	0.600883	0	19.1536	20.8556	10.1525	0.300441	20.0046	66.5842	6.05711	0.0136294	0.124263	putative calcium-binding protein CML16	708	20	5.64E-152	94.96	-	-	-	-	-	-	-	-	-	-
HORVU.MOREX.r3.1HG0037200.1	1.20177	2.05977	31.6035	43.3156	19.5451	1.63077	37.4595	22.9705	4.52171	0.00417082	0.0538863	vicilin-like seed storage protein At2g18540	447	20	6.78E-55	91.52	-	-	-	-	-	-	-	-	-	-
HORVU.MOREX.r3.7HG0637440.1	4.80706	6.1793	39.2649	57.7541	27.0013	5.49318	48.5095	8.83086	3.14255	0.0140048	0.126306	haloacid dehalogenase-like hydrolase domain-containing protein Sgpp	765	20	1.99E-169	89.42	-	-	-	-	-	-	-	-	-	-
HORVU.MOREX.r3.2HG0174190.1	0	0	6.70377	35.2942	10.4995	0	20.999	Inf	Inf	0.00644334	0.0736648	putative calcium-binding protein CML16	708	20	6.38E-146	94.23	-	-	-	-	-	-	-	-	-	-
HORVU.MOREX.r3.3HG0246740.1	0	0	10.5345	9.62568	5.04004	0	10.0801	Inf	Inf	0.0438861	0.249841	cell division control protein 48 homolog D-like	2367	20	0	98.19	11	F:GO:0005524; C:GO:0005634; C:GO:0005829; F:GO:0016887; P:GO:0030433; P:GO:0030970; F:GO:0031593; C:GO:0034098; P:GO:0051228; P:GO:0071712; P:GO:0097352	F:ATP binding; C:nucleus; C:cytosol; F:ATP hydrolysis activity; P:ubiquitin-dependent ERAD pathway; P:retrograde protein transport, ER to cytosol; F:polyubiquitin modification-dependent protein binding; C:VCP-NPL4-UFD1 AAA ATPase complex; P:mitotic spindle disassembly; P:ER-associated misfolded protein catabolic process; P:autophagosome maturation	EC:3.6.1; EC:3.6; EC:3; EC:3.6.1.15	Acting on acid anhydrides; Acting on acid anhydrides; Hydrolases; Nucleoside-triphosphate phosphatase	-	-	-	-	-
HORVU.MOREX.r3.7HG0646420.1	29.4432	26.777	219.309	296.792	143.08	28.1101	258.05	9.17999	3.19849	0.000177728	0.00460193	NBS-LRR disease resistance protein	813	20	6.48E-121	78.27	5	P:GO:0009987; C:GO:0016021; F:GO:0016757; P:GO:0043170; P:GO:0044238	P:cellular process; C:integral component of membrane; F:glycosyltransferase activity; P:macromolecule metabolic process; P:primary metabolic process	EC:2.4; EC:2	Glycosyltransferases; Transferases	-	-	-	-	-
HORVU.MOREX.r3.3HG0266250.1	0	0	35.4342	56.1498	22.896	0	45.792	Inf	Inf	3.64E-05	0.00125826	predicted protein	693	20	1.56E-129	88.09	1	P:GO:0032196	P:transposition	-	-	-	-	-	-	-
HORVU.MOREX.r3.5HG0480690.1	5.40794	4.11953	123.541	157.219	72.5719	4.76374	140.38	29.4685	4.8811	2.49E-06	0.00013708	predicted protein	660	20	1.17E-133	85.25	1	P:GO:0032196	P:transposition	-	-	-	-	-	-	-
HORVU.MOREX.r3.1HG0018770.1	0	0	51.7148	81.8183	33.3833	0	66.7665	Inf	Inf	9.78E-07	6.53E-05	predicted protein	672	20	3.87E-147	90.88	1	P:GO:0032196	P:transposition	-	-	-	-	-	-	-
HORVU.MOREX.r3.2HG0163510.1	28.2415	22.6574	240.378	364.171	163.862	25.4495	302.275	11.8775	3.57015	3.81E-05	0.00130886	Ycf2 protein	570	20	1.04E-132	96.93	3	F:GO:0000166; C:GO:0009507; C:GO:0016021	F:nucleotide binding; C:chloroplast; C:integral component of membrane	-	-	-	-	-	-	-
HORVU.MOREX.r3.3HG0253110.1	14.4212	6.1793	78.5299	75.4011	43.6329	10.3002	76.9655	7.4722	2.90153	0.00787987	0.0849899	uncharacterized protein LOC123439754	912	20	2.44E-105	79.48	1	C:GO:0016021	C:integral component of membrane	-	-	-	-	-	-	-
HORVU.MOREX.r3.1HG0069660.1	0	0	22.9844	22.4599	11.3611	0	22.7221	Inf	Inf	0.00274477	0.0398501	Sigma factor binding protein 1, chloroplastic	465	20	4.70E-57	71.32	1	P:GO:0051091	P:positive regulation of DNA-binding transcription factor activity	-	-	-	-	-	-	-
HORVU.MOREX.r3.7HG0679390.1	1.20177	0	39.2649	81.8183	30.5712	0.600883	60.5416	100.754	6.6547	4.36E-05	0.00146767	L10-interacting MYB domain-containing protein-like	1053	20	0	71.92	2	F:GO:0004518; P:GO:0090305	F:nuclease activity; P:nucleic acid phosphodiester bond hydrolysis	-	-	-	-	-	-	-
HORVU.MOREX.r3.4HG0354890.1	21.6318	12.3586	1429.82	2229.95	923.439	16.9952	1829.88	107.671	6.75048	1.49E-10	5.44E-08	transposase family protein	807	20	6.74E-170	86.75	2	F:GO:0003676; P:GO:0015074	F:nucleic acid binding; P:DNA integration	-	-	-	-	-	-	-
HORVU.MOREX.r3.5HG0455920.1	6.60971	2.05977	113.006	166.845	72.1302	4.33474	139.926	32.2801	5.01257	3.03E-06	0.000159924	hypothetical protein ZWY2020_009761	573	20	3.10E-69	87.01	-	-	-	-	-	-	-	-	-	-
HORVU.MOREX.r3.4HG0383210.1	0	0	9.57681	20.8556	7.60811	0	15.2162	Inf	Inf	0.017022	0.142973	uncharacterized protein LOC123450592	954	20	0	97.55	-	-	-	-	-	-	-	-	-	-
HORVU.MOREX.r3.1HG0019050.1	0	1.02988	43.0957	80.214	31.0849	0.514942	61.6548	119.732	6.90366	1.18E-05	0.000494345	hypothetical protein ZWY2020_032988, partial	705	20	2.56E-139	95.45	-	-	-	-	-	-	-	-	-	-
HORVU.MOREX.r3.4HG0384470.1	0	4.11953	18.1959	28.877	12.7981	2.05977	23.5365	11.4268	3.51435	0.0346734	0.218499	trihelix transcription factor ASIL1-like	756	20	3.55E-141	68.65	-	-	-	-	-	-	-	-	-	-
HORVU.MOREX.r3.5HG0501290.1	0	0	17.2383	19.2514	9.1224	0	18.2448	Inf	Inf	0.0073981	0.0808857	thaumatin-like protein 1b	840	20	8.02E-155	90.65	1	P:GO:0006952	P:defense response	-	-	-	-	-	-	-
HORVU.MOREX.r3.1HG0000270.1	60.6891	45.3149	4.78841	3.20856	28.5002	53.002	3.99848	0.0754402	-3.72852	0.00450314	0.0569836	hypothetical protein D1007_61727	276	9	1.24E-32	73.99	1	P:GO:0006952	P:defense response	-	-	-	-	-	-	-
HORVU.MOREX.r3.5HG0461630.1	1.20177	0	11.4922	24.0642	9.18953	0.600883	17.7782	29.5868	4.88688	0.044464	0.251643	hypothetical protein ZWY2020_054565	576	20	5.10E-68	89.92	-	-	-	-	-	-	-	-	-	-
HORVU.MOREX.r3.2HG0180580.1	321.472	251.292	42.138	32.0856	161.747	286.382	37.1118	0.129588	-2.94799	0.000331099	0.00747251	proliferating cell nuclear antigen	792	20	0	99	13	F:GO:0003682; F:GO:0003684; F:GO:0005515; P:GO:0006272; P:GO:0006298; P:GO:0019985; F:GO:0030337; P:GO:0034644; C:GO:0043626; P:GO:0045739; P:GO:0045740; P:GO:0050790; P:GO:0070207	F:chromatin binding; F:damaged DNA binding; F:protein binding; P:leading strand elongation; P:mismatch repair; P:translesion synthesis; F:DNA polymerase processivity factor activity; P:cellular response to UV; C:PCNA complex; P:positive regulation of DNA repair; P:positive regulation of DNA replication; P:regulation of catalytic activity; P:protein homotrimerization	-	-	-	-	-	K04802	DNA replication; Base excision repair; Nucleotide excision repair; Mismatch repair; Cell cycle;
HORVU.MOREX.r3.7HG0662590.1	1.80265	1.02988	294.008	402.674	174.879	1.41627	348.341	245.958	7.94227	7.13E-13	1.79E-09	DDE-type integrase/transposase/recombinase	315	20	2.23E-67	89.78	2	F:GO:0003676; P:GO:0015074	F:nucleic acid binding; P:DNA integration	-	-	-	-	-	-	-
HORVU.MOREX.r3.2HG0128480.1	0	0	4.78841	19.2514	6.00994	0	12.0199	Inf	Inf	0.0386167	0.23209	putative calcium-binding protein CML16	708	20	3.86E-146	93.92	-	-	-	-	-	-	-	-	-	-
HORVU.MOREX.r3.3HG0302320.1	3.00441	1.02988	27.7728	33.6899	16.3742	2.01715	30.7313	15.235	3.92932	0.0213871	0.164714	hypothetical protein ZWY2020_029357	576	20	4.75E-66	86.95	-	-	-	-	-	-	-	-	-	-
HORVU.MOREX.r3.1HG0079340.1	7.21059	8.23907	99.5989	134.759	62.452	7.72483	117.179	15.1692	3.92307	0.000103631	0.00298606	putative nuclease HARBI1	450	20	4.92E-74	82.21	4	F:GO:0004518; C:GO:0005634; F:GO:0046872; P:GO:0090305	F:nuclease activity; C:nucleus; F:metal ion binding; P:nucleic acid phosphodiester bond hydrolysis	EC:3.1; EC:3	Acting on ester bonds; Hydrolases	-	-	-	-	-
HORVU.MOREX.r3.7HG0674020.1	0	0	17.2383	30.4813	11.9299	0	23.8598	Inf	Inf	0.00270319	0.039353	predicted protein	612	20	1.46E-118	91.09	1	P:GO:0032196	P:transposition	-	-	-	-	-	-	-
HORVU.MOREX.r3.2HG0100510.1	0	0	23.942	22.4599	11.6005	0	23.201	Inf	Inf	0.00245258	0.0364393	hypothetical protein ZWY2020_043005	591	20	1.18E-90	94.3	-	-	-	-	-	-	-	-	-	-
HORVU.MOREX.r3.7HG0637410.1	0	0	3.83073	25.6685	7.3748	0	14.7496	Inf	Inf	0.0234085	0.173965	F-box protein At1g52495-like	1281	20	0	83.08	-	-	-	-	-	-	-	-	-	-
HORVU.MOREX.r3.6HG0628500.1	27.0397	8.23907	149.398	248.663	108.335	17.6394	199.031	11.2833	3.49612	0.000209951	0.00524109	uncharacterized protein LOC120964517	822	20	2.15E-180	90.46	-	-	-	-	-	-	-	-	-	-
HORVU.MOREX.r3.4HG0350370.1	10.215	4.11953	57.4609	85.0268	39.2056	7.16727	71.2439	9.94017	3.31327	0.00525948	0.0636991	ATP-dependent DNA helicase PIF1-like isoform X1	2379	20	0	80.56	-	-	-	-	-	-	-	-	-	-
HORVU.MOREX.r3.3HG0223830.1	1.20177	0	47.8841	12.8342	15.48	0.600883	30.3592	50.5243	5.6589	0.00263953	0.0386059	Beta-fructofuranosidase, insoluble isoenzyme 3	2166	20	0	76.72	-	-	-	-	-	-	-	-	-	-
HORVU.MOREX.r3.7HG0641960.1	0	0	15.3229	44.9198	15.0607	0	30.1214	Inf	Inf	0.000987882	0.0178661	beta-galactosidase 12-like	2514	20	0	94.34	5	F:GO:0004565; C:GO:0005773; P:GO:0005975; F:GO:0030246; C:GO:0048046	F:beta-galactosidase activity; C:vacuole; P:carbohydrate metabolic process; F:carbohydrate binding; C:apoplast	EC:3.2; EC:3; EC:3.2.1.23; EC:3.2.1	Glycosylases; Hydrolases; Beta-galactosidase; Glycosylases	-	-	-	-	-
HORVU.MOREX.r3.7HG0648310.1	0	0	11.4922	8.0214	4.87839	0	9.75679	Inf	Inf	0.0448392	0.252662	homeobox-leucine zipper protein ROC8-like	372	20	1.54E-55	74.25	6	F:GO:0000981; F:GO:0003677; C:GO:0005634; P:GO:0006355; P:GO:0006357; F:GO:0008289	F:DNA-binding transcription factor activity, RNA polymerase II-specific; F:DNA binding; C:nucleus; P:regulation of DNA-templated transcription; P:regulation of transcription by RNA polymerase II; F:lipid binding	-	-	-	-	-	-	-
HORVU.MOREX.r3.7HG0750810.1	1422.29	1487.15	324.654	335.294	892.347	1454.72	329.974	0.22683	-2.14032	0.0103269	0.102683	callose synthase 3-like	5892	20	0	97.42	6	C:GO:0000148; F:GO:0003843; P:GO:0006075; P:GO:0008360; C:GO:0016021; P:GO:0071555	C:1,3-beta-D-glucan synthase complex; F:1,3-beta-D-glucan synthase activity; P:(1->3)-beta-D-glucan biosynthetic process; P:regulation of cell shape; C:integral component of membrane; P:cell wall organization	EC:2.4.1.34; EC:2.4; EC:2; EC:2.4.1	1,3-beta-glucan synthase; Glycosyltransferases; Transferases; Glycosyltransferases	-	-	-	-	-
HORVU.MOREX.r3.2HG0136730.1	0	0	13.4075	20.8556	8.56579	0	17.1316	Inf	Inf	0.0103681	0.102683	hypothetical protein ZWY2020_032988, partial	690	20	3.18E-140	96.28	-	-	-	-	-	-	-	-	-	-
HORVU.MOREX.r3.6HG0624070.1	0	0	9.57681	12.8342	5.60276	0	11.2055	Inf	Inf	0.0369057	0.226003	predicted protein	1191	20	0	78.76	-	-	-	-	-	-	-	-	-	-
HORVU.MOREX.r3.3HG0241890.1	6.00883	1.02988	62.2493	97.8611	41.7873	3.51935	80.0552	22.7471	4.50761	0.000296335	0.0068383	protein MAIN-LIKE 1-like isoform X1	789	20	1.69E-174	92.11	-	-	-	-	-	-	-	-	-	-
HORVU.MOREX.r3.7HG0701540.1	1.20177	0	20.1113	51.3369	18.1625	0.600883	35.7241	59.4528	5.89367	0.00254296	0.0374868	hypothetical protein ZWY2020_032988, partial	774	20	1.95E-156	95.16	-	-	-	-	-	-	-	-	-	-
HORVU.MOREX.r3.6HG0547060.1	1.20177	4.11953	14.3652	49.7327	17.3548	2.66065	32.0489	12.0455	3.59043	0.0257751	0.184821	putative disease resistance protein RGA4	2928	20	0	80.47	6	F:GO:0004518; C:GO:0005634; P:GO:0006952; F:GO:0043531; F:GO:0046872; P:GO:0090305	F:nuclease activity; C:nucleus; P:defense response; F:ADP binding; F:metal ion binding; P:nucleic acid phosphodiester bond hydrolysis	EC:3.1; EC:3	Acting on ester bonds; Hydrolases	-	-	-	-	-
HORVU.MOREX.r3.1HG0074490.1	32.4477	56.6436	2.87304	0	22.9911	44.5456	1.43652	0.0322483	-4.95463	0.00290998	0.0416528	histone H4	312	20	4.12E-50	100	7	C:GO:0000786; F:GO:0003677; C:GO:0005634; P:GO:0006334; P:GO:0006352; P:GO:0009414; F:GO:0046982	C:nucleosome; F:DNA binding; C:nucleus; P:nucleosome assembly; P:DNA-templated transcription initiation; P:response to water deprivation; F:protein heterodimerization activity	-	-	-	-	-	K11254	-
HORVU.MOREX.r3.3HG0244000.1	21.0309	27.8069	105.345	112.3	66.6206	24.4189	108.822	4.45648	2.15591	0.0153983	0.134731	beta-glucuronosyltransferase GlcAT14B-like	1521	20	0	87.6	2	F:GO:0015020; C:GO:0016021	F:glucuronosyltransferase activity; C:integral component of membrane	EC:2.4; EC:2; EC:2.4.1.17; EC:2.4.1	Glycosyltransferases; Transferases; Glucuronosyltransferase; Glycosyltransferases	-	-	-	-	-
HORVU.MOREX.r3.2HG0173680.1	233.142	187.439	885.855	904.814	552.813	210.291	895.334	4.25761	2.09004	0.0100756	0.100876	anthranilate synthase beta subunit 1, chloroplastic-like	1011	20	0	94.14	2	P:GO:0000162; F:GO:0004049	P:tryptophan biosynthetic process; F:anthranilate synthase activity	EC:4.1; EC:4.1.3.27; EC:4; EC:4.1.3	Carbon-carbon lyases; Anthranilate synthase; Lyases; Carbon-carbon lyases	-	-	-	K01658	Metabolic pathways; Biosynthesis of secondary metabolites; Biosynthesis of amino acids; Phenylalanine, tyrosine and tryptophan biosynthesis; Phenazine biosynthesis; Quorum sensing; Biofilm formation - Pseudomonas aeruginosa;
HORVU.MOREX.r3.7HG0635640.1	6.00883	1.02988	49.7994	72.1926	32.2577	3.51935	60.996	17.3316	4.11533	0.0019722	0.0309299	Tyrosine-sulfated glycopeptide receptor 1	612	20	3.91E-126	89.91	-	-	-	-	-	-	-	-	-	-
HORVU.MOREX.r3.4HG0340500.1	0	0	8.61913	22.4599	7.76976	0	15.5395	Inf	Inf	0.0166226	0.141326	rRNA N-glycosidase	447	20	9.98E-51	72.86	1	F:GO:0016787	F:hydrolase activity	EC:3	Hydrolases	-	-	-	-	-
HORVU.MOREX.r3.4HG0399520.1	4.80706	2.05977	24.8997	48.1284	19.9737	3.43341	36.5141	10.6349	3.41074	0.0302736	0.202071	wall-associated receptor kinase 2-like	2130	20	0	90.52	8	F:GO:0004674; F:GO:0005509; F:GO:0005524; C:GO:0005886; P:GO:0006468; P:GO:0007166; C:GO:0016021; F:GO:0030247	F:protein serine/threonine kinase activity; F:calcium ion binding; F:ATP binding; C:plasma membrane; P:protein phosphorylation; P:cell surface receptor signaling pathway; C:integral component of membrane; F:polysaccharide binding	EC:2.7.1; EC:2.7; EC:2	Transferring phosphorus-containing groups; Transferring phosphorus-containing groups; Transferases	-	-	-	-	-
HORVU.MOREX.r3.6HG0571870.1	1.20177	0	12.4499	22.4599	9.02788	0.600883	17.4549	29.0487	4.8604	0.045138	0.253812	putative ubiquitin-like-specific protease 1B	387	20	5.21E-52	58.53	-	-	-	-	-	-	-	-	-	-
HORVU.MOREX.r3.6HG0541590.1	4.80706	6.1793	37.3496	64.1712	28.1268	5.49318	50.7604	9.24062	3.20799	0.0120171	0.113877	U-box domain-containing protein 52-like	2157	20	0	79.86	5	F:GO:0004672; F:GO:0004842; F:GO:0005524; P:GO:0006468; P:GO:0016567	F:protein kinase activity; F:ubiquitin-protein transferase activity; F:ATP binding; P:protein phosphorylation; P:protein ubiquitination	EC:2.7.1; EC:2.7; EC:2	Transferring phosphorus-containing groups; Transferring phosphorus-containing groups; Transferases	-	-	-	-	-
HORVU.MOREX.r3.7HG0716650.1	0	0	9.57681	25.6685	8.81132	0	17.6226	Inf	Inf	0.0108806	0.106356	hypothetical protein ZWY2020_009761	561	20	8.84E-68	83.25	-	-	-	-	-	-	-	-	-	-
HORVU.MOREX.r3.3HG0225760.1	0	2.05977	17.2383	27.2728	11.6427	1.02988	22.2555	21.6097	4.43361	0.0187327	0.152037	ABC transporter G family member 5-like	2007	20	0	87.46	4	F:GO:0005524; C:GO:0016021; P:GO:0055085; F:GO:0140359	F:ATP binding; C:integral component of membrane; P:transmembrane transport; F:ABC-type transporter activity	EC:7	n/a	-	-	-	-	-
HORVU.MOREX.r3.2HG0159040.1	186.274	157.572	22.0267	32.0856	99.4895	171.923	27.0561	0.157374	-2.66773	0.00127803	0.0220716	transcription factor BHLH6-like	834	20	1.02E-143	90.8	10	F:GO:0000976; F:GO:0003700; C:GO:0005634; C:GO:0005737; P:GO:0006355; P:GO:0009867; F:GO:0042803; P:GO:0048831; P:GO:0055062; P:GO:0080040	F:transcription cis-regulatory region binding; F:DNA-binding transcription factor activity; C:nucleus; C:cytoplasm; P:regulation of DNA-templated transcription; P:jasmonic acid mediated signaling pathway; F:protein homodimerization activity; P:regulation of shoot system development; P:phosphate ion homeostasis; P:positive regulation of cellular response to phosphate starvation	-	-	-	-	-	-	-
HORVU.MOREX.r3.2HG0188710.1	105.755	87.5401	13.4075	9.62568	54.0822	96.6477	11.5166	0.119161	-3.06902	0.00251772	0.0372156	putative bHLH domain protein	1686	20	0	92.71	1	F:GO:0046983	F:protein dimerization activity	-	-	-	-	-	-	-
HORVU.MOREX.r3.3HG0253530.1	0	0	11.4922	33.6899	11.2955	0	22.591	Inf	Inf	0.00408269	0.0530214	heat shock cognate 70 kDa protein-like	1614	20	0	80.79	3	F:GO:0005524; F:GO:0016887; C:GO:0110165	F:ATP binding; F:ATP hydrolysis activity; C:cellular anatomical entity	EC:3.6.1; EC:3.6; EC:3; EC:3.6.1.15	Acting on acid anhydrides; Acting on acid anhydrides; Hydrolases; Nucleoside-triphosphate phosphatase	-	-	-	-	-
HORVU.MOREX.r3.7HG0686800.1	16.2238	12.3586	80.4452	94.6525	50.92	14.2912	87.5489	6.12606	2.61496	0.0104391	0.103033	L10-interacting MYB domain-containing protein-like	1203	20	0	80.07	-	-	-	-	-	-	-	-	-	-
HORVU.MOREX.r3.1HG0082860.1	6.00883	8.23907	27.7728	110.695	38.179	7.12395	69.234	9.71849	3.28073	0.00675271	0.0761353	alpha-glucan water dikinase, chloroplastic-like	3888	20	0	95.95	3	F:GO:0005524; F:GO:0016301; P:GO:0016310	F:ATP binding; F:kinase activity; P:phosphorylation	EC:2.7; EC:2	Transferring phosphorus-containing groups; Transferases	-	-	-	-	-
HORVU.MOREX.r3.4HG0411380.1	2.40353	4.11953	117.795	166.845	72.7907	3.26153	142.32	43.6359	5.44744	2.77E-07	2.27E-05	putative G-type lectin S-receptor-like serine/threonine-protein kinase At1g61610	2556	20	0	79.89	8	F:GO:0004674; F:GO:0004712; F:GO:0005524; C:GO:0005886; P:GO:0006468; C:GO:0016021; P:GO:0048544; F:GO:0106310	F:protein serine/threonine kinase activity; F:protein serine/threonine/tyrosine kinase activity; F:ATP binding; C:plasma membrane; P:protein phosphorylation; C:integral component of membrane; P:recognition of pollen; F:protein serine kinase activity	EC:2.7.1; EC:2.7.12.1; EC:2.7; EC:2	Transferring phosphorus-containing groups; Dual-specificity kinase; Transferring phosphorus-containing groups; Transferases	-	-	-	-	-
HORVU.MOREX.r3.2HG0133540.1	3.6053	4.11953	23.942	43.3156	18.7456	3.86241	33.6288	8.70668	3.12212	0.0409364	0.240714	hypothetical protein ZWY2020_003596	573	20	9.48E-60	86.14	-	-	-	-	-	-	-	-	-	-
HORVU.MOREX.r3.4HG0393760.1	2.40353	0	14.3652	40.107	14.2189	1.20177	27.2361	22.6634	4.50229	0.0254009	0.183399	pentatricopeptide repeat-containing protein At4g37170	1887	20	0	93.31	4	F:GO:0003723; F:GO:0008270; P:GO:0009451; C:GO:0043231	F:RNA binding; F:zinc ion binding; P:RNA modification; C:intracellular membrane-bounded organelle	-	-	-	-	-	-	-
HORVU.MOREX.r3.4HG0347350.1	7.81147	17.508	324.654	532.621	220.649	12.6597	428.637	33.8583	5.08144	1.14E-08	1.62E-06	putative transposase	1029	20	0	83.64	1	F:GO:0003676	F:nucleic acid binding	-	-	-	-	-	-	-
HORVU.MOREX.r3.5HG0430760.1	2.40353	4.11953	34.4765	46.5241	21.8809	3.26153	40.5003	12.4176	3.63431	0.00992336	0.0995086	L-type lectin-domain containing receptor kinase IX.1-like	1992	20	0	86.85	5	F:GO:0004674; F:GO:0005524; P:GO:0006468; C:GO:0016021; F:GO:0030247	F:protein serine/threonine kinase activity; F:ATP binding; P:protein phosphorylation; C:integral component of membrane; F:polysaccharide binding	EC:2.7.1; EC:2.7; EC:2	Transferring phosphorus-containing groups; Transferring phosphorus-containing groups; Transferases	-	-	-	-	-
HORVU.MOREX.r3.2HG0111260.1	0	2.05977	14.3652	30.4813	11.7266	1.02988	22.4233	21.7726	4.44444	0.0200334	0.158415	retrotransposon protein, putative, unclassified	756	20	3.83E-131	81.25	4	F:GO:0003676; F:GO:0004523; F:GO:0008270; P:GO:0090502	F:nucleic acid binding; F:RNA-DNA hybrid ribonuclease activity; F:zinc ion binding; P:RNA phosphodiester bond hydrolysis, endonucleolytic	EC:3.1.30; EC:3.1; EC:3; EC:3.1.26; EC:3.1.26.4	Acting on ester bonds; Acting on ester bonds; Hydrolases; Acting on ester bonds; Ribonuclease H	-	-	-	-	-
HORVU.MOREX.r3.1HG0015470.1	8.41236	5.14942	60.3339	25.6685	24.891	6.78089	43.0012	6.34153	2.66483	0.0285667	0.195683	jasmonate-induced oxygenase 1-like	1080	20	0	90.12	2	F:GO:0046872; F:GO:0051213	F:metal ion binding; F:dioxygenase activity	EC:1	Oxidoreductases	-	-	-	-	-
HORVU.MOREX.r3.3HG0248230.1	0	0	1.91536	24.0642	6.49489	0	12.9898	Inf	Inf	0.0360748	0.223466	hypothetical protein ZWY2020_033309	822	20	1.34E-180	69.53	-	-	-	-	-	-	-	-	-	-
HORVU.MOREX.r3.6HG0567160.1	828.016	773.443	134.075	77.0054	453.135	800.729	105.54	0.131805	-2.92352	0.000446314	0.00956443	tubulin beta-3 chain	1341	20	0	99.52	7	P:GO:0000226; P:GO:0000278; F:GO:0003924; F:GO:0005200; F:GO:0005525; C:GO:0005737; C:GO:0005874	P:microtubule cytoskeleton organization; P:mitotic cell cycle; F:GTPase activity; F:structural constituent of cytoskeleton; F:GTP binding; C:cytoplasm; C:microtubule	EC:3.6.1; EC:3.6; EC:3; EC:3.6.1.15	Acting on acid anhydrides; Acting on acid anhydrides; Hydrolases; Nucleoside-triphosphate phosphatase	-	-	-	K07375	Pathogenic Escherichia coli infection; Salmonella infection;
HORVU.MOREX.r3.2HG0183060.1	0	0	9.57681	16.0428	6.4049	0	12.8098	Inf	Inf	0.0270218	0.189845	hypothetical protein ZWY2020_055476	846	20	1.40E-149	80.97	1	F:GO:0003677	F:DNA binding	-	-	-	-	-	-	-
HORVU.MOREX.r3.5HG0527870.1	3.6053	0	13.4075	46.5241	15.8842	1.80265	29.9658	16.6232	4.05513	0.0346432	0.218381	L-type lectin-domain containing receptor kinase IX.2-like	1974	20	0	72.83	5	F:GO:0004674; F:GO:0005524; P:GO:0006468; C:GO:0016021; P:GO:0098542	F:protein serine/threonine kinase activity; F:ATP binding; P:protein phosphorylation; C:integral component of membrane; P:defense response to other organism	EC:2.7.1; EC:2.7; EC:2	Transferring phosphorus-containing groups; Transferring phosphorus-containing groups; Transferases	-	-	-	-	-
HORVU.MOREX.r3.1HG0035650.1	0	0	13.4075	20.8556	8.56579	0	17.1316	Inf	Inf	0.0103681	0.102683	putative calcium-binding protein CML16	708	20	7.14E-147	95.44	-	-	-	-	-	-	-	-	-	-
HORVU.MOREX.r3.1HG0074500.1	149.019	208.036	19.1536	9.62568	96.4587	178.528	14.3897	0.0806018	-3.63304	0.000103154	0.00297687	Histone H3.2	411	20	2.95E-92	100	4	C:GO:0000786; F:GO:0003677; C:GO:0005634; F:GO:0046982	C:nucleosome; F:DNA binding; C:nucleus; F:protein heterodimerization activity	-	-	-	-	-	K11253	-
HORVU.MOREX.r3.3HG0307380.1	9.61412	5.14942	46.9264	91.4439	38.2835	7.38177	69.1852	9.37244	3.22842	0.00740865	0.0809304	Cohesin subunit SA-1	474	20	2.40E-90	80.66	2	F:GO:0003677; C:GO:0005634	F:DNA binding; C:nucleus	-	-	-	-	-	-	-
HORVU.MOREX.r3.3HG0252310.1	2.40353	0	70.8684	68.984	35.564	1.20177	69.9262	58.1863	5.86261	3.15E-05	0.00110784	heavy metal-associated isoprenylated plant protein 43-like	402	20	7.36E-54	92.68	1	F:GO:0046872	F:metal ion binding	-	-	-	-	-	-	-
HORVU.MOREX.r3.7HG0706080.1	1.20177	5.14942	30.6458	43.3156	20.0781	3.17559	36.9807	11.6453	3.54167	0.0123418	0.116017	Alternative oxidase 1a, mitochondrial	1734	20	0	88.21	-	-	-	-	-	-	-	-	-	-
HORVU.MOREX.r3.5HG0520690.1	0	0	13.4075	11.23	6.15937	0	12.3187	Inf	Inf	0.0255599	0.184044	uncharacterized protein LOC123113779	1164	20	6.93E-168	58.44	-	-	-	-	-	-	-	-	-	-
HORVU.MOREX.r3.7HG0735030.1	1.20177	2.05977	51.7148	52.9412	26.9794	1.63077	52.328	32.088	5.00396	0.000364339	0.00807503	predicted protein	384	20	2.94E-81	91.13	-	-	-	-	-	-	-	-	-	-
HORVU.MOREX.r3.7HG0636230.1	0	0	12.4499	9.62568	5.51888	0	11.0378	Inf	Inf	0.0338699	0.215054	hypothetical protein ZWY2020_047528	366	7	3.70E-81	63.75	-	-	-	-	-	-	-	-	-	-
HORVU.MOREX.r3.1HG0031470.1	0	0	17.2383	16.0428	8.32027	0	16.6405	Inf	Inf	0.00991043	0.0994619	RING-H2 finger protein ATL39-like	723	20	7.86E-133	77.41	6	F:GO:0003824; C:GO:0005794; P:GO:0007034; C:GO:0016021; P:GO:0019538; P:GO:0044260	F:catalytic activity; C:Golgi apparatus; P:vacuolar transport; C:integral component of membrane; P:protein metabolic process; P:cellular macromolecule metabolic process	-	-	-	-	-	-	-
HORVU.MOREX.r3.4HG0376970.1	3.6053	2.05977	82.3606	171.658	64.9209	2.83253	127.009	44.8395	5.4867	1.46E-06	8.88E-05	unnamed protein product	384	20	2.19E-41	88.57	1	C:GO:0016021	C:integral component of membrane	-	-	-	-	-	-	-
HORVU.MOREX.r3.1HG0087320.1	0	0	7.66145	19.2514	6.7282	0	13.4564	Inf	Inf	0.0257243	0.184599	U3 small nucleolar RNA-associated protein 25-like	645	8	4.31E-30	70.76	1	C:GO:0005783	C:endoplasmic reticulum	-	-	-	-	-	-	-
HORVU.MOREX.r3.6HG0628050.1	751.704	712.679	186.748	178.075	457.302	732.192	182.411	0.249131	-2.00503	0.010626	0.104384	DNA (cytosine-5)-methyltransferase 1-like isoform X2	2706	20	0	96.06	5	F:GO:0003677; F:GO:0003682; F:GO:0003886; C:GO:0005634; P:GO:0090116	F:DNA binding; F:chromatin binding; F:DNA (cytosine-5-)-methyltransferase activity; C:nucleus; P:C-5 methylation of cytosine	EC:2.1; EC:2.1.1.37; EC:2; EC:2.1.1	Transferring one-carbon groups; DNA (cytosine-5-)-methyltransferase; Transferases; Transferring one-carbon groups	-	-	-	K00558	Metabolic pathways; Cysteine and methionine metabolism;
HORVU.MOREX.r3.2HG0202620.1	42.6627	60.7631	1.91536	6.41712	27.9396	51.7129	4.16624	0.0805648	-3.63371	0.00409911	0.0531953	peroxidase 50-like	987	20	0	97.11	7	F:GO:0004601; C:GO:0005576; P:GO:0006979; F:GO:0020037; P:GO:0042744; F:GO:0046872; P:GO:0098869	F:peroxidase activity; C:extracellular region; P:response to oxidative stress; F:heme binding; P:hydrogen peroxide catabolic process; F:metal ion binding; P:cellular oxidant detoxification	EC:1.11; EC:1; EC:1.11.1	Acting on a peroxide as acceptor; Oxidoreductases; Acting on a peroxide as acceptor	-	-	-	K00430	Metabolic pathways; Biosynthesis of secondary metabolites; Phenylpropanoid biosynthesis;
HORVU.MOREX.r3.3HG0229840.1	0.600883	3.08965	21.069	25.6685	12.607	1.84527	23.3687	12.6641	3.66268	0.0327558	0.211577	putative disease resistance protein RGA3	2097	20	0	87.1	2	P:GO:0006952; F:GO:0043531	P:defense response; F:ADP binding	-	-	-	-	-	-	-
HORVU.MOREX.r3.6HG0598320.1	0	0	13.4075	11.23	6.15937	0	12.3187	Inf	Inf	0.0255599	0.184044	unnamed protein product	408	20	1.63E-41	76.99	1	C:GO:0016021	C:integral component of membrane	-	-	-	-	-	-	-
HORVU.MOREX.r3.5HG0458840.1	0	2.05977	11.4922	27.2728	10.2062	1.02988	19.3825	18.8201	4.2342	0.0343272	0.217299	NAC domain-containing protein 90-like	693	20	1.08E-154	81.52	3	F:GO:0003677; C:GO:0005634; P:GO:0006355	F:DNA binding; C:nucleus; P:regulation of DNA-templated transcription	-	-	-	-	-	-	-
HORVU.MOREX.r3.7HG0650970.1	150.221	181.26	13.4075	12.8342	89.4305	165.74	13.1209	0.0791655	-3.65899	7.29E-05	0.00223479	Histone H3.2	411	20	2.28E-92	100	4	C:GO:0000786; F:GO:0003677; C:GO:0005634; F:GO:0046982	C:nucleosome; F:DNA binding; C:nucleus; F:protein heterodimerization activity	-	-	-	-	-	K11253	-
HORVU.MOREX.r3.1HG0085590.1	21.0309	29.8666	134.075	96.2568	70.3074	25.4488	115.166	4.52541	2.17805	0.00952045	0.0968693	non-specific phospholipase C4-like	1662	20	0	93.18	2	P:GO:0009395; F:GO:0016788	P:phospholipid catabolic process; F:hydrolase activity, acting on ester bonds	EC:3.1; EC:3	Acting on ester bonds; Hydrolases	-	-	-	K01114	Metabolic pathways; Biosynthesis of secondary metabolites; Glycerophospholipid metabolism; Quorum sensing;
HORVU.MOREX.r3.6HG0560150.1	6.60971	0	36.3919	35.2942	19.5739	3.30485	35.843	10.8456	3.43903	0.0297043	0.20015	probable LRR receptor-like serine/threonine-protein kinase At1g05700 isoform X1	2352	20	0	95.52	4	F:GO:0004672; F:GO:0005524; P:GO:0006468; C:GO:0016021	F:protein kinase activity; F:ATP binding; P:protein phosphorylation; C:integral component of membrane	EC:2.7.1; EC:2.7; EC:2	Transferring phosphorus-containing groups; Transferring phosphorus-containing groups; Transferases	-	-	-	-	-
HORVU.MOREX.r3.6HG0564650.1	4.20618	2.05977	67.9954	83.4225	39.421	3.13297	75.709	24.1652	4.59486	0.000197197	0.00499242	hypothetical protein ZWY2020_000181	663	20	7.98E-75	83.16	-	-	-	-	-	-	-	-	-	-
HORVU.MOREX.r3.4HG0394870.1	4.80706	6.1793	43.0957	59.3583	28.3601	5.49318	51.227	9.32556	3.22119	0.0101533	0.10132	formin-like protein 20	2715	20	0	81.38	2	F:GO:0004721; P:GO:0006470	F:phosphoprotein phosphatase activity; P:protein dephosphorylation	EC:3.1; EC:3; EC:3.1.3	Acting on ester bonds; Hydrolases; Acting on ester bonds	-	-	-	-	-
HORVU.MOREX.r3.5HG0491110.1	0	0	23.942	14.4385	9.59514	0	19.1903	Inf	Inf	0.00499566	0.0614152	predicted protein	507	20	1.47E-84	93.72	-	-	-	-	-	-	-	-	-	-
HORVU.MOREX.r3.2HG0139210.1	12.0177	6.1793	62.2493	60.9626	35.3522	9.09848	61.606	6.77102	2.75937	0.0169158	0.142967	protein FAR1-RELATED SEQUENCE 5-like	1644	20	0	76.37	1	F:GO:0046872	F:metal ion binding	-	-	-	-	-	-	-
HORVU.MOREX.r3.4HG0407820.1	1.80265	3.08965	55.5455	75.4011	33.9597	2.44615	65.4733	26.7659	4.74232	0.000201441	0.0050759	zinc finger MYM-type protein 1 isoform X1	459	20	2.00E-98	90.34	1	F:GO:0046983	F:protein dimerization activity	-	-	-	-	-	-	-
HORVU.MOREX.r3.2HG0206640.1	1.20177	0	7.66145	32.0856	10.2372	0.600883	19.8735	33.0739	5.04762	0.0371201	0.226984	pheromone receptor transcription activator-like	1176	20	0	71.77	1	F:GO:0005488	F:binding	-	-	-	-	-	-	-
HORVU.MOREX.r3.3HG0275220.1	2.40353	2.05977	28.7304	22.4599	13.9134	2.23165	25.5952	11.4692	3.51969	0.0364511	0.225091	homeobox-leucine zipper protein HOX3-like	669	20	5.63E-104	88.94	4	F:GO:0000981; C:GO:0005634; P:GO:0006357; F:GO:0043565	F:DNA-binding transcription factor activity, RNA polymerase II-specific; C:nucleus; P:regulation of transcription by RNA polymerase II; F:sequence-specific DNA binding	-	-	-	-	-	-	-
HORVU.MOREX.r3.1HG0058400.1	0	0	25.8574	25.6685	12.8815	0	25.7629	Inf	Inf	0.00149675	0.0249203	D-3-phosphoglycerate dehydrogenase, chloroplastic	447	20	1.09E-90	92.13	-	-	-	-	-	-	-	-	-	-
HORVU.MOREX.r3.6HG0539600.1	5.40794	6.1793	45.011	96.2568	38.2138	5.79362	70.6339	12.1917	3.60782	0.00242423	0.0361612	UDP-glycosyltransferase 73C6	636	20	3.64E-41	93.43	-	-	-	-	-	-	-	-	-	-
HORVU.MOREX.r3.6HG0627830.1	2.40353	0	36.3919	41.7113	20.1267	1.20177	39.0516	32.4952	5.02215	0.00305651	0.0431254	NAC domain-containing protein 92-like	933	20	0	91.95	3	F:GO:0003677; C:GO:0005634; P:GO:0006355	F:DNA binding; C:nucleus; P:regulation of DNA-templated transcription	-	-	-	-	-	-	-
HORVU.MOREX.r3.4HG0407500.1	4.80706	3.08965	24.8997	51.3369	21.0333	3.94836	38.1183	9.65423	3.27116	0.0308303	0.204185	potassium transporter 1-like	2313	20	0	94.74	3	F:GO:0015079; C:GO:0016021; P:GO:0071805	F:potassium ion transmembrane transporter activity; C:integral component of membrane; P:potassium ion transmembrane transport	EC:7	n/a	-	-	-	-	-
HORVU.MOREX.r3.1HG0019690.1	19.2282	13.3885	1005.57	1674.87	678.263	16.3084	1340.22	82.1797	6.36071	2.26E-10	7.44E-08	transposase family protein	651	20	1.84E-144	87.31	3	F:GO:0003676; P:GO:0015074; F:GO:0016740	F:nucleic acid binding; P:DNA integration; F:transferase activity	EC:2	Transferases	-	-	-	-	-
HORVU.MOREX.r3.3HG0267990.1	264.388	293.517	16562.1	25604.3	10681.1	278.953	21083.2	75.58	6.23993	0.000113901	0.0032296	DDE-type integrase/transposase/recombinase	327	20	5.95E-56	87.55	2	F:GO:0003676; P:GO:0015074	F:nucleic acid binding; P:DNA integration	-	-	-	-	-	-	-
HORVU.MOREX.r3.3HG0324340.1	1.20177	2.05977	17.2383	25.6685	11.5421	1.63077	21.4534	13.1554	3.71758	0.0467383	0.258895	Inositol transporter 4	387	20	9.15E-64	96.38	-	-	-	-	-	-	-	-	-	-
HORVU.MOREX.r3.2HG0215000.1	0	0	5.74609	16.0428	5.44722	0	10.8944	Inf	Inf	0.0462273	0.256784	cysteine proteinase inhibitor 8-like	387	20	4.95E-89	92.73	3	F:GO:0004869; P:GO:0006952; P:GO:0010951	F:cysteine-type endopeptidase inhibitor activity; P:defense response; P:negative regulation of endopeptidase activity	-	-	-	-	-	-	-
HORVU.MOREX.r3.2HG0196190.1	0	0	17.2383	33.6899	12.732	0	25.4641	Inf	Inf	0.00205205	0.0318759	hypothetical protein D1007_05805	534	20	4.41E-123	95.71	-	-	-	-	-	-	-	-	-	-
HORVU.MOREX.r3.7HG0727200.1	3.6053	0	83.3183	129.947	54.2176	1.80265	106.632	59.1532	5.88639	2.50E-06	0.000137278	putative methionyl-tRNA synthetase	714	20	3.94E-122	95.63	-	-	-	-	-	-	-	-	-	-
HORVU.MOREX.r3.1HG0066680.1	18.0265	9.26895	82.3606	77.0054	46.6654	13.6477	79.683	5.83856	2.54561	0.015008	0.132521	Bowman-Birk type proteinase inhibitor B5-like	270	20	2.44E-48	95.13	3	F:GO:0004867; C:GO:0005576; P:GO:0010951	F:serine-type endopeptidase inhibitor activity; C:extracellular region; P:negative regulation of endopeptidase activity	-	-	-	-	-	-	-
HORVU.MOREX.r3.6HG0539560.1	59.4874	72.0919	225.055	316.043	168.169	65.7896	270.549	4.11234	2.03996	0.0110733	0.107707	predicted protein	1353	20	4.40E-161	74.99	2	F:GO:0008270; C:GO:0016021	F:zinc ion binding; C:integral component of membrane	-	-	-	-	-	-	-
HORVU.MOREX.r3.7HG0657190.1	2.40353	2.05977	62.2493	43.3156	27.507	2.23165	52.7824	23.6518	4.56388	0.000688653	0.0135016	serine/threonine-protein phosphatase 7 long form homolog isoform X1	1188	20	0	89.42	-	-	-	-	-	-	-	-	-	-
HORVU.MOREX.r3.6HG0553440.1	0	0	3.83073	25.6685	7.3748	0	14.7496	Inf	Inf	0.0234085	0.173965	predicted protein	540	20	2.23E-120	65.93	3	F:GO:0003676; F:GO:0008408; P:GO:0090305	F:nucleic acid binding; F:3'-5' exonuclease activity; P:nucleic acid phosphodiester bond hydrolysis	EC:3.1; EC:3	Acting on ester bonds; Hydrolases	-	-	-	-	-
HORVU.MOREX.r3.2HG0199150.1	21.6318	20.5977	70.8684	142.781	63.9697	21.1147	106.825	5.05925	2.33892	0.0182591	0.149168	putative disease resistance RPP13-like protein 2	2724	20	0	87.9	2	P:GO:0006952; F:GO:0043531	P:defense response; F:ADP binding	-	-	-	-	-	-	-
HORVU.MOREX.r3.4HG0358880.2	329.885	301.756	71.8261	43.3156	186.696	315.82	57.5708	0.18229	-2.45569	0.00264408	0.0386574	ATP-citrate synthase alpha chain protein 2	1269	20	0	97.77	5	F:GO:0003878; F:GO:0005524; C:GO:0005829; P:GO:0006629; F:GO:0016829	F:ATP citrate synthase activity; F:ATP binding; C:cytosol; P:lipid metabolic process; F:lyase activity	EC:2.3.3; EC:2.3; EC:2; EC:4; EC:2.3.3.8	Acyltransferases; Acyltransferases; Transferases; Lyases; ATP citrate synthase	-	-	-	K01648	Metabolic pathways; Biosynthesis of secondary metabolites; Microbial metabolism in diverse environments; Citrate cycle (TCA cycle); Carbon fixation pathways in prokaryotes;
HORVU.MOREX.r3.4HG0358880.1	222.927	200.827	65.1223	36.8984	131.444	211.877	51.0104	0.240754	-2.05437	0.0142005	0.127677	ATP-citrate synthase alpha chain protein 2	1089	20	0	98.34	5	F:GO:0003878; F:GO:0005524; C:GO:0005829; P:GO:0006629; F:GO:0016829	F:ATP citrate synthase activity; F:ATP binding; C:cytosol; P:lipid metabolic process; F:lyase activity	EC:2.3.3; EC:2.3; EC:2; EC:4; EC:2.3.3.8	Acyltransferases; Acyltransferases; Transferases; Lyases; ATP citrate synthase	-	-	-	-	-
HORVU.MOREX.r3.5HG0519390.1	16.8247	10.2988	65.1223	70.5883	40.7085	13.5618	67.8553	5.00343	2.32292	0.0334013	0.213856	hAT dimerisation domain-containing protein -like	1344	20	0	77.64	1	F:GO:0005488	F:binding	-	-	-	-	-	-	-
HORVU.MOREX.r3.2HG0104030.1	2.40353	2.05977	61.2916	174.866	60.1553	2.23165	118.079	52.9111	5.7255	1.42E-06	8.68E-05	zinc finger MYM-type protein 1-like	933	20	0	92.05	1	F:GO:0046983	F:protein dimerization activity	-	-	-	-	-	-	-
HORVU.MOREX.r3.7HG0666430.1	0	0	22.0267	25.6685	11.9238	0	23.8476	Inf	Inf	0.00232849	0.0350534	hypothetical protein ZWY2020_032988, partial	774	20	3.65E-155	94.86	-	-	-	-	-	-	-	-	-	-
HORVU.MOREX.r3.2HG0122440.1	3.6053	2.05977	47.8841	102.674	39.0558	2.83253	75.279	26.5766	4.73208	0.000215887	0.00535782	pentatricopeptide repeat-containing protein At1g26900, mitochondrial	1692	20	0	87.75	-	-	-	-	-	-	-	-	-	-
HORVU.MOREX.r3.4HG0382860.1	16.2238	15.4483	94.8104	142.781	67.3159	15.836	118.796	7.5016	2.9072	0.00251586	0.0372028	retrotransposon protein, putative, Ty1-copia subclass	243	20	3.62E-45	93.63	5	F:GO:0003676; F:GO:0003964; P:GO:0006278; F:GO:0008270; P:GO:0015074	F:nucleic acid binding; F:RNA-directed DNA polymerase activity; P:RNA-templated DNA biosynthetic process; F:zinc ion binding; P:DNA integration	EC:2.7; EC:2; EC:2.7.7.49; EC:2.7.7	Transferring phosphorus-containing groups; Transferases; RNA-directed DNA polymerase; Transferring phosphorus-containing groups	-	-	-	-	-
HORVU.MOREX.r3.1HG0066520.1	116.571	92.6895	24.8997	25.6685	64.9572	104.63	25.2841	0.241652	-2.049	0.0223447	0.169276	probable magnesium transporter NIPA4	1146	20	0	95.7	5	C:GO:0005769; C:GO:0005886; F:GO:0015095; C:GO:0016021; P:GO:1903830	C:early endosome; C:plasma membrane; F:magnesium ion transmembrane transporter activity; C:integral component of membrane; P:magnesium ion transmembrane transport	EC:7	n/a	-	-	-	-	-
HORVU.MOREX.r3.1HG0065830.1	1.20177	1.02988	33.5188	32.0856	16.959	1.11582	32.8022	29.3973	4.87761	0.00471904	0.0589998	pentatricopeptide repeat-containing protein At4g14050, mitochondrial	1833	20	0	92.34	3	F:GO:0008270; C:GO:0016021; P:GO:0016554	F:zinc ion binding; C:integral component of membrane; P:cytidine to uridine editing	-	-	-	-	-	-	-
HORVU.MOREX.r3.2HG0106500.1	0	0	7.66145	17.6471	6.32713	0	12.6543	Inf	Inf	0.0301232	0.201313	F-box/FBD/LRR-repeat protein At1g13570-like	1554	20	0	86.87	-	-	-	-	-	-	-	-	-	-
HORVU.MOREX.r3.6HG0540540.1	8.41236	5.14942	87.149	109.091	52.4504	6.78089	98.12	14.4701	3.855	0.000349052	0.00780534	bidirectional sugar transporter SWEET14-like	885	20	0	93.62	3	C:GO:0005886; P:GO:0008643; C:GO:0016021	C:plasma membrane; P:carbohydrate transport; C:integral component of membrane	-	-	-	-	-	-	-
HORVU.MOREX.r3.5HG0507880.1	1.20177	2.05977	52.6725	93.0482	37.2456	1.63077	72.8603	44.6786	5.48151	3.38E-05	0.00118219	E3 ubiquitin-protein ligase EL5-like	477	20	6.29E-25	85.4	3	C:GO:0016021; P:GO:0044238; P:GO:0044260	C:integral component of membrane; P:primary metabolic process; P:cellular macromolecule metabolic process	-	-	-	-	-	-	-
HORVU.MOREX.r3.5HG0444850.1	6.00883	4.11953	34.4765	51.3369	23.9855	5.06418	42.9067	8.47259	3.0828	0.025771	0.184821	Leucine-rich repeat (LRR) family protein	2244	20	0	90.55	-	-	-	-	-	-	-	-	-	-
HORVU.MOREX.r3.6HG0614490.1	10.8159	10.2988	90.022	129.947	60.2709	10.5574	109.984	10.4178	3.38098	0.000771676	0.0147443	type I inositol polyphosphate 5-phosphatase 5-like	1830	20	0	89.05	7	P:GO:0000413; F:GO:0003755; F:GO:0004439; F:GO:0004445; F:GO:0034485; P:GO:0046855; P:GO:0046856	P:protein peptidyl-prolyl isomerization; F:peptidyl-prolyl cis-trans isomerase activity; F:phosphatidylinositol-4,5-bisphosphate 5-phosphatase activity; F:inositol-polyphosphate 5-phosphatase activity; F:phosphatidylinositol-3,4,5-trisphosphate 5-phosphatase activity; P:inositol phosphate dephosphorylation; P:phosphatidylinositol dephosphorylation	EC:5.2.1.8; EC:3.1; EC:3.1.3.36; EC:5.2; EC:3.1.3.56; EC:3; EC:5; EC:3.1.3	Peptidylprolyl isomerase; Acting on ester bonds; Phosphoinositide 5-phosphatase; Cis-trans-isomerases; Inositol-polyphosphate 5-phosphatase; Hydrolases; Isomerases; Acting on ester bonds	-	-	-	-	-
HORVU.MOREX.r3.2HG0215980.1	2.40353	2.05977	22.9844	27.2728	13.6801	2.23165	25.1286	11.2601	3.49315	0.0447921	0.252662	predicted protein	627	20	1.34E-117	88.4	2	P:GO:0007166; C:GO:0016021	P:cell surface receptor signaling pathway; C:integral component of membrane	-	-	-	-	-	-	-
HORVU.MOREX.r3.1HG0077980.1	3.6053	0	23.942	70.5883	24.5339	1.80265	47.2652	26.2199	4.71259	0.00333132	0.0456976	senescence-induced receptor-like serine/threonine-protein kinase	2844	20	0	79.71	4	F:GO:0004674; F:GO:0005524; P:GO:0006468; C:GO:0016021	F:protein serine/threonine kinase activity; F:ATP binding; P:protein phosphorylation; C:integral component of membrane	EC:2.7.1; EC:2.7; EC:2	Transferring phosphorus-containing groups; Transferring phosphorus-containing groups; Transferases	-	-	-	-	-
HORVU.MOREX.r3.1HG0000400.1	0	0	14.3652	9.62568	5.99772	0	11.9954	Inf	Inf	0.0262082	0.186963	putative LRR receptor-like serine/threonine-protein kinase	339	20	3.05E-59	96.88	-	-	-	-	-	-	-	-	-	-
HORVU.MOREX.r3.3HG0280680.1	31.8468	23.6873	1.91536	3.20856	15.1645	27.767	2.56196	0.0922662	-3.43805	0.0357124	0.222248	Histone H3.2	411	20	2.28E-92	100	4	C:GO:0000786; F:GO:0003677; C:GO:0005634; F:GO:0046982	C:nucleosome; F:DNA binding; C:nucleus; F:protein heterodimerization activity	-	-	-	-	-	K11253	-
HORVU.MOREX.r3.6HG0555330.1	0	0	12.4499	19.2514	7.9253	0	15.8506	Inf	Inf	0.0135815	0.124007	BURP domain-containing protein 4-like	1125	20	0	82.73	-	-	-	-	-	-	-	-	-	-
HORVU.MOREX.r3.2HG0132830.1	14.4212	23.6873	52.6725	110.695	50.3691	19.0543	81.6839	4.28691	2.09994	0.03933	0.234904	ubiquitin thioesterase OTUB2-like	1215	20	0	76.86	4	F:GO:0004843; C:GO:0005634; F:GO:0043130; P:GO:0071108	F:cysteine-type deubiquitinase activity; C:nucleus; F:ubiquitin binding; P:protein K48-linked deubiquitination	EC:3.4; EC:3; EC:3.4.19.12	Acting on peptide bonds (peptidases); Hydrolases; Ubiquitinyl hydrolase 1	-	-	-	-	-
HORVU.MOREX.r3.7HG0720070.1	81.1191	102.988	18.1959	25.6685	56.993	92.0538	21.9322	0.238254	-2.06943	0.0261648	0.186963	predicted protein	867	20	1.11E-135	93.16	-	-	-	-	-	-	-	-	-	-
HORVU.MOREX.r3.6HG0619010.1	4.20618	8.23907	33.5188	59.3583	26.3306	6.22262	46.4386	7.46286	2.89973	0.0222674	0.168895	auxin-responsive protein SAUR32-like	363	20	9.46E-63	93.01	1	P:GO:0009733	P:response to auxin	-	-	-	-	-	K14488	Plant hormone signal transduction;
HORVU.MOREX.r3.4HG0350900.1	770.331	658.096	138.864	142.781	427.518	714.214	140.822	0.197171	-2.34248	0.00274845	0.0398728	UDP-glucose 6-dehydrogenase 4-like	1443	20	0	97.72	6	F:GO:0003979; C:GO:0005634; C:GO:0005829; P:GO:0006024; P:GO:0006065; F:GO:0051287	F:UDP-glucose 6-dehydrogenase activity; C:nucleus; C:cytosol; P:glycosaminoglycan biosynthetic process; P:UDP-glucuronate biosynthetic process; F:NAD binding	EC:1.1.1.22; EC:1.1; EC:1; EC:1.1.1	UDP-glucose 6-dehydrogenase; Acting on the CH-OH group of donors; Oxidoreductases; Acting on the CH-OH group of donors	-	-	-	K00012	Metabolic pathways; Biosynthesis of nucleotide sugars; Biosynthesis of cofactors; Pentose and glucuronate interconversions; Ascorbate and aldarate metabolism; Amino sugar and nucleotide sugar metabolism; O-Antigen nucleotide sugar biosynthesis;
HORVU.MOREX.r3.1HG0015430.1	120.777	109.168	629.197	806.953	416.524	114.973	718.075	6.24562	2.64284	0.00129558	0.0222926	trihelix transcription factor GT-3b-like	1404	20	6.02E-107	78.92	4	F:GO:0003700; C:GO:0005634; P:GO:0006355; F:GO:0043565	F:DNA-binding transcription factor activity; C:nucleus; P:regulation of DNA-templated transcription; F:sequence-specific DNA binding	-	-	-	-	-	-	-
HORVU.MOREX.r3.7HG0737030.1	0	0	11.4922	12.8342	6.0816	0	12.1632	Inf	Inf	0.0283886	0.194901	BTB/POZ and MATH domain-containing protein 1-like isoform X1	1029	20	0	96.06	2	P:GO:0009628; P:GO:0016567	P:response to abiotic stimulus; P:protein ubiquitination	-	-	-	-	-	K10523	-
HORVU.MOREX.r3.6HG0631950.1	0	0	8.61913	33.6899	10.5773	0	21.1545	Inf	Inf	0.00584604	0.0686119	F-box/FBD/LRR-repeat protein At3g52680-like	1257	20	0	89.34	-	-	-	-	-	-	-	-	-	-
HORVU.MOREX.r3.2HG0178760.1	0	0	17.2383	8.0214	6.31492	0	12.6298	Inf	Inf	0.0208505	0.162313	Coatomer subunit gamma-2	459	20	5.24E-91	85.62	-	-	-	-	-	-	-	-	-	-
HORVU.MOREX.r3.5HG0449570.1	1.20177	2.05977	18.1959	27.2728	12.1826	1.63077	22.7343	13.9409	3.80125	0.0388111	0.232848	Cytokinin-O-glucosyltransferase 2	1455	20	0	85.76	-	-	-	-	-	-	-	-	-	-
HORVU.MOREX.r3.6HG0544190.1	0	0	19.1536	27.2728	11.6066	0	23.2132	Inf	Inf	0.00284393	0.0409729	retrotransposon protein, putative, unclassified	744	20	1.35E-130	79.03	1	F:GO:0005488	F:binding	-	-	-	-	-	-	-
HORVU.MOREX.r3.5HG0425420.2	91.935	108.138	18.1959	28.877	61.7864	100.036	23.5365	0.235279	-2.08755	0.0200049	0.158223	trifunctional UDP-glucose 4,6-dehydratase/UDP-4-keto-6-deoxy-D-glucose 3,5-epimerase/UDP-4-keto-L-rhamnose-reductase RHM1-like	2004	20	0	98.08	3	F:GO:0008460; P:GO:0009225; F:GO:0102965	F:dTDP-glucose 4,6-dehydratase activity; P:nucleotide-sugar metabolic process; F:alcohol-forming fatty acyl-CoA reductase activity	EC:1.2; EC:4.2.1; EC:1; EC:4.2; EC:4; EC:1.2.1.84; EC:4.2.1.46; EC:1.2.1	Acting on the aldehyde or oxo group of donors; Carbon-oxygen lyases; Oxidoreductases; Carbon-oxygen lyases; Lyases; Alcohol-forming fatty acyl-CoA reductase; dTDP-glucose 4,6-dehydratase; Acting on the aldehyde or oxo group of donors	-	-	-	K12450	Metabolic pathways; Biosynthesis of nucleotide sugars; Amino sugar and nucleotide sugar metabolism;
HORVU.MOREX.r3.5HG0425420.1	70.9041	85.4803	21.069	16.0428	48.3741	78.1922	18.5559	0.237311	-2.07515	0.043729	0.249363	trifunctional UDP-glucose 4,6-dehydratase/UDP-4-keto-6-deoxy-D-glucose 3,5-epimerase/UDP-4-keto-L-rhamnose-reductase RHM1-like	1857	20	0	98.42	3	F:GO:0008460; P:GO:0009225; F:GO:0102965	F:dTDP-glucose 4,6-dehydratase activity; P:nucleotide-sugar metabolic process; F:alcohol-forming fatty acyl-CoA reductase activity	EC:1.2; EC:4.2.1; EC:1; EC:4.2; EC:4; EC:1.2.1.84; EC:4.2.1.46; EC:1.2.1	Acting on the aldehyde or oxo group of donors; Carbon-oxygen lyases; Oxidoreductases; Carbon-oxygen lyases; Lyases; Alcohol-forming fatty acyl-CoA reductase; dTDP-glucose 4,6-dehydratase; Acting on the aldehyde or oxo group of donors	-	-	-	-	-
HORVU.MOREX.r3.6HG0558220.1	0	2.05977	23.942	41.7113	16.9283	1.02988	32.8267	31.8741	4.99431	0.00341189	0.0464802	putative receptor-like protein kinase At3g47110	3156	20	0	86.33	4	F:GO:0004672; F:GO:0005524; P:GO:0006468; C:GO:0016021	F:protein kinase activity; F:ATP binding; P:protein phosphorylation; C:integral component of membrane	EC:2.7.1; EC:2.7; EC:2	Transferring phosphorus-containing groups; Transferring phosphorus-containing groups; Transferases	-	-	-	-	-
HORVU.MOREX.r3.1HG0067000.1	1.80265	2.05977	58.4186	40.107	25.597	1.93121	49.2628	25.5088	4.67292	0.000741989	0.0143376	predicted protein	510	20	6.12E-77	74.89	-	-	-	-	-	-	-	-	-	-
HORVU.MOREX.r3.1HG0090650.1	98.5447	140.064	16.2806	16.0428	67.7331	119.304	16.1617	0.135466	-2.884	0.00236901	0.0355494	histone H4	312	20	4.12E-50	100	7	C:GO:0000786; F:GO:0003677; C:GO:0005634; P:GO:0006334; P:GO:0006352; P:GO:0009414; F:GO:0046982	C:nucleosome; F:DNA binding; C:nucleus; P:nucleosome assembly; P:DNA-templated transcription initiation; P:response to water deprivation; F:protein heterodimerization activity	-	-	-	-	-	K11254	-
HORVU.MOREX.r3.2HG0145010.1	0	2.05977	48.8417	64.1712	28.7682	1.02988	56.5065	54.8668	5.77786	5.74E-05	0.00183385	hypothetical protein ZWY2020_000248	339	20	1.86E-43	84.05	1	C:GO:0016021	C:integral component of membrane	-	-	-	-	-	-	-
HORVU.MOREX.r3.5HG0536420.1	0	2.05977	45.011	41.7113	22.1955	1.02988	43.3611	42.103	5.39585	0.000404348	0.00879562	salicylate/benzoate carboxyl methyltransferase-like	984	20	0	87.22	2	F:GO:0008168; P:GO:0032259	F:methyltransferase activity; P:methylation	EC:2.1; EC:2; EC:2.1.1	Transferring one-carbon groups; Transferases; Transferring one-carbon groups	-	-	-	-	-
HORVU.MOREX.r3.5HG0471820.1	0	2.05977	53.6302	68.984	31.1685	1.02988	61.3071	59.5282	5.8955	2.73E-05	0.000988459	predicted protein	693	20	8.18E-144	86.76	1	P:GO:0032196	P:transposition	-	-	-	-	-	-	-
HORVU.MOREX.r3.3HG0236230.1	0	0	15.3229	11.23	6.63821	0	13.2764	Inf	Inf	0.0197817	0.15715	cyclin-dependent kinase 11A-like	591	20	1.05E-92	93.97	-	-	-	-	-	-	-	-	-	-
HORVU.MOREX.r3.4HG0342930.1	0	0	25.8574	44.9198	17.6943	0	35.3886	Inf	Inf	0.000291329	0.00673519	hypothetical protein CFC21_021060	360	20	3.94E-45	89.7	1	C:GO:0016021	C:integral component of membrane	-	-	-	-	-	-	-
HORVU.MOREX.r3.7HG0742850.1	1.20177	0	13.4075	35.2942	12.4759	0.600883	24.3508	40.5251	5.34075	0.0160114	0.138068	L-type lectin-domain containing receptor kinase IX.1-like	933	20	5.54E-170	81.66	5	F:GO:0004674; F:GO:0005524; P:GO:0006468; C:GO:0016021; F:GO:0030246	F:protein serine/threonine kinase activity; F:ATP binding; P:protein phosphorylation; C:integral component of membrane; F:carbohydrate binding	EC:2.7.1; EC:2.7; EC:2	Transferring phosphorus-containing groups; Transferring phosphorus-containing groups; Transferases	-	-	-	-	-
HORVU.MOREX.r3.7HG0680330.1	1.20177	0	35.4342	70.5883	26.8061	0.600883	53.0113	88.2223	6.46307	0.000132359	0.00366461	vicilin-like seed storage protein At2g18540	555	20	2.86E-66	94.66	-	-	-	-	-	-	-	-	-	-
HORVU.MOREX.r3.1HG0091380.1	3.00441	2.05977	38.3073	64.1712	26.8857	2.53209	51.2392	20.2359	4.33885	0.00207379	0.0320942	predicted protein	615	20	1.25E-141	73.33	3	F:GO:0003676; F:GO:0008408; P:GO:0090305	F:nucleic acid binding; F:3'-5' exonuclease activity; P:nucleic acid phosphodiester bond hydrolysis	EC:3.1; EC:3	Acting on ester bonds; Hydrolases	-	-	-	-	-
HORVU.MOREX.r3.4HG0351800.1	1.20177	0	14.3652	27.2728	10.7099	0.600883	20.819	34.6473	5.11467	0.0258046	0.184927	cation/H(+) antiporter 19-like	462	20	8.86E-62	73.2	4	F:GO:0008270; C:GO:0016020; C:GO:0016021; F:GO:0046872	F:zinc ion binding; C:membrane; C:integral component of membrane; F:metal ion binding	-	-	-	-	-	-	-
HORVU.MOREX.r3.6HG0623060.1	0	0	11.4922	24.0642	8.88909	0	17.7782	Inf	Inf	0.00985765	0.0991974	Superoxide-generating NADPH oxidase heavy chain subunit B	321	20	3.17E-61	79.56	4	F:GO:0003676; F:GO:0004523; C:GO:0016020; P:GO:0090502	F:nucleic acid binding; F:RNA-DNA hybrid ribonuclease activity; C:membrane; P:RNA phosphodiester bond hydrolysis, endonucleolytic	EC:3.1.30; EC:3.1; EC:3; EC:3.1.26; EC:3.1.26.4	Acting on ester bonds; Acting on ester bonds; Hydrolases; Acting on ester bonds; Ribonuclease H	-	-	-	-	-
HORVU.MOREX.r3.2HG0199650.1	1.20177	2.05977	21.069	25.6685	12.4997	1.63077	23.3687	14.3299	3.84096	0.0330028	0.212464	probable metal-nicotianamine transporter YSL6	2205	20	0	95.41	4	C:GO:0005774; C:GO:0016021; P:GO:0035672; F:GO:0035673	C:vacuolar membrane; C:integral component of membrane; P:oligopeptide transmembrane transport; F:oligopeptide transmembrane transporter activity	EC:7	n/a	-	-	-	-	-
HORVU.MOREX.r3.6HG0610770.1	192.282	209.066	43.0957	43.3156	121.94	200.674	43.2056	0.215302	-2.21557	0.00672559	0.0758978	transmembrane 9 superfamily member 12-like	1971	20	0	97.77	4	C:GO:0000139; C:GO:0010008; C:GO:0016021; P:GO:0072657	C:Golgi membrane; C:endosome membrane; C:integral component of membrane; P:protein localization to membrane	-	-	-	-	-	-	-
HORVU.MOREX.r3.6HG0610770.2	208.506	238.933	60.3339	40.107	136.97	223.72	50.2205	0.224479	-2.15534	0.00992568	0.0995086	transmembrane 9 superfamily member 12-like	1971	20	0	97.77	4	C:GO:0000139; C:GO:0010008; C:GO:0016021; P:GO:0072657	C:Golgi membrane; C:endosome membrane; C:integral component of membrane; P:protein localization to membrane	-	-	-	-	-	-	-
HORVU.MOREX.r3.4HG0364870.1	1.20177	2.05977	21.069	24.0642	12.0987	1.63077	22.5666	13.838	3.79057	0.0363829	0.224707	hypothetical protein CFC21_001030	273	16	3.99E-11	59.75	2	F:GO:0016788; P:GO:0090304	F:hydrolase activity, acting on ester bonds; P:nucleic acid metabolic process	EC:3.1; EC:3	Acting on ester bonds; Hydrolases	-	-	-	-	-
HORVU.MOREX.r3.3HG0218720.1	0	0	7.66145	16.0428	5.92606	0	11.8521	Inf	Inf	0.0352772	0.220637	probable transcriptional regulator RABBIT EARS	408	20	8.64E-52	87.67	2	F:GO:0003700; P:GO:0006355	F:DNA-binding transcription factor activity; P:regulation of DNA-templated transcription	-	-	-	-	-	-	-
HORVU.MOREX.r3.5HG0431450.1	0	0	8.61913	30.4813	9.77511	0	19.5502	Inf	Inf	0.00786439	0.0848673	hypothetical protein ZWY2020_018936	357	20	3.62E-33	94.53	-	-	-	-	-	-	-	-	-	-
HORVU.MOREX.r3.6HG0591330.1	0	0	11.4922	11.23	5.68053	0	11.3611	Inf	Inf	0.0331197	0.212742	hypothetical protein ZWY2020_004145	690	20	3.33E-141	96.41	-	-	-	-	-	-	-	-	-	-
HORVU.MOREX.r3.2HG0147830.1	0	0	15.3229	28.877	11.05	0	22.1	Inf	Inf	0.00391657	0.0513076	putative calcium-binding protein CML16	708	20	1.29E-146	93.99	-	-	-	-	-	-	-	-	-	-
HORVU.MOREX.r3.7HG0642010.1	7.21059	4.11953	33.5188	57.7541	25.6508	5.66506	45.6365	8.05577	3.01002	0.0280434	0.193968	hypothetical protein D1007_44804	2388	20	0	75.86	1	C:GO:0016021	C:integral component of membrane	-	-	-	-	-	-	-
HORVU.MOREX.r3.7HG0710280.1	0	0	29.6881	14.4385	11.0317	0	22.0633	Inf	Inf	0.00250749	0.037123	hypothetical protein ZWY2020_031857	591	20	5.54E-87	94.94	-	-	-	-	-	-	-	-	-	-
HORVU.MOREX.r3.3HG0326310.1	5.40794	4.11953	205.901	120.321	83.9375	4.76374	163.111	34.2402	5.09762	2.17E-07	1.86E-05	pathogenesis-related protein 4	441	20	9.89E-86	98.02	7	F:GO:0004540; P:GO:0009626; F:GO:0030246; P:GO:0031640; P:GO:0042742; P:GO:0050832; P:GO:0090501	F:ribonuclease activity; P:plant-type hypersensitive response; F:carbohydrate binding; P:killing of cells of another organism; P:defense response to bacterium; P:defense response to fungus; P:RNA phosphodiester bond hydrolysis	EC:3.1; EC:3	Acting on ester bonds; Hydrolases	-	-	-	-	-
HORVU.MOREX.r3.7HG0747440.2	0	2.05977	28.7304	25.6685	14.1147	1.02988	27.1995	26.4102	4.72302	0.00665361	0.075244	probable O-methyltransferase 2	1110	20	0	96.1	3	F:GO:0008171; P:GO:0032259; F:GO:0046983	F:O-methyltransferase activity; P:methylation; F:protein dimerization activity	EC:2.1; EC:2; EC:2.1.1	Transferring one-carbon groups; Transferases; Transferring one-carbon groups	-	-	-	-	-
HORVU.MOREX.r3.7HG0747440.1	0	6.1793	22.9844	28.877	14.5102	3.08965	25.9307	8.39276	3.06915	0.0401028	0.237786	probable O-methyltransferase 2	1017	20	0	87.89	3	F:GO:0008171; P:GO:0032259; F:GO:0046983	F:O-methyltransferase activity; P:methylation; F:protein dimerization activity	EC:2.1; EC:2; EC:2.1.1	Transferring one-carbon groups; Transferases; Transferring one-carbon groups	-	-	-	-	-
HORVU.MOREX.r3.3HG0236940.1	0.600883	1.02988	45.011	73.7969	30.1097	0.815383	59.4039	72.854	6.18694	4.35E-05	0.00146405	predicted protein	669	20	6.00E-155	92.21	1	P:GO:0032196	P:transposition	-	-	-	-	-	-	-
HORVU.MOREX.r3.3HG0237670.1	147.817	160.662	775.722	712.3	449.125	154.239	744.011	4.82374	2.27015	0.00359057	0.048249	17.5 kDa class II heat shock protein-like	489	20	2.50E-78	96.51	7	P:GO:0006457; P:GO:0009408; P:GO:0009651; P:GO:0042542; F:GO:0043621; F:GO:0051082; P:GO:0051259	P:protein folding; P:response to heat; P:response to salt stress; P:response to hydrogen peroxide; F:protein self-association; F:unfolded protein binding; P:protein complex oligomerization	-	-	-	-	-	K13993	-
HORVU.MOREX.r3.5HG0428090.1	0	0	36.3919	68.984	26.344	0	52.688	Inf	Inf	1.14E-05	0.00048239	predicted protein	693	20	1.12E-143	87.49	1	P:GO:0032196	P:transposition	-	-	-	-	-	-	-
HORVU.MOREX.r3.4HG0413590.1	19.8291	35.016	92.8951	137.968	71.4271	27.4226	115.432	4.20936	2.0736	0.0191427	0.154125	uncharacterized protein LOC123449910 isoform X2	1374	20	0	83.72	-	-	-	-	-	-	-	-	-	-
HORVU.MOREX.r3.7HG0729710.1	1.20177	0	9.57681	36.8984	11.9193	0.600883	23.2376	38.6725	5.27324	0.021239	0.164145	hypothetical protein ZWY2020_027421	207	20	3.77E-35	87.23	-	-	-	-	-	-	-	-	-	-
HORVU.MOREX.r3.5HG0529450.1	5.40794	8.23907	53.6302	147.594	53.7177	6.82351	100.612	14.7449	3.88214	0.000345028	0.00774302	putative disease resistance protein RGA3	4317	20	0	81.66	4	F:GO:0003700; P:GO:0006355; P:GO:0006952; F:GO:0043531	F:DNA-binding transcription factor activity; P:regulation of DNA-templated transcription; P:defense response; F:ADP binding	-	-	-	-	-	-	-
HORVU.MOREX.r3.3HG0315210.1	3.6053	6.1793	34.4765	43.3156	21.8942	4.8923	38.896	7.95046	2.99104	0.0266213	0.188442	F-box protein At5g49610-like	1227	20	0	79.93	-	-	-	-	-	-	-	-	-	-
HORVU.MOREX.r3.7HG0711300.1	2.40353	6.1793	36.3919	57.7541	25.6822	4.29142	47.073	10.9691	3.45537	0.0076564	0.0831289	uncharacterized protein LOC123120197	522	20	1.87E-91	83.72	-	-	-	-	-	-	-	-	-	-
HORVU.MOREX.r3.7HG0650830.1	1.20177	2.05977	22.9844	22.4599	12.1764	1.63077	22.7221	13.9334	3.80048	0.0337611	0.214731	calcium uniporter protein 5, mitochondrial-like	1422	20	0	87.87	6	F:GO:0005262; C:GO:0005743; F:GO:0015292; C:GO:0016021; P:GO:0051560; P:GO:0070588	F:calcium channel activity; C:mitochondrial inner membrane; F:uniporter activity; C:integral component of membrane; P:mitochondrial calcium ion homeostasis; P:calcium ion transmembrane transport	EC:7	n/a	-	-	-	K20858	Calcium signaling pathway; Cellular senescence;
HORVU.MOREX.r3.4HG0350460.1	0	0	7.66145	19.2514	6.7282	0	13.4564	Inf	Inf	0.0257243	0.184599	hypothetical protein ZWY2020_052504	720	9	2.03E-143	74.73	-	-	-	-	-	-	-	-	-	-
HORVU.MOREX.r3.1HG0032000.1	0	0	7.66145	12.8342	5.12392	0	10.2478	Inf	Inf	0.0481216	0.26223	hypothetical protein ZWY2020_021451, partial	774	20	2.54E-154	96.27	-	-	-	-	-	-	-	-	-	-
HORVU.MOREX.r3.3HG0322010.1	1.20177	0	18.1959	33.6899	13.2719	0.600883	25.9429	43.1747	5.43211	0.011031	0.107358	rac guanine nucleotide exchange factor JJ-like	828	20	4.17E-170	85.07	-	-	-	-	-	-	-	-	-	-
HORVU.MOREX.r3.7HG0731000.1	4.20618	3.08965	149.398	248.663	101.339	3.64791	199.031	54.5602	5.76978	2.39E-08	2.94E-06	hypothetical protein CFC21_021060	471	20	8.18E-37	76.23	1	C:GO:0016020	C:membrane	-	-	-	-	-	-	-
HORVU.MOREX.r3.3HG0325170.1	0	0	13.4075	9.62568	5.7583	0	11.5166	Inf	Inf	0.0297945	0.20015	ABA/WDS induced protein	669	20	1.17E-69	82.4	-	-	-	-	-	-	-	-	-	-
HORVU.MOREX.r3.5HG0469780.1	0	0	0	25.6685	6.41712	0	12.8342	Inf	Inf	0.0406442	0.23937	F-box domain containing protein	1260	20	0	69.75	1	C:GO:0016021	C:integral component of membrane	-	-	-	-	-	-	-
HORVU.MOREX.r3.7HG0688900.1	1.20177	0	47.8841	107.487	39.1431	0.600883	77.6854	129.286	7.01442	4.55E-06	0.000224372	zinc finger BED domain-containing protein RICESLEEPER 2-like	693	20	8.07E-98	70.16	5	F:GO:0003677; C:GO:0005634; P:GO:0009791; F:GO:0046872; F:GO:0046983	F:DNA binding; C:nucleus; P:post-embryonic development; F:metal ion binding; F:protein dimerization activity	-	-	-	-	-	-	-
HORVU.MOREX.r3.5HG0510680.1	0.600883	0	25.8574	44.9198	17.8445	0.300441	35.3886	117.789	6.88006	0.0010224	0.0183665	predicted protein	693	20	9.88E-134	88.32	1	P:GO:0032196	P:transposition	-	-	-	-	-	-	-
HORVU.MOREX.r3.2HG0207360.1	6.00883	2.05977	51.7148	129.947	47.4325	4.0343	90.8307	22.5146	4.49279	0.000204689	0.00514049	ADP-ribosylation factor-like protein 8B-A	525	20	8.23E-68	61.42	3	F:GO:0003676; F:GO:0004523; P:GO:0090502	F:nucleic acid binding; F:RNA-DNA hybrid ribonuclease activity; P:RNA phosphodiester bond hydrolysis, endonucleolytic	-	-	-	-	-	-	-
HORVU.MOREX.r3.7HG0747300.1	51.6759	42.2252	598.551	837.434	382.471	46.9506	717.992	15.2925	3.93475	5.22E-06	0.000253778	putative disease resistance protein RGA4	3963	20	0	80.71	2	P:GO:0006952; F:GO:0043531	P:defense response; F:ADP binding	-	-	-	-	-	-	-
HORVU.MOREX.r3.6HG0628120.1	8.41236	6.1793	44.0533	49.7327	27.0944	7.29583	46.893	6.42737	2.68423	0.0335448	0.214457	cinnamoyl-CoA reductase 1-like	1038	20	0	96.37	1	F:GO:0003824	F:catalytic activity	-	-	-	-	-	K09753	Metabolic pathways; Biosynthesis of secondary metabolites; Phenylpropanoid biosynthesis;
HORVU.MOREX.r3.3HG0330220.1	0	0	26.8151	22.4599	12.3187	0	24.6375	Inf	Inf	0.00175869	0.0283512	GDSL esterase/lipase At5g45910-like	1134	20	0	96.99	1	F:GO:0016788	F:hydrolase activity, acting on ester bonds	EC:3.1; EC:3	Acting on ester bonds; Hydrolases	-	-	-	-	-
HORVU.MOREX.r3.7HG0655180.1	22.2327	10.2988	61.2916	89.8397	45.9157	16.2657	75.5656	4.64569	2.21589	0.0453408	0.254423	F-box protein At5g07610-like	1167	20	0	78.27	-	-	-	-	-	-	-	-	-	-
HORVU.MOREX.r3.2HG0107500.1	3.6053	0	36.3919	54.5455	23.6357	1.80265	45.4687	25.2233	4.65668	0.00301756	0.0426881	uncharacterized protein LOC123425117	2610	20	0	84.62	-	-	-	-	-	-	-	-	-	-
HORVU.MOREX.r3.1HG0000810.1	2.40353	4.11953	18.1959	65.7755	22.6236	3.26153	41.9857	12.873	3.68628	0.0126889	0.118303	gamma 1 hordein	1032	20	8.42E-71	89.36	2	C:GO:0005773; F:GO:0045735	C:vacuole; F:nutrient reservoir activity	-	-	-	-	-	-	-
HORVU.MOREX.r3.2HG0187650.1	11.4168	12.3586	431.914	660.963	279.163	11.8877	546.439	45.9668	5.52252	2.03E-09	3.88E-07	protein MAIN-LIKE 2-like	723	20	0	96.26	1	P:GO:0010073	P:meristem maintenance	-	-	-	-	-	-	-
HORVU.MOREX.r3.1HG0018630.1	0	0	14.3652	20.8556	8.80521	0	17.6104	Inf	Inf	0.00917886	0.094598	B3 domain-containing protein	555	20	4.87E-107	91.84	-	-	-	-	-	-	-	-	-	-
HORVU.MOREX.r3.4HG0342770.1	0	0	8.61913	12.8342	5.36334	0	10.7267	Inf	Inf	0.042105	0.243846	hypothetical protein D1007_62144	552	20	3.24E-110	86.96	-	-	-	-	-	-	-	-	-	-
HORVU.MOREX.r3.1HG0081010.1	0	0	13.4075	22.4599	8.96686	0	17.9337	Inf	Inf	0.00894512	0.0926724	hypothetical protein ZWY2020_017936	615	20	2.08E-63	78.96	-	-	-	-	-	-	-	-	-	-
HORVU.MOREX.r3.6HG0600670.1	0	0	17.2383	16.0428	8.32027	0	16.6405	Inf	Inf	0.00991043	0.0994619	hypothetical protein ZWY2020_032988, partial	774	20	6.95E-147	93.87	-	-	-	-	-	-	-	-	-	-
HORVU.MOREX.r3.7HG0685270.1	0	0	9.57681	12.8342	5.60276	0	11.2055	Inf	Inf	0.0369057	0.226003	cysteine protease 1-like	1434	20	0	89.85	3	P:GO:0006508; F:GO:0008234; P:GO:0009555	P:proteolysis; F:cysteine-type peptidase activity; P:pollen development	EC:3.4; EC:3	Acting on peptide bonds (peptidases); Hydrolases	-	-	-	-	-
HORVU.MOREX.r3.7HG0703370.1	9.61412	12.3586	869.575	1318.72	552.566	10.9864	1094.15	99.5913	6.63795	1.80E-11	1.33E-08	transposase family protein	516	20	3.49E-95	85.44	2	F:GO:0003676; P:GO:0015074	F:nucleic acid binding; P:DNA integration	-	-	-	-	-	-	-
HORVU.MOREX.r3.1HG0074990.1	1.20177	2.05977	54.5878	93.0482	37.7244	1.63077	73.818	45.2659	5.50035	2.93E-05	0.00104306	hypothetical protein ZWY2020_021451, partial	705	20	1.23E-137	93.66	-	-	-	-	-	-	-	-	-	-
HORVU.MOREX.r3.2HG0196450.1	0	0	12.4499	12.8342	6.32102	0	12.642	Inf	Inf	0.0249225	0.1812	ATP-dependent DNA helicase PIF1-like	1749	20	0	86.19	7	P:GO:0000723; F:GO:0003678; F:GO:0005524; P:GO:0006281; P:GO:0006310; F:GO:0016887; P:GO:0032508	P:telomere maintenance; F:DNA helicase activity; F:ATP binding; P:DNA repair; P:DNA recombination; F:ATP hydrolysis activity; P:DNA duplex unwinding	EC:3.6.1; EC:3.6; EC:3; EC:3.6.1.15	Acting on acid anhydrides; Acting on acid anhydrides; Hydrolases; Nucleoside-triphosphate phosphatase	-	-	-	-	-
HORVU.MOREX.r3.2HG0189940.1	33.0485	63.8528	1.91536	4.81284	25.9074	48.4507	3.3641	0.0694335	-3.84822	0.00446237	0.0566587	histone H4	312	20	4.12E-50	100	7	C:GO:0000786; F:GO:0003677; C:GO:0005634; P:GO:0006334; P:GO:0006352; P:GO:0009414; F:GO:0046982	C:nucleosome; F:DNA binding; C:nucleus; P:nucleosome assembly; P:DNA-templated transcription initiation; P:response to water deprivation; F:protein heterodimerization activity	-	-	-	-	-	K11254	-
HORVU.MOREX.r3.1HG0090890.1	1.20177	0	23.942	33.6899	14.7084	0.600883	28.816	47.956	5.58364	0.00622945	0.0718099	ATP-dependent DNA helicase PIF1-like	1758	20	0	87.89	7	P:GO:0000723; F:GO:0003678; F:GO:0005524; P:GO:0006281; P:GO:0006310; F:GO:0016887; P:GO:0032508	P:telomere maintenance; F:DNA helicase activity; F:ATP binding; P:DNA repair; P:DNA recombination; F:ATP hydrolysis activity; P:DNA duplex unwinding	EC:3.6.1; EC:3.6; EC:3; EC:3.6.1.15	Acting on acid anhydrides; Acting on acid anhydrides; Hydrolases; Nucleoside-triphosphate phosphatase	-	-	-	-	-
HORVU.MOREX.r3.1HG0067880.1	9.61412	9.26895	174.298	282.353	118.884	9.44154	228.326	24.1831	4.59593	8.85E-07	6.08E-05	Cytokinin-O-glucosyltransferase 2	1992	20	0	77.76	-	-	-	-	-	-	-	-	-	-
HORVU.MOREX.r3.5HG0500550.1	1.20177	0	34.4765	67.3797	25.7645	0.600883	50.9281	84.7556	6.40524	0.000181634	0.00468716	homeobox-leucine zipper protein ROC6-like	2331	20	0	77.94	5	F:GO:0000981; F:GO:0003677; C:GO:0005634; P:GO:0006357; F:GO:0008289	F:DNA-binding transcription factor activity, RNA polymerase II-specific; F:DNA binding; C:nucleus; P:regulation of transcription by RNA polymerase II; F:lipid binding	-	-	-	-	-	-	-
HORVU.MOREX.r3.2HG0193100.1	21.0309	17.508	109.176	137.968	71.4207	19.2695	123.572	6.41284	2.68096	0.00412093	0.0534071	alkylated DNA repair protein ALKBH8 homolog	1047	20	0	91.05	1	F:GO:0003723	F:RNA binding	-	-	-	-	-	-	-
HORVU.MOREX.r3.3HG0295310.1	0	0	22.0267	19.2514	10.3195	0	20.639	Inf	Inf	0.0040884	0.0530772	probable auxin efflux carrier component 9	1293	20	0	87.51	7	C:GO:0005783; C:GO:0005886; P:GO:0009926; P:GO:0010252; P:GO:0010315; F:GO:0010329; C:GO:0016021	C:endoplasmic reticulum; C:plasma membrane; P:auxin polar transport; P:auxin homeostasis; P:auxin export across the plasma membrane; F:auxin efflux transmembrane transporter activity; C:integral component of membrane	EC:7	n/a	-	-	-	-	-
HORVU.MOREX.r3.3HG0325710.1	4.20618	3.08965	52.6725	86.6311	36.6499	3.64791	69.6518	19.0936	4.25502	0.00063978	0.0127227	mutator protein	1854	20	0	88.96	-	-	-	-	-	-	-	-	-	-
HORVU.MOREX.r3.6HG0624490.1	7.21059	2.05977	85.2336	162.032	64.1341	4.63518	123.633	26.6727	4.73729	1.87E-05	0.000727046	uncharacterized protein LOC123406179	1434	20	0	83.32	1	F:GO:0005488	F:binding	-	-	-	-	-	-	-
HORVU.MOREX.r3.3HG0253820.1	1.20177	2.05977	23.942	24.0642	12.8169	1.63077	24.0031	14.7189	3.8796	0.0281266	0.194334	hypothetical protein ZWY2020_020772	576	20	1.35E-53	88.77	-	-	-	-	-	-	-	-	-	-
HORVU.MOREX.r3.4HG0339240.1	13.2194	15.4483	76.6145	117.112	55.5986	14.3338	96.8635	6.75768	2.75653	0.00574058	0.0676745	zinc finger BED domain-containing protein RICESLEEPER 2-like isoform X1	1665	20	1.08E-179	66.83	1	F:GO:0005488	F:binding	-	-	-	-	-	-	-
HORVU.MOREX.r3.6HG0571590.1	1.20177	0	64.1646	113.904	44.8176	0.600883	89.0343	148.172	7.21113	9.18E-07	6.24E-05	hypothetical protein D1007_29172	477	20	1.76E-114	90.43	-	-	-	-	-	-	-	-	-	-
HORVU.MOREX.r3.7HG0739510.1	0	0	49.7994	85.0268	33.7066	0	67.4131	Inf	Inf	9.37E-07	6.31E-05	predicted protein	693	20	1.52E-134	87.63	1	P:GO:0032196	P:transposition	-	-	-	-	-	-	-
HORVU.MOREX.r3.3HG0314210.1	25.8379	28.8367	300.712	426.738	195.531	27.3373	363.725	13.3051	3.7339	1.07E-05	0.000457277	protein SRG1	1350	20	0	93.06	3	F:GO:0046872; F:GO:0051213; P:GO:1901601	F:metal ion binding; F:dioxygenase activity; P:strigolactone biosynthetic process	EC:1	Oxidoreductases	-	-	-	-	-
HORVU.MOREX.r3.5HG0478090.1	13.2194	17.508	393.607	625.669	262.501	15.3637	509.638	33.1715	5.05187	1.73E-08	2.22E-06	zinc finger BED domain-containing protein DAYSLEEPER-like	2055	20	0	78.93	5	F:GO:0003677; C:GO:0005634; P:GO:0009791; F:GO:0046872; F:GO:0046983	F:DNA binding; C:nucleus; P:post-embryonic development; F:metal ion binding; F:protein dimerization activity	-	-	-	-	-	-	-
HORVU.MOREX.r3.5HG0478430.1	10.8159	14.4184	706.769	1182.35	478.589	12.6171	944.561	74.8634	6.22619	9.71E-11	4.10E-08	40S ribosomal protein S5-1	726	20	1.34E-120	85.3	-	-	-	-	-	-	-	-	-	-
HORVU.MOREX.r3.1HG0018480.1	9.61412	5.14942	29.6881	86.6311	32.7707	7.38177	58.1596	7.87882	2.97798	0.0225972	0.170433	Ycf2 protein	570	20	4.10E-135	97.52	3	F:GO:0000166; C:GO:0009507; C:GO:0016021	F:nucleotide binding; C:chloroplast; C:integral component of membrane	-	-	-	-	-	-	-
HORVU.MOREX.r3.4HG0370370.1	4.80706	1.02988	40.2226	65.7755	27.9588	2.91847	52.999	18.1599	4.18268	0.00307874	0.0432941	predicted protein	693	20	1.70E-141	87.13	1	P:GO:0032196	P:transposition	-	-	-	-	-	-	-
HORVU.MOREX.r3.3HG0253200.1	3.00441	4.11953	55.5455	70.5883	33.3144	3.56197	63.0669	17.7056	4.14613	0.000795361	0.0150893	hypothetical protein ZWY2020_025172	738	20	1.86E-151	87.44	-	-	-	-	-	-	-	-	-	-
HORVU.MOREX.r3.7HG0654440.1	8.41236	7.20919	49.7994	83.4225	37.2109	7.81077	66.611	8.52809	3.09222	0.00830859	0.0884452	ABC transporter C family member 10-like	3807	20	0	95.57	4	F:GO:0005524; C:GO:0016021; P:GO:0055085; F:GO:0140359	F:ATP binding; C:integral component of membrane; P:transmembrane transport; F:ABC-type transporter activity	EC:7	n/a	-	-	-	-	-
HORVU.MOREX.r3.2HG0202640.1	24.0353	29.8666	136.948	182.888	93.4346	26.951	159.918	5.93367	2.56893	0.0029745	0.0422222	universal stress protein A-like protein isoform X2	480	20	1.58E-112	96.51	-	-	-	-	-	-	-	-	-	-
HORVU.MOREX.r3.1HG0062240.1	1.20177	5.14942	60.3339	107.487	43.543	3.17559	83.9103	26.4235	4.72375	4.82E-05	0.0015877	retrotransposon protein, putative, Ty3-gypsy subclass	1563	20	0	90.7	8	F:GO:0003676; F:GO:0003964; F:GO:0004519; P:GO:0006278; P:GO:0006508; F:GO:0008234; F:GO:0008270; P:GO:0090305	F:nucleic acid binding; F:RNA-directed DNA polymerase activity; F:endonuclease activity; P:RNA-templated DNA biosynthetic process; P:proteolysis; F:cysteine-type peptidase activity; F:zinc ion binding; P:nucleic acid phosphodiester bond hydrolysis	EC:3.1; EC:3.4; EC:2.7; EC:2; EC:3; EC:2.7.7.49; EC:2.7.7	Acting on ester bonds; Acting on peptide bonds (peptidases); Transferring phosphorus-containing groups; Transferases; Hydrolases; RNA-directed DNA polymerase; Transferring phosphorus-containing groups	-	-	-	-	-
HORVU.MOREX.r3.2HG0198440.1	6.00883	2.05977	24.8997	46.5241	19.8731	4.0343	35.7119	8.85208	3.14602	0.046064	0.256784	receptor kinase-like protein Xa21	2589	20	0	85.18	4	F:GO:0004672; F:GO:0005524; P:GO:0006468; C:GO:0016021	F:protein kinase activity; F:ATP binding; P:protein phosphorylation; C:integral component of membrane	EC:2.7.1; EC:2.7; EC:2	Transferring phosphorus-containing groups; Transferring phosphorus-containing groups; Transferases	-	-	-	-	-
HORVU.MOREX.r3.1HG0045800.1	2.40353	10.2988	100.557	78.6097	47.9672	6.35118	89.5831	14.105	3.81813	0.000152021	0.00409738	D-3-phosphoglycerate dehydrogenase, chloroplastic	2682	20	0	91.39	-	-	-	-	-	-	-	-	-	-
HORVU.MOREX.r3.3HG0301090.1	0	2.05977	29.6881	27.2728	14.7552	1.02988	28.4804	27.654	4.78942	0.00541928	0.065151	hypothetical protein ZWY2020_038257	603	20	4.31E-66	82.3	-	-	-	-	-	-	-	-	-	-
HORVU.MOREX.r3.2HG0136750.1	0	0	5.74609	24.0642	7.45257	0	14.9051	Inf	Inf	0.0209979	0.162861	hypothetical protein ZWY2020_059905	357	20	1.05E-34	91.99	-	-	-	-	-	-	-	-	-	-
HORVU.MOREX.r3.3HG0307490.1	0	2.05977	9.57681	38.5027	12.5348	1.02988	24.0398	23.3422	4.54487	0.0185406	0.150838	Stearoyl-[acyl-carrier-protein] 9-desaturase 1, chloroplastic	1137	20	0	93.85	5	P:GO:0006633; C:GO:0009507; F:GO:0045300; F:GO:0046872; F:GO:0102786	P:fatty acid biosynthetic process; C:chloroplast; F:acyl-[acyl-carrier-protein] desaturase activity; F:metal ion binding; F:stearoyl-[acp] desaturase activity	EC:1.14.19.2; EC:1; EC:1.14; EC:1.14.19	Stearoyl-[acyl-carrier-protein] 9-desaturase; Oxidoreductases; Acting on paired donors, with incorporation or reduction of molecular oxygen. The oxygen incorporated need not be derived from O(2); Acting on paired donors, with incorporation or reduction of molecular oxygen. The oxygen incorporated need not be derived from O(2)	-	-	-	K03921	Metabolic pathways;
HORVU.MOREX.r3.7HG0719880.1	0	0	9.57681	11.23	5.20169	0	10.4034	Inf	Inf	0.0429817	0.246587	predicted protein	747	20	1.46E-87	79.38	-	-	-	-	-	-	-	-	-	-
HORVU.MOREX.r3.1HG0023240.1	0	0	9.57681	11.23	5.20169	0	10.4034	Inf	Inf	0.0429817	0.246587	hypothetical protein ZWY2020_032988, partial	774	20	5.30E-154	96.06	-	-	-	-	-	-	-	-	-	-
HORVU.MOREX.r3.4HG0352300.1	2.40353	4.11953	46.9264	51.3369	26.1966	3.26153	49.1317	15.064	3.91303	0.00288098	0.0413638	CBL-interacting protein kinase 15-like	1335	20	0	96.74	7	F:GO:0004674; F:GO:0004712; F:GO:0005524; P:GO:0006468; P:GO:0007165; C:GO:0016021; F:GO:0106310	F:protein serine/threonine kinase activity; F:protein serine/threonine/tyrosine kinase activity; F:ATP binding; P:protein phosphorylation; P:signal transduction; C:integral component of membrane; F:protein serine kinase activity	EC:2.7.1; EC:2.7.12.1; EC:2.7; EC:2	Transferring phosphorus-containing groups; Dual-specificity kinase; Transferring phosphorus-containing groups; Transferases	-	-	-	K07198	FoxO signaling pathway; AMPK signaling pathway; Glucagon signaling pathway; Adipocytokine signaling pathway; Oxytocin signaling pathway; Axon regeneration;
HORVU.MOREX.r3.5HG0454290.1	0	0	78.5299	83.4225	40.4881	0	80.9762	Inf	Inf	8.93E-08	8.64E-06	predicted protein	774	20	3.55E-154	84.49	1	P:GO:0032196	P:transposition	-	-	-	-	-	-	-
HORVU.MOREX.r3.7HG0642050.1	13.8203	13.3885	75.6568	59.3583	40.556	13.6044	67.5076	4.96219	2.31098	0.0243088	0.178361	oligopeptide transporter 7-like	2325	20	0	94.85	4	C:GO:0005887; P:GO:0015031; P:GO:0035672; F:GO:0035673	C:integral component of plasma membrane; P:protein transport; P:oligopeptide transmembrane transport; F:oligopeptide transmembrane transporter activity	EC:7	n/a	-	-	-	-	-
HORVU.MOREX.r3.7HG0733610.1	0	0	8.61913	27.2728	8.97297	0	17.9459	Inf	Inf	0.0106129	0.104384	hypothetical protein ZWY2020_013110	357	20	1.58E-33	95.38	-	-	-	-	-	-	-	-	-	-
HORVU.MOREX.r3.3HG0286560.1	1.20177	6.1793	20.1113	41.7113	17.3009	3.69053	30.9113	8.37583	3.06623	0.0400555	0.237693	subtilisin-like protease SBT4.15	456	20	3.85E-74	85.07	-	-	-	-	-	-	-	-	-	-
HORVU.MOREX.r3.2HG0201870.1	1.20177	5.14942	27.7728	33.6899	16.9535	3.17559	30.7313	9.67735	3.27461	0.026841	0.189426	DNA topoisomerase 1 beta-like	2421	20	0	87.76	5	F:GO:0003677; F:GO:0003917; C:GO:0005634; C:GO:0005694; P:GO:0006265	F:DNA binding; F:DNA topoisomerase type I (single strand cut, ATP-independent) activity; C:nucleus; C:chromosome; P:DNA topological change	EC:5.6.2.1; EC:5	n/a; Isomerases	-	-	-	-	-
HORVU.MOREX.r3.7HG0652220.1	0	0	13.4075	12.8342	6.56044	0	13.1209	Inf	Inf	0.0219018	0.166802	3-ketoacyl-CoA synthase 5-like	1359	20	0	84.62	3	P:GO:0006633; C:GO:0016021; F:GO:0016747	P:fatty acid biosynthetic process; C:integral component of membrane; F:acyltransferase activity, transferring groups other than amino-acyl groups	EC:2.3; EC:2; EC:2.3.1	Acyltransferases; Transferases; Acyltransferases	-	-	-	-	-
HORVU.MOREX.r3.3HG0319770.1	0	0	6.70377	16.0428	5.68664	0	11.3733	Inf	Inf	0.0403694	0.238313	hypothetical protein ZWY2020_021451, partial	774	20	2.04E-155	96.58	-	-	-	-	-	-	-	-	-	-
HORVU.MOREX.r3.1HG0094660.1	1.20177	1.02988	27.7728	20.8556	12.715	1.11582	24.3142	21.7903	4.44562	0.0167917	0.142343	retrotransposon protein, putative, unclassified, expressed	489	20	8.04E-29	59.07	8	F:GO:0003676; F:GO:0003964; F:GO:0004523; P:GO:0006278; C:GO:0016020; C:GO:0016021; F:GO:0046872; P:GO:0090502	F:nucleic acid binding; F:RNA-directed DNA polymerase activity; F:RNA-DNA hybrid ribonuclease activity; P:RNA-templated DNA biosynthetic process; C:membrane; C:integral component of membrane; F:metal ion binding; P:RNA phosphodiester bond hydrolysis, endonucleolytic	-	-	-	-	-	-	-
HORVU.MOREX.r3.5HG0469630.1	0	0	16.2806	17.6471	8.48191	0	16.9638	Inf	Inf	0.00966108	0.0978223	putative calcium-binding protein CML16	708	20	1.63E-144	93.82	-	-	-	-	-	-	-	-	-	-
HORVU.MOREX.r3.5HG0482110.1	11.4168	15.4483	74.6991	126.738	57.0756	13.4325	100.719	7.49812	2.90653	0.00352511	0.047676	disease resistance protein RGA5-like	2973	20	0	65.45	3	P:GO:0006952; F:GO:0030246; F:GO:0043531	P:defense response; F:carbohydrate binding; F:ADP binding	-	-	-	-	-	-	-
HORVU.MOREX.r3.7HG0751240.1	0	0	9.57681	11.23	5.20169	0	10.4034	Inf	Inf	0.0429817	0.246587	zinc finger MYM-type protein 1-like	441	20	2.59E-78	86.91	1	F:GO:0046983	F:protein dimerization activity	-	-	-	-	-	-	-
HORVU.MOREX.r3.4HG0395850.1	0	2.05977	14.3652	64.1712	20.149	1.02988	39.2682	38.1288	5.25281	0.00170315	0.0276937	hypothetical protein ZWY2020_032988, partial	690	20	7.98E-138	95.52	-	-	-	-	-	-	-	-	-	-
HORVU.MOREX.r3.5HG0487670.1	3.00441	2.05977	27.7728	46.5241	19.8403	2.53209	37.1484	14.6711	3.8749	0.0133582	0.122594	hypothetical protein ZWY2020_038385	576	20	8.49E-81	71.55	-	-	-	-	-	-	-	-	-	-
HORVU.MOREX.r3.UnG0786740.1	2.40353	4.11953	27.7728	32.0856	16.5954	3.26153	29.9292	9.17642	3.19793	0.0367996	0.226003	ATP-dependent DNA helicase DDM1-like	2358	20	0	95.03	3	F:GO:0005524; P:GO:0006338; F:GO:0140658	F:ATP binding; P:chromatin remodeling; F:ATP-dependent chromatin remodeler activity	-	-	-	-	-	-	-
HORVU.MOREX.r3.2HG0218080.1	1.20177	1.02988	38.3073	51.3369	22.969	1.11582	44.8221	40.1695	5.32803	0.000775882	0.0148021	hypothetical protein ZWY2020_054565	576	20	7.43E-54	89.14	-	-	-	-	-	-	-	-	-	-
HORVU.MOREX.r3.2HG0123850.1	12.0177	21.6276	88.1067	62.5669	46.0797	16.8226	75.3368	4.47831	2.16295	0.0198051	0.15715	pentatricopeptide repeat-containing protein At5g64320, mitochondrial	2055	20	0	94.31	-	-	-	-	-	-	-	-	-	-
HORVU.MOREX.r3.1HG0029210.1	0	0	74.6991	118.717	48.354	0	96.7079	Inf	Inf	1.55E-08	2.07E-06	hypothetical protein ZWY2020_021451, partial	612	20	2.61E-130	93.19	-	-	-	-	-	-	-	-	-	-
HORVU.MOREX.r3.4HG0407810.1	0	0	18.1959	24.0642	10.565	0	21.1301	Inf	Inf	0.00423693	0.0545267	zinc finger MYM-type protein 1-like	273	20	2.29E-58	96.78	1	F:GO:0046983	F:protein dimerization activity	-	-	-	-	-	-	-
HORVU.MOREX.r3.1HG0020430.1	1.20177	0	20.1113	46.5241	16.9593	0.600883	33.3177	55.448	5.79306	0.00363479	0.0486517	retrotransposon protein, putative, unclassified	738	20	1.93E-120	79.89	4	F:GO:0003676; F:GO:0004523; F:GO:0008270; P:GO:0090502	F:nucleic acid binding; F:RNA-DNA hybrid ribonuclease activity; F:zinc ion binding; P:RNA phosphodiester bond hydrolysis, endonucleolytic	EC:3.1.30; EC:3.1; EC:3; EC:3.1.26; EC:3.1.26.4	Acting on ester bonds; Acting on ester bonds; Hydrolases; Acting on ester bonds; Ribonuclease H	-	-	-	-	-
HORVU.MOREX.r3.3HG0267900.1	0	0	33.5188	40.107	18.4065	0	36.8129	Inf	Inf	0.000183578	0.00473055	hypothetical protein ZWY2020_004145	705	20	3.72E-162	94.86	-	-	-	-	-	-	-	-	-	-
HORVU.MOREX.r3.3HG0233420.1	5.40794	9.26895	72.7838	145.989	58.3625	7.33845	109.387	14.906	3.89782	0.000169654	0.00445119	retrotransposon protein, putative, unclassified	2427	20	0	66.04	3	F:GO:0005488; P:GO:0090304; F:GO:0140640	F:binding; P:nucleic acid metabolic process; F:catalytic activity, acting on a nucleic acid	-	-	-	-	-	-	-
HORVU.MOREX.r3.5HG0489290.1	0	6.1793	73.7415	73.7969	38.4294	3.08965	73.7692	23.8762	4.5775	5.85E-05	0.00186254	heavy metal-associated isoprenylated plant protein 41-like	699	20	9.55E-126	83.33	3	C:GO:0005737; F:GO:0070042; P:GO:0070475	C:cytoplasm; F:rRNA (uridine-N3-)-methyltransferase activity; P:rRNA base methylation	EC:2.1; EC:2; EC:2.1.1	Transferring one-carbon groups; Transferases; Transferring one-carbon groups	-	-	-	-	-
HORVU.MOREX.r3.7HG0673290.1	0	0	23.942	25.6685	12.4026	0	24.8053	Inf	Inf	0.00186427	0.0296333	hypothetical protein ZWY2020_049154	1299	20	0	86.8	1	C:GO:0016021	C:integral component of membrane	-	-	-	-	-	-	-
HORVU.MOREX.r3.5HG0419840.1	1.20177	2.05977	30.6458	72.1926	26.525	1.63077	51.4192	31.5307	4.97869	0.000684672	0.0134446	MADS-box transcription factor 25-like	699	20	4.83E-154	94.24	5	F:GO:0000978; F:GO:0000981; C:GO:0005634; P:GO:0045944; F:GO:0046983	F:RNA polymerase II cis-regulatory region sequence-specific DNA binding; F:DNA-binding transcription factor activity, RNA polymerase II-specific; C:nucleus; P:positive regulation of transcription by RNA polymerase II; F:protein dimerization activity	-	-	-	-	-	-	-
HORVU.MOREX.r3.7HG0686780.1	0	1.02988	49.7994	94.6525	36.3705	0.514942	72.226	140.26	7.13196	2.58E-06	0.000141153	predicted protein	669	20	2.41E-150	90.28	1	P:GO:0032196	P:transposition	-	-	-	-	-	-	-
HORVU.MOREX.r3.1HG0092420.1	3.6053	2.05977	28.7304	25.6685	15.016	2.83253	27.1995	9.60253	3.26341	0.0478719	0.26223	WRKY transcription factor 71-like	930	20	7.85E-170	87.04	5	F:GO:0003700; C:GO:0005634; P:GO:0006355; F:GO:0043565; P:GO:0050896	F:DNA-binding transcription factor activity; C:nucleus; P:regulation of DNA-templated transcription; F:sequence-specific DNA binding; P:response to stimulus	-	-	-	-	-	-	-
HORVU.MOREX.r3.2HG0181350.1	14.4212	12.3586	84.276	102.674	53.4324	13.3899	93.4749	6.98101	2.80344	0.00547209	0.0655269	retrotransposon protein, putative, unclassified	2673	20	0	72.68	3	F:GO:0003676; P:GO:0015074; F:GO:0016779	F:nucleic acid binding; P:DNA integration; F:nucleotidyltransferase activity	EC:2.7; EC:2; EC:2.7.7	Transferring phosphorus-containing groups; Transferases; Transferring phosphorus-containing groups	-	-	-	-	-
HORVU.MOREX.r3.6HG0540130.1	39.0574	42.2252	878.194	1074.87	508.586	40.6413	976.531	24.028	4.58665	2.20E-07	1.88E-05	---NA---	213	-	-	-	-	-	-	-	-	-	-	-	-	-
HORVU.MOREX.r3.2HG0189820.1	4.80706	2.05977	29.6881	40.107	19.1655	3.43341	34.8976	10.1641	3.34541	0.0316553	0.207562	U-box domain-containing protein 38-like	420	20	7.71E-78	91.23	-	-	-	-	-	-	-	-	-	-
HORVU.MOREX.r3.5HG0437920.1	1.20177	0	14.3652	24.0642	9.90779	0.600883	19.2147	31.9775	4.99898	0.032657	0.211179	FBD-associated F-box protein At5g60610-like	1146	20	0	91.1	-	-	-	-	-	-	-	-	-	-
HORVU.MOREX.r3.7HG0662380.1	0	0	13.4075	11.23	6.15937	0	12.3187	Inf	Inf	0.0255599	0.184044	pathogenesis-related protein 1-like	483	20	1.50E-114	95	10	F:GO:0004864; C:GO:0005634; C:GO:0005737; P:GO:0006952; P:GO:0009607; P:GO:0009738; F:GO:0010427; F:GO:0038023; P:GO:0043086; P:GO:0080163	F:protein phosphatase inhibitor activity; C:nucleus; C:cytoplasm; P:defense response; P:response to biotic stimulus; P:abscisic acid-activated signaling pathway; F:abscisic acid binding; F:signaling receptor activity; P:negative regulation of catalytic activity; P:regulation of protein serine/threonine phosphatase activity	-	-	-	-	-	-	-
HORVU.MOREX.r3.5HG0469370.1	0	0	14.3652	22.4599	9.20628	0	18.4126	Inf	Inf	0.00791845	0.0852102	Elongation factor 1-alpha	471	20	8.77E-95	74.66	1	F:GO:0003824	F:catalytic activity	-	-	-	-	-	-	-
HORVU.MOREX.r3.4HG0397120.1	0	0	7.66145	16.0428	5.92606	0	11.8521	Inf	Inf	0.0352772	0.220637	eudesmanediol synthase-like isoform X1	426	20	1.07E-86	84.09	3	F:GO:0000287; F:GO:0010333; P:GO:0016102	F:magnesium ion binding; F:terpene synthase activity; P:diterpenoid biosynthetic process	EC:4.2; EC:4; EC:4.2.3	Carbon-oxygen lyases; Lyases; Carbon-oxygen lyases	-	-	-	-	-
HORVU.MOREX.r3.3HG0253720.1	1.20177	1.02988	23.942	49.7327	18.9766	1.11582	36.8374	33.0136	5.04499	0.00348653	0.0472598	MAP7 domain-containing protein 1-like isoform X1	558	20	3.97E-140	77.4	-	-	-	-	-	-	-	-	-	-
HORVU.MOREX.r3.1HG0035600.1	0	0	4.78841	19.2514	6.00994	0	12.0199	Inf	Inf	0.0386167	0.23209	hypothetical protein ZWY2020_037552	426	20	1.94E-70	76.02	-	-	-	-	-	-	-	-	-	-
HORVU.MOREX.r3.7HG0679830.1	0	0	7.66145	44.9198	13.1453	0	26.2906	Inf	Inf	0.00243376	0.0362601	grf zinc finger family expressed	474	20	2.38E-91	86.4	-	-	-	-	-	-	-	-	-	-
HORVU.MOREX.r3.1HG0051520.1	0	0	3.83073	25.6685	7.3748	0	14.7496	Inf	Inf	0.0234085	0.173965	protein DETOXIFICATION 49-like	1659	20	0	92.26	4	F:GO:0015297; C:GO:0016021; F:GO:0042910; P:GO:1990961	F:antiporter activity; C:integral component of membrane; F:xenobiotic transmembrane transporter activity; P:xenobiotic detoxification by transmembrane export across the plasma membrane	EC:7	n/a	-	-	-	-	-
HORVU.MOREX.r3.5HG0537500.1	0	2.05977	17.2383	32.0856	12.8459	1.02988	24.6619	23.9463	4.58173	0.0133118	0.122463	uncharacterized protein LOC123397464	1704	20	0	91.41	-	-	-	-	-	-	-	-	-	-
HORVU.MOREX.r3.7HG0701760.1	4.80706	0	62.2493	93.0482	40.0261	2.40353	77.6488	32.3061	5.01374	0.000129942	0.00361115	NAD(P)H dehydrogenase (quinone) FQR1-like	615	20	3.02E-146	94.09	3	F:GO:0008753; F:GO:0010181; F:GO:0050136	F:NADPH dehydrogenase (quinone) activity; F:FMN binding; F:NADH dehydrogenase (quinone) activity	EC:1.6; EC:1.6.5.10; EC:1; EC:1.6.5.11; EC:1.6.5; EC:1.6.5.2	Acting on NADH or NADPH; NADPH dehydrogenase (quinone); Oxidoreductases; NADH dehydrogenase (quinone); Acting on NADH or NADPH; NAD(P)H dehydrogenase (quinone)	-	-	-	K03809	Metabolic pathways; Biosynthesis of secondary metabolites; Biosynthesis of cofactors; Ubiquinone and other terpenoid-quinone biosynthesis;
HORVU.MOREX.r3.2HG0133200.1	0	0	30.6458	72.1926	25.7096	0	51.4192	Inf	Inf	1.63E-05	0.000646351	predicted protein	693	20	8.95E-127	87.53	1	P:GO:0032196	P:transposition	-	-	-	-	-	-	-
HORVU.MOREX.r3.2HG0210450.1	0	0	18.1959	12.8342	7.75755	0	15.5151	Inf	Inf	0.0117574	0.112324	hypothetical protein ZWY2020_011953	879	20	1.58E-162	72.78	-	-	-	-	-	-	-	-	-	-
HORVU.MOREX.r3.5HG0509280.1	124.984	217.305	27.7728	28.877	99.7347	171.145	28.3249	0.165503	-2.59507	0.00285222	0.0410608	predicted protein	915	20	0	89.66	1	C:GO:0016021	C:integral component of membrane	-	-	-	-	-	-	-
HORVU.MOREX.r3.5HG0423260.1	147.216	84.4505	439.576	798.931	367.543	115.833	619.253	5.34607	2.41848	0.00536923	0.0646172	hypothetical chloroplast RF73	198	20	1.39E-20	95.83	3	C:GO:0005739; C:GO:0009507; C:GO:0016021	C:mitochondrion; C:chloroplast; C:integral component of membrane	-	-	-	-	-	-	-
HORVU.MOREX.r3.3HG0280180.1	9.01324	7.20919	77.5722	80.214	43.5021	8.11121	78.8931	9.72642	3.28191	0.00251152	0.0371679	Ethylene-responsive transcription factor CRF1	399	20	1.24E-37	80.67	-	-	-	-	-	-	-	-	-	-
HORVU.MOREX.r3.2HG0119980.1	0	0	17.2383	41.7113	14.7374	0	29.4748	Inf	Inf	0.0010395	0.0185682	putative CBL-interacting protein kinase 13	798	20	8.70E-134	89.15	-	-	-	-	-	-	-	-	-	-
HORVU.MOREX.r3.1HG0078780.1	4.80706	0	41.1803	70.5883	29.1439	2.40353	55.8843	23.2509	4.53922	0.00167041	0.0272557	protein ALP1-like	702	20	1.18E-159	93.54	5	F:GO:0004518; C:GO:0005634; C:GO:0016021; F:GO:0046872; P:GO:0090305	F:nuclease activity; C:nucleus; C:integral component of membrane; F:metal ion binding; P:nucleic acid phosphodiester bond hydrolysis	EC:3.1; EC:3	Acting on ester bonds; Hydrolases	-	-	-	-	-
HORVU.MOREX.r3.3HG0308740.1	1.20177	1.02988	14.3652	30.4813	11.7695	1.11582	22.4233	20.0957	4.32881	0.0320045	0.209218	increased DNA methylation 1-like isoform X1	2094	20	0	81.64	3	F:GO:0008080; F:GO:0016740; F:GO:0046872	F:N-acetyltransferase activity; F:transferase activity; F:metal ion binding	-	-	-	-	-	-	-
HORVU.MOREX.r3.2HG0161270.1	1.20177	2.05977	66.08	57.7541	31.7739	1.63077	61.917	37.9681	5.24671	8.31E-05	0.00248395	unnamed protein product	381	20	1.82E-42	82.65	1	C:GO:0016021	C:integral component of membrane	-	-	-	-	-	-	-
HORVU.MOREX.r3.7HG0653960.1	0	0	13.4075	28.877	10.5711	0	21.1423	Inf	Inf	0.00496052	0.0610631	Auxin-induced protein 5NG4	423	20	5.49E-86	81.92	-	-	-	-	-	-	-	-	-	-
HORVU.MOREX.r3.2HG0099700.1	0	0	17.2383	27.2728	11.1278	0	22.2555	Inf	Inf	0.00357737	0.0481235	G-type lectin S-receptor-like serine/threonine-protein kinase At1g11300	1125	20	0	93.22	7	F:GO:0004674; F:GO:0004712; F:GO:0005524; P:GO:0006468; C:GO:0016021; P:GO:0048544; F:GO:0106310	F:protein serine/threonine kinase activity; F:protein serine/threonine/tyrosine kinase activity; F:ATP binding; P:protein phosphorylation; C:integral component of membrane; P:recognition of pollen; F:protein serine kinase activity	EC:2.7.1; EC:2.7.12.1; EC:2.7; EC:2	Transferring phosphorus-containing groups; Dual-specificity kinase; Transferring phosphorus-containing groups; Transferases	-	-	-	-	-
HORVU.MOREX.r3.5HG0450460.1	0	0	19.1536	40.107	14.8152	0	29.6303	Inf	Inf	0.000955228	0.0174147	hypothetical protein ZWY2020_004145	705	20	1.33E-148	95.32	-	-	-	-	-	-	-	-	-	-
HORVU.MOREX.r3.6HG0617180.1	4.80706	1.02988	90.022	229.412	81.3177	2.91847	159.717	54.7262	5.77416	2.46E-07	2.07E-05	serine/threonine-protein phosphatase 7 long form homolog	1068	20	0	81.19	-	-	-	-	-	-	-	-	-	-
HORVU.MOREX.r3.1HG0090200.1	1.80265	0	33.5188	9.62568	11.2368	0.901324	21.5723	23.934	4.58099	0.0205113	0.160808	disease resistance protein RGA5-like	2823	20	0	84.24	2	P:GO:0006952; F:GO:0043531	P:defense response; F:ADP binding	-	-	-	-	-	-	-
HORVU.MOREX.r3.2HG0126420.1	0.600883	6.1793	243.251	324.064	143.524	3.39009	283.658	83.6726	6.38668	6.90E-11	3.08E-08	hypothetical protein D1007_00210	726	20	2.12E-161	92	-	-	-	-	-	-	-	-	-	-
HORVU.MOREX.r3.4HG0371450.1	0	0	8.61913	17.6471	6.56655	0	13.1331	Inf	Inf	0.0263629	0.187161	hypothetical protein ZWY2020_021451, partial	774	20	1.33E-153	95.75	-	-	-	-	-	-	-	-	-	-
HORVU.MOREX.r3.6HG0632650.1	3.6053	3.08965	45.011	75.4011	31.7768	3.34747	60.2061	17.9855	4.16876	0.00133066	0.0227296	disease resistance protein Pik-2-like	3006	20	0	85.72	2	P:GO:0006952; F:GO:0043531	P:defense response; F:ADP binding	-	-	-	-	-	-	-
HORVU.MOREX.r3.3HG0225040.1	4.80706	5.14942	130.245	178.075	79.569	4.97824	154.16	30.9667	4.95265	1.01E-06	6.73E-05	16.9 kDa class I heat shock protein 1-like	456	20	1.91E-79	99.64	7	P:GO:0006457; P:GO:0009408; P:GO:0009651; P:GO:0042542; F:GO:0043621; F:GO:0051082; P:GO:0051259	P:protein folding; P:response to heat; P:response to salt stress; P:response to hydrogen peroxide; F:protein self-association; F:unfolded protein binding; P:protein complex oligomerization	-	-	-	-	-	K13993	-
HORVU.MOREX.r3.4HG0342820.1	0	0	13.4075	25.6685	9.769	0	19.538	Inf	Inf	0.00665211	0.075244	hypothetical protein ZWY2020_032988, partial	690	20	4.93E-139	96.17	-	-	-	-	-	-	-	-	-	-
HORVU.MOREX.r3.4HG0395960.1	159.835	238.933	28.7304	16.0428	110.885	199.384	22.3866	0.112279	-3.15484	0.000437065	0.00938765	3-ketoacyl-CoA synthase 6-like	1506	20	0	97.05	3	P:GO:0006633; C:GO:0016021; F:GO:0016747	P:fatty acid biosynthetic process; C:integral component of membrane; F:acyltransferase activity, transferring groups other than amino-acyl groups	EC:2.3; EC:2; EC:2.3.1	Acyltransferases; Transferases; Acyltransferases	-	-	-	K15397	Metabolic pathways; Biosynthesis of secondary metabolites; Plant-pathogen interaction;
HORVU.MOREX.r3.7HG0709030.1	3.00441	3.08965	82.3606	94.6525	45.7768	3.04703	88.5065	29.0468	4.86031	3.25E-05	0.00113839	retrotransposon protein, putative, Ty1-copia subclass	276	20	4.97E-43	96.96	5	F:GO:0003676; F:GO:0003964; P:GO:0006278; F:GO:0008270; P:GO:0015074	F:nucleic acid binding; F:RNA-directed DNA polymerase activity; P:RNA-templated DNA biosynthetic process; F:zinc ion binding; P:DNA integration	EC:2.7; EC:2; EC:2.7.7.49; EC:2.7.7	Transferring phosphorus-containing groups; Transferases; RNA-directed DNA polymerase; Transferring phosphorus-containing groups	-	-	-	-	-
HORVU.MOREX.r3.1HG0050140.1	9.01324	10.2988	49.7994	56.1498	31.3153	9.65604	52.9746	5.48616	2.4558	0.0333142	0.213533	21 kDa protein-like	633	20	1.42E-80	83.14	2	F:GO:0004857; P:GO:0043086	F:enzyme inhibitor activity; P:negative regulation of catalytic activity	-	-	-	-	-	-	-
HORVU.MOREX.r3.2HG0189150.1	0	0	11.4922	11.23	5.68053	0	11.3611	Inf	Inf	0.0331197	0.212742	probable trehalose-phosphate phosphatase 5	1104	20	0	90.45	3	F:GO:0004805; P:GO:0005992; P:GO:0016311	F:trehalose-phosphatase activity; P:trehalose biosynthetic process; P:dephosphorylation	EC:3.1; EC:3.1.3.12; EC:3; EC:3.1.3	Acting on ester bonds; Trehalose-phosphatase; Hydrolases; Acting on ester bonds	-	-	-	K01087	Metabolic pathways; Biosynthesis of secondary metabolites; Starch and sucrose metabolism;
HORVU.MOREX.r3.1HG0076990.1	0	0	27.7728	41.7113	17.371	0	34.742	Inf	Inf	0.000308993	0.00707386	Lactation elevated protein 1	465	20	7.56E-68	87.75	-	-	-	-	-	-	-	-	-	-
HORVU.MOREX.r3.6HG0558880.1	76.913	92.6895	11.4922	9.62568	47.6801	84.8012	10.5589	0.124514	-3.00562	0.00455715	0.0574733	histone H2A-like	468	20	1.69E-48	98.06	4	C:GO:0000786; F:GO:0003677; C:GO:0005634; F:GO:0046982	C:nucleosome; F:DNA binding; C:nucleus; F:protein heterodimerization activity	-	-	-	-	-	K11251	Necroptosis;
HORVU.MOREX.r3.1HG0080760.1	219.322	356.34	21.069	25.6685	155.6	287.831	23.3687	0.0811891	-3.62257	2.09E-05	0.000788891	Histone H3.2	411	20	2.95E-92	100	4	C:GO:0000786; F:GO:0003677; C:GO:0005634; F:GO:0046982	C:nucleosome; F:DNA binding; C:nucleus; F:protein heterodimerization activity	-	-	-	-	-	K11253	-
HORVU.MOREX.r3.1HG0076370.1	0.600883	2.05977	17.2383	70.5883	22.6218	1.33032	43.9133	33.0094	5.04481	0.00151713	0.0251705	predicted protein	654	20	1.45E-140	73.32	3	F:GO:0003676; F:GO:0008408; P:GO:0090305	F:nucleic acid binding; F:3'-5' exonuclease activity; P:nucleic acid phosphodiester bond hydrolysis	EC:3.1; EC:3	Acting on ester bonds; Hydrolases	-	-	-	-	-
HORVU.MOREX.r3.1HG0083930.1	0	0	11.4922	11.23	5.68053	0	11.3611	Inf	Inf	0.0331197	0.212742	ubiquitin C-terminal hydrolase 12-like isoform X2	954	20	0	85.58	-	-	-	-	-	-	-	-	-	-
HORVU.MOREX.r3.5HG0510550.1	4.80706	12.3586	41.1803	52.9412	27.8218	8.58283	47.0608	5.48313	2.455	0.0346736	0.218499	beta-glucosidase BoGH3B-like	1929	20	0	95.53	3	C:GO:0005576; F:GO:0008422; P:GO:0009251	C:extracellular region; F:beta-glucosidase activity; P:glucan catabolic process	EC:3.2; EC:3.2.1.21; EC:3; EC:3.2.1	Glycosylases; Beta-glucosidase; Hydrolases; Glycosylases	-	-	-	K05349	Metabolic pathways; Biosynthesis of secondary metabolites; Starch and sucrose metabolism; Cyanoamino acid metabolism; Biosynthesis of various plant secondary metabolites;
HORVU.MOREX.r3.2HG0139140.1	2.40353	0	26.8151	70.5883	24.9517	1.20177	48.7017	40.5251	5.34075	0.00109288	0.0193922	cbl-interacting protein kinase 13	708	20	6.36E-152	91.35	-	-	-	-	-	-	-	-	-	-
HORVU.MOREX.r3.6HG0543110.1	1326.15	1323.4	14428.4	18364.2	8860.54	1324.77	16396.3	12.3767	3.62955	0.00811209	0.0867964	pre-mRNA-processing protein 40A isoform X1	2967	20	0	97.25	2	C:GO:0005634; P:GO:0045292	C:nucleus; P:mRNA cis splicing, via spliceosome	-	-	-	-	-	K12821	Spliceosome;
HORVU.MOREX.r3.2HG0097520.1	1.20177	4.11953	34.4765	32.0856	17.9709	2.66065	33.2811	12.5086	3.64485	0.0130804	0.120991	probable carboxylesterase 5	1257	20	0	81.9	1	F:GO:0016787	F:hydrolase activity	EC:3	Hydrolases	-	-	-	-	-
HORVU.MOREX.r3.6HG0596650.1	20.43	24.7172	711.557	1124.6	470.326	22.5736	918.079	40.6704	5.34591	6.30E-09	1.00E-06	hypothetical protein ZWY2020_039935	585	20	1.06E-66	81.85	-	-	-	-	-	-	-	-	-	-
HORVU.MOREX.r3.2HG0216720.1	7.21059	2.05977	34.4765	46.5241	22.5677	4.63518	40.5003	8.7376	3.12724	0.0321725	0.209525	probable LRR receptor-like serine/threonine-protein kinase At3g47570	3402	20	0	84.01	4	F:GO:0004672; F:GO:0005524; P:GO:0006468; C:GO:0016021	F:protein kinase activity; F:ATP binding; P:protein phosphorylation; C:integral component of membrane	EC:2.7.1; EC:2.7; EC:2	Transferring phosphorus-containing groups; Transferring phosphorus-containing groups; Transferases	-	-	-	-	-
HORVU.MOREX.r3.5HG0428370.1	0.600883	0	8.61913	24.0642	8.32105	0.300441	16.3417	54.3922	5.76533	0.0354954	0.221448	BTB/POZ and MATH domain-containing protein 2-like	1254	20	0	89.43	2	P:GO:0009628; P:GO:0016567	P:response to abiotic stimulus; P:protein ubiquitination	-	-	-	-	-	K10523	-
HORVU.MOREX.r3.1HG0079610.1	0	4.11953	78.5299	117.112	49.9405	2.05977	97.8211	47.4914	5.56959	1.59E-06	9.50E-05	Alternative oxidase 1a, mitochondrial	1890	20	0	90.43	-	-	-	-	-	-	-	-	-	-
HORVU.MOREX.r3.2HG0123530.1	12.0177	4.11953	54.5878	62.5669	33.323	8.06859	58.5774	7.25992	2.85995	0.0190788	0.153794	---NA---	453	-	-	-	-	-	-	-	-	-	-	-	-	-
HORVU.MOREX.r3.7HG0732240.1	0	0	11.4922	16.0428	6.88374	0	13.7675	Inf	Inf	0.0208115	0.162143	---NA---	540	-	-	-	-	-	-	-	-	-	-	-	-	-
HORVU.MOREX.r3.2HG0124740.1	0	0	13.4075	33.6899	11.7744	0	23.5487	Inf	Inf	0.00323367	0.0447506	mutator protein	759	20	0	96.41	-	-	-	-	-	-	-	-	-	-
HORVU.MOREX.r3.2HG0125400.1	4.80706	14.4184	492.248	858.29	342.441	9.61272	675.269	70.2475	6.13437	5.70E-11	2.78E-08	transposase family protein	429	20	2.99E-95	90.72	2	F:GO:0003676; P:GO:0015074	F:nucleic acid binding; P:DNA integration	-	-	-	-	-	-	-
HORVU.MOREX.r3.6HG0584780.1	0.600883	4.11953	19.1536	36.8984	15.1931	2.36021	28.026	11.8744	3.56978	0.0270748	0.190075	mutator protein	786	20	0	99.25	-	-	-	-	-	-	-	-	-	-
HORVU.MOREX.r3.7HG0709120.1	3.00441	4.11953	37.3496	46.5241	22.7494	3.56197	41.9368	11.7735	3.55747	0.010155	0.10132	uncharacterized protein LOC123410132	2256	20	0	82.18	-	-	-	-	-	-	-	-	-	-
HORVU.MOREX.r3.7HG0687040.1	0	2.05977	26.8151	60.9626	22.4594	1.02988	43.8889	42.6154	5.4133	0.000600065	0.0120543	lrr receptor-like serine threonine-protein kinase	570	20	6.75E-133	64.38	1	P:GO:0031047	P:gene silencing by RNA	-	-	-	-	-	-	-
HORVU.MOREX.r3.2HG0145080.1	2.40353	2.05977	55.5455	89.8397	37.4621	2.23165	72.6926	32.5735	5.02563	9.86E-05	0.00286265	protein MAIN-LIKE 1-like isoform X2	780	20	1.52E-162	85.52	-	-	-	-	-	-	-	-	-	-
HORVU.MOREX.r3.2HG0212400.1	12.0177	17.508	176.213	253.476	114.804	14.7628	214.845	14.5531	3.86325	1.30E-05	0.000534994	Ycf2 protein	534	20	2.25E-122	97.49	3	F:GO:0000166; C:GO:0009507; C:GO:0016021	F:nucleotide binding; C:chloroplast; C:integral component of membrane	-	-	-	-	-	-	-
HORVU.MOREX.r3.6HG0606330.1	0	0	6.70377	32.0856	9.69734	0	19.3947	Inf	Inf	0.00868477	0.0909792	L10-interacting MYB domain-containing protein-like	885	20	0	74.17	-	-	-	-	-	-	-	-	-	-
HORVU.MOREX.r3.1HG0081440.1	0	0	11.4922	16.0428	6.88374	0	13.7675	Inf	Inf	0.0208115	0.162143	hypothetical protein ZWY2020_031979	537	20	2.23E-110	83.83	2	C:GO:0016020; F:GO:0046872	C:membrane; F:metal ion binding	-	-	-	-	-	-	-
HORVU.MOREX.r3.2HG0105560.1	159.234	168.901	18.1959	4.81284	87.7859	164.067	11.5044	0.0701199	-3.83403	7.78E-05	0.00235189	proline-rich protein 4-like	636	20	4.80E-82	96.44	-	-	-	-	-	-	-	-	-	-
HORVU.MOREX.r3.6HG0605920.1	13.2194	6.1793	78.5299	35.2942	33.3057	9.69936	56.912	5.86761	2.55277	0.020453	0.160559	ubiquitin family protein	453	20	1.45E-94	94.1	4	F:GO:0003729; C:GO:0005634; C:GO:0005737; C:GO:0005840	F:mRNA binding; C:nucleus; C:cytoplasm; C:ribosome	-	-	-	-	-	K08770	Ubiquitin mediated proteolysis; PPAR signaling pathway;
HORVU.MOREX.r3.2HG0098150.1	0	0	35.4342	62.5669	24.5003	0	49.0006	Inf	Inf	2.13E-05	0.000798813	probable WRKY transcription factor 70	756	20	8.64E-162	89.1	5	F:GO:0003700; C:GO:0005634; P:GO:0006355; F:GO:0043565; P:GO:0050896	F:DNA-binding transcription factor activity; C:nucleus; P:regulation of DNA-templated transcription; F:sequence-specific DNA binding; P:response to stimulus	-	-	-	-	-	-	-
HORVU.MOREX.r3.2HG0108570.1	23.4344	20.5977	162.806	234.225	110.266	22.016	198.515	9.01685	3.17262	0.000331183	0.00747251	protein VASP homolog	1011	20	9.67E-128	71.97	1	C:GO:0016021	C:integral component of membrane	-	-	-	-	-	-	-
HORVU.MOREX.r3.7HG0748190.1	14.4212	23.6873	107.26	150.802	74.0428	19.0543	129.031	6.77179	2.75954	0.00220226	0.0336113	disease resistance protein Pik-2-like	3657	20	0	83.51	2	P:GO:0006952; F:GO:0043531	P:defense response; F:ADP binding	-	-	-	-	-	-	-
HORVU.MOREX.r3.1HG0023970.1	84.1236	83.4206	1747.77	2400	1078.83	83.7721	2073.89	24.7563	4.62972	1.56E-06	9.39E-05	GATA transcription factor 23-like	468	20	3.58E-49	88.3	4	P:GO:0006355; F:GO:0008270; P:GO:0030154; F:GO:0043565	P:regulation of DNA-templated transcription; F:zinc ion binding; P:cell differentiation; F:sequence-specific DNA binding	-	-	-	-	-	-	-
HORVU.MOREX.r3.7HG0750880.1	23.4344	43.2551	614.831	757.22	359.685	33.3448	686.026	20.5737	4.36273	2.67E-07	2.22E-05	disease resistance protein RGA5-like	2214	20	0	81.88	2	P:GO:0006952; F:GO:0043531	P:defense response; F:ADP binding	-	-	-	-	-	-	-
HORVU.MOREX.r3.2HG0203840.1	125.584	86.5102	13.4075	36.8984	65.6002	106.047	25.153	0.237186	-2.07591	0.0116639	0.111914	endonuclease 4-like	882	20	0	93.41	6	F:GO:0000014; F:GO:0003676; F:GO:0004521; P:GO:0006308; F:GO:0046872; P:GO:0090502	F:single-stranded DNA endodeoxyribonuclease activity; F:nucleic acid binding; F:endoribonuclease activity; P:DNA catabolic process; F:metal ion binding; P:RNA phosphodiester bond hydrolysis, endonucleolytic	EC:3.1; EC:3	Acting on ester bonds; Hydrolases	-	-	-	-	-
HORVU.MOREX.r3.7HG0696580.1	0	0	8.61913	11.23	4.96227	0	9.92454	Inf	Inf	0.0491191	0.265387	putative transposase	291	20	2.05E-54	87.12	1	F:GO:0003676	F:nucleic acid binding	-	-	-	-	-	-	-
HORVU.MOREX.r3.2HG0106950.1	1.20177	0	58.4186	83.4225	35.7607	0.600883	70.9206	118.027	6.88298	7.75E-06	0.000349821	predicted protein	771	20	8.04E-149	72.88	3	F:GO:0003676; F:GO:0008408; P:GO:0090305	F:nucleic acid binding; F:3'-5' exonuclease activity; P:nucleic acid phosphodiester bond hydrolysis	EC:3.1; EC:3	Acting on ester bonds; Hydrolases	-	-	-	-	-
HORVU.MOREX.r3.4HG0384600.1	407.999	356.34	65.1223	88.2354	229.424	382.169	76.6789	0.200641	-2.31731	0.00227583	0.0344212	ran-binding protein 1 homolog a-like	831	20	1.54E-102	95.42	7	F:GO:0005096; C:GO:0005643; C:GO:0005737; P:GO:0006913; P:GO:0015031; P:GO:0050790; P:GO:0051028	F:GTPase activator activity; C:nuclear pore; C:cytoplasm; P:nucleocytoplasmic transport; P:protein transport; P:regulation of catalytic activity; P:mRNA transport	-	-	-	-	-	K15306	-
HORVU.MOREX.r3.7HG0635710.1	0	0	21.069	20.8556	10.4812	0	20.9623	Inf	Inf	0.00397811	0.0519506	protein NPG1-like	2019	20	0	94.85	1	C:GO:0043231	C:intracellular membrane-bounded organelle	-	-	-	-	-	-	-
HORVU.MOREX.r3.7HG0730070.1	36.053	43.2551	5.74609	0	21.2635	39.654	2.87304	0.0724528	-3.78682	0.0180183	0.147835	thaumatin-like protein	747	20	2.49E-158	92.3	2	P:GO:0006952; C:GO:0016021	P:defense response; C:integral component of membrane	-	-	-	-	-	-	-
HORVU.MOREX.r3.4HG0372800.1	1.20177	1.02988	40.2226	56.1498	24.651	1.11582	48.1862	43.1844	5.43244	0.000465764	0.00987413	predicted protein	669	20	4.51E-153	90.33	1	P:GO:0032196	P:transposition	-	-	-	-	-	-	-
HORVU.MOREX.r3.2HG0214180.1	0	3.08965	21.069	30.4813	13.66	1.54483	25.7752	16.6848	4.06047	0.0165431	0.140945	putative receptor-like protein kinase At4g00960	807	20	0	82.87	3	F:GO:0004674; F:GO:0005524; P:GO:0006468	F:protein serine/threonine kinase activity; F:ATP binding; P:protein phosphorylation	EC:2.7.1; EC:2.7; EC:2	Transferring phosphorus-containing groups; Transferring phosphorus-containing groups; Transferases	-	-	-	K14508	Plant hormone signal transduction;
HORVU.MOREX.r3.2HG0120560.1	2.40353	2.05977	48.8417	35.2942	22.1498	2.23165	42.0679	18.8506	4.23654	0.00328191	0.0452216	peroxidase 2-like	1371	20	0	95.28	7	F:GO:0004601; C:GO:0005576; P:GO:0006979; F:GO:0020037; P:GO:0042744; F:GO:0046872; P:GO:0098869	F:peroxidase activity; C:extracellular region; P:response to oxidative stress; F:heme binding; P:hydrogen peroxide catabolic process; F:metal ion binding; P:cellular oxidant detoxification	EC:1.11; EC:1; EC:1.11.1	Acting on a peroxide as acceptor; Oxidoreductases; Acting on a peroxide as acceptor	-	-	-	K00430	Metabolic pathways; Biosynthesis of secondary metabolites; Phenylpropanoid biosynthesis;
HORVU.MOREX.r3.6HG0633270.1	0	0	13.4075	22.4599	8.96686	0	17.9337	Inf	Inf	0.00894512	0.0926724	hypothetical protein ZWY2020_023902	612	14	6.41E-73	75.38	-	-	-	-	-	-	-	-	-	-
HORVU.MOREX.r3.2HG0138920.1	1090.6	642.647	7251.56	6667.39	3913.05	866.625	6959.47	8.03055	3.0055	0.00693412	0.0774596	hypothetical protein CFC21_006776	372	20	5.40E-85	98.41	-	-	-	-	-	-	-	-	-	-
HORVU.MOREX.r3.1HG0080810.1	1.20177	0	16.2806	24.0642	10.3866	0.600883	20.1724	33.5713	5.06916	0.0266629	0.188594	Elongation factor 1-alpha	792	20	5.39E-146	75.03	-	-	-	-	-	-	-	-	-	-
HORVU.MOREX.r3.7HG0688400.1	10.8159	10.2988	135.991	158.824	78.9823	10.5574	147.407	13.9625	3.80349	5.78E-05	0.0018454	mutator protein	2037	20	0	93.84	-	-	-	-	-	-	-	-	-	-
HORVU.MOREX.r3.4HG0333790.1	0	0	7.66145	12.8342	5.12392	0	10.2478	Inf	Inf	0.0481216	0.26223	Cohesin subunit SA-1	519	20	6.83E-122	85.02	2	F:GO:0003677; C:GO:0005634	F:DNA binding; C:nucleus	-	-	-	-	-	-	-
HORVU.MOREX.r3.5HG0466850.1	22.8335	19.5678	312.204	373.797	182.101	21.2007	343.001	16.1788	4.01603	3.21E-06	0.000167355	WRKY transcription factor 44-like	777	20	1.58E-153	84.19	3	P:GO:0006508; F:GO:0008234; F:GO:0019784	P:proteolysis; F:cysteine-type peptidase activity; F:deNEDDylase activity	EC:3.4; EC:3	Acting on peptide bonds (peptidases); Hydrolases	-	-	-	-	-
HORVU.MOREX.r3.5HG0524400.1	1.20177	6.1793	23.942	43.3156	18.6597	3.69053	33.6288	9.11218	3.1878	0.02709	0.19009	protein transport protein SEC31-like	1521	20	0	64.63	3	F:GO:0003677; C:GO:0005634; P:GO:0006355	F:DNA binding; C:nucleus; P:regulation of DNA-templated transcription	-	-	-	-	-	-	-
HORVU.MOREX.r3.3HG0229360.1	0	0	9.57681	24.0642	8.41025	0	16.8205	Inf	Inf	0.0126283	0.117796	hypothetical protein D1007_28816	1251	20	0	76.74	-	-	-	-	-	-	-	-	-	-
HORVU.MOREX.r3.4HG0382310.1	1.80265	0	74.6991	99.4653	43.9918	0.901324	87.0822	96.6159	6.59419	2.33E-06	0.000130442	predicted protein	684	20	5.96E-138	92.62	1	P:GO:0032196	P:transposition	-	-	-	-	-	-	-
HORVU.MOREX.r3.7HG0730450.1	2.40353	0	15.3229	36.8984	13.6562	1.20177	26.1107	21.7269	4.44141	0.0283698	0.194901	Jasmonate O-methyltransferase	327	8	1.38E-57	79.13	-	-	-	-	-	-	-	-	-	-
HORVU.MOREX.r3.1HG0000530.1	0	0	12.4499	19.2514	7.9253	0	15.8506	Inf	Inf	0.0135815	0.124007	F-box/LRR-repeat protein 14-like	750	20	2.78E-149	88.86	-	-	-	-	-	-	-	-	-	-
HORVU.MOREX.r3.1HG0023810.1	4.20618	0	28.7304	78.6097	27.8866	2.10309	53.6701	25.5196	4.67354	0.00203425	0.0316913	cbl-interacting protein kinase 13	450	20	1.16E-84	91.92	-	-	-	-	-	-	-	-	-	-
HORVU.MOREX.r3.5HG0429980.1	0	0	13.4075	16.0428	7.36258	0	14.7252	Inf	Inf	0.0161494	0.138775	programmed cell death protein 2-like isoform X3	1269	20	0	76.14	2	C:GO:0005737; F:GO:0046872	C:cytoplasm; F:metal ion binding	-	-	-	-	-	-	-
HORVU.MOREX.r3.5HG0495750.1	0	0	23.942	16.0428	9.99621	0	19.9924	Inf	Inf	0.00432157	0.0553199	predicted protein	1035	20	0	74.5	2	F:GO:0003677; C:GO:0005634	F:DNA binding; C:nucleus	-	-	-	-	-	-	-
HORVU.MOREX.r3.7HG0717720.1	956.004	874.371	209.732	181.284	555.348	915.188	195.508	0.213626	-2.22684	0.00566834	0.0670927	T-complex protein 1 subunit epsilon	1608	20	0	97.84	5	F:GO:0005524; C:GO:0005832; P:GO:0006457; F:GO:0016887; F:GO:0051082	F:ATP binding; C:chaperonin-containing T-complex; P:protein folding; F:ATP hydrolysis activity; F:unfolded protein binding	EC:3.6.1; EC:3.6; EC:3; EC:3.6.1.15	Acting on acid anhydrides; Acting on acid anhydrides; Hydrolases; Nucleoside-triphosphate phosphatase	-	-	-	-	-
HORVU.MOREX.r3.4HG0394980.1	289.625	364.579	64.1646	75.4011	198.442	327.102	69.7829	0.213337	-2.2288	0.00438167	0.0558986	allene oxide synthase 2-like	1464	20	0	95.81	5	F:GO:0004497; F:GO:0005506; P:GO:0016125; F:GO:0016705; F:GO:0020037	F:monooxygenase activity; F:iron ion binding; P:sterol metabolic process; F:oxidoreductase activity, acting on paired donors, with incorporation or reduction of molecular oxygen; F:heme binding	EC:1; EC:1.14	Oxidoreductases; Acting on paired donors, with incorporation or reduction of molecular oxygen. The oxygen incorporated need not be derived from O(2)	-	-	-	K01723	Metabolic pathways; Biosynthesis of secondary metabolites;
HORVU.MOREX.r3.5HG0468680.1	22.2327	24.7172	2159.57	3588.77	1448.82	23.4749	2874.17	122.436	6.93588	5.72E-10	1.52E-07	transposase family protein	966	20	0	86.87	2	F:GO:0003676; P:GO:0015074	F:nucleic acid binding; P:DNA integration	-	-	-	-	-	-	-
HORVU.MOREX.r3.1HG0088930.1	0	0	21.069	28.877	12.4865	0	24.973	Inf	Inf	0.00197899	0.0309976	CTD small phosphatase-like protein 2	1158	20	0	80.07	2	P:GO:0016311; F:GO:0016791	P:dephosphorylation; F:phosphatase activity	-	-	-	-	-	-	-
HORVU.MOREX.r3.1HG0064180.1	6.00883	2.05977	59.3762	104.278	42.9308	4.0343	81.8272	20.2829	4.34219	0.000362626	0.00805132	CSC1-like protein At4g02900	2304	20	0	96.07	4	F:GO:0005227; C:GO:0005886; C:GO:0016021; P:GO:0098655	F:calcium activated cation channel activity; C:plasma membrane; C:integral component of membrane; P:cation transmembrane transport	EC:7	n/a	-	-	-	-	-
HORVU.MOREX.r3.7HG0708870.1	1.20177	6.1793	15.3229	48.1284	17.7081	3.69053	31.7256	8.59649	3.10375	0.0417367	0.243187	pentatricopeptide repeat-containing protein At1g08070, chloroplastic-like	1914	20	0	90.66	1	F:GO:0008270	F:zinc ion binding	-	-	-	-	-	-	-
HORVU.MOREX.r3.6HG0630570.1	0	0	16.2806	17.6471	8.48191	0	16.9638	Inf	Inf	0.00966108	0.0978223	Alpha-amylase	552	20	2.76E-107	86.43	3	F:GO:0003676; F:GO:0004523; P:GO:0090502	F:nucleic acid binding; F:RNA-DNA hybrid ribonuclease activity; P:RNA phosphodiester bond hydrolysis, endonucleolytic	EC:3.1.30; EC:3.1; EC:3; EC:3.1.26; EC:3.1.26.4	Acting on ester bonds; Acting on ester bonds; Hydrolases; Acting on ester bonds; Ribonuclease H	-	-	-	-	-
HORVU.MOREX.r3.1HG0017790.1	0	0	9.57681	17.6471	6.80597	0	13.6119	Inf	Inf	0.0231102	0.173016	predicted protein	1242	20	0	76.23	-	-	-	-	-	-	-	-	-	-
HORVU.MOREX.r3.2HG0115220.1	6.00883	8.23907	46.9264	38.5027	24.9192	7.12395	42.7145	5.99591	2.58398	0.0339783	0.215546	uncharacterized protein LOC119282530	456	20	7.56E-76	83.42	-	-	-	-	-	-	-	-	-	-
HORVU.MOREX.r3.4HG0406800.1	3.6053	0	34.4765	68.984	26.7665	1.80265	51.7303	28.6968	4.84282	0.00152004	0.0252076	predicted protein	756	20	1.89E-135	73.45	3	F:GO:0003676; F:GO:0008408; P:GO:0090305	F:nucleic acid binding; F:3'-5' exonuclease activity; P:nucleic acid phosphodiester bond hydrolysis	EC:3.1; EC:3	Acting on ester bonds; Hydrolases	-	-	-	-	-
HORVU.MOREX.r3.4HG0358420.1	2.40353	0	44.0533	68.984	28.8602	1.20177	56.5187	47.0297	5.5555	0.000267292	0.00628102	predicted protein	774	20	4.77E-151	85.04	1	P:GO:0032196	P:transposition	-	-	-	-	-	-	-
HORVU.MOREX.r3.1HG0062900.1	0	0	9.57681	12.8342	5.60276	0	11.2055	Inf	Inf	0.0369057	0.226003	pyrophosphate-energized vacuolar membrane proton pump-like	2328	20	0	95.46	4	F:GO:0004427; F:GO:0009678; C:GO:0016021; P:GO:1902600	F:inorganic diphosphate phosphatase activity; F:pyrophosphate hydrolysis-driven proton transmembrane transporter activity; C:integral component of membrane; P:proton transmembrane transport	EC:7.1.3.1; EC:3.6.1.1; EC:3.6.1; EC:3.6; EC:3; EC:7	n/a; Inorganic diphosphatase; Acting on acid anhydrides; Acting on acid anhydrides; Hydrolases; n/a	-	-	-	-	-
HORVU.MOREX.r3.3HG0292990.1	1.20177	2.05977	19.1536	32.0856	13.6252	1.63077	25.6196	15.7102	3.97363	0.0265254	0.187905	cysteine-rich repeat secretory protein 38-like isoform X2	996	20	5.48E-119	92.42	1	C:GO:0016021	C:integral component of membrane	-	-	-	-	-	-	-
HORVU.MOREX.r3.4HG0348780.1	0	0	11.4922	22.4599	8.48802	0	16.976	Inf	Inf	0.0114328	0.110181	putative CBL-interacting protein kinase 13	774	20	4.95E-127	90.51	-	-	-	-	-	-	-	-	-	-
HORVU.MOREX.r3.3HG0285620.1	0	0	16.2806	25.6685	10.4873	0	20.9745	Inf	Inf	0.00464185	0.0582676	ATP-dependent DNA helicase PIF1-like	780	20	1.98E-158	91.86	7	P:GO:0000723; F:GO:0003678; F:GO:0005524; P:GO:0006281; P:GO:0006310; F:GO:0016887; P:GO:0032508	P:telomere maintenance; F:DNA helicase activity; F:ATP binding; P:DNA repair; P:DNA recombination; F:ATP hydrolysis activity; P:DNA duplex unwinding	EC:3.6.1; EC:3.6; EC:3; EC:3.6.1.15	Acting on acid anhydrides; Acting on acid anhydrides; Hydrolases; Nucleoside-triphosphate phosphatase	-	-	-	-	-
HORVU.MOREX.r3.5HG0511200.1	7.81147	4.11953	35.4342	59.3583	26.6809	5.9655	47.3963	7.94506	2.99006	0.0267595	0.189097	putative transposase	825	20	0	84.11	1	F:GO:0003676	F:nucleic acid binding	-	-	-	-	-	-	-
HORVU.MOREX.r3.2HG0170050.1	0	0	11.4922	9.62568	5.27946	0	10.5589	Inf	Inf	0.038517	0.23209	septin and tuftelin-interacting protein 1 homolog 1-like	1104	20	0	87.83	3	P:GO:0000390; F:GO:0003676; C:GO:0071008	P:spliceosomal complex disassembly; F:nucleic acid binding; C:U2-type post-mRNA release spliceosomal complex	-	-	-	-	-	-	-
HORVU.MOREX.r3.1HG0025200.1	1.20177	0	16.2806	17.6471	8.78236	0.600883	16.9638	28.2315	4.81924	0.0426411	0.24581	putative F-box/FBD/LRR-repeat protein At3g49030	663	20	9.59E-147	90.96	-	-	-	-	-	-	-	-	-	-
HORVU.MOREX.r3.2HG0158640.1	1.20177	2.05977	33.5188	64.1712	25.2379	1.63077	48.845	29.9522	4.90459	0.000883668	0.0163488	hypothetical protein ZWY2020_009761	603	20	1.63E-63	81.84	-	-	-	-	-	-	-	-	-	-
HORVU.MOREX.r3.7HG0650380.1	0	0	19.1536	9.62568	7.19483	0	14.3897	Inf	Inf	0.0139723	0.126125	PHD finger protein ALFIN-LIKE 3-like	942	20	0	83.39	-	-	-	-	-	-	-	-	-	-
HORVU.MOREX.r3.5HG0482120.1	0	2.05977	16.2806	25.6685	11.0022	1.02988	20.9745	20.3659	4.34809	0.023215	0.173592	mannose/glucose-specific lectin-like	957	20	0	68.44	1	F:GO:0000166	F:nucleotide binding	-	-	-	-	-	-	-
HORVU.MOREX.r3.3HG0232140.1	3.6053	0	21.069	30.4813	13.7889	1.80265	25.7752	14.2985	3.83779	0.0445335	0.251951	protein ACCELERATED CELL DEATH 6-like	2187	20	0	75.75	1	C:GO:0016020	C:membrane	-	-	-	-	-	-	-
HORVU.MOREX.r3.3HG0294040.1	1.20177	3.08965	30.6458	57.7541	23.1728	2.14571	44.1999	20.5992	4.36452	0.00269061	0.0392612	receptor-like serine/threonine-protein kinase SD1-8	2715	20	0	89.26	8	F:GO:0004674; F:GO:0004712; F:GO:0005524; C:GO:0005886; P:GO:0006468; C:GO:0016021; P:GO:0048544; F:GO:0106310	F:protein serine/threonine kinase activity; F:protein serine/threonine/tyrosine kinase activity; F:ATP binding; C:plasma membrane; P:protein phosphorylation; C:integral component of membrane; P:recognition of pollen; F:protein serine kinase activity	EC:2.7.1; EC:2.7.12.1; EC:2.7; EC:2	Transferring phosphorus-containing groups; Dual-specificity kinase; Transferring phosphorus-containing groups; Transferases	-	-	-	-	-
HORVU.MOREX.r3.6HG0617140.1	1.20177	0	35.4342	44.9198	20.389	0.600883	40.177	66.8633	6.06314	0.000859567	0.0159686	anthocyanidin 5-O-glucoside-6''-O-malonyltransferase-like	636	20	7.08E-135	83.72	-	-	-	-	-	-	-	-	-	-
HORVU.MOREX.r3.5HG0521870.1	0	0	15.3229	3.20856	4.63287	0	9.26573	Inf	Inf	0.0421185	0.243846	ZmEBE-1 protein	909	20	0	73.21	-	-	-	-	-	-	-	-	-	-
HORVU.MOREX.r3.2HG0126820.1	0	0	13.4075	9.62568	5.7583	0	11.5166	Inf	Inf	0.0297945	0.20015	fasciclin-like arabinogalactan protein 2	762	20	7.80E-94	79.86	2	C:GO:0016021; C:GO:0046658	C:integral component of membrane; C:anchored component of plasma membrane	-	-	-	-	-	-	-
HORVU.MOREX.r3.1HG0068480.1	61.8909	123.586	2.87304	6.41712	48.6918	92.7385	4.64508	0.050088	-4.31939	0.000114396	0.00323905	high molecular mass early light-inducible protein HV58, chloroplastic-like	582	20	4.38E-94	91.46	2	C:GO:0009535; C:GO:0016021	C:chloroplast thylakoid membrane; C:integral component of membrane	-	-	-	-	-	-	-
HORVU.MOREX.r3.7HG0694990.1	12.6185	7.20919	939.485	1796.79	689.027	9.91386	1368.14	138.003	7.10855	1.14E-11	1.02E-08	transposase family protein	648	20	6.04E-127	85.13	2	F:GO:0003676; P:GO:0015074	F:nucleic acid binding; P:DNA integration	-	-	-	-	-	-	-
HORVU.MOREX.r3.4HG0333120.1	36.053	30.8965	130.245	239.038	109.058	33.4747	184.641	5.51584	2.46358	0.00568418	0.0672293	inactive protein RESTRICTED TEV MOVEMENT 2-like	942	20	4.92E-97	88.69	2	P:GO:0009408; C:GO:0016021	P:response to heat; C:integral component of membrane	-	-	-	-	-	-	-
HORVU.MOREX.r3.3HG0259020.1	21.0309	19.5678	523.852	887.167	362.904	20.2993	705.509	34.7553	5.11916	1.94E-08	2.45E-06	hypothetical protein ZWY2020_050298	1503	20	0	80.38	-	-	-	-	-	-	-	-	-	-
HORVU.MOREX.r3.5HG0519350.1	0	2.05977	32.5612	17.6471	13.067	1.02988	25.1041	24.3757	4.60737	0.00798568	0.0857616	putative receptor-like protein kinase At4g00960	1458	20	1.38E-124	61.9	1	F:GO:0016301	F:kinase activity	EC:2.7; EC:2	Transferring phosphorus-containing groups; Transferases	-	-	-	-	-
HORVU.MOREX.r3.2HG0168400.1	4.80706	0	91.9374	170.054	66.6995	2.40353	130.996	54.5013	5.76822	9.38E-07	6.31E-05	TPA: orf y	1860	20	0	90	8	F:GO:0003676; F:GO:0003964; F:GO:0004519; P:GO:0006278; P:GO:0006508; F:GO:0008234; F:GO:0008270; P:GO:0090305	F:nucleic acid binding; F:RNA-directed DNA polymerase activity; F:endonuclease activity; P:RNA-templated DNA biosynthetic process; P:proteolysis; F:cysteine-type peptidase activity; F:zinc ion binding; P:nucleic acid phosphodiester bond hydrolysis	EC:3.1; EC:3.4; EC:2.7; EC:2; EC:3; EC:2.7.7.49; EC:2.7.7	Acting on ester bonds; Acting on peptide bonds (peptidases); Transferring phosphorus-containing groups; Transferases; Hydrolases; RNA-directed DNA polymerase; Transferring phosphorus-containing groups	-	-	-	-	-
HORVU.MOREX.r3.1HG0077840.1	255.375	253.351	19.1536	22.4599	137.585	254.363	20.8068	0.0817994	-3.61177	2.18E-05	0.000814694	predicted protein	636	20	1.39E-69	90.06	-	-	-	-	-	-	-	-	-	-
HORVU.MOREX.r3.5HG0497180.1	12.0177	24.7172	195.367	301.605	133.427	18.3674	248.486	13.5286	3.75794	1.17E-05	0.00049269	pentatricopeptide repeat-containing protein At2g36980, mitochondrial-like	1932	20	0	90.4	-	-	-	-	-	-	-	-	-	-
HORVU.MOREX.r3.7HG0711310.1	245.16	333.682	1940.26	1110.16	907.317	289.421	1525.21	5.26987	2.39777	0.00238808	0.0357276	probable aquaporin TIP2-2	747	20	3.81E-161	97.97	5	C:GO:0005774; P:GO:0006833; F:GO:0015250; C:GO:0016021; P:GO:0055085	C:vacuolar membrane; P:water transport; F:water channel activity; C:integral component of membrane; P:transmembrane transport	EC:7	n/a	-	-	-	-	-
HORVU.MOREX.r3.2HG0185800.1	0	0	21.069	27.2728	12.0854	0	24.1709	Inf	Inf	0.00226957	0.0343655	plasmodesmata-located protein 5-like	930	20	2.54E-169	84.99	1	C:GO:0016021	C:integral component of membrane	-	-	-	-	-	-	-
HORVU.MOREX.r3.6HG0618900.1	0	0	15.3229	32.0856	11.8521	0	23.7042	Inf	Inf	0.00295487	0.0420064	ribosomal protein S1	348	20	8.65E-72	89.9	2	C:GO:0005739; C:GO:0005840	C:mitochondrion; C:ribosome	-	-	-	-	-	-	-
HORVU.MOREX.r3.4HG0376670.1	2.40353	7.20919	479.798	784.493	318.476	4.80636	632.146	131.523	7.03917	1.07E-12	2.38E-09	transposase family protein	513	20	3.68E-88	81.61	-	-	-	-	-	-	-	-	-	-
HORVU.MOREX.r3.6HG0610970.1	64.8953	63.8528	258.574	279.145	166.617	64.374	268.859	4.17652	2.0623	0.00928172	0.0954745	zinc finger protein CONSTANS-LIKE 10-like isoform X1	1149	20	0	91.49	2	C:GO:0005634; F:GO:0008270	C:nucleus; F:zinc ion binding	-	-	-	-	-	-	-
HORVU.MOREX.r3.1HG0063080.1	1.20177	2.05977	120.668	208.556	83.1214	1.63077	164.612	100.942	6.65738	4.13E-09	7.09E-07	zinc finger BED domain-containing protein RICESLEEPER 2-like	2022	20	0	81.36	5	F:GO:0003677; C:GO:0005634; P:GO:0009791; F:GO:0046872; F:GO:0046983	F:DNA binding; C:nucleus; P:post-embryonic development; F:metal ion binding; F:protein dimerization activity	-	-	-	-	-	-	-
HORVU.MOREX.r3.5HG0503880.1	2.40353	0	61.2916	70.5883	33.5709	1.20177	65.94	54.8693	5.77793	5.99E-05	0.00190275	SnTox1 sensitivity protein	2175	20	0	80.28	9	F:GO:0004674; F:GO:0005509; F:GO:0005524; C:GO:0005886; P:GO:0006468; P:GO:0007166; C:GO:0016021; F:GO:0030247; F:GO:0038023	F:protein serine/threonine kinase activity; F:calcium ion binding; F:ATP binding; C:plasma membrane; P:protein phosphorylation; P:cell surface receptor signaling pathway; C:integral component of membrane; F:polysaccharide binding; F:signaling receptor activity	EC:2.7.1; EC:2.7; EC:2	Transferring phosphorus-containing groups; Transferring phosphorus-containing groups; Transferases	-	-	-	-	-
HORVU.MOREX.r3.7HG0724090.1	4.80706	2.05977	35.4342	59.3583	25.4148	3.43341	47.3963	13.8044	3.78706	0.00778087	0.084067	uncharacterized protein LOC123409547 isoform X1	2184	20	0	90.4	-	-	-	-	-	-	-	-	-	-
HORVU.MOREX.r3.5HG0469490.1	8.41236	2.05977	72.7838	118.717	50.4931	5.23606	95.7502	18.2867	4.19272	0.000275774	0.00644703	heavy metal-associated isoprenylated plant protein 43-like	501	20	5.01E-71	93.05	1	F:GO:0046872	F:metal ion binding	-	-	-	-	-	-	-
HORVU.MOREX.r3.3HG0229460.1	0	0	18.1959	19.2514	9.36183	0	18.7237	Inf	Inf	0.00656166	0.0744958	RNA exonuclease 4-like	1086	20	0	92.79	4	F:GO:0003676; P:GO:0006364; F:GO:0008408; P:GO:0090305	F:nucleic acid binding; P:rRNA processing; F:3'-5' exonuclease activity; P:nucleic acid phosphodiester bond hydrolysis	EC:3.1; EC:3	Acting on ester bonds; Hydrolases	-	-	-	-	-
HORVU.MOREX.r3.1HG0030750.1	0	0	4.78841	20.8556	6.41101	0	12.822	Inf	Inf	0.0328916	0.211934	hypothetical protein ZWY2020_020772	576	20	9.95E-60	88.88	-	-	-	-	-	-	-	-	-	-
HORVU.MOREX.r3.5HG0458490.1	0	0	44.0533	85.0268	32.27	0	64.5401	Inf	Inf	1.60E-06	9.54E-05	putative calcium-binding protein CML16	708	20	1.39E-143	94.23	-	-	-	-	-	-	-	-	-	-
HORVU.MOREX.r3.3HG0260890.1	0	1.02988	18.1959	35.2942	13.63	0.514942	26.745	51.938	5.69872	0.00484474	0.0601507	predicted protein	693	20	5.28E-132	88.75	1	P:GO:0032196	P:transposition	-	-	-	-	-	-	-
HORVU.MOREX.r3.7HG0696470.1	0	0	8.61913	20.8556	7.36869	0	14.7374	Inf	Inf	0.019336	0.15489	hypothetical protein CFC21_021060	387	20	3.72E-36	73.13	1	C:GO:0016021	C:integral component of membrane	-	-	-	-	-	-	-
HORVU.MOREX.r3.3HG0244040.1	0	0	9.57681	16.0428	6.4049	0	12.8098	Inf	Inf	0.0270218	0.189845	ethylene-responsive transcription factor TINY-like	759	20	9.19E-81	80.18	4	F:GO:0003677; F:GO:0003700; C:GO:0005634; P:GO:0006355	F:DNA binding; F:DNA-binding transcription factor activity; C:nucleus; P:regulation of DNA-templated transcription	-	-	-	-	-	-	-
HORVU.MOREX.r3.3HG0304190.1	1.20177	0	22.9844	14.4385	9.65616	0.600883	18.7114	31.1399	4.96069	0.0267018	0.188774	flavonol synthase/flavanone 3-hydroxylase-like	654	20	8.93E-128	91.8	2	F:GO:0016491; F:GO:0046872	F:oxidoreductase activity; F:metal ion binding	EC:1	Oxidoreductases	-	-	-	-	-
HORVU.MOREX.r3.7HG0715370.1	0	3.08965	22.9844	57.7541	20.957	1.54483	40.3692	26.1319	4.70774	0.0021133	0.0325714	probable LRR receptor-like serine/threonine-protein kinase At3g47570	2553	20	0	90.19	4	F:GO:0004672; F:GO:0005524; P:GO:0006468; C:GO:0016021	F:protein kinase activity; F:ATP binding; P:protein phosphorylation; C:integral component of membrane	EC:2.7.1; EC:2.7; EC:2	Transferring phosphorus-containing groups; Transferring phosphorus-containing groups; Transferases	-	-	-	-	-
HORVU.MOREX.r3.7HG0734140.1	0.600883	4.11953	85.2336	160.428	62.5955	2.36021	122.831	52.0424	5.70161	3.21E-07	2.56E-05	predicted protein	669	20	3.62E-137	89.02	1	P:GO:0032196	P:transposition	-	-	-	-	-	-	-
HORVU.MOREX.r3.5HG0511770.1	2249.7	2080.36	308.373	293.583	1233.01	2165.03	300.978	0.139018	-2.84666	0.00146551	0.0245089	UDP-glucose 6-dehydrogenase 4-like	1443	20	0	98.94	6	F:GO:0003979; C:GO:0005634; C:GO:0005829; P:GO:0006024; P:GO:0006065; F:GO:0051287	F:UDP-glucose 6-dehydrogenase activity; C:nucleus; C:cytosol; P:glycosaminoglycan biosynthetic process; P:UDP-glucuronate biosynthetic process; F:NAD binding	EC:1.1.1.22; EC:1.1; EC:1; EC:1.1.1	UDP-glucose 6-dehydrogenase; Acting on the CH-OH group of donors; Oxidoreductases; Acting on the CH-OH group of donors	-	-	-	K00012	Metabolic pathways; Biosynthesis of nucleotide sugars; Biosynthesis of cofactors; Pentose and glucuronate interconversions; Ascorbate and aldarate metabolism; Amino sugar and nucleotide sugar metabolism; O-Antigen nucleotide sugar biosynthesis;
HORVU.MOREX.r3.5HG0502010.1	0	0	16.2806	19.2514	8.88298	0	17.766	Inf	Inf	0.0083454	0.088636	hypothetical protein ZWY2020_034036	591	20	1.25E-88	94.56	-	-	-	-	-	-	-	-	-	-
HORVU.MOREX.r3.4HG0376680.1	42.6627	61.793	5295.98	8908.57	3577.25	52.2278	7102.27	135.986	7.08732	3.91E-08	4.53E-06	transposase family protein	516	20	4.16E-97	71.81	2	F:GO:0003676; P:GO:0015074	F:nucleic acid binding; P:DNA integration	-	-	-	-	-	-	-
HORVU.MOREX.r3.6HG0555270.1	0	0	12.4499	19.2514	7.9253	0	15.8506	Inf	Inf	0.0135815	0.124007	hypothetical protein ZWY2020_024301	339	20	5.19E-52	85.53	-	-	-	-	-	-	-	-	-	-
HORVU.MOREX.r3.7HG0689940.1	0	1.02988	9.57681	52.9412	15.887	0.514942	31.259	60.704	5.92372	0.00313676	0.0438132	predicted protein	693	20	6.07E-140	86.16	1	P:GO:0032196	P:transposition	-	-	-	-	-	-	-
HORVU.MOREX.r3.5HG0492800.1	0	0	22.9844	35.2942	14.5696	0	29.1393	Inf	Inf	0.00092501	0.0169495	protein transport protein Sec61 subunit alpha-like	1305	20	0	69.25	2	P:GO:0015031; C:GO:0016021	P:protein transport; C:integral component of membrane	-	-	-	-	-	K10956	Protein export;
HORVU.MOREX.r3.7HG0701020.1	10.215	6.1793	47.8841	44.9198	27.2996	8.19715	46.4019	5.66074	2.50099	0.0442805	0.251222	predicted protein	630	20	6.31E-55	83.35	-	-	-	-	-	-	-	-	-	-
HORVU.MOREX.r3.1HG0094180.1	0	0	5.74609	20.8556	6.65043	0	13.3009	Inf	Inf	0.0287088	0.196119	probable protein kinase At2g41970	1095	20	0	98.02	4	F:GO:0004713; F:GO:0005524; C:GO:0005886; P:GO:0018108	F:protein tyrosine kinase activity; F:ATP binding; C:plasma membrane; P:peptidyl-tyrosine phosphorylation	EC:2.7.1; EC:2.7; EC:2	Transferring phosphorus-containing groups; Transferring phosphorus-containing groups; Transferases	-	-	-	-	-
HORVU.MOREX.r3.4HG0417640.1	4.80706	4.11953	19.1536	57.7541	21.4586	4.4633	38.4538	8.61557	3.10695	0.040537	0.238889	serine/threonine-protein phosphatase 7 long form homolog isoform X1	1188	20	0	89.24	-	-	-	-	-	-	-	-	-	-
HORVU.MOREX.r3.7HG0660900.1	2.40353	0	42.138	80.214	31.1889	1.20177	61.176	50.9051	5.66974	0.000160468	0.00427003	putative calcium-binding protein CML16	708	20	6.09E-145	94.86	-	-	-	-	-	-	-	-	-	-
HORVU.MOREX.r3.3HG0291320.1	1.20177	2.05977	57.4609	139.572	50.0737	1.63077	98.5166	60.4112	5.91675	2.30E-06	0.000128883	pentatricopeptide repeat-containing protein At5g56310-like	1461	20	0	92.68	3	F:GO:0003723; P:GO:0009451; C:GO:0043231	F:RNA binding; P:RNA modification; C:intracellular membrane-bounded organelle	-	-	-	-	-	-	-
HORVU.MOREX.r3.2HG0199820.1	1.20177	0	52.6725	56.1498	27.506	0.600883	54.4111	90.552	6.50067	7.14E-05	0.00219808	G-type lectin S-receptor-like serine/threonine-protein kinase B120	1860	20	0	88.33	7	F:GO:0004674; F:GO:0004712; F:GO:0005524; P:GO:0006468; C:GO:0016021; P:GO:0048544; F:GO:0106310	F:protein serine/threonine kinase activity; F:protein serine/threonine/tyrosine kinase activity; F:ATP binding; P:protein phosphorylation; C:integral component of membrane; P:recognition of pollen; F:protein serine kinase activity	EC:2.7.1; EC:2.7.12.1; EC:2.7; EC:2	Transferring phosphorus-containing groups; Dual-specificity kinase; Transferring phosphorus-containing groups; Transferases	-	-	-	-	-
HORVU.MOREX.r3.1HG0016050.1	28.2415	27.8069	524.809	641.712	305.642	28.0242	583.261	20.8128	4.3794	4.02E-07	3.06E-05	hypothetical protein ZWY2020_010667	600	20	9.06E-58	84.31	-	-	-	-	-	-	-	-	-	-
HORVU.MOREX.r3.3HG0218180.1	0	0	38.3073	67.3797	26.4217	0	52.8435	Inf	Inf	1.06E-05	0.000454596	transcription factor bHLH168-like	657	20	1.99E-132	89.75	6	F:GO:0000977; F:GO:0000981; P:GO:0006357; F:GO:0046983; C:GO:0090575; P:GO:2000112	F:RNA polymerase II transcription regulatory region sequence-specific DNA binding; F:DNA-binding transcription factor activity, RNA polymerase II-specific; P:regulation of transcription by RNA polymerase II; F:protein dimerization activity; C:RNA polymerase II transcription regulator complex; P:regulation of cellular macromolecule biosynthetic process	-	-	-	-	-	-	-
HORVU.MOREX.r3.6HG0601790.1	0	0	14.3652	24.0642	9.60735	0	19.2147	Inf	Inf	0.00683029	0.0765731	glycerophosphoryl diester phosphodiesterase 1	390	20	1.24E-76	79.25	4	P:GO:0006071; P:GO:0006629; F:GO:0008081; F:GO:0008889	P:glycerol metabolic process; P:lipid metabolic process; F:phosphoric diester hydrolase activity; F:glycerophosphodiester phosphodiesterase activity	-	-	-	-	-	-	-
HORVU.MOREX.r3.6HG0560240.1	74.5094	52.5241	2180.64	3741.18	1512.21	63.5167	2960.91	46.6162	5.54276	2.47E-07	2.08E-05	putative nuclease HARBI1 isoform X1	480	20	2.27E-94	87.56	4	F:GO:0004518; C:GO:0005634; F:GO:0046872; P:GO:0090305	F:nuclease activity; C:nucleus; F:metal ion binding; P:nucleic acid phosphodiester bond hydrolysis	EC:3.1; EC:3	Acting on ester bonds; Hydrolases	-	-	-	-	-
HORVU.MOREX.r3.1HG0054110.1	41.4609	55.6137	7.66145	4.81284	27.3872	48.5373	6.23714	0.128502	-2.96014	0.0237528	0.175632	patellin-6	1278	20	0	96.68	6	C:GO:0005737; P:GO:0007049; F:GO:0008289; P:GO:0051301; P:GO:0071365; P:GO:1901703	C:cytoplasm; P:cell cycle; F:lipid binding; P:cell division; P:cellular response to auxin stimulus; P:protein localization involved in auxin polar transport	-	-	-	-	-	-	-
HORVU.MOREX.r3.2HG0133280.1	0	0	12.4499	8.0214	5.11781	0	10.2356	Inf	Inf	0.0393414	0.234904	hypothetical protein ZWY2020_004145	705	20	6.60E-143	95.57	-	-	-	-	-	-	-	-	-	-
HORVU.MOREX.r3.7HG0733300.1	1.80265	0	23.942	54.5455	20.0725	0.901324	39.2438	43.5401	5.44427	0.00251333	0.03718	cytochrome P450 76M5-like	354	20	1.43E-73	82.59	-	-	-	-	-	-	-	-	-	-
HORVU.MOREX.r3.2HG0215750.1	21.0309	3.08965	60.3339	99.4653	45.98	12.0603	79.8996	6.62503	2.72793	0.0196338	0.156608	hypothetical protein ZWY2020_044259	837	20	1.42E-113	75.78	-	-	-	-	-	-	-	-	-	-
HORVU.MOREX.r3.4HG0415860.1	0	0	16.2806	48.1284	16.1022	0	32.2045	Inf	Inf	0.000670698	0.0132464	putative G-type lectin S-receptor-like serine/threonine-protein kinase At1g61610	2001	20	0	88.33	7	F:GO:0004674; F:GO:0004712; F:GO:0005524; P:GO:0006468; C:GO:0016021; P:GO:0048544; F:GO:0106310	F:protein serine/threonine kinase activity; F:protein serine/threonine/tyrosine kinase activity; F:ATP binding; P:protein phosphorylation; C:integral component of membrane; P:recognition of pollen; F:protein serine kinase activity	EC:2.7.1; EC:2.7.12.1; EC:2.7; EC:2	Transferring phosphorus-containing groups; Dual-specificity kinase; Transferring phosphorus-containing groups; Transferases	-	-	-	-	-
HORVU.MOREX.r3.3HG0318080.1	0	0	22.9844	0	5.74609	0	11.4922	Inf	Inf	0.0209831	0.162861	protein synthesis inhibitor II-like	768	20	1.49E-124	51.89	6	P:GO:0006952; F:GO:0016787; P:GO:0017148; F:GO:0030598; P:GO:0035821; F:GO:0090729	P:defense response; F:hydrolase activity; P:negative regulation of translation; F:rRNA N-glycosylase activity; P:modulation of process of another organism; F:toxin activity	-	-	-	-	-	-	-
HORVU.MOREX.r3.3HG0306200.1	463.28	459.328	90.9797	83.4225	274.253	461.304	87.2011	0.189032	-2.4033	0.00228873	0.0345657	fructokinase 1	972	20	0	96.42	6	F:GO:0005524; C:GO:0005829; P:GO:0006000; F:GO:0008865; P:GO:0019252; P:GO:0046835	F:ATP binding; C:cytosol; P:fructose metabolic process; F:fructokinase activity; P:starch biosynthetic process; P:carbohydrate phosphorylation	EC:2.7.1; EC:2.7.1.4; EC:2.7; EC:2; EC:2.7.1.1	Transferring phosphorus-containing groups; Fructokinase; Transferring phosphorus-containing groups; Transferases; Hexokinase	-	-	-	K00847	Metabolic pathways; Biosynthesis of secondary metabolites; Biosynthesis of nucleotide sugars; Fructose and mannose metabolism; Starch and sucrose metabolism; Amino sugar and nucleotide sugar metabolism;
HORVU.MOREX.r3.5HG0426410.1	105.154	104.018	26.8151	16.0428	63.0076	104.586	21.4289	0.204892	-2.28706	0.0175438	0.145855	9-cis-epoxycarotenoid dioxygenase NCED5, chloroplastic-like	1824	20	0	96.01	4	C:GO:0009570; F:GO:0010436; P:GO:0016121; F:GO:0046872	C:chloroplast stroma; F:carotenoid dioxygenase activity; P:carotene catabolic process; F:metal ion binding	EC:1.13.11; EC:1.13; EC:1	Acting on single donors with incorporation of molecular oxygen (oxygenases). The oxygen incorporated need not be derived from O(2); Acting on single donors with incorporation of molecular oxygen (oxygenases). The oxygen incorporated need not be derived from O(2); Oxidoreductases	-	-	-	K09840	Metabolic pathways; Biosynthesis of secondary metabolites; Carotenoid biosynthesis;
HORVU.MOREX.r3.7HG0718020.1	0	0	13.4075	22.4599	8.96686	0	17.9337	Inf	Inf	0.00894512	0.0926724	hypothetical protein ZWY2020_004145	705	20	1.79E-145	96.88	-	-	-	-	-	-	-	-	-	-
HORVU.MOREX.r3.7HG0670240.1	0	0	9.57681	25.6685	8.81132	0	17.6226	Inf	Inf	0.0108806	0.106356	hypothetical protein ZWY2020_012798	576	20	9.22E-70	88.99	-	-	-	-	-	-	-	-	-	-
HORVU.MOREX.r3.5HG0473830.1	0	0	13.4075	30.4813	10.9722	0	21.9444	Inf	Inf	0.00429328	0.0550517	uncharacterized protein LOC123395908	765	20	4.63E-164	87.86	1	C:GO:0016021	C:integral component of membrane	-	-	-	-	-	-	-
HORVU.MOREX.r3.7HG0652310.1	0	0	8.61913	17.6471	6.56655	0	13.1331	Inf	Inf	0.0263629	0.187161	hypothetical protein ZWY2020_021451, partial	690	20	3.01E-140	94.31	-	-	-	-	-	-	-	-	-	-
HORVU.MOREX.r3.2HG0169710.1	30.645	20.5977	316.993	365.776	183.503	25.6213	341.384	13.3242	3.73598	1.32E-05	0.000540367	glycolipid transfer protein 3-like	891	20	1.47E-128	85.51	5	C:GO:0005829; P:GO:0120009; F:GO:1902387; F:GO:1902388; P:GO:1902389	C:cytosol; P:intermembrane lipid transfer; F:ceramide 1-phosphate binding; F:ceramide 1-phosphate transfer activity; P:ceramide 1-phosphate transport	EC:7	n/a	-	-	-	-	-
HORVU.MOREX.r3.2HG0125410.1	12.6185	6.1793	746.991	1119.79	471.394	9.39892	933.389	99.3082	6.63384	2.82E-11	1.76E-08	transposase family protein	573	20	1.45E-121	85.73	-	-	-	-	-	-	-	-	-	-
HORVU.MOREX.r3.5HG0537780.1	1082.19	926.895	242.293	255.08	626.615	1004.54	248.687	0.247562	-2.01414	0.0108739	0.106356	COP1-interacting protein 7-like	3813	20	0	94.5	-	-	-	-	-	-	-	-	-	-
HORVU.MOREX.r3.3HG0262520.1	0	0	2.87304	20.8556	5.93217	0	11.8643	Inf	Inf	0.0434062	0.247936	unnamed protein product	396	20	4.78E-37	74.72	1	C:GO:0016020	C:membrane	-	-	-	-	-	-	-
HORVU.MOREX.r3.2HG0120720.1	0	0	13.4075	24.0642	9.36793	0	18.7359	Inf	Inf	0.00771331	0.0834925	hypothetical protein D1007_61363	375	20	9.29E-76	94.04	-	-	-	-	-	-	-	-	-	-
HORVU.MOREX.r3.7HG0659620.1	0	1.02988	21.069	19.2514	10.3376	0.514942	20.1602	39.1504	5.29095	0.0123295	0.11596	receptor-like protein kinase FERONIA	456	20	1.96E-76	65.55	2	F:GO:0016301; P:GO:0016310	F:kinase activity; P:phosphorylation	EC:2.7; EC:2	Transferring phosphorus-containing groups; Transferases	-	-	-	-	-
HORVU.MOREX.r3.7HG0688110.1	0	6.1793	77.5722	139.572	55.831	3.08965	108.572	35.1406	5.13507	2.27E-06	0.00012767	hypothetical protein ZWY2020_029035	477	20	4.68E-107	93.14	1	C:GO:0016021	C:integral component of membrane	-	-	-	-	-	-	-
HORVU.MOREX.r3.2HG0182080.1	606.29	587.034	172.383	113.904	369.903	596.662	143.143	0.239907	-2.05945	0.0105573	0.104008	phenylalanine ammonia-lyase-like	2142	20	0	99.28	4	C:GO:0005737; P:GO:0006559; P:GO:0009800; F:GO:0045548	C:cytoplasm; P:L-phenylalanine catabolic process; P:cinnamic acid biosynthetic process; F:phenylalanine ammonia-lyase activity	EC:4.3.1.24; EC:4.3.1.25; EC:4.3; EC:4; EC:4.3.1	Phenylalanine ammonia-lyase; Phenylalanine/tyrosine ammonia-lyase; Carbon-nitrogen lyases; Lyases; Carbon-nitrogen lyases	-	-	-	K10775	Metabolic pathways; Biosynthesis of secondary metabolites; Phenylalanine metabolism; Phenylpropanoid biosynthesis;
HORVU.MOREX.r3.2HG0108730.1	0	0	47.8841	80.214	32.0245	0	64.049	Inf	Inf	1.56E-06	9.39E-05	protein FAR1-RELATED SEQUENCE 5-like	1032	20	0	80.15	-	-	-	-	-	-	-	-	-	-
HORVU.MOREX.r3.5HG0489700.1	1.20177	3.08965	22.9844	35.2942	15.6425	2.14571	29.1393	13.5803	3.76344	0.0215069	0.165108	mechanosensitive ion channel protein 5-like	2757	20	0	89.72	5	C:GO:0005886; P:GO:0006820; F:GO:0008381; C:GO:0016021; P:GO:0034220	C:plasma membrane; P:anion transport; F:mechanosensitive ion channel activity; C:integral component of membrane; P:ion transmembrane transport	EC:7	n/a	-	-	-	-	-
HORVU.MOREX.r3.6HG0582320.1	0	0	9.57681	12.8342	5.60276	0	11.2055	Inf	Inf	0.0369057	0.226003	ATP-dependent DNA helicase PIF1-like isoform X1	1248	20	0	92.4	-	-	-	-	-	-	-	-	-	-
HORVU.MOREX.r3.1HG0086910.1	7.81147	9.26895	43.0957	51.3369	27.8783	8.54021	47.2163	5.5287	2.46694	0.0414155	0.242052	endochitinase A-like	1494	20	4.12E-136	65.35	2	F:GO:0003676; F:GO:0008270	F:nucleic acid binding; F:zinc ion binding	-	-	-	-	-	-	-
HORVU.MOREX.r3.6HG0558530.1	0	0	11.4922	27.2728	9.69123	0	19.3825	Inf	Inf	0.00732051	0.0803651	hypothetical protein ZWY2020_032988, partial	690	20	2.29E-138	95.74	-	-	-	-	-	-	-	-	-	-
HORVU.MOREX.r3.3HG0221570.1	2.40353	0	224.097	328.877	138.845	1.20177	276.487	230.068	7.84591	8.74E-12	8.20E-09	predicted protein	762	20	4.19E-174	92.4	1	P:GO:0032196	P:transposition	-	-	-	-	-	-	-
HORVU.MOREX.r3.3HG0230130.1	0	0	11.4922	17.6471	7.28481	0	14.5696	Inf	Inf	0.0178658	0.147264	hypothetical protein ZWY2020_038257	573	20	2.56E-71	87.33	-	-	-	-	-	-	-	-	-	-
HORVU.MOREX.r3.4HG0403060.1	2.40353	5.14942	39.2649	40.107	21.7312	3.77647	39.686	10.5087	3.39352	0.0122154	0.115233	Fatty acyl-CoA reductase 2	1857	20	0	93.31	9	C:GO:0009507; P:GO:0009556; P:GO:0009635; P:GO:0010345; P:GO:0010584; P:GO:0035336; F:GO:0080019; F:GO:0102965; P:GO:1903175	C:chloroplast; P:microsporogenesis; P:response to herbicide; P:suberin biosynthetic process; P:pollen exine formation; P:long-chain fatty-acyl-CoA metabolic process; F:fatty-acyl-CoA reductase (alcohol-forming) activity; F:alcohol-forming fatty acyl-CoA reductase activity; P:fatty alcohol biosynthetic process	EC:1.2; EC:1; EC:1.2.1.84; EC:1.2.1	Acting on the aldehyde or oxo group of donors; Oxidoreductases; Alcohol-forming fatty acyl-CoA reductase; Acting on the aldehyde or oxo group of donors	-	-	-	K13356	Cutin, suberine and wax biosynthesis;
HORVU.MOREX.r3.4HG0384630.1	4.80706	4.11953	47.8841	60.9626	29.4433	4.4633	54.4233	12.1935	3.60804	0.00466068	0.0584649	Alternative oxidase 1a, mitochondrial	1881	20	0	92.54	-	-	-	-	-	-	-	-	-	-
HORVU.MOREX.r3.7HG0640690.1	0	0	17.2383	9.62568	6.71599	0	13.432	Inf	Inf	0.0179014	0.147392	---NA---	246	-	-	-	-	-	-	-	-	-	-	-	-	-
HORVU.MOREX.r3.3HG0227740.1	2.40353	0	69.9107	72.1926	36.1267	1.20177	71.0517	59.1228	5.88564	2.85E-05	0.00102136	D-3-phosphoglycerate dehydrogenase, chloroplastic	1701	20	0	79.07	-	-	-	-	-	-	-	-	-	-
HORVU.MOREX.r3.2HG0097850.1	3.00441	0	11.4922	38.5027	13.2498	1.50221	24.9974	16.6405	4.05663	0.0493869	0.266451	disease resistance protein RGA2-like	1461	20	0	90	-	-	-	-	-	-	-	-	-	-
HORVU.MOREX.r3.6HG0552800.1	293.231	220.395	57.4609	28.877	149.991	256.813	43.169	0.168095	-2.57265	0.00203069	0.031649	histone H2B.4-like	408	20	7.54E-64	97.58	5	C:GO:0000786; F:GO:0003677; C:GO:0005634; P:GO:0006334; F:GO:0046982	C:nucleosome; F:DNA binding; C:nucleus; P:nucleosome assembly; F:protein heterodimerization activity	-	-	-	-	-	K11252	-
HORVU.MOREX.r3.4HG0353630.1	17.4256	22.6574	1516.01	2586.1	1035.55	20.0415	2051.05	102.34	6.67723	2.12E-10	7.15E-08	transposase family protein	552	20	4.87E-104	85.06	-	-	-	-	-	-	-	-	-	-
HORVU.MOREX.r3.5HG0497850.1	1.20177	0	114.922	144.385	65.1272	0.600883	129.653	215.772	7.75336	7.30E-09	1.12E-06	protein HAPLESS 2-like isoform X2	2181	20	0	93.92	3	C:GO:0005886; F:GO:0008289; C:GO:0016021	C:plasma membrane; F:lipid binding; C:integral component of membrane	-	-	-	-	-	-	-
HORVU.MOREX.r3.5HG0424650.1	1.20177	0	18.1959	22.4599	10.4644	0.600883	20.3279	33.8301	5.08024	0.0245227	0.179056	beta-1,2-xylosyltransferase XYXT1-like isoform X2	1587	20	0	82.59	4	C:GO:0000139; C:GO:0016021; F:GO:0016763; C:GO:0098791	C:Golgi membrane; C:integral component of membrane; F:pentosyltransferase activity; C:Golgi apparatus subcompartment	EC:2.4.2; EC:2.4; EC:2	Glycosyltransferases; Glycosyltransferases; Transferases	-	-	-	-	-
HORVU.MOREX.r3.4HG0399610.1	24.0353	28.8367	333.273	486.097	218.06	26.436	409.685	15.4972	3.95394	3.46E-06	0.000179822	vicilin-like seed storage protein At2g18540	2265	20	0	91.89	-	-	-	-	-	-	-	-	-	-
HORVU.MOREX.r3.7HG0675010.1	0	0	6.70377	14.4385	5.28557	0	10.5711	Inf	Inf	0.0471644	0.259875	hypothetical protein ZWY2020_032988, partial	690	20	3.35E-137	94.48	-	-	-	-	-	-	-	-	-	-
HORVU.MOREX.r3.1HG0066260.1	1019.7	1064.9	260.489	178.075	630.79	1042.3	219.282	0.210383	-2.24891	0.00704491	0.0783011	tubulin beta-1 chain	1338	20	0	99.9	7	P:GO:0000226; P:GO:0000278; F:GO:0003924; F:GO:0005200; F:GO:0005525; C:GO:0005737; C:GO:0005874	P:microtubule cytoskeleton organization; P:mitotic cell cycle; F:GTPase activity; F:structural constituent of cytoskeleton; F:GTP binding; C:cytoplasm; C:microtubule	EC:3.6.1; EC:3.6; EC:3; EC:3.6.1.15	Acting on acid anhydrides; Acting on acid anhydrides; Hydrolases; Nucleoside-triphosphate phosphatase	-	-	-	K07375	Pathogenic Escherichia coli infection; Salmonella infection;
HORVU.MOREX.r3.3HG0230060.1	4.80706	0	44.0533	44.9198	23.4451	2.40353	44.4866	18.5089	4.21014	0.00525762	0.0636971	putative disease resistance protein RGA4 isoform X1	3048	20	0	93.51	2	P:GO:0006952; F:GO:0043531	P:defense response; F:ADP binding	-	-	-	-	-	-	-
HORVU.MOREX.r3.6HG0604620.1	52.2768	55.6137	7.66145	9.62568	31.2944	53.9452	8.64356	0.160228	-2.6418	0.0233368	0.173888	histone H4	312	20	4.12E-50	100	7	C:GO:0000786; F:GO:0003677; C:GO:0005634; P:GO:0006334; P:GO:0006352; P:GO:0009414; F:GO:0046982	C:nucleosome; F:DNA binding; C:nucleus; P:nucleosome assembly; P:DNA-templated transcription initiation; P:response to water deprivation; F:protein heterodimerization activity	-	-	-	-	-	K11254	-
HORVU.MOREX.r3.4HG0398150.1	0	0	45.011	72.1926	29.3009	0	58.6018	Inf	Inf	3.69E-06	0.000188878	hypothetical protein D1007_52197	531	20	1.05E-94	81.3	2	C:GO:0016020; F:GO:0046872	C:membrane; F:metal ion binding	-	-	-	-	-	-	-
HORVU.MOREX.r3.4HG0415690.1	1.20177	4.11953	26.8151	28.877	15.2534	2.66065	27.8461	10.4659	3.38762	0.0296563	0.199936	sodium transporter	1533	20	0	99.61	4	P:GO:0006813; F:GO:0008324; C:GO:0016021; P:GO:0098655	P:potassium ion transport; F:cation transmembrane transporter activity; C:integral component of membrane; P:cation transmembrane transport	EC:7	n/a	-	-	-	-	-
HORVU.MOREX.r3.5HG0429340.1	0	0	5.74609	28.877	8.65578	0	17.3116	Inf	Inf	0.0133264	0.122463	hypothetical protein ZWY2020_020465	594	20	1.44E-126	78	2	C:GO:0016020; C:GO:0016021	C:membrane; C:integral component of membrane	-	-	-	-	-	-	-
HORVU.MOREX.r3.6HG0623180.1	3.00441	2.05977	27.7728	59.3583	23.0488	2.53209	43.5656	17.2054	4.10479	0.00637805	0.0731598	serine/threonine-protein kinase BLUS1-like isoform X2	2088	20	0	94.79	3	F:GO:0004672; F:GO:0005524; P:GO:0006468	F:protein kinase activity; F:ATP binding; P:protein phosphorylation	EC:2.7.1; EC:2.7; EC:2	Transferring phosphorus-containing groups; Transferring phosphorus-containing groups; Transferases	-	-	-	-	-
HORVU.MOREX.r3.7HG0740390.1	0	0	22.9844	32.0856	13.7675	0	27.535	Inf	Inf	0.00121097	0.0211731	fasciclin-like arabinogalactan protein 14	834	20	5.18E-122	83.11	1	C:GO:0046658	C:anchored component of plasma membrane	-	-	-	-	-	-	-
HORVU.MOREX.r3.3HG0246780.1	0	0	22.9844	43.3156	16.575	0	33.15	Inf	Inf	0.000467005	0.0098837	hypothetical protein ZWY2020_033071	573	20	4.52E-59	85.01	-	-	-	-	-	-	-	-	-	-
HORVU.MOREX.r3.7HG0679060.1	2.40353	0	17.2383	25.6685	11.3276	1.20177	21.4534	17.8515	4.15798	0.0474089	0.260687	uncharacterized protein LOC123409590	750	20	1.52E-138	88.77	1	C:GO:0016021	C:integral component of membrane	-	-	-	-	-	-	-
HORVU.MOREX.r3.5HG0490520.1	3.6053	0	55.5455	75.4011	33.638	1.80265	65.4733	36.3206	5.18272	0.000206332	0.00516794	tonoplast dicarboxylate transporter-like	1629	20	0	95.84	3	C:GO:0016021; F:GO:0022857; P:GO:0098656	C:integral component of membrane; F:transmembrane transporter activity; P:anion transmembrane transport	EC:7	n/a	-	-	-	-	-
HORVU.MOREX.r3.3HG0316680.1	0	0	10.5345	19.2514	7.44646	0	14.8929	Inf	Inf	0.0174358	0.145214	protein FAR1-RELATED SEQUENCE 5-like	687	20	1.84E-164	81.41	2	F:GO:0003676; F:GO:0008270	F:nucleic acid binding; F:zinc ion binding	-	-	-	-	-	-	-
HORVU.MOREX.r3.2HG0200490.1	0	0	7.66145	16.0428	5.92606	0	11.8521	Inf	Inf	0.0352772	0.220637	F-box/LRR-repeat protein	1575	20	0	76.88	-	-	-	-	-	-	-	-	-	-
HORVU.MOREX.r3.1HG0014570.1	0	0	11.4922	14.4385	6.48267	0	12.9653	Inf	Inf	0.0242999	0.178331	predicted protein	582	20	1.53E-139	87.49	-	-	-	-	-	-	-	-	-	-
HORVU.MOREX.r3.3HG0312760.1	162.839	154.483	1016.1	811.766	536.297	158.661	913.933	5.76029	2.52614	0.00145944	0.0244291	beta-glucosidase 5-like isoform X2	1515	20	0	97.69	4	P:GO:0005975; F:GO:0008422; C:GO:0009507; F:GO:0102726	P:carbohydrate metabolic process; F:beta-glucosidase activity; C:chloroplast; F:DIMBOA glucoside beta-D-glucosidase activity	EC:3.2; EC:3.2.1.21; EC:3; EC:3.2.1.182; EC:3.2.1	Glycosylases; Beta-glucosidase; Hydrolases; 4-hydroxy-7-methoxy-3-oxo-3,4-dihydro-2H-1,4-benzoxazin-2-yl glucoside; Glycosylases	-	-	-	K01188	Metabolic pathways; Biosynthesis of secondary metabolites; Starch and sucrose metabolism; Cyanoamino acid metabolism; Biosynthesis of various plant secondary metabolites;
HORVU.MOREX.r3.2HG0159330.1	0	0	46.9264	80.214	31.7851	0	63.5702	Inf	Inf	1.71E-06	0.000100723	hypothetical protein ZWY2020_021451, partial	774	20	3.45E-152	94.94	-	-	-	-	-	-	-	-	-	-
HORVU.MOREX.r3.4HG0389740.1	2.40353	4.11953	40.2226	30.4813	19.3067	3.26153	35.352	10.8391	3.43817	0.0151786	0.13343	ATP-dependent DNA helicase PIF1-like isoform X1	2169	20	0	92.49	-	-	-	-	-	-	-	-	-	-
HORVU.MOREX.r3.3HG0320240.1	7.21059	5.14942	186.748	291.979	122.772	6.18	239.363	38.7319	5.27545	5.74E-08	6.13E-06	calmodulin binding protein PICBP-like	1347	20	0	69.77	1	F:GO:0005516	F:calmodulin binding	-	-	-	-	-	-	-
HORVU.MOREX.r3.2HG0106410.1	0	0	2.87304	20.8556	5.93217	0	11.8643	Inf	Inf	0.0434062	0.247936	5-pentadecatrienyl resorcinol O-methyltransferase	1017	20	0	77.09	4	F:GO:0008171; F:GO:0008757; P:GO:0019438; P:GO:0032259	F:O-methyltransferase activity; F:S-adenosylmethionine-dependent methyltransferase activity; P:aromatic compound biosynthetic process; P:methylation	EC:2.1; EC:2; EC:2.1.1	Transferring one-carbon groups; Transferases; Transferring one-carbon groups	-	-	-	-	-
HORVU.MOREX.r3.4HG0386170.1	0	0	15.3229	30.4813	11.4511	0	22.9021	Inf	Inf	0.00339938	0.0463771	hypothetical protein D1007_59071	393	20	4.33E-65	97.33	-	-	-	-	-	-	-	-	-	-
HORVU.MOREX.r3.1HG0077860.1	2.40353	4.11953	34.4765	70.5883	27.897	3.26153	52.5324	16.1067	4.00959	0.00269649	0.0393316	Lactation elevated protein 1	420	20	2.47E-79	82.03	-	-	-	-	-	-	-	-	-	-
HORVU.MOREX.r3.4HG0391670.1	37.8556	28.8367	1053.45	1836.9	739.26	33.3462	1445.17	43.3386	5.43758	2.08E-08	2.60E-06	transposase family protein	819	20	8.67E-171	89.21	4	F:GO:0003676; P:GO:0015074; F:GO:0016740; F:GO:0016787	F:nucleic acid binding; P:DNA integration; F:transferase activity; F:hydrolase activity	EC:2; EC:3	Transferases; Hydrolases	-	-	-	-	-
HORVU.MOREX.r3.2HG0186030.1	3.6053	4.11953	45.011	46.5241	24.815	3.86241	45.7676	11.8495	3.56675	0.00722777	0.0797559	serine/threonine-protein phosphatase 7 long form homolog	789	20	6.19E-93	62.07	4	P:GO:0010073; P:GO:0048235; P:GO:0048507; C:GO:0110165	P:meristem maintenance; P:pollen sperm cell differentiation; P:meristem development; C:cellular anatomical entity	-	-	-	-	-	-	-
HORVU.MOREX.r3.3HG0309360.1	7.21059	8.23907	93.8528	131.551	60.2133	7.72483	112.702	14.5896	3.86686	0.000149809	0.0040523	serine/threonine-protein kinase PAK 3-like	2148	20	0	91.63	6	F:GO:0004672; F:GO:0005524; P:GO:0006355; P:GO:0006468; P:GO:0009785; F:GO:0009882	F:protein kinase activity; F:ATP binding; P:regulation of DNA-templated transcription; P:protein phosphorylation; P:blue light signaling pathway; F:blue light photoreceptor activity	EC:2.7.1; EC:2.7; EC:2	Transferring phosphorus-containing groups; Transferring phosphorus-containing groups; Transferases	-	-	-	-	-
HORVU.MOREX.r3.6HG0600420.1	10.215	8.23907	64.1646	117.112	49.9328	9.22704	90.6385	9.82315	3.29619	0.00238029	0.0356953	putative methionyl-tRNA synthetase	1479	20	0	91.48	-	-	-	-	-	-	-	-	-	-
HORVU.MOREX.r3.6HG0556490.1	0	0	8.61913	12.8342	5.36334	0	10.7267	Inf	Inf	0.042105	0.243846	pentatricopeptide repeat-containing protein At4g19220, mitochondrial-like	300	20	3.03E-62	95.45	3	F:GO:0003723; C:GO:0005739; P:GO:0009451	F:RNA binding; C:mitochondrion; P:RNA modification	-	-	-	-	-	-	-
HORVU.MOREX.r3.6HG0595600.1	2.40353	0	45.011	64.1712	27.8964	1.20177	54.5911	45.4258	5.50544	0.000330633	0.00746908	pentatricopeptide repeat-containing protein At1g33350	1581	20	0	93.47	-	-	-	-	-	-	-	-	-	-
HORVU.MOREX.r3.5HG0436530.1	12.0177	12.3586	200.155	263.102	121.908	12.1881	231.629	19.0044	4.24827	2.59E-06	0.000141153	hypothetical protein CFC21_005632	987	20	1.47E-42	53.73	9	C:GO:0000428; F:GO:0003676; F:GO:0003677; F:GO:0003899; P:GO:0006351; F:GO:0008270; F:GO:0016740; F:GO:0016779; F:GO:0032549	C:DNA-directed RNA polymerase complex; F:nucleic acid binding; F:DNA binding; F:DNA-directed 5'-3' RNA polymerase activity; P:DNA-templated transcription; F:zinc ion binding; F:transferase activity; F:nucleotidyltransferase activity; F:ribonucleoside binding	-	-	-	-	-	-	-
HORVU.MOREX.r3.7HG0719040.1	1.20177	0	96.7258	125.134	55.7653	0.600883	110.93	184.611	7.52835	5.34E-08	5.79E-06	outer envelope protein 61-like	1239	20	0	89.85	1	C:GO:0016021	C:integral component of membrane	-	-	-	-	-	-	-
HORVU.MOREX.r3.2HG0201400.1	966.219	1348.12	190.579	117.112	655.507	1157.17	153.845	0.13295	-2.91104	0.000757252	0.0145204	serine hydroxymethyltransferase 4	1416	20	0	98.38	11	F:GO:0004372; C:GO:0005737; P:GO:0006565; F:GO:0008168; F:GO:0008270; P:GO:0019264; F:GO:0030170; P:GO:0032259; P:GO:0035999; P:GO:0046655; F:GO:0070905	F:glycine hydroxymethyltransferase activity; C:cytoplasm; P:L-serine catabolic process; F:methyltransferase activity; F:zinc ion binding; P:glycine biosynthetic process from serine; F:pyridoxal phosphate binding; P:methylation; P:tetrahydrofolate interconversion; P:folic acid metabolic process; F:serine binding	EC:2.1; EC:2; EC:2.1.2.1; EC:2.1.2; EC:2.1.1	Transferring one-carbon groups; Transferases; Glycine hydroxymethyltransferase; Transferring one-carbon groups; Transferring one-carbon groups	-	-	-	K00600	Metabolic pathways; Biosynthesis of secondary metabolites; Microbial metabolism in diverse environments; Carbon metabolism; Biosynthesis of amino acids; Biosynthesis of cofactors; Glycine, serine and threonine metabolism; Cyanoamino acid metabolism; One carbon pool by folate;
HORVU.MOREX.r3.2HG0107790.1	5.40794	21.6276	50.7571	93.0482	42.7102	13.5177	71.9027	5.31913	2.41119	0.0169658	0.142967	protein PARTING DANCERS homolog isoform X1	747	20	2.09E-170	96.56	1	P:GO:0000712	P:resolution of meiotic recombination intermediates	-	-	-	-	-	-	-
HORVU.MOREX.r3.4HG0343450.1	0	0	127.372	243.851	92.8055	0	185.611	Inf	Inf	3.64E-12	4.14E-09	predicted protein	693	20	5.66E-136	88.9	1	P:GO:0032196	P:transposition	-	-	-	-	-	-	-
HORVU.MOREX.r3.6HG0594730.1	1607.96	1427.42	257.616	243.851	884.212	1517.69	250.733	0.165207	-2.59765	0.00213094	0.0328029	receptor kinase-like protein Xa21	3003	20	0	79.67	5	F:GO:0004672; F:GO:0005524; P:GO:0006468; C:GO:0016021; C:GO:0043226	F:protein kinase activity; F:ATP binding; P:protein phosphorylation; C:integral component of membrane; C:organelle	EC:2.7.1; EC:2.7; EC:2	Transferring phosphorus-containing groups; Transferring phosphorus-containing groups; Transferases	-	-	-	-	-
HORVU.MOREX.r3.6HG0594730.2	1265.46	1257.49	214.521	269.519	751.747	1261.47	242.02	0.191855	-2.38191	0.00331036	0.0455099	receptor kinase-like protein Xa21	2964	20	0	79.67	5	F:GO:0004672; F:GO:0005524; P:GO:0006468; C:GO:0016021; C:GO:0043226	F:protein kinase activity; F:ATP binding; P:protein phosphorylation; C:integral component of membrane; C:organelle	EC:2.7.1; EC:2.7; EC:2	Transferring phosphorus-containing groups; Transferring phosphorus-containing groups; Transferases	-	-	-	-	-
HORVU.MOREX.r3.2HG0208950.1	0.600883	0	18.1959	24.0642	10.7153	0.300441	21.1301	70.3301	6.13607	0.0117367	0.112276	protein MAIN-LIKE 1-like isoform X2	780	20	0	86.53	-	-	-	-	-	-	-	-	-	-
HORVU.MOREX.r3.5HG0479320.1	0	0	7.66145	17.6471	6.32713	0	12.6543	Inf	Inf	0.0301232	0.201313	Protein DA1-related 1	435	20	7.46E-93	90.66	-	-	-	-	-	-	-	-	-	-
HORVU.MOREX.r3.2HG0181910.1	2.40353	0	20.1113	54.5455	19.2651	1.20177	37.3284	31.0613	4.95705	0.00590026	0.0690971	hypothetical protein D1007_08529	717	20	2.58E-157	78.78	-	-	-	-	-	-	-	-	-	-
HORVU.MOREX.r3.3HG0237370.2	37.2547	25.7471	1872.27	2894.12	1207.35	31.5009	2383.19	75.6548	6.24136	4.37E-09	7.42E-07	guanine nucleotide-binding protein subunit beta-like protein isoform X1	1449	20	0	93.35	-	-	-	-	-	-	-	-	-	-
HORVU.MOREX.r3.3HG0237370.1	36.6538	45.3149	1724.78	2786.63	1148.35	40.9844	2255.71	55.0383	5.78236	1.56E-08	2.07E-06	guanine nucleotide-binding protein subunit beta-like protein isoform X1	1449	20	0	93.35	-	-	-	-	-	-	-	-	-	-
HORVU.MOREX.r3.3HG0244590.1	0	4.11953	67.0377	60.9626	33.03	2.05977	64.0002	31.0716	4.95752	6.29E-05	0.00199241	cytokinin dehydrogenase 2-like	1779	20	0	89.87	4	C:GO:0005615; P:GO:0009690; F:GO:0019139; F:GO:0071949	C:extracellular space; P:cytokinin metabolic process; F:cytokinin dehydrogenase activity; F:FAD binding	EC:1.5; EC:1; EC:1.5.99.12	Acting on the CH-NH group of donors; Oxidoreductases; Cytokinin dehydrogenase	-	-	-	K00279	Biosynthesis of secondary metabolites; Zeatin biosynthesis;
HORVU.MOREX.r3.5HG0511460.1	10.8159	8.23907	41.1803	104.278	41.1284	9.52748	72.7292	7.63363	2.93237	0.0125965	0.117796	ABC transporter B family member 25	1935	20	0	97.75	6	F:GO:0005524; C:GO:0005773; P:GO:0010044; C:GO:0016021; P:GO:0055085; F:GO:0140359	F:ATP binding; C:vacuole; P:response to aluminum ion; C:integral component of membrane; P:transmembrane transport; F:ABC-type transporter activity	EC:7	n/a	-	-	-	-	-
HORVU.MOREX.r3.5HG0452180.1	1.20177	0	128.329	202.139	82.9176	0.600883	165.234	274.986	8.10321	4.25E-10	1.19E-07	hypothetical protein ZWY2020_051643	738	20	3.08E-166	87.75	-	-	-	-	-	-	-	-	-	-
HORVU.MOREX.r3.5HG0463250.1	5.40794	4.11953	32.5612	40.107	20.5489	4.76374	36.3341	7.62722	2.93116	0.0417761	0.243324	hypothetical protein ZWY2020_054565	444	20	7.26E-40	94.11	-	-	-	-	-	-	-	-	-	-
HORVU.MOREX.r3.6HG0600380.1	0	2.05977	112.049	239.038	88.2865	1.02988	175.543	170.45	7.4132	2.84E-10	8.81E-08	hypothetical protein D1007_08596	1212	20	0	80.27	-	-	-	-	-	-	-	-	-	-
HORVU.MOREX.r3.4HG0362840.1	0	0	15.3229	12.8342	7.03928	0	14.0786	Inf	Inf	0.016987	0.142967	putative calcium-binding protein CML16	708	20	4.27E-144	93.87	-	-	-	-	-	-	-	-	-	-
HORVU.MOREX.r3.7HG0648950.1	0	0	7.66145	19.2514	6.7282	0	13.4564	Inf	Inf	0.0257243	0.184599	putative LRR receptor-like serine/threonine-protein kinase	333	20	5.38E-57	91.75	-	-	-	-	-	-	-	-	-	-
HORVU.MOREX.r3.4HG0353070.1	28.8424	24.7172	214.521	131.551	99.9078	26.7798	173.036	6.46143	2.69185	0.00107489	0.0191274	root phototropism protein 2-like	1881	20	0	95.41	1	P:GO:0016567	P:protein ubiquitination	-	-	-	-	-	-	-
HORVU.MOREX.r3.7HG0747390.1	1.20177	0	18.1959	40.107	14.8762	0.600883	29.1515	48.5144	5.60034	0.00701823	0.0780508	putative disease resistance protein RGA4	1410	20	0	81.04	2	P:GO:0006952; F:GO:0043531	P:defense response; F:ADP binding	-	-	-	-	-	-	-
HORVU.MOREX.r3.3HG0252260.1	1.20177	3.08965	83.3183	131.551	54.7902	2.14571	107.435	50.0695	5.64586	1.23E-06	7.77E-05	hypothetical protein CFC21_021060	462	20	1.85E-47	81.9	1	C:GO:0016021	C:integral component of membrane	-	-	-	-	-	-	-
HORVU.MOREX.r3.1HG0065490.1	34.2503	52.5241	5.74609	9.62568	25.5365	43.3872	7.68588	0.177146	-2.49699	0.0459207	0.256523	uncharacterized protein LOC123442746	318	20	1.61E-50	83.69	1	C:GO:0016021	C:integral component of membrane	-	-	-	-	-	-	-
HORVU.MOREX.r3.6HG0583830.1	3.6053	2.05977	93.8528	168.449	66.9918	2.83253	131.151	46.3017	5.53299	8.90E-07	6.09E-05	Polynucleotidyl transferase ribonuclease H-like superfamily protein	609	15	9.40E-31	56.46	5	F:GO:0003676; P:GO:0006139; F:GO:0008408; F:GO:0016740; P:GO:0090305	F:nucleic acid binding; P:nucleobase-containing compound metabolic process; F:3'-5' exonuclease activity; F:transferase activity; P:nucleic acid phosphodiester bond hydrolysis	-	-	-	-	-	-	-
HORVU.MOREX.r3.2HG0157550.1	1.80265	0	17.2383	27.2728	11.5784	0.901324	22.2555	24.692	4.62597	0.0301984	0.201636	uncharacterized protein LOC123430134	561	8	9.84E-116	87.63	-	-	-	-	-	-	-	-	-	-
HORVU.MOREX.r3.5HG0467680.1	0	0	12.4499	12.8342	6.32102	0	12.642	Inf	Inf	0.0249225	0.1812	hypothetical protein D1007_17145	456	20	3.51E-90	89.39	-	-	-	-	-	-	-	-	-	-
HORVU.MOREX.r3.3HG0296880.1	0	4.11953	56.5032	113.904	43.6316	2.05977	85.2035	41.3656	5.37036	8.56E-06	0.000378882	F-box protein At5g07610-like	1260	20	0	88.02	-	-	-	-	-	-	-	-	-	-
HORVU.MOREX.r3.7HG0703310.1	10.8159	11.3287	748.907	1243.32	503.592	11.0723	996.112	89.9643	6.49128	3.85E-11	2.19E-08	transposase family protein	570	20	1.80E-125	87.35	-	-	-	-	-	-	-	-	-	-
HORVU.MOREX.r3.2HG0215640.1	1.20177	0	15.3229	19.2514	8.94401	0.600883	17.2871	28.7696	4.84647	0.0419963	0.243846	putative receptor-like protein kinase At4g00960	1986	20	0	73.38	4	F:GO:0004672; F:GO:0005524; P:GO:0006468; C:GO:0016021	F:protein kinase activity; F:ATP binding; P:protein phosphorylation; C:integral component of membrane	EC:2.7.1; EC:2.7; EC:2	Transferring phosphorus-containing groups; Transferring phosphorus-containing groups; Transferases	-	-	-	-	-
HORVU.MOREX.r3.1HG0038650.1	0	0	60.3339	109.091	42.3562	0	84.7125	Inf	Inf	8.42E-08	8.25E-06	hypothetical protein D1007_17333	684	20	1.53E-114	91.43	-	-	-	-	-	-	-	-	-	-
HORVU.MOREX.r3.7HG0683570.1	0	0	3.83073	22.4599	6.57266	0	13.1453	Inf	Inf	0.0321312	0.209465	CBS domain-containing protein CBSX6-like	951	20	0	84.6	10	C:GO:0005634; C:GO:0005737; P:GO:0006468; F:GO:0016208; F:GO:0019887; F:GO:0019901; F:GO:0020037; C:GO:0031588; P:GO:0042149; P:GO:0050790	C:nucleus; C:cytoplasm; P:protein phosphorylation; F:AMP binding; F:protein kinase regulator activity; F:protein kinase binding; F:heme binding; C:nucleotide-activated protein kinase complex; P:cellular response to glucose starvation; P:regulation of catalytic activity	-	-	-	-	-	-	-
HORVU.MOREX.r3.2HG0185980.1	0	0	12.4499	9.62568	5.51888	0	11.0378	Inf	Inf	0.0338699	0.215054	heavy metal-associated isoprenylated plant protein 28	372	20	4.59E-76	90.73	1	F:GO:0046872	F:metal ion binding	-	-	-	-	-	-	-
HORVU.MOREX.r3.7HG0714440.1	382.762	320.294	71.8261	75.4011	212.571	351.528	73.6136	0.20941	-2.25559	0.00348535	0.0472598	protein argonaute PNH1	2868	20	0	96.67	5	F:GO:0003723; C:GO:0005737; P:GO:0019827; P:GO:0035194; P:GO:0048366	F:RNA binding; C:cytoplasm; P:stem cell population maintenance; P:post-transcriptional gene silencing by RNA; P:leaf development	-	-	-	-	-	K11593	Axon regeneration;
HORVU.MOREX.r3.6HG0566100.1	12.0177	6.1793	203.986	463.637	171.455	9.09848	333.811	36.6887	5.19726	5.46E-08	5.87E-06	transposase family protein	411	20	1.22E-47	75.99	1	F:GO:0003676	F:nucleic acid binding	-	-	-	-	-	-	-
HORVU.MOREX.r3.6HG0610400.1	0	0	10.5345	11.23	5.44111	0	10.8822	Inf	Inf	0.0377099	0.229149	unnamed protein product	1479	20	3.84E-164	65.65	4	P:GO:0006508; F:GO:0008233; F:GO:0008234; F:GO:0016787	P:proteolysis; F:peptidase activity; F:cysteine-type peptidase activity; F:hydrolase activity	-	-	-	-	-	-	-
HORVU.MOREX.r3.4HG0369080.1	0	0	15.3229	16.0428	7.84142	0	15.6828	Inf	Inf	0.0126207	0.117796	hypothetical protein ZWY2020_054565	576	20	1.25E-45	89.19	-	-	-	-	-	-	-	-	-	-
HORVU.MOREX.r3.5HG0470740.1	3.6053	2.05977	84.276	117.112	51.7634	2.83253	100.694	35.5492	5.15174	1.12E-05	0.000473958	hypothetical protein D1007_22974	882	20	3.48E-165	90.38	-	-	-	-	-	-	-	-	-	-
HORVU.MOREX.r3.6HG0625300.1	2.40353	4.11953	193.452	222.995	105.742	3.26153	208.223	63.8422	5.99644	3.08E-09	5.47E-07	predicted protein	2514	20	0	85.63	1	C:GO:0016021	C:integral component of membrane	-	-	-	-	-	-	-
HORVU.MOREX.r3.2HG0113870.1	4.80706	9.26895	40.2226	48.1284	25.6068	7.03801	44.1755	6.27671	2.65001	0.0307028	0.204132	pentatricopeptide repeat-containing protein At2g32630-like	1617	20	0	92.9	-	-	-	-	-	-	-	-	-	-
HORVU.MOREX.r3.4HG0397470.1	29.4432	25.7471	82.3606	150.802	72.0883	27.5952	116.581	4.22471	2.07885	0.0301071	0.201313	putative transposase	639	20	2.60E-124	84.77	-	-	-	-	-	-	-	-	-	-
HORVU.MOREX.r3.2HG0210320.1	15.6229	12.3586	72.7838	62.5669	40.8331	13.9908	67.6753	4.83714	2.27415	0.0296264	0.199806	pentatricopeptide repeat-containing protein At3g53700, chloroplastic-like	1611	20	0	90.93	-	-	-	-	-	-	-	-	-	-
HORVU.MOREX.r3.7HG0676670.1	0	2.05977	21.069	62.5669	21.4239	1.02988	41.8179	40.6045	5.34357	0.000957761	0.0174474	hypothetical protein ZWY2020_043005	591	20	6.17E-95	95.69	-	-	-	-	-	-	-	-	-	-
HORVU.MOREX.r3.2HG0136870.1	1.20177	0	14.3652	19.2514	8.70459	0.600883	16.8083	27.9727	4.80595	0.0465009	0.257922	hypothetical protein ZWY2020_037752	576	20	2.63E-54	90.43	-	-	-	-	-	-	-	-	-	-
HORVU.MOREX.r3.2HG0178150.1	61.29	70.0321	1415.45	2438.51	996.32	65.6611	1926.98	29.3474	4.87516	4.84E-07	3.62E-05	copia-type pol polyprotein	3312	20	0	66.76	2	F:GO:0005488; P:GO:0006259	F:binding; P:DNA metabolic process	-	-	-	-	-	-	-
HORVU.MOREX.r3.5HG0480680.1	0	0	9.57681	16.0428	6.4049	0	12.8098	Inf	Inf	0.0270218	0.189845	GDSL esterase/lipase At5g45910-like	1110	20	0	85.41	1	F:GO:0016788	F:hydrolase activity, acting on ester bonds	EC:3.1; EC:3	Acting on ester bonds; Hydrolases	-	-	-	-	-
HORVU.MOREX.r3.1HG0084200.1	3.6053	0	34.4765	52.9412	22.7558	1.80265	43.7089	24.247	4.59974	0.0039039	0.051231	Alternative oxidase 1a, mitochondrial	1950	20	0	92.28	-	-	-	-	-	-	-	-	-	-
HORVU.MOREX.r3.7HG0748690.1	0	2.05977	23.942	32.0856	14.5218	1.02988	28.0138	27.201	4.76559	0.00680719	0.0765426	heme oxygenase 1, chloroplastic-like	831	20	0	89.33	4	F:GO:0004392; P:GO:0006788; C:GO:0009507; P:GO:0015979	F:heme oxygenase (decyclizing) activity; P:heme oxidation; C:chloroplast; P:photosynthesis	EC:1.14.14.18; EC:1; EC:1.14; EC:1.14.14	Heme oxygenase (biliverdin-producing); Oxidoreductases; Acting on paired donors, with incorporation or reduction of molecular oxygen. The oxygen incorporated need not be derived from O(2); Acting on paired donors, with incorporation or reduction of molecular oxygen. The oxygen incorporated need not be derived from O(2)	-	-	-	K21480	Metabolic pathways; Biosynthesis of secondary metabolites;
HORVU.MOREX.r3.1HG0053110.1	7.21059	13.3885	54.5878	52.9412	32.032	10.2995	53.7645	5.22009	2.38408	0.0286833	0.196119	ubiquitin carboxyl-terminal hydrolase 36-like isoform X1	2544	20	0	87.54	3	F:GO:0004843; P:GO:0006511; P:GO:0016579	F:cysteine-type deubiquitinase activity; P:ubiquitin-dependent protein catabolic process; P:protein deubiquitination	EC:3.4; EC:3; EC:3.4.19.12	Acting on peptide bonds (peptidases); Hydrolases; Ubiquitinyl hydrolase 1	-	-	-	-	-
HORVU.MOREX.r3.1HG0059810.1	269.796	274.979	53.6302	54.5455	163.238	272.388	54.0878	0.198569	-2.33229	0.0033326	0.0456985	RNA-binding protein BRN1-like	1383	20	0	95.55	4	F:GO:0003729; C:GO:0005634; C:GO:0005737; C:GO:1990904	F:mRNA binding; C:nucleus; C:cytoplasm; C:ribonucleoprotein complex	-	-	-	-	-	-	-
HORVU.MOREX.r3.7HG0635480.1	0	2.05977	55.5455	52.9412	27.6366	1.02988	54.2434	52.6694	5.71889	6.63E-05	0.00207036	receptor-like protein kinase 7	681	20	6.99E-161	80.13	3	F:GO:0004672; F:GO:0005524; P:GO:0006468	F:protein kinase activity; F:ATP binding; P:protein phosphorylation	-	-	-	-	-	-	-
HORVU.MOREX.r3.3HG0243810.1	425.425	504.643	63.207	52.9412	261.554	465.034	58.0741	0.124881	-3.00137	0.000231912	0.00563568	protodermal factor 1-like	1047	20	9.13E-145	75.57	-	-	-	-	-	-	-	-	-	-
HORVU.MOREX.r3.1HG0084860.1	0.600883	4.11953	17.2383	30.4813	13.11	2.36021	23.8598	10.1092	3.3376	0.0464063	0.25755	neurogenic locus protein delta-like	837	20	1.05E-110	55.98	2	C:GO:0016020; C:GO:0016021	C:membrane; C:integral component of membrane	-	-	-	-	-	-	-
HORVU.MOREX.r3.3HG0304420.1	78.7156	109.168	12.4499	3.20856	50.8854	93.9416	7.82921	0.0833412	-3.58483	0.00135269	0.0229389	histone H4	312	20	4.12E-50	100	7	C:GO:0000786; F:GO:0003677; C:GO:0005634; P:GO:0006334; P:GO:0006352; P:GO:0009414; F:GO:0046982	C:nucleosome; F:DNA binding; C:nucleus; P:nucleosome assembly; P:DNA-templated transcription initiation; P:response to water deprivation; F:protein heterodimerization activity	-	-	-	-	-	K11254	-
HORVU.MOREX.r3.1HG0072220.1	0	0	13.4075	12.8342	6.56044	0	13.1209	Inf	Inf	0.0219018	0.166802	uncharacterized protein LOC123400624	1221	20	0	87.23	-	-	-	-	-	-	-	-	-	-
HORVU.MOREX.r3.7HG0746910.1	2.40353	1.02988	33.5188	27.2728	16.0563	1.71671	30.3958	17.7059	4.14616	0.0142374	0.127892	pentatricopeptide repeat-containing protein At4g15720-like	1788	20	0	93.04	1	F:GO:0008270	F:zinc ion binding	-	-	-	-	-	-	-
HORVU.MOREX.r3.7HG0652550.1	0	1.02988	60.3339	154.011	53.8437	0.514942	107.172	208.125	7.70131	4.17E-08	4.75E-06	predicted protein	774	20	5.76E-155	85.56	1	P:GO:0032196	P:transposition	-	-	-	-	-	-	-
HORVU.MOREX.r3.3HG0242080.1	0	1.02988	14.3652	20.8556	9.06268	0.514942	17.6104	34.1989	5.09588	0.0232352	0.173592	probable polygalacturonase At1g80170 isoform X2	537	20	5.41E-75	88.42	2	F:GO:0004650; P:GO:0005975	F:polygalacturonase activity; P:carbohydrate metabolic process	EC:3.2; EC:3; EC:3.2.1.15; EC:3.2.1	Glycosylases; Hydrolases; Polygalacturonase; Glycosylases	-	-	-	-	-
HORVU.MOREX.r3.7HG0645080.1	0	0	17.2383	46.5241	15.9406	0	31.8812	Inf	Inf	0.000689034	0.013502	leaf-specific thionin-like	507	20	1.39E-80	86.54	-	-	-	-	-	-	-	-	-	-
HORVU.MOREX.r3.1HG0031520.1	187.475	139.034	31.6035	48.1284	101.56	163.255	39.8659	0.244195	-2.0339	0.00971707	0.0982303	transcription factor MYB3R-4-like isoform X1	2514	20	0	89.76	4	F:GO:0000978; F:GO:0000981; C:GO:0005634; P:GO:0006357	F:RNA polymerase II cis-regulatory region sequence-specific DNA binding; F:DNA-binding transcription factor activity, RNA polymerase II-specific; C:nucleus; P:regulation of transcription by RNA polymerase II	-	-	-	-	-	-	-
HORVU.MOREX.r3.4HG0402720.1	5.40794	6.1793	44.0533	32.0856	21.9315	5.79362	38.0695	6.57093	2.7161	0.0362523	0.224085	protein CHROMATIN REMODELING 35-like	2913	20	0	90.31	4	F:GO:0005524; C:GO:0005634; P:GO:0080188; F:GO:0140658	F:ATP binding; C:nucleus; P:gene silencing by RNA-directed DNA methylation; F:ATP-dependent chromatin remodeler activity	-	-	-	-	-	K10875	Homologous recombination;
HORVU.MOREX.r3.5HG0479420.1	0	0	11.4922	25.6685	9.29016	0	18.5803	Inf	Inf	0.00849451	0.0894051	putative F-box protein At3g25750	1389	20	0	70.99	-	-	-	-	-	-	-	-	-	-
HORVU.MOREX.r3.7HG0658960.1	3.6053	26.777	56.5032	67.3797	38.5663	15.1911	61.9415	4.07748	2.02768	0.0325632	0.210718	transcription factor LRL3-like	1188	20	3.50E-154	83.63	5	F:GO:0000978; F:GO:0000981; C:GO:0005634; P:GO:0006357; F:GO:0046983	F:RNA polymerase II cis-regulatory region sequence-specific DNA binding; F:DNA-binding transcription factor activity, RNA polymerase II-specific; C:nucleus; P:regulation of transcription by RNA polymerase II; F:protein dimerization activity	-	-	-	-	-	-	-
HORVU.MOREX.r3.2HG0208230.1	0	0	11.4922	11.23	5.68053	0	11.3611	Inf	Inf	0.0331197	0.212742	B3 domain-containing protein	585	20	5.89E-113	95.72	-	-	-	-	-	-	-	-	-	-
HORVU.MOREX.r3.6HG0543920.1	0	0	11.4922	8.0214	4.87839	0	9.75679	Inf	Inf	0.0448392	0.252662	hypothetical protein ZWY2020_029357	576	20	1.81E-55	88.16	-	-	-	-	-	-	-	-	-	-
HORVU.MOREX.r3.7HG0659920.1	0	0	9.57681	22.4599	8.00918	0	16.0184	Inf	Inf	0.0146554	0.130172	putative RING-H2 finger protein ATL49	1293	20	0	82.24	4	C:GO:0016021; P:GO:0016567; F:GO:0031625; P:GO:0044260	C:integral component of membrane; P:protein ubiquitination; F:ubiquitin protein ligase binding; P:cellular macromolecule metabolic process	-	-	-	-	-	-	-
HORVU.MOREX.r3.6HG0575780.1	0	0	9.57681	41.7113	12.822	0	25.644	Inf	Inf	0.00255248	0.0375963	protein FAR1-RELATED SEQUENCE 3-like	1860	20	0	64.22	-	-	-	-	-	-	-	-	-	-
HORVU.MOREX.r3.5HG0479210.1	164.642	179.2	24.8997	22.4599	97.8003	171.921	23.6798	0.137737	-2.86001	0.0010356	0.018515	HMG-Y-related protein A-like	555	20	3.64E-57	86.49	8	C:GO:0000786; F:GO:0003690; C:GO:0005730; P:GO:0006334; P:GO:0006355; P:GO:0030261; F:GO:0031492; P:GO:0045910	C:nucleosome; F:double-stranded DNA binding; C:nucleolus; P:nucleosome assembly; P:regulation of DNA-templated transcription; P:chromosome condensation; F:nucleosomal DNA binding; P:negative regulation of DNA recombination	-	-	-	-	-	-	-
HORVU.MOREX.r3.6HG0587910.1	0	0	17.2383	44.9198	15.5395	0	31.079	Inf	Inf	0.000790983	0.0150215	hypothetical protein ZWY2020_032988, partial	774	20	2.06E-152	95.37	-	-	-	-	-	-	-	-	-	-
HORVU.MOREX.r3.3HG0222710.1	3.6053	5.14942	329.442	447.594	196.448	4.37736	388.518	88.7564	6.47178	3.65E-11	2.11E-08	predicted protein	747	20	8.11E-161	89.32	1	P:GO:0032196	P:transposition	-	-	-	-	-	-	-
HORVU.MOREX.r3.5HG0482500.1	1.20177	3.08965	72.7838	144.385	55.3651	2.14571	108.584	50.6054	5.66122	1.35E-06	8.35E-05	hypothetical protein ZWY2020_038741	360	20	1.18E-47	92.6	1	C:GO:0016021	C:integral component of membrane	-	-	-	-	-	-	-
HORVU.MOREX.r3.4HG0409720.1	1.80265	0	42.138	41.7113	21.413	0.901324	41.9246	46.5145	5.53961	0.00107156	0.0190852	NBS-LRR disease resistance protein	615	20	1.34E-74	75.01	1	C:GO:0016020	C:membrane	-	-	-	-	-	-	-
HORVU.MOREX.r3.3HG0223900.1	1.20177	0	13.4075	28.877	10.8716	0.600883	21.1423	35.1854	5.1369	0.0253924	0.183399	putative E3 ubiquitin-protein ligase SINA-like 6	897	20	1.81E-167	71.52	6	C:GO:0005737; P:GO:0006511; F:GO:0008270; P:GO:0016567; F:GO:0016740; F:GO:0046872	C:cytoplasm; P:ubiquitin-dependent protein catabolic process; F:zinc ion binding; P:protein ubiquitination; F:transferase activity; F:metal ion binding	-	-	-	-	-	K04506	Ubiquitin mediated proteolysis; p53 signaling pathway;
HORVU.MOREX.r3.6HG0570180.1	0	0	12.4499	12.8342	6.32102	0	12.642	Inf	Inf	0.0249225	0.1812	predicted protein	693	20	5.04E-131	88.88	1	P:GO:0032196	P:transposition	-	-	-	-	-	-	-
HORVU.MOREX.r3.5HG0519300.1	0	0	10.5345	11.23	5.44111	0	10.8822	Inf	Inf	0.0377099	0.229149	zinc finger MYM-type protein 1-like	273	20	9.88E-46	93.5	1	F:GO:0046983	F:protein dimerization activity	-	-	-	-	-	-	-
HORVU.MOREX.r3.7HG0637400.1	4.80706	4.11953	32.5612	51.3369	23.2062	4.4633	41.9491	9.39867	3.23246	0.0210792	0.163314	haloacid dehalogenase-like hydrolase domain-containing protein Sgpp	765	20	1.99E-169	89.42	-	-	-	-	-	-	-	-	-	-
HORVU.MOREX.r3.2HG0096330.1	1.20177	0	26.8151	27.2728	13.8224	0.600883	27.0439	45.007	5.49208	0.00735034	0.0805983	(E)-beta-caryophyllene synthase-like	1650	20	0	85.28	3	F:GO:0000287; F:GO:0010333; P:GO:0016102	F:magnesium ion binding; F:terpene synthase activity; P:diterpenoid biosynthetic process	EC:4.2; EC:4; EC:4.2.3	Carbon-oxygen lyases; Lyases; Carbon-oxygen lyases	-	-	-	-	-
HORVU.MOREX.r3.2HG0174440.1	0	0	95.7681	104.278	50.0116	0	100.023	Inf	Inf	7.11E-09	1.10E-06	heavy metal-associated isoprenylated plant protein 16-like	333	20	9.30E-39	98.65	-	-	-	-	-	-	-	-	-	-
HORVU.MOREX.r3.2HG0146720.1	0.600883	0	47.8841	81.8183	32.5758	0.300441	64.8512	215.853	7.75391	6.93E-06	0.000320007	L10-interacting MYB domain-containing protein-like	1074	20	0	93.22	-	-	-	-	-	-	-	-	-	-
HORVU.MOREX.r3.3HG0297010.1	2.40353	2.05977	61.2916	68.984	33.6847	2.23165	65.1378	29.1882	4.86731	0.000185068	0.00475857	mutator protein	930	20	0	94.1	-	-	-	-	-	-	-	-	-	-
HORVU.MOREX.r3.4HG0416060.1	1.20177	0	16.2806	25.6685	10.7877	0.600883	20.9745	34.9062	5.12541	0.0237221	0.175497	protein SMAX1-LIKE 3-like	804	20	0	81.53	-	-	-	-	-	-	-	-	-	-
HORVU.MOREX.r3.5HG0447910.1	0	2.05977	23.942	49.7327	18.9336	1.02988	36.8374	35.7685	5.16062	0.00187808	0.0297773	predicted protein	651	20	3.74E-139	72.61	3	F:GO:0003676; F:GO:0008408; P:GO:0090305	F:nucleic acid binding; F:3'-5' exonuclease activity; P:nucleic acid phosphodiester bond hydrolysis	EC:3.1; EC:3	Acting on ester bonds; Hydrolases	-	-	-	-	-
HORVU.MOREX.r3.2HG0110200.1	3.00441	5.14942	81.4029	137.968	56.8812	4.07692	109.685	26.904	4.74975	1.32E-05	0.000540367	hypothetical protein ZWY2020_054565	576	20	3.63E-58	88.17	-	-	-	-	-	-	-	-	-	-
HORVU.MOREX.r3.3HG0306100.1	3.00441	4.11953	26.8151	41.7113	18.9126	3.56197	34.2632	9.61915	3.26591	0.0295202	0.199305	hypothetical protein TRIUR3_25067	210	1	7.49E-07	81.16	-	-	-	-	-	-	-	-	-	-
HORVU.MOREX.r3.7HG0726570.1	0	0	5.74609	28.877	8.65578	0	17.3116	Inf	Inf	0.0133264	0.122463	transcription factor RAX2-like	783	20	3.44E-161	89.5	1	F:GO:0003677	F:DNA binding	-	-	-	-	-	-	-
HORVU.MOREX.r3.2HG0098620.1	0	0	45.011	88.2354	33.3116	0	66.6232	Inf	Inf	1.17E-06	7.50E-05	disease resistance protein RGA5-like isoform X1	4635	20	0	79.07	2	P:GO:0006952; F:GO:0043531	P:defense response; F:ADP binding	-	-	-	-	-	-	-
HORVU.MOREX.r3.7HG0652410.1	0	0	4.78841	20.8556	6.41101	0	12.822	Inf	Inf	0.0328916	0.211934	B3 domain-containing protein	579	20	3.18E-100	92.31	-	-	-	-	-	-	-	-	-	-
HORVU.MOREX.r3.7HG0667350.1	1.20177	0	74.6991	81.8183	39.4298	0.600883	78.2587	130.24	7.02502	2.38E-06	0.000132229	predicted protein	660	20	4.98E-112	81.91	1	P:GO:0032196	P:transposition	-	-	-	-	-	-	-
HORVU.MOREX.r3.3HG0304620.1	0	0	17.2383	12.8342	7.51813	0	15.0363	Inf	Inf	0.013271	0.122332	zinc finger MYM-type protein 1-like	549	20	2.65E-104	85.5	1	F:GO:0046983	F:protein dimerization activity	-	-	-	-	-	-	-
HORVU.MOREX.r3.6HG0548460.1	63.6935	81.3608	15.3229	9.62568	42.5007	72.5272	12.4743	0.171995	-2.53956	0.0211409	0.163556	histone H4	312	20	4.12E-50	100	7	C:GO:0000786; F:GO:0003677; C:GO:0005634; P:GO:0006334; P:GO:0006352; P:GO:0009414; F:GO:0046982	C:nucleosome; F:DNA binding; C:nucleus; P:nucleosome assembly; P:DNA-templated transcription initiation; P:response to water deprivation; F:protein heterodimerization activity	-	-	-	-	-	K11254	-
HORVU.MOREX.r3.1HG0034340.1	0	0	47.8841	72.1926	30.0192	0	60.0383	Inf	Inf	2.78E-06	0.000148362	predicted protein	693	20	6.71E-144	87.77	1	P:GO:0032196	P:transposition	-	-	-	-	-	-	-
HORVU.MOREX.r3.4HG0331430.1	0.600883	1.02988	15.3229	24.0642	10.2545	0.815383	19.6935	24.1525	4.5941	0.0291807	0.19801	---NA---	312	-	-	-	-	-	-	-	-	-	-	-	-	-
HORVU.MOREX.r3.3HG0231540.1	16.8247	16.4781	832.225	1455.08	580.152	16.6514	1143.65	68.682	6.10186	3.74E-10	1.08E-07	KIN17-like protein	1242	20	0	83.69	4	F:GO:0003690; C:GO:0005634; P:GO:0006260; P:GO:0006974	F:double-stranded DNA binding; C:nucleus; P:DNA replication; P:cellular response to DNA damage stimulus	-	-	-	-	-	-	-
HORVU.MOREX.r3.4HG0361620.1	0.600883	0	60.3339	88.2354	37.2925	0.300441	74.2847	247.252	7.94984	1.61E-06	9.57E-05	hypothetical protein ZWY2020_032988, partial	705	20	1.86E-134	93.43	-	-	-	-	-	-	-	-	-	-
HORVU.MOREX.r3.5HG0502380.1	1.80265	0	30.6458	40.107	18.1389	0.901324	35.3764	39.2494	5.2946	0.00361871	0.0485364	retrotransposon protein, putative, Ty1-copia subclass	276	20	1.09E-45	95.62	5	F:GO:0003676; F:GO:0003964; P:GO:0006278; F:GO:0008270; P:GO:0015074	F:nucleic acid binding; F:RNA-directed DNA polymerase activity; P:RNA-templated DNA biosynthetic process; F:zinc ion binding; P:DNA integration	EC:2.7; EC:2; EC:2.7.7.49; EC:2.7.7	Transferring phosphorus-containing groups; Transferases; RNA-directed DNA polymerase; Transferring phosphorus-containing groups	-	-	-	-	-
HORVU.MOREX.r3.5HG0510010.1	79.3165	96.8091	17.2383	19.2514	53.1538	88.0628	18.2448	0.20718	-2.27105	0.0198191	0.157158	protein ECERIFERUM 26-like	1371	20	0	90.03	1	F:GO:0050734	F:hydroxycinnamoyltransferase activity	EC:2.3; EC:2; EC:2.3.1	Acyltransferases; Transferases; Acyltransferases	-	-	-	-	-
HORVU.MOREX.r3.1HG0082210.1	2.40353	1.02988	36.3919	64.1712	25.9991	1.71671	50.2815	29.2895	4.87231	0.00112354	0.0198697	Alternative oxidase 1a, mitochondrial	1548	20	0	82.56	-	-	-	-	-	-	-	-	-	-
HORVU.MOREX.r3.4HG0370250.1	0	0	11.4922	17.6471	7.28481	0	14.5696	Inf	Inf	0.0178658	0.147264	hypothetical protein ZWY2020_021451, partial	774	20	1.07E-153	95.8	-	-	-	-	-	-	-	-	-	-
HORVU.MOREX.r3.7HG0636780.1	15.0221	23.6873	59.3762	104.278	50.591	19.3547	81.8272	4.22777	2.0799	0.0375614	0.228915	putative disease resistance protein RGA3	4182	20	0	80.41	2	P:GO:0006952; F:GO:0043531	P:defense response; F:ADP binding	-	-	-	-	-	-	-
HORVU.MOREX.r3.5HG0431170.1	0	0	16.2806	24.0642	10.0862	0	20.1724	Inf	Inf	0.00536931	0.0646172	probable glucan 1,3-beta-glucosidase A	1446	20	0	94.4	4	P:GO:0005975; P:GO:0007015; F:GO:0016985; F:GO:0051015	P:carbohydrate metabolic process; P:actin filament organization; F:mannan endo-1,4-beta-mannosidase activity; F:actin filament binding	EC:3.2; EC:3; EC:3.2.1.25; EC:3.2.1.78; EC:3.2.1	Glycosylases; Hydrolases; Beta-mannosidase; Mannan endo-1,4-beta-mannosidase; Glycosylases	-	-	-	-	-
HORVU.MOREX.r3.1HG0068460.1	30.645	40.1655	1.91536	6.41712	19.7857	35.4052	4.16624	0.117673	-3.08714	0.0276617	0.192437	high molecular mass early light-inducible protein HV58, chloroplastic-like	582	20	3.98E-86	90.43	2	C:GO:0009535; C:GO:0016021	C:chloroplast thylakoid membrane; C:integral component of membrane	-	-	-	-	-	-	-
HORVU.MOREX.r3.2HG0101320.1	4.20618	0	76.6145	178.075	64.7239	2.10309	127.345	60.5513	5.92009	9.38E-07	6.31E-05	retrotransposon protein, putative, unclassified	669	20	9.64E-124	80.9	6	F:GO:0003676; F:GO:0003964; F:GO:0004523; P:GO:0006278; F:GO:0008270; P:GO:0090502	F:nucleic acid binding; F:RNA-directed DNA polymerase activity; F:RNA-DNA hybrid ribonuclease activity; P:RNA-templated DNA biosynthetic process; F:zinc ion binding; P:RNA phosphodiester bond hydrolysis, endonucleolytic	EC:3.1.30; EC:3.1; EC:2.7; EC:2; EC:3; EC:2.7.7.49; EC:3.1.26; EC:2.7.7; EC:3.1.26.4	Acting on ester bonds; Acting on ester bonds; Transferring phosphorus-containing groups; Transferases; Hydrolases; RNA-directed DNA polymerase; Acting on ester bonds; Transferring phosphorus-containing groups; Ribonuclease H	-	-	-	-	-
HORVU.MOREX.r3.7HG0637770.1	1.20177	0	10.5345	30.4813	10.5544	0.600883	20.5079	34.1296	5.09295	0.0306389	0.203852	hypothetical protein ZWY2020_059905	357	20	3.54E-34	95.72	-	-	-	-	-	-	-	-	-	-
HORVU.MOREX.r3.7HG0750920.1	1.20177	2.05977	27.7728	54.5455	21.3949	1.63077	41.1591	25.2391	4.65759	0.00281321	0.0405614	putative disease resistance protein RGA3	2511	20	0	68.09	2	P:GO:0006952; F:GO:0043531	P:defense response; F:ADP binding	-	-	-	-	-	-	-
HORVU.MOREX.r3.3HG0323820.1	0	0	32.5612	35.2942	16.9638	0	33.9277	Inf	Inf	0.000311517	0.00710998	Elongation factor 1-alpha	723	20	2.71E-146	73.96	1	F:GO:0003824	F:catalytic activity	-	-	-	-	-	-	-
HORVU.MOREX.r3.3HG0283540.1	0	0	20.1113	20.8556	10.2417	0	20.4835	Inf	Inf	0.00447201	0.0567427	Chloride channel protein CLC-e	441	20	1.31E-104	89.78	-	-	-	-	-	-	-	-	-	-
HORVU.MOREX.r3.2HG0099870.1	269.796	250.262	7214.21	5435.3	3292.39	260.029	6324.76	24.3233	4.60427	3.99E-05	0.00135545	heat shock protein 90	2151	20	0	96.28	10	F:GO:0005524; C:GO:0005829; C:GO:0005886; P:GO:0006457; F:GO:0016887; C:GO:0032991; P:GO:0034605; C:GO:0048471; P:GO:0050821; F:GO:0051082	F:ATP binding; C:cytosol; C:plasma membrane; P:protein folding; F:ATP hydrolysis activity; C:protein-containing complex; P:cellular response to heat; C:perinuclear region of cytoplasm; P:protein stabilization; F:unfolded protein binding	EC:3.6.1; EC:3.6; EC:3; EC:3.6.1.15	Acting on acid anhydrides; Acting on acid anhydrides; Hydrolases; Nucleoside-triphosphate phosphatase	-	-	-	K04079	Necroptosis; Antigen processing and presentation; Plant-pathogen interaction; Chemical carcinogenesis - receptor activation; Salmonella infection;
HORVU.MOREX.r3.2HG0106190.1	0	2.05977	24.8997	14.4385	10.3495	1.02988	19.6691	19.0984	4.25538	0.0214195	0.16482	probable cystathionine gamma-synthase 2	1371	20	0	92.96	4	F:GO:0003962; P:GO:0009086; P:GO:0019346; F:GO:0030170	F:cystathionine gamma-synthase activity; P:methionine biosynthetic process; P:transsulfuration; F:pyridoxal phosphate binding	EC:2.5.1; EC:2.5.1.48; EC:2	Transferring alkyl or aryl groups, other than methyl groups; Cystathionine gamma-synthase; Transferases	-	-	-	K01739	Metabolic pathways; Biosynthesis of secondary metabolites; Biosynthesis of amino acids; Sulfur metabolism; Cysteine and methionine metabolism;
HORVU.MOREX.r3.7HG0714560.1	19.8291	18.5379	110.133	165.241	78.4353	19.1835	137.687	7.17736	2.84345	0.00216289	0.0331452	non-ltr retroelement reverse transcriptase	1038	20	1.26E-111	64.14	1	F:GO:0016787	F:hydrolase activity	EC:3	Hydrolases	-	-	-	-	-
HORVU.MOREX.r3.2HG0145470.1	6.60971	5.14942	70.8684	133.155	53.9457	5.87956	102.012	17.3502	4.11688	0.000181644	0.00468716	Cytokinin-O-glucosyltransferase 2	1587	20	0	87.46	-	-	-	-	-	-	-	-	-	-
HORVU.MOREX.r3.1HG0016660.1	0	0	11.4922	27.2728	9.69123	0	19.3825	Inf	Inf	0.00732051	0.0803651	F-box protein At5g07610-like	1185	20	0	80.79	-	-	-	-	-	-	-	-	-	-
HORVU.MOREX.r3.7HG0663350.1	1.20177	3.08965	33.5188	56.1498	23.49	2.14571	44.8343	20.8949	4.38508	0.00231012	0.0348467	Auxin-induced protein 5NG4	408	20	2.55E-95	98.56	-	-	-	-	-	-	-	-	-	-
HORVU.MOREX.r3.7HG0672010.1	0	0	3.83073	27.2728	7.77587	0	15.5517	Inf	Inf	0.0200609	0.158532	serine/threonine-protein phosphatase 7	546	20	5.04E-123	95.9	1	P:GO:0010073	P:meristem maintenance	-	-	-	-	-	-	-
HORVU.MOREX.r3.1HG0073680.1	0	0	15.3229	28.877	11.05	0	22.1	Inf	Inf	0.00391657	0.0513076	L10-interacting MYB domain-containing protein-like	885	20	0	73.81	-	-	-	-	-	-	-	-	-	-
HORVU.MOREX.r3.7HG0691040.1	0	0	11.4922	12.8342	6.0816	0	12.1632	Inf	Inf	0.0283886	0.194901	hypothetical protein ZWY2020_035460	387	20	1.31E-40	70.43	1	C:GO:0016021	C:integral component of membrane	-	-	-	-	-	-	-
HORVU.MOREX.r3.5HG0431300.1	0	0	12.4499	17.6471	7.52423	0	15.0485	Inf	Inf	0.0157559	0.136555	hypothetical protein ZWY2020_018936	357	20	2.20E-28	93.67	-	-	-	-	-	-	-	-	-	-
HORVU.MOREX.r3.7HG0743420.1	3.6053	0	30.6458	28.877	15.782	1.80265	29.7614	16.5098	4.04525	0.0223034	0.1691	putative aldehyde oxidase-like protein isoform X1	4038	20	0	93.21	4	F:GO:0005506; F:GO:0016491; F:GO:0051537; F:GO:0071949	F:iron ion binding; F:oxidoreductase activity; F:2 iron, 2 sulfur cluster binding; F:FAD binding	EC:1	Oxidoreductases	-	-	-	K09842	Metabolic pathways; Biosynthesis of secondary metabolites; Carotenoid biosynthesis;
HORVU.MOREX.r3.5HG0536690.1	3.6053	0	56.5032	117.112	44.3052	1.80265	86.8078	48.1557	5.58964	2.52E-05	0.000920837	stress response protein NST1-like	447	20	9.88E-33	87.07	-	-	-	-	-	-	-	-	-	-
HORVU.MOREX.r3.7HG0667800.1	2.40353	0	42.138	105.882	37.606	1.20177	74.0102	61.5846	5.9445	3.86E-05	0.00132079	hypothetical protein ZWY2020_050528	1023	20	7.23E-157	68	-	-	-	-	-	-	-	-	-	-
HORVU.MOREX.r3.2HG0132050.1	14.4212	18.5379	119.71	216.578	92.3118	16.4795	168.144	10.2032	3.35095	0.000240546	0.00578558	putative F-box protein At2g02030	1326	20	0	81.22	-	-	-	-	-	-	-	-	-	-
HORVU.MOREX.r3.3HG0280270.1	0	0	7.66145	17.6471	6.32713	0	12.6543	Inf	Inf	0.0301232	0.201313	hypothetical protein ZWY2020_021451, partial	774	20	1.01E-151	95.22	-	-	-	-	-	-	-	-	-	-
HORVU.MOREX.r3.7HG0733690.1	0	0	4.78841	19.2514	6.00994	0	12.0199	Inf	Inf	0.0386167	0.23209	B3 domain-containing protein	381	20	8.52E-80	91.5	-	-	-	-	-	-	-	-	-	-
HORVU.MOREX.r3.1HG0068010.1	177.26	247.172	53.6302	49.7327	131.949	212.216	51.6814	0.243532	-2.03782	0.0133573	0.122594	peroxidase 1-like	981	20	0	96.12	8	F:GO:0004601; C:GO:0005576; P:GO:0006979; C:GO:0009505; F:GO:0020037; P:GO:0042744; F:GO:0046872; P:GO:0098869	F:peroxidase activity; C:extracellular region; P:response to oxidative stress; C:plant-type cell wall; F:heme binding; P:hydrogen peroxide catabolic process; F:metal ion binding; P:cellular oxidant detoxification	EC:1.11; EC:1; EC:1.11.1	Acting on a peroxide as acceptor; Oxidoreductases; Acting on a peroxide as acceptor	-	-	-	K00430	Metabolic pathways; Biosynthesis of secondary metabolites; Phenylpropanoid biosynthesis;
HORVU.MOREX.r3.2HG0099060.1	187.475	289.397	25.8574	6.41712	127.287	238.436	16.1373	0.0676795	-3.88514	2.84E-05	0.00102045	chalcone synthase 2-like	1185	20	0	99.77	4	P:GO:0009813; F:GO:0016210; P:GO:0030639; F:GO:0102128	P:flavonoid biosynthetic process; F:naringenin-chalcone synthase activity; P:polyketide biosynthetic process; F:chalcone synthase activity	EC:2.3.1.74; EC:2.3; EC:2; EC:2.3.1	Chalcone synthase; Acyltransferases; Transferases; Acyltransferases	-	-	-	K00660	Metabolic pathways; Biosynthesis of secondary metabolites; Flavonoid biosynthesis; Tropane, piperidine and pyridine alkaloid biosynthesis; Circadian rhythm - plant;
HORVU.MOREX.r3.5HG0485890.1	2.40353	6.1793	74.6991	60.9626	36.0612	4.29142	67.8309	15.8062	3.98242	0.0004646	0.00985671	putative F-box/LRR-repeat protein At5g02700	1440	20	0	78.68	-	-	-	-	-	-	-	-	-	-
HORVU.MOREX.r3.6HG0559530.1	1.20177	2.05977	19.1536	44.9198	16.8337	1.63077	32.0367	19.6452	4.29611	0.0118863	0.113181	putative homeobox-leucine zipper protein HOX26	594	20	6.19E-93	85.05	4	F:GO:0000981; C:GO:0005634; P:GO:0006357; F:GO:0043565	F:DNA-binding transcription factor activity, RNA polymerase II-specific; C:nucleus; P:regulation of transcription by RNA polymerase II; F:sequence-specific DNA binding	-	-	-	-	-	-	-
HORVU.MOREX.r3.4HG0395860.1	0	0	18.1959	28.877	11.7682	0	23.5365	Inf	Inf	0.00277235	0.0400955	hypothetical protein ZWY2020_007687	801	20	0	91.2	-	-	-	-	-	-	-	-	-	-
HORVU.MOREX.r3.7HG0635350.1	200.695	218.335	43.0957	32.0856	123.553	209.515	37.5906	0.179417	-2.47861	0.00322928	0.0447228	E3 ubiquitin-protein ligase WAV3-like	1566	20	0	90.21	-	-	-	-	-	-	-	-	-	-
HORVU.MOREX.r3.6HG0565240.1	4.80706	2.05977	56.5032	75.4011	34.6928	3.43341	65.9522	19.2089	4.2637	0.000822288	0.015514	protein FAR1-RELATED SEQUENCE 5-like	1755	20	0	83.82	3	C:GO:0005634; P:GO:0006355; F:GO:0008270	C:nucleus; P:regulation of DNA-templated transcription; F:zinc ion binding	-	-	-	-	-	-	-
HORVU.MOREX.r3.6HG0627350.1	1.20177	0	19.1536	16.0428	9.09955	0.600883	17.5982	29.2873	4.8722	0.0354099	0.221061	hypothetical protein ZWY2020_023407	2781	20	0	95.15	1	C:GO:0016021	C:integral component of membrane	-	-	-	-	-	-	-
HORVU.MOREX.r3.3HG0297690.1	753.507	932.045	128.329	59.3583	468.31	842.776	93.8438	0.111351	-3.16682	0.000218222	0.00538851	non-specific lipid-transfer protein 2B-like	366	20	2.79E-61	91.74	2	P:GO:0006869; F:GO:0008289	P:lipid transport; F:lipid binding	-	-	-	-	-	-	-
HORVU.MOREX.r3.3HG0226060.1	114.168	108.138	37.3496	16.0428	68.9245	111.153	26.6962	0.240176	-2.05784	0.0319923	0.209187	probable calcium-binding protein CML16	561	20	2.47E-115	92.27	1	F:GO:0005509	F:calcium ion binding	-	-	-	-	-	K13448	Plant-pathogen interaction;
HORVU.MOREX.r3.2HG0107060.1	0	2.05977	17.2383	38.5027	14.4502	1.02988	27.8705	27.0618	4.75819	0.00845833	0.0892797	IAA-amino acid hydrolase ILR1-like 8	1290	20	0	94.38	2	P:GO:0009850; F:GO:0010179	P:auxin metabolic process; F:IAA-Ala conjugate hydrolase activity	EC:3.5; EC:3	Acting on carbon-nitrogen bonds, other than peptide bonds; Hydrolases	-	-	-	-	-
HORVU.MOREX.r3.7HG0713680.1	0	0	9.57681	11.23	5.20169	0	10.4034	Inf	Inf	0.0429817	0.246587	GDSL esterase/lipase At5g22810-like	1230	20	0	87.25	1	F:GO:0016788	F:hydrolase activity, acting on ester bonds	EC:3.1; EC:3	Acting on ester bonds; Hydrolases	-	-	-	-	-
HORVU.MOREX.r3.4HG0416690.1	3.6053	1.02988	73.7415	117.112	48.8723	2.31759	95.4269	41.1751	5.3637	1.34E-05	0.000548486	zinc finger MYM-type protein 1-like	2268	20	0	78.01	1	F:GO:0046983	F:protein dimerization activity	-	-	-	-	-	-	-
HORVU.MOREX.r3.6HG0633710.1	6.60971	2.05977	38.3073	30.4813	19.3645	4.33474	34.3943	7.93457	2.98815	0.0439385	0.250026	chitin elicitor receptor kinase 1-like	657	20	9.62E-145	86.79	7	F:GO:0004674; F:GO:0005524; C:GO:0005886; P:GO:0006468; C:GO:0016021; F:GO:0019199; P:GO:0045087	F:protein serine/threonine kinase activity; F:ATP binding; C:plasma membrane; P:protein phosphorylation; C:integral component of membrane; F:transmembrane receptor protein kinase activity; P:innate immune response	EC:2.7.1; EC:2.7; EC:2	Transferring phosphorus-containing groups; Transferring phosphorus-containing groups; Transferases	-	-	-	K13429	Plant-pathogen interaction;
HORVU.MOREX.r3.2HG0106430.1	250.568	266.74	2849.1	3136.37	1625.69	258.654	2992.73	11.5704	3.53237	0.000266678	0.00627346	cytosolic sulfotransferase 5-like	1017	20	0	91.21	1	F:GO:0008146	F:sulfotransferase activity	EC:2.8.2; EC:2; EC:2.8	Transferring sulfur-containing groups; Transferases; Transferring sulfur-containing groups	-	-	-	-	-
HORVU.MOREX.r3.1HG0039460.1	0	0	58.4186	68.984	31.8506	0	63.7013	Inf	Inf	1.28E-06	7.97E-05	Nuclear-like sequence	417	6	2.67E-31	88.5	2	C:GO:0005739; C:GO:0016021	C:mitochondrion; C:integral component of membrane	-	-	-	-	-	-	-
HORVU.MOREX.r3.7HG0695390.1	1.80265	0	17.2383	22.4599	10.3752	0.901324	19.8491	22.0222	4.46088	0.0415779	0.242667	putative NOT transcription complex subunit VIP2	309	20	1.90E-53	86.32	-	-	-	-	-	-	-	-	-	-
HORVU.MOREX.r3.6HG0602250.1	3.6053	4.11953	32.5612	60.9626	25.3122	3.86241	46.7619	12.1069	3.59776	0.00876375	0.0914951	NDR1/HIN1-like protein 2	588	20	4.83E-112	81.71	3	C:GO:0009506; C:GO:0016021; C:GO:0046658	C:plasmodesma; C:integral component of membrane; C:anchored component of plasma membrane	-	-	-	-	-	-	-
HORVU.MOREX.r3.2HG0215380.1	5.40794	18.5379	76.6145	136.364	59.231	11.9729	106.489	8.89416	3.15286	0.000993113	0.0179434	Lactation elevated protein 1	564	20	1.80E-76	92.48	-	-	-	-	-	-	-	-	-	-
HORVU.MOREX.r3.7HG0710990.1	0	0	8.61913	20.8556	7.36869	0	14.7374	Inf	Inf	0.019336	0.15489	hypothetical protein ZWY2020_045646	591	20	5.07E-91	95.61	-	-	-	-	-	-	-	-	-	-
HORVU.MOREX.r3.2HG0175220.1	1028.11	1007.23	252.828	186.096	618.565	1017.67	219.462	0.215652	-2.21322	0.0073084	0.0803651	copper methylamine oxidase-like	2322	20	0	97.59	7	F:GO:0005507; F:GO:0008131; P:GO:0009308; F:GO:0048038; F:GO:0052593; F:GO:0052594; F:GO:0052596	F:copper ion binding; F:primary amine oxidase activity; P:amine metabolic process; F:quinone binding; F:tryptamine:oxygen oxidoreductase (deaminating) activity; F:aminoacetone:oxygen oxidoreductase(deaminating) activity; F:phenethylamine:oxygen oxidoreductase (deaminating) activity	EC:1.4; EC:1.4.3; EC:1; EC:1.4.3.21	Acting on the CH-NH(2) group of donors; Acting on the CH-NH(2) group of donors; Oxidoreductases; Primary-amine oxidase	-	-	-	K00276	Metabolic pathways; Biosynthesis of secondary metabolites; Glycine, serine and threonine metabolism; Tyrosine metabolism; Phenylalanine metabolism; beta-Alanine metabolism; Isoquinoline alkaloid biosynthesis; Tropane, piperidine and pyridine alkaloid biosynthesis;
HORVU.MOREX.r3.7HG0728710.1	1090	1190.55	218.351	202.139	675.259	1140.27	210.245	0.184382	-2.43923	0.00314574	0.0438732	probable xyloglucan endotransglucosylase/hydrolase protein 23	879	20	0	96.21	6	F:GO:0004553; P:GO:0010411; F:GO:0016762; P:GO:0042546; C:GO:0048046; P:GO:0071555	F:hydrolase activity, hydrolyzing O-glycosyl compounds; P:xyloglucan metabolic process; F:xyloglucan:xyloglucosyl transferase activity; P:cell wall biogenesis; C:apoplast; P:cell wall organization	EC:3.2; EC:2.4.1.207; EC:2.4; EC:2; EC:3; EC:2.4.1; EC:3.2.1	Glycosylases; Xyloglucan:xyloglucosyl transferase; Glycosyltransferases; Transferases; Hydrolases; Glycosyltransferases; Glycosylases	-	-	-	-	-
HORVU.MOREX.r3.1HG0068370.1	38.4565	49.4344	4.78841	0	23.1698	43.9454	2.3942	0.0544813	-4.1981	0.00759281	0.0825612	histone H4	312	20	4.12E-50	100	7	C:GO:0000786; F:GO:0003677; C:GO:0005634; P:GO:0006334; P:GO:0006352; P:GO:0009414; F:GO:0046982	C:nucleosome; F:DNA binding; C:nucleus; P:nucleosome assembly; P:DNA-templated transcription initiation; P:response to water deprivation; F:protein heterodimerization activity	-	-	-	-	-	K11254	-
HORVU.MOREX.r3.5HG0437840.1	0	2.05977	19.1536	14.4385	8.91298	1.02988	16.7961	16.3087	4.02757	0.0389493	0.233379	FBD-associated F-box protein At5g60610-like	1446	20	0	96.35	-	-	-	-	-	-	-	-	-	-
HORVU.MOREX.r3.4HG0411090.1	8.41236	8.23907	68.9531	165.241	62.7113	8.32571	117.097	14.0645	3.81399	0.000261778	0.00620076	putative DBINO protein	312	20	1.20E-59	94.23	-	-	-	-	-	-	-	-	-	-
HORVU.MOREX.r3.1HG0053080.1	0	0	36.3919	48.1284	21.1301	0	42.2601	Inf	Inf	6.53E-05	0.00204427	D-3-phosphoglycerate dehydrogenase, chloroplastic	1134	20	0	88.55	-	-	-	-	-	-	-	-	-	-
HORVU.MOREX.r3.3HG0233220.1	0	0	19.1536	32.0856	12.8098	0	25.6196	Inf	Inf	0.0018816	0.0297871	predicted protein	693	20	7.59E-133	88.55	1	P:GO:0032196	P:transposition	-	-	-	-	-	-	-
HORVU.MOREX.r3.5HG0519060.1	0	0	8.61913	14.4385	5.76441	0	11.5288	Inf	Inf	0.0360926	0.223466	putative B3 domain-containing protein Os08g0325100	921	20	0	77.09	2	F:GO:0003677; C:GO:0005634	F:DNA binding; C:nucleus	-	-	-	-	-	-	-
HORVU.MOREX.r3.3HG0227400.1	1252.24	1295.59	160.89	120.321	707.261	1273.92	140.606	0.110373	-3.17954	0.000213762	0.00531503	non-specific lipid-transfer protein 4.3-like	348	20	4.12E-43	96.74	2	P:GO:0006869; F:GO:0008289	P:lipid transport; F:lipid binding	-	-	-	-	-	-	-
HORVU.MOREX.r3.2HG0184170.1	0	0	9.57681	16.0428	6.4049	0	12.8098	Inf	Inf	0.0270218	0.189845	hypothetical protein ZWY2020_000612	927	20	1.71E-137	67.64	-	-	-	-	-	-	-	-	-	-
HORVU.MOREX.r3.5HG0476870.1	1.80265	0	16.2806	51.3369	17.355	0.901324	33.8088	37.5101	5.22921	0.00667432	0.0754326	predicted protein	1377	20	0	90.63	-	-	-	-	-	-	-	-	-	-
HORVU.MOREX.r3.6HG0613610.1	2.40353	6.1793	38.3073	67.3797	28.5675	4.29142	52.8435	12.3138	3.6222	0.00413417	0.0534864	NAC domain-containing protein 71-like	1911	20	0	72.97	3	F:GO:0003677; C:GO:0005634; P:GO:0006355	F:DNA binding; C:nucleus; P:regulation of DNA-templated transcription	-	-	-	-	-	-	-
HORVU.MOREX.r3.1HG0042620.1	0	0	7.66145	12.8342	5.12392	0	10.2478	Inf	Inf	0.0481216	0.26223	polyubiquitin-like	1017	20	0	85.15	6	C:GO:0005634; C:GO:0005737; P:GO:0016567; P:GO:0019941; F:GO:0031386; F:GO:0031625	C:nucleus; C:cytoplasm; P:protein ubiquitination; P:modification-dependent protein catabolic process; F:protein tag; F:ubiquitin protein ligase binding	-	-	-	-	-	-	-
HORVU.MOREX.r3.1HG0067710.1	0	0	7.66145	25.6685	8.33248	0	16.665	Inf	Inf	0.0139747	0.126125	probable potassium transporter 3	2439	20	0	94.46	3	F:GO:0015079; C:GO:0016021; P:GO:0071805	F:potassium ion transmembrane transporter activity; C:integral component of membrane; P:potassium ion transmembrane transport	EC:7	n/a	-	-	-	-	-
HORVU.MOREX.r3.3HG0322680.1	0	2.05977	15.3229	46.5241	15.9767	1.02988	30.9235	30.0262	4.90815	0.00578012	0.0679658	hypothetical protein ZWY2020_026566	1224	20	0	75.93	-	-	-	-	-	-	-	-	-	-
HORVU.MOREX.r3.5HG0528620.1	0	2.05977	23.942	19.2514	11.3133	1.02988	21.5967	20.97	4.39026	0.0167343	0.141986	predicted protein	597	20	5.54E-94	79.75	2	F:GO:0004857; P:GO:0043086	F:enzyme inhibitor activity; P:negative regulation of catalytic activity	-	-	-	-	-	-	-
HORVU.MOREX.r3.5HG0535350.1	0	0	9.57681	20.8556	7.60811	0	15.2162	Inf	Inf	0.017022	0.142973	stearoyl-[acyl-carrier-protein] 9-desaturase 5, chloroplastic-like	1176	20	0	93.76	4	P:GO:0006633; C:GO:0009507; F:GO:0045300; F:GO:0046872	P:fatty acid biosynthetic process; C:chloroplast; F:acyl-[acyl-carrier-protein] desaturase activity; F:metal ion binding	EC:1.14.19.2; EC:1; EC:1.14; EC:1.14.19	Stearoyl-[acyl-carrier-protein] 9-desaturase; Oxidoreductases; Acting on paired donors, with incorporation or reduction of molecular oxygen. The oxygen incorporated need not be derived from O(2); Acting on paired donors, with incorporation or reduction of molecular oxygen. The oxygen incorporated need not be derived from O(2)	-	-	-	K03921	Metabolic pathways;
HORVU.MOREX.r3.2HG0206610.1	7.21059	8.23907	52.6725	40.107	27.0573	7.72483	46.3897	6.00528	2.58623	0.0289483	0.197077	Lectin-domain containing receptor kinase A4.3	324	20	2.80E-72	79.08	-	-	-	-	-	-	-	-	-	-
HORVU.MOREX.r3.6HG0583990.1	0	0	4.78841	17.6471	5.60887	0	11.2177	Inf	Inf	0.0452938	0.254384	hypothetical protein ZWY2020_032988, partial	705	20	3.84E-139	92.27	-	-	-	-	-	-	-	-	-	-
HORVU.MOREX.r3.5HG0534680.1	0	0	5.74609	16.0428	5.44722	0	10.8944	Inf	Inf	0.0462273	0.256784	3-ketoacyl-CoA synthase 6-like	1260	20	0	87.57	3	P:GO:0006633; C:GO:0016021; F:GO:0102756	P:fatty acid biosynthetic process; C:integral component of membrane; F:very-long-chain 3-ketoacyl-CoA synthase activity	EC:2.3; EC:2; EC:2.3.1.199; EC:2.3.1	Acyltransferases; Transferases; Very-long-chain 3-oxoacyl-CoA synthase; Acyltransferases	-	-	-	K15397	Metabolic pathways; Biosynthesis of secondary metabolites; Plant-pathogen interaction;
HORVU.MOREX.r3.3HG0315320.1	0	0	18.1959	20.8556	9.7629	0	19.5258	Inf	Inf	0.00566691	0.0670927	hypothetical protein CFC21_021060	408	20	2.28E-40	78.36	1	C:GO:0016021	C:integral component of membrane	-	-	-	-	-	-	-
HORVU.MOREX.r3.2HG0128550.1	6.00883	4.11953	163.764	248.663	105.639	5.06418	206.213	40.72	5.34767	8.42E-08	8.25E-06	uncharacterized protein LOC109753003	1089	20	0	86.68	-	-	-	-	-	-	-	-	-	-
HORVU.MOREX.r3.4HG0334400.1	0	0	22.9844	49.7327	18.1793	0	36.3585	Inf	Inf	0.000266666	0.00627346	putative F-box protein At3g16210 isoform X1	1371	20	0	78.71	-	-	-	-	-	-	-	-	-	-
HORVU.MOREX.r3.4HG0374900.1	1.80265	0	177.171	272.728	112.925	0.901324	224.949	249.577	7.96334	3.34E-11	2.02E-08	putative LRR receptor-like serine/threonine-protein kinase	1539	20	0	81.35	-	-	-	-	-	-	-	-	-	-
HORVU.MOREX.r3.4HG0384420.1	4.80706	0	106.303	150.802	65.478	2.40353	128.552	53.4849	5.74106	8.77E-07	6.04E-05	predicted protein	762	20	2.40E-173	92.25	1	P:GO:0032196	P:transposition	-	-	-	-	-	-	-
HORVU.MOREX.r3.6HG0618590.1	32.4477	24.7172	102.472	208.556	92.0483	28.5824	155.514	5.4409	2.44385	0.00866959	0.0908963	putative transcription elongation factor SPT5 homolog 1	3087	20	0	94.76	8	F:GO:0003729; F:GO:0003735; C:GO:0005840; P:GO:0006357; P:GO:0006368; P:GO:0006412; C:GO:0032044; P:GO:0032784	F:mRNA binding; F:structural constituent of ribosome; C:ribosome; P:regulation of transcription by RNA polymerase II; P:transcription elongation by RNA polymerase II promoter; P:translation; C:DSIF complex; P:regulation of DNA-templated transcription elongation	-	-	-	-	-	K15172	-
HORVU.MOREX.r3.5HG0531540.1	1.20177	0	12.4499	28.877	10.6322	0.600883	20.6634	34.3885	5.10385	0.0281014	0.194232	ATP-dependent zinc metalloprotease FTSH 5, mitochondrial-like	1707	20	0	88.46	7	F:GO:0004176; F:GO:0004222; F:GO:0005524; P:GO:0006508; C:GO:0009536; C:GO:0016020; F:GO:0016887	F:ATP-dependent peptidase activity; F:metalloendopeptidase activity; F:ATP binding; P:proteolysis; C:plastid; C:membrane; F:ATP hydrolysis activity	EC:3.4.24; EC:3.6.1; EC:3.4; EC:3.6; EC:3; EC:3.6.1.15	Acting on peptide bonds (peptidases); Acting on acid anhydrides; Acting on peptide bonds (peptidases); Acting on acid anhydrides; Hydrolases; Nucleoside-triphosphate phosphatase	-	-	-	K08955	Mitophagy - yeast;
HORVU.MOREX.r3.2HG0111070.1	0	0	16.2806	30.4813	11.6905	0	23.3809	Inf	Inf	0.00302988	0.042814	zinc finger MYM-type protein 1-like	1200	20	0	87.82	1	F:GO:0046983	F:protein dimerization activity	-	-	-	-	-	-	-
HORVU.MOREX.r3.6HG0555560.1	0	4.11953	22.9844	16.0428	10.7867	2.05977	19.5136	9.47368	3.24392	0.0491821	0.265651	ankyrin repeat-containing protein At2g01680-like	870	20	5.95E-178	77.29	1	C:GO:0016021	C:integral component of membrane	-	-	-	-	-	-	-
HORVU.MOREX.r3.1HG0088440.1	0	0	14.3652	25.6685	10.0084	0	20.0168	Inf	Inf	0.00589442	0.0690502	WUSCHEL-related homeobox 12-like	1470	20	0	82.28	5	F:GO:0003677; F:GO:0003700; C:GO:0005634; P:GO:0006355; P:GO:0050793	F:DNA binding; F:DNA-binding transcription factor activity; C:nucleus; P:regulation of DNA-templated transcription; P:regulation of developmental process	-	-	-	-	-	-	-
HORVU.MOREX.r3.1HG0017680.1	1.20177	0	15.3229	24.0642	10.1472	0.600883	19.6935	32.7744	5.0345	0.0294984	0.199194	zinc finger MYM-type protein 1-like	309	20	1.91E-60	91.51	1	F:GO:0046983	F:protein dimerization activity	-	-	-	-	-	-	-
HORVU.MOREX.r3.2HG0177960.1	0	0	20.1113	30.4813	12.6482	0	25.2963	Inf	Inf	0.00192955	0.030388	hypothetical protein ZWY2020_054565	576	20	3.68E-45	88.28	-	-	-	-	-	-	-	-	-	-
HORVU.MOREX.r3.5HG0443490.1	6.00883	1.02988	47.8841	54.5455	27.3671	3.51935	51.2148	14.5523	3.86318	0.00510401	0.0624453	Plant invertase/pectin methylesterase inhibitor superfamily protein	669	20	1.67E-112	82.07	3	F:GO:0030599; P:GO:0043086; F:GO:0046910	F:pectinesterase activity; P:negative regulation of catalytic activity; F:pectinesterase inhibitor activity	EC:3.1; EC:3.1.1.11; EC:3; EC:3.1.1.1	Acting on ester bonds; Pectinesterase; Hydrolases; Carboxylesterase	-	-	-	-	-
HORVU.MOREX.r3.4HG0416340.1	3.6053	2.05977	45.011	38.5027	22.2947	2.83253	41.7569	14.7419	3.88185	0.00681626	0.0765731	LRR receptor-like serine/threonine-protein kinase GSO1	3357	20	0	81.12	1	C:GO:0016021	C:integral component of membrane	-	-	-	-	-	-	-
HORVU.MOREX.r3.6HG0617840.1	3.6053	0	31.6035	52.9412	22.0375	1.80265	42.2724	23.4501	4.55153	0.00498503	0.0613448	phenylalanine--tRNA ligase alpha subunit, cytoplasmic-like	1548	20	0	92.56	5	F:GO:0000049; F:GO:0004826; F:GO:0005524; P:GO:0006432; C:GO:0009328	F:tRNA binding; F:phenylalanine-tRNA ligase activity; F:ATP binding; P:phenylalanyl-tRNA aminoacylation; C:phenylalanine-tRNA ligase complex	EC:6.1.1.20; EC:6.1; EC:6.1.1; EC:6	Phenylalanine--tRNA ligase; Forming carbon-oxygen bonds; Forming carbon-oxygen bonds; Ligases	-	-	-	K01889	Aminoacyl-tRNA biosynthesis;
HORVU.MOREX.r3.7HG0743970.1	0	0	25.8574	60.9626	21.705	0	43.41	Inf	Inf	7.11E-05	0.00219236	BTB/POZ and MATH domain-containing protein 1-like	426	20	1.09E-97	88.54	2	P:GO:0009628; P:GO:0016567	P:response to abiotic stimulus; P:protein ubiquitination	-	-	-	-	-	-	-
HORVU.MOREX.r3.2HG0101670.1	2.40353	2.05977	42.138	16.0428	15.661	2.23165	29.0904	13.0354	3.70436	0.0176787	0.146368	wall-associated receptor kinase 2-like	2271	20	0	91.21	7	F:GO:0004674; F:GO:0005509; F:GO:0005524; P:GO:0006468; P:GO:0007166; C:GO:0016021; F:GO:0030247	F:protein serine/threonine kinase activity; F:calcium ion binding; F:ATP binding; P:protein phosphorylation; P:cell surface receptor signaling pathway; C:integral component of membrane; F:polysaccharide binding	EC:2.7.1; EC:2.7; EC:2	Transferring phosphorus-containing groups; Transferring phosphorus-containing groups; Transferases	-	-	-	-	-
HORVU.MOREX.r3.7HG0735220.1	50.4741	59.7332	272.939	397.861	195.252	55.1037	335.4	6.08671	2.60566	0.0013444	0.0228707	retrotransposon protein, putative, unclassified	2529	20	9.28E-173	62.64	5	F:GO:0003676; F:GO:0003824; F:GO:0003964; P:GO:0006278; F:GO:0008270	F:nucleic acid binding; F:catalytic activity; F:RNA-directed DNA polymerase activity; P:RNA-templated DNA biosynthetic process; F:zinc ion binding	-	-	-	-	-	-	-
HORVU.MOREX.r3.4HG0339090.1	2.40353	2.05977	136.948	218.182	89.8984	2.23165	177.565	79.5668	6.3141	7.52E-09	1.15E-06	transposase family protein	396	20	7.60E-55	84.2	-	-	-	-	-	-	-	-	-	-
HORVU.MOREX.r3.5HG0467140.1	1.80265	0	28.7304	41.7113	18.0611	0.901324	35.2209	39.0768	5.28824	0.00389141	0.0511387	zinc finger protein CONSTANS-LIKE 5-like	510	20	4.86E-77	68.82	2	C:GO:0005634; P:GO:0009909	C:nucleus; P:regulation of flower development	-	-	-	-	-	-	-
HORVU.MOREX.r3.5HG0473970.1	0	0	24.8997	17.6471	10.6367	0	21.2734	Inf	Inf	0.00333441	0.0457066	UDP-glycosyltransferase 90A1-like	1479	20	0	90.25	1	F:GO:0035251	F:UDP-glucosyltransferase activity	EC:2.4; EC:2; EC:2.4.1	Glycosyltransferases; Transferases; Glycosyltransferases	-	-	-	-	-
HORVU.MOREX.r3.3HG0304130.1	0	3.08965	21.069	16.0428	10.0504	1.54483	18.5559	12.0116	3.58636	0.0427184	0.246067	hypothetical protein CFC21_023775	291	2	1.41E-53	88.43	-	-	-	-	-	-	-	-	-	-
HORVU.MOREX.r3.5HG0499880.1	115.369	139.034	24.8997	38.5027	79.4515	127.202	31.7012	0.24922	-2.00451	0.0173451	0.144941	5'-3' exoribonuclease 3-like isoform X2	2472	20	0	86.19	5	F:GO:0003676; F:GO:0004534; C:GO:0005634; P:GO:0006397; P:GO:0090503	F:nucleic acid binding; F:5'-3' exoribonuclease activity; C:nucleus; P:mRNA processing; P:RNA phosphodiester bond hydrolysis, exonucleolytic	EC:3.1; EC:3.1.13; EC:3; EC:3.1.15	Acting on ester bonds; Acting on ester bonds; Hydrolases; Acting on ester bonds	-	-	-	-	-
HORVU.MOREX.r3.7HG0751350.1	1.20177	4.11953	108.218	198.931	78.1175	2.66065	153.574	57.7206	5.85101	4.69E-08	5.23E-06	F-box protein At5g03100-like isoform X1	1488	20	0	63.16	-	-	-	-	-	-	-	-	-	-
HORVU.MOREX.r3.1HG0004270.1	0	0	11.4922	16.0428	6.88374	0	13.7675	Inf	Inf	0.0208115	0.162143	uncharacterized protein LOC123404287	1095	20	0	93.23	-	-	-	-	-	-	-	-	-	-
HORVU.MOREX.r3.1HG0055860.1	2.40353	0	40.2226	57.7541	25.0951	1.20177	48.9883	40.7637	5.34921	0.000750989	0.0144224	uncharacterized protein LOC123411417	1197	20	0	85.76	-	-	-	-	-	-	-	-	-	-
HORVU.MOREX.r3.2HG0215700.1	8.41236	8.23907	54.5878	83.4225	38.6655	8.32571	69.0052	8.2882	3.05106	0.00740568	0.0809215	predicted protein	1377	20	0	87.34	-	-	-	-	-	-	-	-	-	-
HORVU.MOREX.r3.3HG0247690.1	2.40353	0	46.9264	73.7969	30.7817	1.20177	60.3616	50.2275	5.6504	0.000157688	0.0042138	Cytokinin-O-glucosyltransferase 2	1731	20	0	90.82	-	-	-	-	-	-	-	-	-	-
HORVU.MOREX.r3.7HG0748220.1	0	0	12.4499	22.4599	8.72744	0	17.4549	Inf	Inf	0.0101103	0.100955	zinc finger protein 7-like	546	20	1.41E-114	80.38	2	F:GO:0003700; P:GO:0006355	F:DNA-binding transcription factor activity; P:regulation of DNA-templated transcription	-	-	-	-	-	-	-
HORVU.MOREX.r3.7HG0637310.1	0	0	9.57681	14.4385	6.00383	0	12.0077	Inf	Inf	0.0316049	0.207335	hypothetical protein D1007_26172	300	20	6.88E-52	91.21	-	-	-	-	-	-	-	-	-	-
HORVU.MOREX.r3.5HG0531710.1	1.20177	2.05977	12.4499	36.8984	13.1525	1.63077	24.6741	15.1304	3.91938	0.0363612	0.22461	pentatricopeptide repeat-containing protein At5g08510	858	20	1.54E-112	86.24	-	-	-	-	-	-	-	-	-	-
HORVU.MOREX.r3.5HG0425010.1	8093.29	9607.78	1580.17	1270.59	5137.96	8850.54	1425.38	0.16105	-2.63442	0.0224397	0.16984	5-methyltetrahydropteroyltriglutamate--homocysteine methyltransferase 1-like	2298	20	0	98.77	5	F:GO:0003871; F:GO:0008270; P:GO:0009086; C:GO:0009507; P:GO:0032259	F:5-methyltetrahydropteroyltriglutamate-homocysteine S-methyltransferase activity; F:zinc ion binding; P:methionine biosynthetic process; C:chloroplast; P:methylation	EC:2.1; EC:2.1.1.14; EC:2; EC:2.1.1	Transferring one-carbon groups; 5-methyltetrahydropteroyltriglutamate--homocysteine S-methyltransferase; Transferases; Transferring one-carbon groups	-	-	-	K00549	Metabolic pathways; Biosynthesis of secondary metabolites; Biosynthesis of amino acids; Cysteine and methionine metabolism;
HORVU.MOREX.r3.2HG0206010.1	2.40353	0	37.3496	32.0856	17.9597	1.20177	34.7176	28.8888	4.85244	0.00528396	0.0639327	probable pectinesterase/pectinesterase inhibitor 58	3405	20	0	85.3	6	F:GO:0004857; F:GO:0030599; P:GO:0042545; P:GO:0043086; F:GO:0045330; P:GO:0045490	F:enzyme inhibitor activity; F:pectinesterase activity; P:cell wall modification; P:negative regulation of catalytic activity; F:aspartyl esterase activity; P:pectin catabolic process	EC:3.1; EC:3.1.1.11; EC:3; EC:3.1.1.1	Acting on ester bonds; Pectinesterase; Hydrolases; Carboxylesterase	-	-	-	-	-
HORVU.MOREX.r3.4HG0337290.1	0	0	14.3652	14.4385	7.20093	0	14.4019	Inf	Inf	0.016559	0.140945	hypothetical protein ZWY2020_021451, partial	705	20	2.99E-143	95.27	-	-	-	-	-	-	-	-	-	-
HORVU.MOREX.r3.2HG0168760.1	1.20177	4.11953	19.1536	33.6899	14.5412	2.66065	26.4217	9.93056	3.31188	0.0427655	0.2463	ATP-dependent DNA helicase PIF1-like	1374	20	0	89.95	7	P:GO:0000723; F:GO:0003678; F:GO:0005524; P:GO:0006281; P:GO:0006310; F:GO:0016887; P:GO:0032508	P:telomere maintenance; F:DNA helicase activity; F:ATP binding; P:DNA repair; P:DNA recombination; F:ATP hydrolysis activity; P:DNA duplex unwinding	EC:3.6.1; EC:3.6; EC:3; EC:3.6.1.15	Acting on acid anhydrides; Acting on acid anhydrides; Hydrolases; Nucleoside-triphosphate phosphatase	-	-	-	-	-
HORVU.MOREX.r3.3HG0267050.1	89.5315	87.5401	4105.58	6632.09	2728.69	88.5358	5368.84	60.6403	5.9222	5.70E-07	4.17E-05	DDE-type integrase/transposase/recombinase	3984	20	0	78.62	4	F:GO:0003676; F:GO:0008270; P:GO:0015074; F:GO:0016779	F:nucleic acid binding; F:zinc ion binding; P:DNA integration; F:nucleotidyltransferase activity	EC:2.7; EC:2; EC:2.7.7	Transferring phosphorus-containing groups; Transferases; Transferring phosphorus-containing groups	-	-	-	-	-
HORVU.MOREX.r3.7HG0720310.1	1.20177	0	17.2383	14.4385	8.21964	0.600883	15.8384	26.3585	4.7202	0.0485673	0.263773	pentatricopeptide repeat-containing protein At2g22410, mitochondrial-like	1905	20	0	90.14	3	F:GO:0003723; P:GO:0009451; C:GO:0043231	F:RNA binding; P:RNA modification; C:intracellular membrane-bounded organelle	-	-	-	-	-	-	-
HORVU.MOREX.r3.1HG0040000.1	174.857	192.588	35.4342	44.9198	111.95	183.723	40.177	0.218683	-2.19309	0.00684638	0.0766848	3-ketoacyl-CoA thiolase 2, peroxisomal-like	1386	20	0	97.25	4	F:GO:0003988; C:GO:0005777; P:GO:0006635; P:GO:0010124	F:acetyl-CoA C-acyltransferase activity; C:peroxisome; P:fatty acid beta-oxidation; P:phenylacetate catabolic process	EC:2.3; EC:2; EC:2.3.1.16; EC:2.3.1	Acyltransferases; Transferases; Acetyl-CoA C-acyltransferase; Acyltransferases	-	-	-	K07513	Metabolic pathways; Biosynthesis of secondary metabolites; Valine, leucine and isoleucine degradation; PPAR signaling pathway;
HORVU.MOREX.r3.1HG0040000.2	120.177	117.407	20.1113	14.4385	68.0333	118.792	17.2749	0.145422	-2.78168	0.00328424	0.0452216	3-ketoacyl-CoA thiolase 2, peroxisomal-like	1206	20	0	97.29	4	F:GO:0003988; C:GO:0005777; P:GO:0006635; P:GO:0010124	F:acetyl-CoA C-acyltransferase activity; C:peroxisome; P:fatty acid beta-oxidation; P:phenylacetate catabolic process	EC:2.3; EC:2; EC:2.3.1.16; EC:2.3.1	Acyltransferases; Transferases; Acetyl-CoA C-acyltransferase; Acyltransferases	-	-	-	-	-
HORVU.MOREX.r3.5HG0490130.1	0	2.05977	39.2649	72.1926	28.3793	1.02988	55.7288	54.1117	5.75787	8.06E-05	0.0024191	predicted protein	660	20	4.96E-117	82.19	1	P:GO:0032196	P:transposition	-	-	-	-	-	-	-
HORVU.MOREX.r3.4HG0416190.1	1711.91	1938.24	449.153	391.444	1122.69	1825.08	420.298	0.230291	-2.11847	0.0156888	0.136288	coatomer subunit alpha-3-like	3657	20	0	98.96	7	C:GO:0000139; F:GO:0005198; P:GO:0006886; P:GO:0006888; P:GO:0006890; P:GO:0006891; C:GO:0030126	C:Golgi membrane; F:structural molecule activity; P:intracellular protein transport; P:endoplasmic reticulum to Golgi vesicle-mediated transport; P:retrograde vesicle-mediated transport, Golgi to endoplasmic reticulum; P:intra-Golgi vesicle-mediated transport; C:COPI vesicle coat	-	-	-	-	-	-	-
HORVU.MOREX.r3.3HG0326730.1	1.20177	0	15.3229	35.2942	12.9547	0.600883	25.3085	42.1189	5.3964	0.0131672	0.121675	hypothetical protein ZWY2020_026237	486	20	4.47E-106	89.1	-	-	-	-	-	-	-	-	-	-
HORVU.MOREX.r3.7HG0733760.1	1.20177	2.05977	87.149	121.925	53.0839	1.63077	104.537	64.1031	6.00232	7.32E-07	5.15E-05	predicted protein	756	20	1.08E-145	72.62	3	F:GO:0003676; F:GO:0008408; P:GO:0090305	F:nucleic acid binding; F:3'-5' exonuclease activity; P:nucleic acid phosphodiester bond hydrolysis	EC:3.1; EC:3	Acting on ester bonds; Hydrolases	-	-	-	-	-
HORVU.MOREX.r3.4HG0402920.1	0	0	42.138	32.0856	18.5559	0	37.1118	Inf	Inf	0.000138432	0.00379194	probable prolyl 4-hydroxylase 6	921	20	0	90.92	5	F:GO:0004656; F:GO:0005506; C:GO:0005789; P:GO:0019511; F:GO:0031418	F:procollagen-proline 4-dioxygenase activity; F:iron ion binding; C:endoplasmic reticulum membrane; P:peptidyl-proline hydroxylation; F:L-ascorbic acid binding	EC:1.14.11; EC:1; EC:1.14; EC:1.14.11.2	Acting on paired donors, with incorporation or reduction of molecular oxygen. The oxygen incorporated need not be derived from O(2); Oxidoreductases; Acting on paired donors, with incorporation or reduction of molecular oxygen. The oxygen incorporated need not be derived from O(2); Procollagen-proline 4-dioxygenase	-	-	-	K00472	Metabolic pathways; Arginine and proline metabolism;
HORVU.MOREX.r3.1HG0076820.1	1180.73	1624.13	9462.85	4512.84	4195.14	1402.43	6987.84	4.98267	2.31692	0.0190592	0.153723	BAHD acyltransferase DCR-like	1350	20	0	94.93	5	C:GO:0005737; P:GO:0010090; P:GO:0010143; F:GO:0050734; P:GO:0051179	C:cytoplasm; P:trichome morphogenesis; P:cutin biosynthetic process; F:hydroxycinnamoyltransferase activity; P:localization	EC:2.3; EC:2; EC:2.3.1	Acyltransferases; Transferases; Acyltransferases	-	-	-	-	-
HORVU.MOREX.r3.2HG0110400.1	3.00441	0	33.5188	48.1284	21.1629	1.50221	40.8236	27.1758	4.76425	0.00395706	0.0517658	FBD-associated F-box protein At4g13985-like	1107	20	0	81.89	-	-	-	-	-	-	-	-	-	-
HORVU.MOREX.r3.7HG0647690.1	4.80706	8.23907	44.0533	62.5669	29.9166	6.52306	53.3101	8.17256	3.03079	0.0116736	0.111979	zinc finger MYM-type protein 1-like	735	20	3.21E-170	89.1	2	C:GO:0016021; F:GO:0046983	C:integral component of membrane; F:protein dimerization activity	-	-	-	-	-	-	-
HORVU.MOREX.r3.7HG0703840.1	0	0	58.4186	184.492	60.7277	0	121.455	Inf	Inf	1.60E-09	3.22E-07	hypothetical protein ZWY2020_046834	492	20	1.10E-49	67.08	-	-	-	-	-	-	-	-	-	-
HORVU.MOREX.r3.6HG0615500.1	11.4168	14.4184	740.288	1097.33	465.863	12.9176	918.807	71.1285	6.15236	1.17E-10	4.61E-08	glycine-rich protein-like	720	20	9.77E-72	82.46	1	F:GO:0070300	F:phosphatidic acid binding	-	-	-	-	-	-	-
HORVU.MOREX.r3.6HG0543800.1	161.637	160.662	17.2383	12.8342	88.0929	161.15	15.0363	0.0933061	-3.42188	0.000192245	0.00489346	histone H2A.1-like	444	20	6.58E-57	100	4	C:GO:0000786; F:GO:0003677; C:GO:0005634; F:GO:0046982	C:nucleosome; F:DNA binding; C:nucleus; F:protein heterodimerization activity	-	-	-	-	-	K11251	Necroptosis;
HORVU.MOREX.r3.2HG0134490.1	781.748	642.647	101.514	120.321	411.558	712.198	110.918	0.15574	-2.68279	0.00061772	0.0123495	kinesin-like protein KIN-4C isoform X1	3777	20	0	96.17	6	F:GO:0003777; F:GO:0005524; C:GO:0005874; P:GO:0007018; P:GO:0007052; F:GO:0008017	F:microtubule motor activity; F:ATP binding; C:microtubule; P:microtubule-based movement; P:mitotic spindle organization; F:microtubule binding	-	-	-	-	-	-	-
HORVU.MOREX.r3.4HG0341070.1	12.0177	19.5678	158.017	73.7969	65.8499	15.7927	115.907	7.33928	2.87564	0.000838673	0.0156782	dormancy-associated protein 1	354	20	1.86E-58	86.68	-	-	-	-	-	-	-	-	-	-
HORVU.MOREX.r3.5HG0535420.2	71.505	40.1655	1561.98	2026.21	924.963	55.8352	1794.09	32.1319	5.00593	2.67E-07	2.22E-05	muscle M-line assembly protein unc-89-like	1104	20	3.45E-96	83.37	3	C:GO:0005634; P:GO:0006355; F:GO:0046982	C:nucleus; P:regulation of DNA-templated transcription; F:protein heterodimerization activity	-	-	-	-	-	-	-
HORVU.MOREX.r3.5HG0535420.1	70.3033	74.1516	2096.36	2602.14	1210.74	72.2274	2349.25	32.5258	5.02351	3.97E-07	3.03E-05	muscle M-line assembly protein unc-89-like	1266	20	2.31E-93	83.45	3	C:GO:0005634; P:GO:0006355; F:GO:0046982	C:nucleus; P:regulation of DNA-templated transcription; F:protein heterodimerization activity	-	-	-	-	-	-	-
HORVU.MOREX.r3.7HG0644580.1	0	0	14.3652	3.20856	4.39344	0	8.78689	Inf	Inf	0.0482293	0.262596	Ethylene-responsive transcription factor CRF1	405	20	1.59E-57	93.69	-	-	-	-	-	-	-	-	-	-
HORVU.MOREX.r3.4HG0384860.1	0	0	11.4922	16.0428	6.88374	0	13.7675	Inf	Inf	0.0208115	0.162143	ATP-dependent DNA helicase PIF1-like	1068	20	0	92.91	7	P:GO:0000723; F:GO:0003678; F:GO:0005524; P:GO:0006281; P:GO:0006310; F:GO:0016887; P:GO:0032508	P:telomere maintenance; F:DNA helicase activity; F:ATP binding; P:DNA repair; P:DNA recombination; F:ATP hydrolysis activity; P:DNA duplex unwinding	EC:3.6.1; EC:3.6; EC:3; EC:3.6.1.15	Acting on acid anhydrides; Acting on acid anhydrides; Hydrolases; Nucleoside-triphosphate phosphatase	-	-	-	-	-
HORVU.MOREX.r3.2HG0205120.1	0	4.11953	70.8684	52.9412	31.9823	2.05977	61.9048	30.0543	4.9095	7.33E-05	0.00224342	receptor-like protein 13	3183	20	0	79.47	1	C:GO:0016020	C:membrane	-	-	-	-	-	-	-
HORVU.MOREX.r3.2HG0211960.1	0	0	39.2649	32.0856	17.8376	0	35.6753	Inf	Inf	0.000191901	0.004888	WD repeat domain phosphoinositide-interacting protein 3	561	20	2.66E-69	69.05	3	F:GO:0003676; F:GO:0004523; P:GO:0090502	F:nucleic acid binding; F:RNA-DNA hybrid ribonuclease activity; P:RNA phosphodiester bond hydrolysis, endonucleolytic	-	-	-	-	-	-	-
HORVU.MOREX.r3.4HG0341790.1	0.600883	0	9.57681	19.2514	7.35726	0.300441	14.4141	47.9764	5.58425	0.0469778	0.259826	Protein TRANSPARENT TESTA 12	582	20	3.79E-48	75.93	4	F:GO:0003677; F:GO:0003700; C:GO:0005634; P:GO:0006355	F:DNA binding; F:DNA-binding transcription factor activity; C:nucleus; P:regulation of DNA-templated transcription	-	-	-	-	-	-	-
HORVU.MOREX.r3.1HG0005250.1	0	0	8.61913	11.23	4.96227	0	9.92454	Inf	Inf	0.0491191	0.265387	chalcone synthase 2-like	1191	20	0	98.67	-	-	-	-	-	-	-	-	K00660	Metabolic pathways; Biosynthesis of secondary metabolites; Flavonoid biosynthesis; Tropane, piperidine and pyridine alkaloid biosynthesis; Circadian rhythm - plant;
HORVU.MOREX.r3.2HG0117100.1	60.0883	59.7332	1060.15	1273.8	613.443	59.9108	1166.98	19.4786	4.28382	1.35E-06	8.35E-05	predicted protein	1272	20	0	84.62	1	C:GO:0016021	C:integral component of membrane	-	-	-	-	-	-	-
HORVU.MOREX.r3.3HG0236970.1	6.00883	5.14942	60.3339	72.1926	35.9212	5.57912	66.2633	11.877	3.5701	0.00248834	0.036883	pentatricopeptide repeat-containing protein At4g14820-like	1743	20	0	89.6	-	-	-	-	-	-	-	-	-	-
HORVU.MOREX.r3.1HG0058140.1	12.0177	16.4781	98.6412	109.091	59.057	14.2479	103.866	7.28993	2.8659	0.0025664	0.0377421	ethylene-responsive transcription factor ERF039-like	831	20	1.36E-90	82.1	4	F:GO:0003677; F:GO:0003700; C:GO:0005634; P:GO:0006355	F:DNA binding; F:DNA-binding transcription factor activity; C:nucleus; P:regulation of DNA-templated transcription	-	-	-	-	-	-	-
HORVU.MOREX.r3.5HG0473580.1	10.215	0	138.864	131.551	70.1574	5.1075	135.207	26.4723	4.72641	9.40E-06	0.000411324	pathogenesis-related protein 1	495	20	7.64E-95	95.91	3	C:GO:0005615; P:GO:0006952; P:GO:0009607	C:extracellular space; P:defense response; P:response to biotic stimulus	-	-	-	-	-	K13449	MAPK signaling pathway - plant; Plant hormone signal transduction; Plant-pathogen interaction;
HORVU.MOREX.r3.1HG0066370.1	38.4565	54.5838	6.70377	3.20856	25.7382	46.5202	4.95616	0.106538	-3.23056	0.0190425	0.15362	glutathione transferase GST 23-like	831	20	9.52E-158	93.04	3	F:GO:0004364; C:GO:0005737; P:GO:0006749	F:glutathione transferase activity; C:cytoplasm; P:glutathione metabolic process	EC:2.5.1; EC:2.5.1.18; EC:2	Transferring alkyl or aryl groups, other than methyl groups; Glutathione transferase; Transferases	-	-	-	K00799	Metabolic pathways; Metabolism of xenobiotics by cytochrome P450; Drug metabolism - cytochrome P450; Drug metabolism - other enzymes; Chemical carcinogenesis - DNA adducts; Chemical carcinogenesis - receptor activation; Chemical carcinogenesis - reactive oxygen species;
HORVU.MOREX.r3.7HG0683250.1	10.215	5.14942	26.8151	89.8397	33.0048	7.68221	58.3274	7.59252	2.92458	0.0267985	0.189281	ubiquitin carboxyl-terminal hydrolase 2-like	2991	20	0	77.16	4	F:GO:0004843; P:GO:0006511; F:GO:0008270; P:GO:0016579	F:cysteine-type deubiquitinase activity; P:ubiquitin-dependent protein catabolic process; F:zinc ion binding; P:protein deubiquitination	EC:3.4; EC:3; EC:3.4.19.12	Acting on peptide bonds (peptidases); Hydrolases; Ubiquitinyl hydrolase 1	-	-	-	-	-
HORVU.MOREX.r3.7HG0672880.1	2.40353	3.08965	28.7304	83.4225	29.4115	2.74659	56.0765	20.4168	4.35168	0.00152881	0.0252972	hypothetical protein ZWY2020_034458	360	20	2.06E-53	92.69	1	C:GO:0016021	C:integral component of membrane	-	-	-	-	-	-	-
HORVU.MOREX.r3.5HG0438190.1	7.21059	2.05977	115.879	213.369	84.6297	4.63518	164.624	35.5163	5.15041	1.04E-06	6.85E-05	B3 domain-containing protein LOC_Os12g40090-like isoform X1	1167	20	0	84.97	2	F:GO:0003677; C:GO:0005634	F:DNA binding; C:nucleus	-	-	-	-	-	-	-
HORVU.MOREX.r3.2HG0112010.1	10.215	13.3885	91.9374	101.07	54.1526	11.8017	96.5035	8.17705	3.03158	0.00207047	0.0320824	vacuolar-sorting receptor 1-like	2409	20	0	96.3	10	F:GO:0005509; C:GO:0005768; C:GO:0005802; P:GO:0006511; P:GO:0006623; P:GO:0006896; C:GO:0016021; P:GO:0016567; C:GO:0017119; F:GO:0061630	F:calcium ion binding; C:endosome; C:trans-Golgi network; P:ubiquitin-dependent protein catabolic process; P:protein targeting to vacuole; P:Golgi to vacuole transport; C:integral component of membrane; P:protein ubiquitination; C:Golgi transport complex; F:ubiquitin protein ligase activity	EC:2	Transferases	-	-	-	-	-
HORVU.MOREX.r3.3HG0238300.1	0	0	10.5345	30.4813	10.254	0	20.5079	Inf	Inf	0.00615159	0.0711307	hypothetical protein ZWY2020_004145	690	20	8.28E-142	96.41	-	-	-	-	-	-	-	-	-	-
HORVU.MOREX.r3.3HG0289380.1	63.6935	66.9424	11.4922	1.60428	35.9331	65.318	6.54823	0.100252	-3.3183	0.00777278	0.0840038	protein E6-like	750	20	1.12E-125	69.18	-	-	-	-	-	-	-	-	-	-
HORVU.MOREX.r3.6HG0573610.1	0	0	7.66145	12.8342	5.12392	0	10.2478	Inf	Inf	0.0481216	0.26223	zinc finger CCCH domain-containing protein 14-like	1029	20	0	73.73	-	-	-	-	-	-	-	-	-	-
HORVU.MOREX.r3.2HG0189990.1	1.20177	0	35.4342	88.2354	31.2178	0.600883	61.8348	102.907	6.68519	4.06E-05	0.00137416	hypothetical protein D1007_45529	2067	20	0	78.05	-	-	-	-	-	-	-	-	-	-
HORVU.MOREX.r3.7HG0714300.1	0	0	8.61913	12.8342	5.36334	0	10.7267	Inf	Inf	0.042105	0.243846	hypothetical protein CFC21_021060	408	20	4.86E-46	77.77	1	C:GO:0016021	C:integral component of membrane	-	-	-	-	-	-	-
HORVU.MOREX.r3.4HG0351060.1	0	0	15.3229	12.8342	7.03928	0	14.0786	Inf	Inf	0.016987	0.142967	hypothetical protein ZWY2020_004145	690	20	7.59E-141	96.41	-	-	-	-	-	-	-	-	-	-
HORVU.MOREX.r3.7HG0749670.1	349.714	384.147	69.9107	33.6899	209.365	366.93	51.8003	0.141172	-2.82447	0.000736489	0.0142607	ervatamin-B-like	1170	20	0	91.45	4	F:GO:0004197; C:GO:0005615; C:GO:0005764; P:GO:0051603	F:cysteine-type endopeptidase activity; C:extracellular space; C:lysosome; P:proteolysis involved in protein catabolic process	EC:3.4.22; EC:3.4; EC:3	Acting on peptide bonds (peptidases); Acting on peptide bonds (peptidases); Hydrolases	-	-	-	-	-
HORVU.MOREX.r3.5HG0498350.1	0	0	20.1113	22.4599	10.6428	0	21.2856	Inf	Inf	0.00387193	0.0509718	hypothetical protein ZWY2020_023714	414	20	9.28E-84	77.44	3	F:GO:0003676; F:GO:0004523; P:GO:0090502	F:nucleic acid binding; F:RNA-DNA hybrid ribonuclease activity; P:RNA phosphodiester bond hydrolysis, endonucleolytic	EC:3.1.30; EC:3.1; EC:3; EC:3.1.26; EC:3.1.26.4	Acting on ester bonds; Acting on ester bonds; Hydrolases; Acting on ester bonds; Ribonuclease H	-	-	-	-	-
HORVU.MOREX.r3.6HG0578520.1	0	0	13.4075	22.4599	8.96686	0	17.9337	Inf	Inf	0.00894512	0.0926724	23.6 kDa heat shock protein, mitochondrial	477	20	2.19E-55	88.39	1	P:GO:0009408	P:response to heat	-	-	-	-	-	K13993	-
HORVU.MOREX.r3.1HG0066750.1	12.6185	20.5977	72.7838	62.5669	42.1417	16.6081	67.6753	4.07484	2.02674	0.0368542	0.226003	retrotransposon protein	765	20	5.02E-96	73.57	2	F:GO:0003676; F:GO:0008270	F:nucleic acid binding; F:zinc ion binding	-	-	-	-	-	-	-
HORVU.MOREX.r3.1HG0072630.1	0	0	10.5345	12.8342	5.84218	0	11.6844	Inf	Inf	0.0323601	0.210091	uncharacterized protein LOC123078228 isoform X1	330	20	3.61E-28	68.92	4	F:GO:0004518; P:GO:0006281; P:GO:0090305; F:GO:0140097	F:nuclease activity; P:DNA repair; P:nucleic acid phosphodiester bond hydrolysis; F:catalytic activity, acting on DNA	EC:3.1; EC:3	Acting on ester bonds; Hydrolases	-	-	-	-	-
HORVU.MOREX.r3.3HG0326810.1	0	0	5.74609	16.0428	5.44722	0	10.8944	Inf	Inf	0.0462273	0.256784	predicted protein	564	20	5.70E-136	83.94	2	P:GO:0017148; F:GO:0030598	P:negative regulation of translation; F:rRNA N-glycosylase activity	EC:3.2; EC:3.2.2.22; EC:3; EC:3.2.2	Glycosylases; rRNA N-glycosylase; Hydrolases; Glycosylases	-	-	-	-	-
HORVU.MOREX.r3.6HG0589460.1	0	0	19.1536	12.8342	7.99697	0	15.9939	Inf	Inf	0.0104289	0.102973	serine/threonine-protein phosphatase 7 long form homolog	438	20	1.34E-52	65.64	2	P:GO:0010073; P:GO:0048507	P:meristem maintenance; P:meristem development	-	-	-	-	-	-	-
HORVU.MOREX.r3.1HG0066060.1	0	0	6.70377	17.6471	6.08771	0	12.1754	Inf	Inf	0.034469	0.217565	hypothetical protein ZWY2020_032988, partial	774	20	6.89E-158	96.47	-	-	-	-	-	-	-	-	-	-
HORVU.MOREX.r3.6HG0578820.1	0	0	7.66145	24.0642	7.93141	0	15.8628	Inf	Inf	0.016236	0.139085	zingiberene synthase-like	1509	20	0	90.06	3	F:GO:0000287; F:GO:0010333; P:GO:0016102	F:magnesium ion binding; F:terpene synthase activity; P:diterpenoid biosynthetic process	EC:4.2; EC:4; EC:4.2.3	Carbon-oxygen lyases; Lyases; Carbon-oxygen lyases	-	-	-	-	-
HORVU.MOREX.r3.7HG0648070.1	0	0	87.149	176.471	65.9049	0	131.81	Inf	Inf	3.55E-10	1.06E-07	F-box protein At5g07610-like	1320	20	0	69.41	1	C:GO:0016021	C:integral component of membrane	-	-	-	-	-	-	-
HORVU.MOREX.r3.3HG0310170.1	0	0	12.4499	33.6899	11.5349	0	23.0699	Inf	Inf	0.00363148	0.0486248	protein FAR1-RELATED SEQUENCE 5-like	690	20	2.20E-146	91.42	4	C:GO:0005634; P:GO:0006355; F:GO:0008270; F:GO:0046872	C:nucleus; P:regulation of DNA-templated transcription; F:zinc ion binding; F:metal ion binding	-	-	-	-	-	-	-
HORVU.MOREX.r3.4HG0356730.1	3.6053	6.1793	54.5878	68.984	33.3391	4.8923	61.7859	12.6292	3.65869	0.00207267	0.0320901	calcium-dependent protein kinase 25-like	1602	20	0	94.78	10	F:GO:0004683; F:GO:0005509; F:GO:0005516; F:GO:0005524; C:GO:0005634; C:GO:0005737; F:GO:0009931; P:GO:0018105; P:GO:0035556; P:GO:0046777	F:calmodulin-dependent protein kinase activity; F:calcium ion binding; F:calmodulin binding; F:ATP binding; C:nucleus; C:cytoplasm; F:calcium-dependent protein serine/threonine kinase activity; P:peptidyl-serine phosphorylation; P:intracellular signal transduction; P:protein autophosphorylation	EC:2.7.1; EC:2.7; EC:2; EC:2.7.11.17	Transferring phosphorus-containing groups; Transferring phosphorus-containing groups; Transferases; Calcium/calmodulin-dependent protein kinase	-	-	-	K13412	Plant-pathogen interaction;
HORVU.MOREX.r3.3HG0254000.1	0	0	24.8997	11.23	9.03242	0	18.0648	Inf	Inf	0.00593935	0.0694682	hypothetical protein ZWY2020_004145	705	20	6.17E-147	90.93	-	-	-	-	-	-	-	-	-	-
HORVU.MOREX.r3.5HG0483950.1	0.600883	0	44.0533	72.1926	29.2117	0.300441	58.123	193.459	7.59588	1.90E-05	0.000734314	hypothetical protein ZWY2020_045646	591	20	1.34E-94	96.66	-	-	-	-	-	-	-	-	-	-
HORVU.MOREX.r3.3HG0312670.1	0	0	9.57681	16.0428	6.4049	0	12.8098	Inf	Inf	0.0270218	0.189845	protein MAIN-LIKE 2-like	696	20	5.52E-169	97.35	1	P:GO:0010073	P:meristem maintenance	-	-	-	-	-	-	-
HORVU.MOREX.r3.5HG0508700.2	16.8247	12.3586	74.6991	77.0054	45.222	14.5917	75.8523	5.19833	2.37805	0.0222431	0.168744	transcription factor PHYTOCHROME INTERACTING FACTOR-LIKE 13-like	1467	20	0	80.14	2	C:GO:0005634; F:GO:0046983	C:nucleus; F:protein dimerization activity	-	-	-	-	-	K16189	Plant hormone signal transduction;
HORVU.MOREX.r3.5HG0508700.3	17.4256	12.3586	89.0644	68.984	46.9581	14.8921	79.0242	5.30645	2.40775	0.0163526	0.139727	transcription factor PHYTOCHROME INTERACTING FACTOR-LIKE 13-like	1467	20	0	80.14	2	C:GO:0005634; F:GO:0046983	C:nucleus; F:protein dimerization activity	-	-	-	-	-	K16189	Plant hormone signal transduction;
HORVU.MOREX.r3.7HG0699080.1	16.8247	22.6574	2484.23	3896.8	1605.13	19.7411	3190.51	161.618	7.33644	1.92E-10	6.66E-08	DDE-type integrase/transposase/recombinase	393	20	5.24E-88	90.41	2	F:GO:0003676; P:GO:0015074	F:nucleic acid binding; P:DNA integration	-	-	-	-	-	-	-
HORVU.MOREX.r3.2HG0106120.1	0	0	7.66145	12.8342	5.12392	0	10.2478	Inf	Inf	0.0481216	0.26223	probable cystathionine gamma-synthase 2	1383	20	0	95.07	4	F:GO:0003962; P:GO:0009086; P:GO:0019346; F:GO:0030170	F:cystathionine gamma-synthase activity; P:methionine biosynthetic process; P:transsulfuration; F:pyridoxal phosphate binding	EC:2.5.1; EC:2.5.1.48; EC:2	Transferring alkyl or aryl groups, other than methyl groups; Cystathionine gamma-synthase; Transferases	-	-	-	K01739	Metabolic pathways; Biosynthesis of secondary metabolites; Biosynthesis of amino acids; Sulfur metabolism; Cysteine and methionine metabolism;
HORVU.MOREX.r3.7HG0749510.1	0	2.05977	15.3229	24.0642	10.3617	1.02988	19.6935	19.1221	4.25717	0.0288678	0.196847	NAC domain-containing protein 40-like	1296	20	0	66.88	3	F:GO:0003677; C:GO:0005634; P:GO:0006355	F:DNA binding; C:nucleus; P:regulation of DNA-templated transcription	-	-	-	-	-	-	-
HORVU.MOREX.r3.6HG0546210.1	0	2.05977	52.6725	44.9198	24.913	1.02988	48.7962	47.3803	5.56621	0.000151569	0.00408811	UPF0481 protein At3g47200-like	918	20	1.57E-137	59.29	2	C:GO:0016020; C:GO:0016021	C:membrane; C:integral component of membrane	-	-	-	-	-	-	-
HORVU.MOREX.r3.7HG0712730.1	0	0	13.4075	9.62568	5.7583	0	11.5166	Inf	Inf	0.0297945	0.20015	putative F-box protein At4g22660	954	20	0	60.9	3	F:GO:0003723; F:GO:0003743; P:GO:0006413	F:RNA binding; F:translation initiation factor activity; P:translational initiation	-	-	-	-	-	-	-
HORVU.MOREX.r3.1HG0067160.1	188.076	177.14	22.0267	38.5027	106.436	182.608	30.2647	0.165736	-2.59304	0.00137277	0.0232166	Bowman-Birk type proteinase inhibitor B5-like	273	20	5.17E-48	96.16	3	F:GO:0004867; C:GO:0005576; P:GO:0010951	F:serine-type endopeptidase inhibitor activity; C:extracellular region; P:negative regulation of endopeptidase activity	-	-	-	-	-	-	-
HORVU.MOREX.r3.2HG0110910.1	0	0	21.069	3.20856	6.06939	0	12.1388	Inf	Inf	0.0199205	0.15771	F-box/FBD/LRR-repeat protein	1605	20	0	58.93	-	-	-	-	-	-	-	-	-	-
HORVU.MOREX.r3.1HG0072100.1	10.8159	14.4184	0	0	6.30856	12.6171	0	0	#NAME?	0.0453414	0.254423	2-oxoglutarate-dependent dioxygenase DAO-like	897	20	0	94.75	5	P:GO:0009852; P:GO:0010252; F:GO:0046872; F:GO:0050302; F:GO:0051213	P:auxin catabolic process; P:auxin homeostasis; F:metal ion binding; F:indole-3-acetaldehyde oxidase activity; F:dioxygenase activity	EC:1.2; EC:1; EC:1.2.3.9; EC:1.2.3.7; EC:1.2.3; EC:1.2.3.1	Acting on the aldehyde or oxo group of donors; Oxidoreductases; Aryl-aldehyde oxidase; Indole-3-acetaldehyde oxidase; Acting on the aldehyde or oxo group of donors; Aldehyde oxidase	-	-	-	K23947	Tryptophan metabolism;
HORVU.MOREX.r3.4HG0409080.1	0	0	24.8997	44.9198	17.4549	0	34.9098	Inf	Inf	0.000325486	0.00737055	Alternative oxidase 1a, mitochondrial	1491	20	0	97.49	-	-	-	-	-	-	-	-	-	-
HORVU.MOREX.r3.1HG0047090.1	2.40353	0	73.7415	94.6525	42.6994	1.20177	84.197	70.0611	6.13054	6.84E-06	0.000316524	hypothetical protein D1007_35200	795	20	7.24E-140	74.58	-	-	-	-	-	-	-	-	-	-
HORVU.MOREX.r3.6HG0614350.1	89.5315	111.227	19.1536	4.81284	56.1813	100.379	11.9832	0.119379	-3.06638	0.00399114	0.0520655	PLAT domain-containing protein 3-like	567	20	5.88E-112	93.32	-	-	-	-	-	-	-	-	-	-
HORVU.MOREX.r3.1HG0038720.1	3.6053	0	28.7304	59.3583	22.9235	1.80265	44.0444	24.4332	4.61077	0.00433088	0.0554013	AT hook-containing MAR binding 1-like protein	612	20	1.04E-114	75.12	-	-	-	-	-	-	-	-	-	-
HORVU.MOREX.r3.7HG0637160.1	18.6274	15.4483	56.5032	93.0482	45.9068	17.0378	74.7757	4.38881	2.13383	0.0476689	0.261542	retrotransposon protein, putative, unclassified	585	20	5.95E-90	60.35	-	-	-	-	-	-	-	-	-	-
HORVU.MOREX.r3.2HG0114250.1	80.5183	92.6895	365.834	608.022	286.766	86.6039	486.928	5.62247	2.49121	0.00230731	0.0348184	nucleolar protein 58	459	20	1.47E-63	95.87	-	-	-	-	-	-	-	-	-	-
HORVU.MOREX.r3.5HG0488260.1	0	0	15.3229	6.41712	5.435	0	10.87	Inf	Inf	0.0311915	0.205634	Amidase 1	615	20	5.90E-136	95.04	-	-	-	-	-	-	-	-	-	-
HORVU.MOREX.r3.7HG0726110.1	0	0	4.78841	22.4599	6.81208	0	13.6242	Inf	Inf	0.0280349	0.19395	hypothetical protein D1007_45031	555	20	1.98E-121	88.67	-	-	-	-	-	-	-	-	-	-
HORVU.MOREX.r3.7HG0749010.1	0	0	14.3652	27.2728	10.4095	0	20.819	Inf	Inf	0.00509182	0.0623727	ATP-dependent DNA helicase PIF1-like	1623	20	0	88.07	7	P:GO:0000723; F:GO:0003678; F:GO:0005524; P:GO:0006281; P:GO:0006310; F:GO:0016887; P:GO:0032508	P:telomere maintenance; F:DNA helicase activity; F:ATP binding; P:DNA repair; P:DNA recombination; F:ATP hydrolysis activity; P:DNA duplex unwinding	EC:3.6.1; EC:3.6; EC:3; EC:3.6.1.15	Acting on acid anhydrides; Acting on acid anhydrides; Hydrolases; Nucleoside-triphosphate phosphatase	-	-	-	-	-
HORVU.MOREX.r3.1HG0075150.1	40.2591	67.9723	469.264	702.674	320.042	54.1157	585.969	10.8281	3.43671	2.80E-05	0.00100847	U-box domain-containing protein 29-like	1362	20	0	95.13	2	P:GO:0016567; F:GO:0061630	P:protein ubiquitination; F:ubiquitin protein ligase activity	EC:2	Transferases	-	-	-	-	-
HORVU.MOREX.r3.7HG0751700.1	1.20177	2.05977	21.069	32.0856	14.104	1.63077	26.5773	16.2974	4.02657	0.0223277	0.169215	zinc finger protein ZAT9-like	561	20	4.72E-88	83.21	-	-	-	-	-	-	-	-	-	-
HORVU.MOREX.r3.1HG0034760.1	0	0	9.57681	22.4599	8.00918	0	16.0184	Inf	Inf	0.0146554	0.130172	putative transposase	639	20	1.92E-139	81.81	1	F:GO:0003676	F:nucleic acid binding	-	-	-	-	-	-	-
HORVU.MOREX.r3.5HG0440560.1	90.1324	63.8528	257.616	425.134	209.184	76.9926	341.375	4.43387	2.14857	0.0111636	0.10836	formin-like protein 12 isoform X8	5460	20	0	94.05	-	-	-	-	-	-	-	-	-	-
HORVU.MOREX.r3.5HG0493420.1	0	0	18.1959	48.1284	16.5811	0	33.1622	Inf	Inf	0.000536341	0.0110224	predicted protein	651	20	1.26E-141	72.49	3	F:GO:0003676; F:GO:0008408; P:GO:0090305	F:nucleic acid binding; F:3'-5' exonuclease activity; P:nucleic acid phosphodiester bond hydrolysis	EC:3.1; EC:3	Acting on ester bonds; Hydrolases	-	-	-	-	-
HORVU.MOREX.r3.1HG0015180.1	2.40353	0	22.9844	80.214	26.4005	1.20177	51.5992	42.9362	5.42412	0.000832408	0.015603	unnamed protein product	1920	20	0	77.45	2	P:GO:0006508; F:GO:0008234	P:proteolysis; F:cysteine-type peptidase activity	EC:3.4; EC:3	Acting on peptide bonds (peptidases); Hydrolases	-	-	-	-	-
HORVU.MOREX.r3.4HG0362760.1	49.2724	64.8827	3601.84	5757.76	2368.44	57.0775	4679.8	81.9902	6.35738	5.77E-08	6.14E-06	predicted protein	825	20	5.89E-160	83.5	1	P:GO:0032196	P:transposition	-	-	-	-	-	-	-
HORVU.MOREX.r3.2HG0103040.1	0	0	21.069	3.20856	6.06939	0	12.1388	Inf	Inf	0.0199205	0.15771	Serine/threonine-protein kinase SMG1	219	20	1.67E-41	77.74	2	C:GO:0005634; P:GO:0006810	C:nucleus; P:transport	-	-	-	-	-	-	-
HORVU.MOREX.r3.7HG0704430.1	4.80706	6.1793	45.9687	123.53	45.1211	5.49318	84.7491	15.4281	3.94748	0.000630241	0.012573	protein ALP1-like	738	20	1.59E-165	73.57	-	-	-	-	-	-	-	-	-	-
HORVU.MOREX.r3.3HG0219950.1	49.2724	40.1655	251.87	312.835	163.536	44.7189	282.352	6.31394	2.65854	0.00133872	0.0227946	hypothetical protein ZWY2020_031249	306	6	2.44E-20	73.15	-	-	-	-	-	-	-	-	-	-
HORVU.MOREX.r3.6HG0601740.1	0	0	10.5345	12.8342	5.84218	0	11.6844	Inf	Inf	0.0323601	0.210091	uncharacterized protein LOC123404792	444	11	7.14E-72	84.43	1	C:GO:0016021	C:integral component of membrane	-	-	-	-	-	-	-
HORVU.MOREX.r3.3HG0284000.1	0	0	14.3652	3.20856	4.39344	0	8.78689	Inf	Inf	0.0482293	0.262596	acyl transferase 5-like	1275	20	0	89.59	1	F:GO:0016747	F:acyltransferase activity, transferring groups other than amino-acyl groups	EC:2.3; EC:2; EC:2.3.1	Acyltransferases; Transferases; Acyltransferases	-	-	-	-	-
HORVU.MOREX.r3.2HG0105110.1	0	0	7.66145	17.6471	6.32713	0	12.6543	Inf	Inf	0.0301232	0.201313	hypothetical protein ZWY2020_005429	1113	20	0	78.48	2	F:GO:0003677; C:GO:0005634	F:DNA binding; C:nucleus	-	-	-	-	-	-	-
HORVU.MOREX.r3.3HG0317270.1	70.9041	60.7631	360.088	635.295	281.763	65.8336	497.691	7.55984	2.91835	0.000544304	0.0111611	retrotransposon protein, putative, unclassified	1122	20	0	81.73	3	C:GO:0000145; P:GO:0006887; C:GO:0016021	C:exocyst; P:exocytosis; C:integral component of membrane	-	-	-	-	-	-	-
HORVU.MOREX.r3.4HG0403090.1	1.20177	2.05977	33.5188	32.0856	17.2165	1.63077	32.8022	20.1146	4.33017	0.00730571	0.0803651	putative calcium-binding protein CML16	708	20	2.10E-144	94.77	-	-	-	-	-	-	-	-	-	-
HORVU.MOREX.r3.3HG0324990.1	9.61412	5.14942	251.87	385.027	162.915	7.38177	318.449	43.1399	5.43095	1.30E-08	1.80E-06	hypothetical protein D1007_12015	1248	20	0	86.86	-	-	-	-	-	-	-	-	-	-
HORVU.MOREX.r3.2HG0168830.1	4.80706	7.20919	63.207	77.0054	38.0572	6.00812	70.1062	11.6686	3.54456	0.00173541	0.0280845	pentatricopeptide repeat-containing protein At4g02750-like	1854	20	0	91.75	-	-	-	-	-	-	-	-	-	-
HORVU.MOREX.r3.6HG0549360.1	48.0706	22.6574	133.118	198.931	100.694	35.364	166.024	4.69472	2.23104	0.0150342	0.132657	zinc finger MYM-type protein 1-like	360	20	9.56E-64	89.49	-	-	-	-	-	-	-	-	-	-
HORVU.MOREX.r3.2HG0099970.1	319.069	327.503	27.7728	33.6899	177.009	323.286	30.7313	0.0950593	-3.39503	3.60E-05	0.00124561	chalcone synthase 2-like	1188	20	0	99.78	4	P:GO:0009813; F:GO:0016210; P:GO:0030639; F:GO:0102128	P:flavonoid biosynthetic process; F:naringenin-chalcone synthase activity; P:polyketide biosynthetic process; F:chalcone synthase activity	EC:2.3.1.74; EC:2.3; EC:2; EC:2.3.1	Chalcone synthase; Acyltransferases; Transferases; Acyltransferases	-	-	-	K00660	Metabolic pathways; Biosynthesis of secondary metabolites; Flavonoid biosynthesis; Tropane, piperidine and pyridine alkaloid biosynthesis; Circadian rhythm - plant;
HORVU.MOREX.r3.6HG0577120.1	7.21059	11.3287	64.1646	113.904	49.152	9.26965	89.0343	9.60492	3.26377	0.00192825	0.0303802	ABC transporter G family member 39	4347	20	0	98.69	5	F:GO:0005524; C:GO:0005886; C:GO:0016021; P:GO:0055085; F:GO:0140359	F:ATP binding; C:plasma membrane; C:integral component of membrane; P:transmembrane transport; F:ABC-type transporter activity	EC:7	n/a	-	-	-	K08711	ABC transporters;
HORVU.MOREX.r3.3HG0226110.1	20.43	24.7172	516.19	705.883	316.805	22.5736	611.037	27.0686	4.75855	6.21E-08	6.53E-06	16.9 kDa class I heat shock protein 1-like	456	20	1.10E-79	99.37	7	P:GO:0006457; P:GO:0009408; P:GO:0009651; P:GO:0042542; F:GO:0043621; F:GO:0051082; P:GO:0051259	P:protein folding; P:response to heat; P:response to salt stress; P:response to hydrogen peroxide; F:protein self-association; F:unfolded protein binding; P:protein complex oligomerization	-	-	-	-	-	K13993	-
HORVU.MOREX.r3.1HG0060760.1	13.8203	10.2988	129.287	190.909	86.0788	12.0596	160.098	13.2756	3.73071	8.38E-05	0.00250168	NBS-LRR disease resistance protein	942	20	7.88E-142	74.32	6	F:GO:0004252; P:GO:0006508; C:GO:0016021; F:GO:0016760; P:GO:0030244; P:GO:0071669	F:serine-type endopeptidase activity; P:proteolysis; C:integral component of membrane; F:cellulose synthase (UDP-forming) activity; P:cellulose biosynthetic process; P:plant-type cell wall organization or biogenesis	EC:3.4.21; EC:2.4.1.12; EC:3.4; EC:2.4; EC:2; EC:3; EC:2.4.1	Acting on peptide bonds (peptidases); Cellulose synthase (UDP-forming); Acting on peptide bonds (peptidases); Glycosyltransferases; Transferases; Hydrolases; Glycosyltransferases	-	-	-	-	-
HORVU.MOREX.r3.4HG0349300.1	18.0265	36.0459	140.779	179.679	93.6327	27.0362	160.229	5.92647	2.56717	0.00213819	0.0328697	putative auxin transporter-like protein 4	1653	20	0	92.09	3	C:GO:0005886; P:GO:0006865; C:GO:0016021	C:plasma membrane; P:amino acid transport; C:integral component of membrane	-	-	-	-	-	K13946	Plant hormone signal transduction;
[truncated: 4,998 more rows]

## Sheet: RC_RI Upregulated genes
Genes	RC.1	RC.2	RI.1	RI.2	normalised_count	normalised_count_RC	normalised_count_RI	foldChange	log2FoldChange	pval	padj	Description	Length	#Hits	e-Value	sim mean	#GO	GO IDs	GO Names	Enzyme Codes	Enzyme Names	InterPro IDs	InterPro GO IDs	InterPro GO Names	Cross-reference (KO)	KEGG-pathways
[truncated: 5,567 more rows]

[truncated: 7 more sheets: RC_RI Downregulated genes, SC_SI DEGs with annotation, SC_SI Upregulated genes, SC_SI Downregulated genes, Commonly expressed genes, Exclusively Resistant, Exclusively Susceptible]
