# Supplementary material for: Transcriptome analysis of Bipolaris sorokiniana - Hordeum vulgare provides insights into mechanisms of host-pathogen interaction
Source: Front Microbiol. 2024 Mar 20;15:1360571. doi: 10.3389/fmicb.2024.1360571 (PMC10993733; doi:10.3389/fmicb.2024.1360571)
Supplement: Supplementary file 2 [file Table_2.XLSX]

## Sheet: RC_RI CC
GO_Category in Resistant genotype	NumberofGenes	NumberofGenes%	GOID	GO-Term
Cellular Component	1314	20.9	GO:0044464	cell part
Cellular Component	1125	17.9	GO:0005622	intracellular
Cellular Component	1122	17.9	GO:0044424	intracellular part
Cellular Component	1048	16.7	GO:0044425	membrane part
Cellular Component	1019	16.2	GO:0031224	intrinsic to membrane
Cellular Component	966	15.4	GO:0043229	intracellular organelle
Cellular Component	914	14.5	GO:0043227	membrane-bounded organelle
Cellular Component	315	5	GO:0044422	organelle part
Cellular Component	315	5	GO:0044446	intracellular organelle part
Cellular Component	234	3.7	GO:0071944	cell periphery
Cellular Component	209	3.3	GO:0005886	plasma membrane
Cellular Component	194	3.1	GO:0043228	non-membrane-bounded organelle
Cellular Component	172	2.7	GO:0043234	protein complex
Cellular Component	99	1.6	GO:0032993	protein-DNA complex
Cellular Component	92	1.5	GO:0031090	organelle membrane
Cellular Component	71	1.1	GO:0012505	endomembrane system
Cellular Component	42	0.7	GO:0044459	plasma membrane part
Cellular Component	41	0.7	GO:0043233	organelle lumen
Cellular Component	36	0.6	GO:0048046	apoplast
Cellular Component	30	0.5	GO:0030529	ribonucleoprotein complex
Cellular Component	29	0.5	GO:0031975	envelope
Cellular Component	25	0.4	GO:0031982	vesicle
Cellular Component	23	0.4	GO:0005615	extracellular space
Cellular Component	23	0.4	GO:0005789	endoplasmic reticulum membrane
Cellular Component	23	0.4	GO:0042175	nuclear outer membrane-endoplasmic reticulum membrane network
Cellular Component	23	0.4	GO:0044421	extracellular region part
Cellular Component	22	0.4	GO:0012506	vesicle membrane
Cellular Component	18	0.3	GO:0030117	membrane coat
Cellular Component	18	0.3	GO:0048475	coated membrane
Cellular Component	12	0.2	GO:0030312	external encapsulating structure
Cellular Component	9	0.1	GO:0034357	photosynthetic membrane
Cellular Component	6	0.1	GO:0019867	outer membrane
Cellular Component	6	0.1	GO:0031201	SNARE complex
Cellular Component	6	0.1	GO:0046930	pore complex
Cellular Component	5	0.1	GO:0005905	coated pit
Cellular Component	4	0.1	GO:0005911	cell-cell junction
Cellular Component	4	0.1	GO:0009506	plasmodesma
Cellular Component	3	0	GO:0034098	Cdc48p-Npl4p-Ufd1p AAA ATPase complex
Cellular Component	3	0	GO:0044455	mitochondrial membrane part
Cellular Component	2	0	GO:0016469	proton-transporting two-sector ATPase complex
Cellular Component	2	0	GO:0071439	clathrin complex
Cellular Component	2	0	GO:0072546	ER membrane protein complex
Cellular Component	1	0	GO:0000313	organellar ribosome
Cellular Component	1	0	GO:0000814	ESCRT II complex
Cellular Component	1	0	GO:0008287	protein serine/threonine phosphatase complex
Cellular Component	1	0	GO:0019898	extrinsic to membrane
Cellular Component	1	0	GO:0030119	AP-type membrane coat adaptor complex
Cellular Component	1	0	GO:0030897	HOPS complex
Cellular Component	1	0	GO:0031970	organelle envelope lumen
Cellular Component	1	0	GO:0033177	proton-transporting two-sector ATPase complex, proton-transporting domain
Cellular Component	1	0	GO:0033178	proton-transporting two-sector ATPase complex, catalytic domain
Cellular Component	1	0	GO:0042765	GPI-anchor transamidase complex
Cellular Component	1	0	GO:0042995	cell projection

## Sheet: RC_RI BP
GO_Category in Resistant genotype	NumberofGenes	NumberofGenes%	GOID	GO-Term
Biological Process	1445	23	GO:0071704	organic substance metabolic process
Biological Process	1393	22.2	GO:0044238	primary metabolic process
Biological Process	1344	21.4	GO:0044237	cellular metabolic process
Biological Process	983	15.6	GO:0044763	single-organism cellular process
Biological Process	662	10.5	GO:0006807	nitrogen compound metabolic process
Biological Process	489	7.8	GO:0050789	regulation of biological process
Biological Process	344	5.5	GO:0009058	biosynthetic process
Biological Process	328	5.2	GO:0006950	response to stress
Biological Process	279	4.4	GO:0051234	establishment of localization
Biological Process	272	4.3	GO:0006810	transport
Biological Process	266	4.2	GO:0044710	single-organism metabolic process
Biological Process	248	3.9	GO:0016043	cellular component organization
Biological Process	243	3.9	GO:0051716	cellular response to stimulus
Biological Process	242	3.9	GO:0044765	single-organism transport
Biological Process	163	2.6	GO:0009056	catabolic process
Biological Process	162	2.6	GO:0044707	single-multicellular organism process
Biological Process	159	2.5	GO:0042221	response to chemical stimulus
Biological Process	119	1.9	GO:0007275	multicellular organismal development
Biological Process	118	1.9	GO:0044700	single organism signaling
Biological Process	106	1.7	GO:0044085	cellular component biogenesis
Biological Process	95	1.5	GO:0048856	anatomical structure development
Biological Process	84	1.3	GO:0065008	regulation of biological quality
Biological Process	84	1.3	GO:0033036	macromolecule localization
Biological Process	81	1.3	GO:0009628	response to abiotic stimulus
Biological Process	75	1.2	GO:0071554	cell wall organization or biogenesis
Biological Process	73	1.2	GO:0051641	cellular localization
Biological Process	68	1.1	GO:0022414	reproductive process
Biological Process	64	1	GO:0051649	establishment of localization in cell
Biological Process	60	1	GO:0032259	methylation
Biological Process	59	0.9	GO:0009719	response to endogenous stimulus
Biological Process	57	0.9	GO:0045184	establishment of protein localization
Biological Process	51	0.8	GO:0048610	cellular process involved in reproduction
Biological Process	50	0.8	GO:0065009	regulation of molecular function
Biological Process	50	0.8	GO:0009791	post-embryonic development
Biological Process	46	0.7	GO:0010073	meristem maintenance
Biological Process	44	0.7	GO:0009607	response to biotic stimulus
Biological Process	41	0.7	GO:0044706	multi-multicellular organism process
Biological Process	41	0.7	GO:0044703	multi-organism reproductive process
Biological Process	33	0.5	GO:0051707	response to other organism
Biological Process	32	0.5	GO:0044767	single-organism developmental process
Biological Process	29	0.5	GO:0003006	developmental process involved in reproduction
Biological Process	28	0.4	GO:0048869	cellular developmental process
Biological Process	15	0.2	GO:0009605	response to external stimulus
Biological Process	13	0.2	GO:0019953	sexual reproduction
Biological Process	13	0.2	GO:0009653	anatomical structure morphogenesis
Biological Process	8	0.1	GO:0044702	single organism reproductive process
Biological Process	8	0.1	GO:0006955	immune response
Biological Process	7	0.1	GO:0042445	hormone metabolic process
Biological Process	7	0.1	GO:0048646	anatomical structure formation involved in morphogenesis
Biological Process	6	0.1	GO:0048609	multicellular organismal reproductive process
Biological Process	6	0.1	GO:0051656	establishment of organelle localization
Biological Process	6	0.1	GO:0032504	multicellular organism reproduction
Biological Process	4	0.1	GO:0035821	modification of morphology or physiology of other organism
Biological Process	4	0.1	GO:0016049	cell growth
Biological Process	4	0.1	GO:0007389	pattern specification process
Biological Process	3	0	GO:0016265	death
Biological Process	3	0	GO:0051236	establishment of RNA localization
Biological Process	3	0	GO:0031640	killing of cells of other organism
Biological Process	3	0	GO:0019827	stem cell maintenance
Biological Process	3	0	GO:0051235	maintenance of location
Biological Process	3	0	GO:0048589	developmental growth
Biological Process	2	0	GO:0051606	detection of stimulus
Biological Process	2	0	GO:0002252	immune effector process
Biological Process	2	0	GO:0055046	microgametogenesis
Biological Process	2	0	GO:0015976	carbon utilization
Biological Process	1	0	GO:0044419	interspecies interaction between organisms
Biological Process	1	0	GO:0042330	taxis
Biological Process	1	0	GO:0009561	megagametogenesis

## Sheet: RC_RI MF
GO_Category in Resistant genotype	NumberofGenes	NumberofGenes%	GOID	GO-Term
Molecular Function	1458	23.2	GO:0097159	organic cyclic compound binding
Molecular Function	1458	23.2	GO:1901363	heterocyclic compound binding
Molecular Function	1104	17.6	GO:0043167	ion binding
Molecular Function	675	10.7	GO:0016740	transferase activity
Molecular Function	670	10.7	GO:0016787	hydrolase activity
Molecular Function	622	9.9	GO:0036094	small molecule binding
Molecular Function	397	6.3	GO:0005515	protein binding
Molecular Function	185	2.9	GO:0016491	oxidoreductase activity
Molecular Function	167	2.7	GO:0022857	transmembrane transporter activity
Molecular Function	152	2.4	GO:0003700	sequence-specific DNA binding transcription factor activity
Molecular Function	119	1.9	GO:0022892	substrate-specific transporter activity
Molecular Function	68	1.1	GO:0048037	cofactor binding
Molecular Function	62	1	GO:0030246	carbohydrate binding
Molecular Function	56	0.9	GO:0016829	lyase activity
Molecular Function	41	0.7	GO:0004871	signal transducer activity
Molecular Function	35	0.6	GO:0016874	ligase activity
Molecular Function	34	0.5	GO:0004601	peroxidase activity
Molecular Function	33	0.5	GO:0004857	enzyme inhibitor activity
Molecular Function	33	0.5	GO:0038023	signaling receptor activity
Molecular Function	32	0.5	GO:0008289	lipid binding
Molecular Function	23	0.4	GO:0001871	pattern binding
Molecular Function	19	0.3	GO:0016853	isomerase activity
Molecular Function	14	0.2	GO:0061134	peptidase regulator activity
Molecular Function	13	0.2	GO:1901476	carbohydrate transporter activity
Molecular Function	11	0.2	GO:0019207	kinase regulator activity
Molecular Function	11	0.2	GO:0033218	amide binding
Molecular Function	11	0.2	GO:0005200	structural constituent of cytoskeleton
Molecular Function	10	0.2	GO:0051540	metal cluster binding
Molecular Function	10	0.2	GO:1901681	sulfur compound binding
Molecular Function	8	0.1	GO:0003682	chromatin binding
Molecular Function	8	0.1	GO:0000989	transcription factor binding transcription factor activity
Molecular Function	7	0.1	GO:0042910	xenobiotic transporter activity
Molecular Function	7	0.1	GO:0003735	structural constituent of ribosome
Molecular Function	7	0.1	GO:0008047	enzyme activator activity
Molecular Function	7	0.1	GO:1901505	carbohydrate derivative transporter activity
Molecular Function	5	0.1	GO:0019208	phosphatase regulator activity
Molecular Function	4	0.1	GO:0042562	hormone binding
Molecular Function	4	0.1	GO:0060589	nucleoside-triphosphatase regulator activity
Molecular Function	2	0	GO:0019825	oxygen binding
Molecular Function	2	0	GO:0032451	demethylase activity
Molecular Function	2	0	GO:0043021	ribonucleoprotein complex binding
Molecular Function	1	0	GO:0009975	cyclase activity
Molecular Function	1	0	GO:0072328	alkene binding
Molecular Function	1	0	GO:0030337	DNA polymerase processivity factor activity
Molecular Function	1	0	GO:0097367	carbohydrate derivative binding
Molecular Function	1	0	GO:0060090	binding\, bridging

## Sheet: SC_SI CC
GO_Category in Susceptible genotype	NumberofGenes	NumberofGenes%	GOID	GO-Term
Cellular Component	392	33.9	GO:0044464	cell part
Cellular Component	338	29.2	GO:0005622	intracellular
Cellular Component	337	29.1	GO:0044424	intracellular part
Cellular Component	270	23.3	GO:0043229	intracellular organelle
Cellular Component	263	22.7	GO:0043227	membrane-bounded organelle
Cellular Component	247	21.3	GO:0044425	membrane part
Cellular Component	239	20.6	GO:0031224	intrinsic to membrane
Cellular Component	93	8	GO:0044422	organelle part
Cellular Component	93	8	GO:0044446	intracellular organelle part
Cellular Component	73	6.3	GO:0071944	cell periphery
Cellular Component	66	5.7	GO:0005886	plasma membrane
Cellular Component	35	3	GO:0031090	organelle membrane
Cellular Component	31	2.7	GO:0043234	protein complex
Cellular Component	28	2.4	GO:0043228	non-membrane-bounded organelle
Cellular Component	21	1.8	GO:0012505	endomembrane system
Cellular Component	19	1.6	GO:0034357	photosynthetic membrane
Cellular Component	17	1.5	GO:0043233	organelle lumen
Cellular Component	14	1.2	GO:0044459	plasma membrane part
Cellular Component	13	1.1	GO:0005615	extracellular space
Cellular Component	13	1.1	GO:0044421	extracellular region part
Cellular Component	12	1	GO:0032993	protein-DNA complex
Cellular Component	11	0.9	GO:0005789	endoplasmic reticulum membrane
Cellular Component	11	0.9	GO:0042175	nuclear outer membrane-endoplasmic reticulum membrane network
Cellular Component	10	0.9	GO:0031975	envelope
Cellular Component	10	0.9	GO:0048046	apoplast
Cellular Component	6	0.5	GO:0031982	vesicle
Cellular Component	5	0.4	GO:0030312	external encapsulating structure
Cellular Component	4	0.3	GO:0005911	cell-cell junction
Cellular Component	4	0.3	GO:0009506	plasmodesma
Cellular Component	4	0.3	GO:0030529	ribonucleoprotein complex
Cellular Component	2	0.2	GO:0016469	proton-transporting two-sector ATPase complex
Cellular Component	2	0.2	GO:0030117	membrane coat
Cellular Component	2	0.2	GO:0044455	mitochondrial membrane part
Cellular Component	2	0.2	GO:0048475	coated membrane
Cellular Component	2	0.2	GO:0070469	respiratory chain
Cellular Component	2	0.2	GO:0072546	ER membrane protein complex
Cellular Component	1	0.1	GO:0000815	ESCRT III complex
Cellular Component	1	0.1	GO:0005787	signal peptidase complex
Cellular Component	1	0.1	GO:0005905	coated pit
Cellular Component	1	0.1	GO:0012506	vesicle membrane
Cellular Component	1	0.1	GO:0019898	extrinsic to membrane
Cellular Component	1	0.1	GO:0030119	AP-type membrane coat adaptor complex
Cellular Component	1	0.1	GO:0030964	NADH dehydrogenase complex
Cellular Component	1	0.1	GO:0031970	organelle envelope lumen
Cellular Component	1	0.1	GO:0033177	proton-transporting two-sector ATPase complex, proton-transporting domain
Cellular Component	1	0.1	GO:0042646	plastid nucleoid
Cellular Component	1	0.1	GO:0044613	nuclear pore central transport channel
Cellular Component	1	0.1	GO:0045277	respiratory chain complex IV
Cellular Component	1	0.1	GO:0046930	pore complex

## Sheet: SC_SI BP
GO_Category in Susceptible genotype	NumberofGenes	NumberofGenes%	GOID	GO-Term
Biological Process	326	28.2	GO:0071704	organic substance metabolic process
Biological Process	316	27.3	GO:0044237	cellular metabolic process
Biological Process	299	25.8	GO:0044238	primary metabolic process
Biological Process	165	14.2	GO:0044763	single-organism cellular process
Biological Process	141	12.2	GO:0050789	regulation of biological process
Biological Process	118	10.2	GO:0044710	single-organism metabolic process
Biological Process	114	9.8	GO:0006950	response to stress
Biological Process	102	8.8	GO:0006807	nitrogen compound metabolic process
Biological Process	95	8.2	GO:0009058	biosynthetic process
Biological Process	77	6.6	GO:0051234	establishment of localization
Biological Process	75	6.5	GO:0006810	transport
Biological Process	68	5.9	GO:0044765	single-organism transport
Biological Process	66	5.7	GO:0051716	cellular response to stimulus
Biological Process	66	5.7	GO:0009056	catabolic process
Biological Process	63	5.4	GO:0042221	response to chemical stimulus
Biological Process	53	4.6	GO:0016043	cellular component organization
Biological Process	41	3.5	GO:0009628	response to abiotic stimulus
Biological Process	30	2.6	GO:0044707	single-multicellular organism process
Biological Process	27	2.3	GO:0044085	cellular component biogenesis
Biological Process	26	2.2	GO:0007275	multicellular organismal development
Biological Process	25	2.2	GO:0044700	single organism signaling
Biological Process	24	2.1	GO:0033036	macromolecule localization
Biological Process	24	2.1	GO:0048856	anatomical structure development
Biological Process	23	2	GO:0065008	regulation of biological quality
Biological Process	21	1.8	GO:0044767	single-organism developmental process
Biological Process	20	1.7	GO:0009719	response to endogenous stimulus
Biological Process	20	1.7	GO:0051641	cellular localization
Biological Process	19	1.6	GO:0009607	response to biotic stimulus
Biological Process	19	1.6	GO:0071554	cell wall organization or biogenesis
Biological Process	18	1.6	GO:0065009	regulation of molecular function
Biological Process	17	1.5	GO:0032259	methylation
Biological Process	16	1.4	GO:0051649	establishment of localization in cell
Biological Process	14	1.2	GO:0022414	reproductive process
Biological Process	14	1.2	GO:0051707	response to other organism
Biological Process	14	1.2	GO:0045184	establishment of protein localization
Biological Process	13	1.1	GO:0009791	post-embryonic development
Biological Process	10	0.9	GO:0003006	developmental process involved in reproduction
Biological Process	9	0.8	GO:0009605	response to external stimulus
Biological Process	8	0.7	GO:0009653	anatomical structure morphogenesis
Biological Process	6	0.5	GO:0048610	cellular process involved in reproduction
Biological Process	5	0.4	GO:0035821	modification of morphology or physiology of other organism
Biological Process	4	0.3	GO:0048869	cellular developmental process
Biological Process	4	0.3	GO:0007389	pattern specification process
Biological Process	4	0.3	GO:0044706	multi-multicellular organism process
Biological Process	4	0.3	GO:0048646	anatomical structure formation involved in morphogenesis
Biological Process	4	0.3	GO:0044703	multi-organism reproductive process
Biological Process	3	0.3	GO:0042445	hormone metabolic process
Biological Process	3	0.3	GO:0006955	immune response
Biological Process	2	0.2	GO:0044702	single organism reproductive process
Biological Process	2	0.2	GO:0051235	maintenance of location
Biological Process	2	0.2	GO:0019953	sexual reproduction
Biological Process	2	0.2	GO:0051656	establishment of organelle localization
Biological Process	1	0.1	GO:0016265	death
Biological Process	1	0.1	GO:0010073	meristem maintenance
Biological Process	1	0.1	GO:0031640	killing of cells of other organism
Biological Process	1	0.1	GO:0016049	cell growth
Biological Process	1	0.1	GO:0032504	multicellular organism reproduction
Biological Process	1	0.1	GO:0042330	taxis
Biological Process	1	0.1	GO:0048589	developmental growth
Biological Process	1	0.1	GO:0048609	multicellular organismal reproductive process

## Sheet: SC_SI MF
GO_Category in Susceptible genotype	NumberofGenes	NumberofGenes%	GOID	GO-Term
Molecular Function	280	24.2	GO:0097159	organic cyclic compound binding
Molecular Function	280	24.2	GO:1901363	heterocyclic compound binding
Molecular Function	272	23.5	GO:0043167	ion binding
Molecular Function	166	14.3	GO:0016740	transferase activity
Molecular Function	139	12	GO:0036094	small molecule binding
Molecular Function	137	11.8	GO:0016787	hydrolase activity
Molecular Function	77	6.6	GO:0016491	oxidoreductase activity
Molecular Function	69	6	GO:0005515	protein binding
Molecular Function	57	4.9	GO:0003700	sequence-specific DNA binding transcription factor activity
Molecular Function	40	3.5	GO:0022857	transmembrane transporter activity
Molecular Function	38	3.3	GO:0048037	cofactor binding
Molecular Function	26	2.2	GO:0022892	substrate-specific transporter activity
Molecular Function	21	1.8	GO:0030246	carbohydrate binding
Molecular Function	20	1.7	GO:0016829	lyase activity
Molecular Function	17	1.5	GO:0004601	peroxidase activity
Molecular Function	15	1.3	GO:0008289	lipid binding
Molecular Function	14	1.2	GO:0004857	enzyme inhibitor activity
Molecular Function	12	1	GO:0016874	ligase activity
Molecular Function	12	1	GO:0051540	metal cluster binding
Molecular Function	11	0.9	GO:0061134	peptidase regulator activity
Molecular Function	11	0.9	GO:0004871	signal transducer activity
Molecular Function	10	0.9	GO:0038023	signaling receptor activity
Molecular Function	10	0.9	GO:0016853	isomerase activity
Molecular Function	5	0.4	GO:0001871	pattern binding
Molecular Function	5	0.4	GO:1901681	sulfur compound binding
Molecular Function	4	0.3	GO:0042910	xenobiotic transporter activity
Molecular Function	3	0.3	GO:1901476	carbohydrate transporter activity
Molecular Function	2	0.2	GO:0060589	nucleoside-triphosphatase regulator activity
Molecular Function	2	0.2	GO:0019207	kinase regulator activity
Molecular Function	2	0.2	GO:0000989	transcription factor binding transcription factor activity
Molecular Function	2	0.2	GO:0008047	enzyme activator activity
Molecular Function	1	0.1	GO:0003682	chromatin binding
Molecular Function	1	0.1	GO:0003735	structural constituent of ribosome
Molecular Function	1	0.1	GO:0051184	cofactor transporter activity
Molecular Function	1	0.1	GO:0032542	sulfiredoxin activity
Molecular Function	1	0.1	GO:0017056	structural constituent of nuclear pore
Molecular Function	1	0.1	GO:0033218	amide binding
Molecular Function	1	0.1	GO:0060090	binding\, bridging
Molecular Function	1	0.1	GO:0000990	core RNA polymerase binding transcription factor activity
Molecular Function	1	0.1	GO:0004133	glycogen debranching enzyme activity

## Sheet: KEGG Resistant
KEGG PATHWAY RESISTANT	NUMBER OF GENES
Metabolic pathways	304
Biosynthesis of secondary metabolites;	210
Plant-pathogen interaction;	46
Plant hormone signal transduction;	41
Phenylpropanoid biosynthesis;	40
Biosynthesis of cofactors;	35
Microbial metabolism in diverse environments;	29
Necroptosis;	27
Amino sugar and nucleotide sugar metabolism;	27
Biosynthesis of amino acids;	27
MAPK signaling pathway - plant;	24
Starch and sucrose metabolism;	24
Chemical carcinogenesis - reactive oxygen species;	22
Endocytosis;	20
Biosynthesis of nucleotide sugars;	20
Pentose and glucuronate interconversions;	20
ABC transporters	19
Ascorbate and aldarate metabolism;	19
Drug metabolism - cytochrome P450;	18
Cysteine and methionine metabolism;	17
Drug metabolism - other enzymes	17
Cell cycle	16
Glycolysis_Gluconeogenesis;	16
Ubiquitin mediated proteolysis;	16
Chemical carcinogenesis - receptor activation;	16
Salmonella infection;	15
Biosynthesis of various plant secondary metabolites;	15
Metabolism of xenobiotics by cytochrome P450;	15
Cellular senescence	14
Pathogenic Escherichia coli infection	14
Cell cycle - yeast;	14
DNA replication;	14
Flavonoid biosynthesis;	14
Pentose and glucuronate interconversions;	14
Chemical carcinogenesis - DNA adducts	14
Cyanoamino acid metabolism;	13
Carbon metabolism	13
Nitrogen metabolism;	12
Meiosis - yeast;	11
Glycerophospholipid metabolism;	11
Oxidative phosphorylation;	11
Spliceosome;	11
Antigen processing and presentation;	10
Calcium signaling pathway;	10
Glucagon signaling pathway;	10
Oxytocin signaling pathway;	10
Glucagon signaling pathway;	10
Quorum sensing;	10
Glycerolipid metabolism;	10
Axon regeneration;	9
Cutin, suberine and wax biosynthesis;	9
cGMP-PKG signaling pathway;	9
Lysosome;	9
p53 signaling pathway;	8
beta-Alanine metabolism;	8
O-Antigen nucleotide sugar biosynthesis;	8
Tropane, piperidine and pyridine alkaloid biosynthesis;	8
AMPK signaling pathway	7
Terpenoid backbone biosynthesis;	7
Pyruvate metabolism	7
Diterpenoid biosynthesis;	6
Choline metabolism in cancer;	6
Circadian rhythm - plant;	6
Arginine and proline metabolism;	6
Valine, leucine and isoleucine degradation;	6
Galactose metabolism;	6
Adipocytokine signaling pathway	6
Nucleotide metabolism	6
RNA degradation	6
Autophagy - yeast;	5
Stilbenoid, diarylheptanoid and gingerol biosynthesis;	5
Zeatin biosynthesis;	5
Homologous recombination;	5
FoxO signaling pathway;	5
Biotin metabolism;	5
2-Oxocarboxylic acid metabolism;	5
Alanine, aspartate and glutamate metabolism;	5
Glycine, serine and threonine metabolism;	5
Phenylalanine, tyrosine and tryptophan biosynthesis;	5
Ubiquinone and other terpenoid-quinone biosynthesis;	5
Carotenoid biosynthesis;	5
Tyrosine metabolism;	5
Phenylalanine metabolism;	5
Glycine, serine and threonine metabolism;	5
Citrate cycle (TCA cycle);	5
Carbon fixation pathways in prokaryotes	5
Pentose phosphate pathway	5
Pyrimidine metabolism	5
Two-component system	5
mRNA surveillance pathway	5
Ribosome biogenesis in eukaryotes	5
Apoptosis;	4
Basal transcription factors;	4
Axon guidance;	4
Nucleotide excision repair;	4
Mismatch repair;	4
Ras signaling pathway;	4
Pantothenate and CoA biosynthesis;	4
Sulfur metabolism;	4
Isoquinoline alkaloid biosynthesis;	4
Degradation of aromatic compounds;	4
cAMP signaling pathway	4
Carbon fixation in photosynthetic organisms;	4
PPAR signaling pathway	4
Mitophagy - yeast	4
Aminoacyl-tRNA biosynthesis;	3
Sesquiterpenoid and triterpenoid biosynthesis;	3
Rap1 signaling pathway;	3
Fructose and mannose metabolism;	3
Lysine degradation;	3
Caprolactam degradation	3
Chloroalkane and chloroalkene degradation	3
Purine metabolism	3
Proteasome	3
Protein export	3
Protein digestion and absorption	2
Base excision repair;	2
Betalain biosynthesis;	2
Adrenergic signaling in cardiomyocytes;	2
Neurotrophin signaling pathway;	2
Phototransduction;	2
Arginine biosynthesis;	2
Phenazine biosynthesis;	2
Biofilm formation - Pseudomonas aeruginosa;	2
Prodigiosin biosynthesis;	2
Cholesterol metabolism	2
Insect hormone biosynthesis	2
Carbohydrate digestion and absorption	2
MAPK signaling pathway - yeast;	2
Yersinia infection	2
Bacterial secretion system	2
Retrograde endocannabinoid signaling	2
Base excision repair;	1
Autophagy - yeast;	1
Valine, leucine and isoleucine biosynthesis;	1
Glucosinolate biosynthesis;	1
Flavone and flavonol biosynthesis;	1
One carbon pool by folate	1
Biosynthesis of ansamycins	1
Streptomycin biosynthesis	1
Neomycin, kanamycin and gentamicin biosynthesis	1
Biofilm formation - Escherichia coli	1
Indole alkaloid biosynthesis	1
Flavone and flavonol biosynthesis	1
Nucleocytoplasmic transport	1

## Sheet: KEGG Susceptible
KEGG Pathways in Susceptible	No of genes
Metabolic pathways	135
Biosynthesis of secondary metabolites	101
Microbial metabolism in diverse environments	27
Phenylpropanoid biosynthesis	18
Biosynthesis of amino acids	18
Biosynthesis of cofactors	13
Plant-pathogen interaction	15
MAPK signaling pathway - plant	11
Starch and sucrose metabolism	11
Plant hormone signal transduction	10
Cysteine and methionine metabolism	10
Flavonoid biosynthesis	10
Carbon metabolism	10
Glycolysis_Gluconeogenesis	9
Oxidative phosphorylation	9
Amino sugar and nucleotide sugar metabolism	8
Tryptophan metabolism	8
ABC transporters;	7
Antigen processing and presentation	7
Necroptosis	7
Lysosome	7
Ascorbate and aldarate metabolism	7
Biosynthesis of nucleotide sugars	7
Phenylalanine metabolism	7
Tropane, piperidine and pyridine alkaloid biosynthesis	7
Chemical carcinogenesis - reactive oxygen species	7
Ubiquitin mediated proteolysis	7
Endocytosis	6
Alanine, aspartate and glutamate metabolism	6
Ubiquinone and other terpenoid-quinone biosynthesis	6
Fructose and mannose metabolism	6
Tyrosine metabolism	6
Isoquinoline alkaloid biosynthesis	6
Galactose metabolism	6
Glycine, serine and threonine metabolism	6
RNA degradation	6
Drug metabolism - cytochrome P450	6
Drug metabolism - other enzymes	6
Chemical carcinogenesis - receptor activation	6
mRNA surveillance pathway	6
Cyanoamino acid metabolism	5
Biosynthesis of various plant secondary metabolites	5
Lysine biosynthesis	5
beta-Alanine metabolism	5
Metabolism of xenobiotics by cytochrome P450	5
Chemical carcinogenesis - DNA adducts	5
Nitrogen metabolism	5
Betalain biosynthesis	4
Salmonella infection	4
Pentose and glucuronate interconversions	4
2-Oxocarboxylic acid metabolism	4
Arginine and proline metabolism	4
Phenylalanine, tyrosine and tryptophan biosynthesis	4
Circadian rhythm - plant	4
Pyruvate metabolism	4
Carbon fixation in photosynthetic organisms	4
Glucagon signaling pathway;	4
p53 signaling pathway	4
AMPK signaling pathway	3
Stilbenoid, diarylheptanoid and gingerol biosynthesis	3
Cellular senescence	3
Pathogenic Escherichia coli infection	3
Glycerophospholipid metabolism	3
O-Antigen nucleotide sugar biosynthesis	3
Arginine biosynthesis	3
Valine, leucine and isoleucine degradation	3
Pantothenate and CoA biosynthesis	3
Quorum sensing	3
cAMP signaling pathway	3
Monobactam biosynthesis	3
Lysine degradation	3
Pentose phosphate pathway	3
Indole alkaloid biosynthesis	3
Axon regeneration	3
Photosynthesis	3
Base excision repair	2
Apoptosis	2
Zeatin biosynthesis	2
Carbohydrate digestion and absorption	2
DNA replication	2
Phenazine biosynthesis	2
Biofilm formation - Pseudomonas aeruginosa	2
Carotenoid biosynthesis	2
Glycerolipid metabolism	2
Insect hormone biosynthesis	2
Chloroalkane and chloroalkene degradation	2
Sulfur metabolism	2
Streptomycin biosynthesis	2
Nucleotide metabolism	2
Purine metabolism	2
Pyrimidine metabolism	2
Biofilm formation - Escherichia coli	2
Two-component system	2
Retrograde endocannabinoid signaling	2
cGMP-PKG signaling pathway	2
Meiosis - yeast	2
Oxytocin signaling pathway	2
Adrenergic signaling in cardiomyocytes	2
Cell cycle	2
Cell cycle - yeast	2
Adipocytokine signaling pathway	1
Basal transcription factors	1
Non-homologous end-joining	1
Terpenoid backbone biosynthesis	1
Cutin, suberine and wax biosynthesis	1
Nucleotide excision repair	1
Mismatch repair	1
Homologous recombination	1
Valine, leucine and isoleucine biosynthesis	1
Glucosinolate biosynthesis	1
Novobiocin biosynthesis	1
Flavone and flavonol biosynthesis	1
Ras signaling pathway	1
Choline metabolism in cancer	1
D-Amino acid metabolism	1
Biofilm formation - Vibrio cholerae	1
Neomycin, kanamycin and gentamicin biosynthesis	1
Citrate cycle (TCA cycle)	1
Lipopolysaccharide biosynthesis	1
Aminobenzoate degradation	1
Styrene degradation	1
Carbon fixation pathways in prokaryotes	1
Neurotrophin signaling pathway	1
Protein export	1
Ribosome biogenesis in eukaryotes	1
Sesquiterpenoid and triterpenoid biosynthesis	1
Toll and Imd signaling pathway	1
