# Supplementary material for: Transcriptome analysis of Bipolaris sorokiniana - Hordeum vulgare provides insights into mechanisms of host-pathogen interaction
Source: Front Microbiol. 2024 Mar 20;15:1360571. doi: 10.3389/fmicb.2024.1360571 (PMC10993733; doi:10.3389/fmicb.2024.1360571)
Supplement: Supplementary file 3 [file Table_3.XLSX]

## Sheet: BS_RI DEGs with annotation
genes	BS.1	BS.2	RI.1	RI.2	normalised_count	normalised_count_BS	normalised_count_RI	foldChange	log2FoldChange	pval	padj	Description	Length	#Hits	e-Value	sim mean	#GO	GO IDs	GO Names	Enzyme Codes	Enzyme Names	InterPro IDs	InterPro GO IDs	InterPro GO Names	Cross-reference (KO)	KEGG-pathways
EMD69150	115.246	149.396	0	0	66.1605	132.321	0	0	#NAME?	0.0284492	1	NAD(P)-binding protein	771	20	2.27054E-174	95.69	4	F:GO:0016491; F:GO:0016740; P:GO:0036211; F:GO:0140096	F:oxidoreductase activity; F:transferase activity; P:protein modification process; F:catalytic activity, acting on a protein	EC:2.7.1; EC:1; EC:2.7; EC:2	Transferring phosphorus-containing groups; Oxidoreductases; Transferring phosphorus-containing groups; Transferases	-	-	-	-	-
EMD69701	394.957	388.476	16.6368	0	200.018	391.717	8.31838	0.0212357	-5.55737	0.0276414	1	glycoside hydrolase family 16 protein	1365	20	0	91.46	2	P:GO:0005975; F:GO:0016787	P:carbohydrate metabolic process; F:hydrolase activity	EC:3.2; EC:3; EC:3.2.1	Glycosylases; Hydrolases; Glycosylases	-	-	-	-	-
EMD68979	234.021	230.8	0	0	116.205	232.411	0	0	#NAME?	0.0112174	1	uncharacterized protein COCSADRAFT_176835	519	20	5.0066E-106	74.89	-	-	-	-	-	-	-	-	-	-
EMD69143	654.703	669.891	16.6368	0	335.308	662.297	8.31838	0.0125599	-6.31503	0.0158431	1	uncharacterized protein COCSADRAFT_31904	465	20	4.48046E-67	82.07	-	-	-	-	-	-	-	-	-	-
EMD70145	134.841	113.242	0	0	62.0208	124.042	0	0	#NAME?	0.0317837	1	TRP-domain-containing protein	2178	20	0	95.81	1	F:GO:0016874	F:ligase activity	EC:6	Ligases	-	-	-	-	-
EMD69144	162.236	179.952	0	0	85.5469	171.094	0	0	#NAME?	0.0183959	1	uncharacterized protein COCSADRAFT_186131	381	20	2.87811E-87	72.34	2	C:GO:0016020; C:GO:0016021	C:membrane; C:integral component of membrane	-	-	-	-	-	-	-
EMD69199	101.038	103.213	0	0	51.0626	102.125	0	0	#NAME?	0.0443961	1	Calcipressin-domain-containing protein	783	20	1.77922E-165	96.72	1	P:GO:0023052	P:signaling	-	-	-	-	-	-	-
EMD70004	193.903	188.815	0	10.4216	98.285	191.359	5.21082	0.0272306	-5.19863	0.0413715	1	carbohydrate-binding module family 43 protein	1674	20	0	89.25	3	C:GO:0005886; F:GO:0016740; P:GO:0071554	C:plasma membrane; F:transferase activity; P:cell wall organization or biogenesis	EC:2	Transferases	-	-	-	-	-
EMD69284	296.241	298.559	0	0	148.7	297.4	0	0	#NAME?	0.00778877	1	FAS1 domain-containing protein	1356	20	0	87.53	-	-	-	-	-	-	-	-	-	-
EMD70119	316.022	358.387	16.6368	0	172.761	337.204	8.31838	0.0246687	-5.34118	0.0335794	1	von Willebrand domain containing protein	2712	20	0	86.18	1	C:GO:0005635	C:nuclear envelope	-	-	-	-	-	-	-
EMD69264	263.831	309.171	0	0	143.251	286.501	0	0	#NAME?	0.00821191	1	NAC-domain-containing protein	690	20	1.58348E-128	81.5	1	C:GO:0005634	C:nucleus	-	-	-	-	-	-	-
EMD68918	2642.96	2696.12	33.2735	0	1343.09	2669.54	16.6368	0.00623207	-7.32607	0.0129116	1	pyruvate decarboxylase	1722	20	0	97.21	1	F:GO:0016829	F:lyase activity	EC:4.1.1; EC:4.1.1.1; EC:4.1; EC:4	Carbon-carbon lyases; Pyruvate decarboxylase; Carbon-carbon lyases; Lyases	-	-	-	K01568	Metabolic pathways; Biosynthesis of secondary metabolites; Glycolysis_Gluconeogenesis;
EMD68321	560.258	632.454	16.6368	20.8433	307.548	596.356	18.74	0.0314242	-4.99198	0.0373081	1	tyrosinase family protein	861	20	0	80.89	1	F:GO:0016491	F:oxidoreductase activity	EC:1	Oxidoreductases	-	-	-	K00505	Metabolic pathways; Biosynthesis of secondary metabolites; Tyrosine metabolism; Isoquinoline alkaloid biosynthesis; Betalain biosynthesis;
EMD68142	112.553	113.592	0	0	56.5363	113.073	0	0	#NAME?	0.0372731	1	CTP-transf-1 domain containing protein	1431	20	0	93.39	2	F:GO:0016740; F:GO:0016874	F:transferase activity; F:ligase activity	EC:2.7.1; EC:2.7; EC:2; EC:2.7.7; EC:6; EC:2.7.1.107	Transferring phosphorus-containing groups; Transferring phosphorus-containing groups; Transferases; Transferring phosphorus-containing groups; Ligases; Diacylglycerol kinase (ATP)	-	-	-	K16368	Metabolic pathways; Biosynthesis of secondary metabolites; Glycerophospholipid metabolism;
EMD68022	199.661	244.561	0	0	111.056	222.111	0	0	#NAME?	0.0120402	1	tata-box-binding protein	750	20	0	98.36	9	F:GO:0003677; C:GO:0005654; C:GO:0005730; P:GO:0006355; F:GO:0016740; P:GO:0036211; P:GO:0065003; F:GO:0140096; F:GO:0140223	F:DNA binding; C:nucleoplasm; C:nucleolus; P:regulation of transcription, DNA-templated; F:transferase activity; P:protein modification process; P:protein-containing complex assembly; F:catalytic activity, acting on a protein; F:general transcription initiation factor activity	EC:2.7.1; EC:2.7; EC:2	Transferring phosphorus-containing groups; Transferring phosphorus-containing groups; Transferases	-	-	-	K03120	Basal transcription factors;
EMD68102	105.031	112.543	0	0	54.3934	108.787	0	0	#NAME?	0.039834	1	uncharacterized protein COCSADRAFT_33064	1881	20	0	87.02	-	-	-	-	-	-	-	-	-	-
EMD68097	165.672	164.091	0	0	82.4407	164.881	0	0	#NAME?	0.0195702	1	globin-like protein	1299	20	0	87.81	2	F:GO:0016491; F:GO:0140104	F:oxidoreductase activity; F:molecular carrier activity	EC:1.14.12; EC:1.14.12.17; EC:1; EC:1.14	Acting on paired donors, with incorporation or reduction of molecular oxygen. The oxygen incorporated need not be derived from O(2); Nitric oxide dioxygenase; Oxidoreductases; Acting on paired donors, with incorporation or reduction of molecular oxygen. The oxygen incorporated need not be derived from O(2)	-	-	-	-	-
EMD68063	111.532	138.783	0	0	62.5787	125.157	0	0	#NAME?	0.0313023	1	ubiquitin carrier	1149	20	0	85.63	1	C:GO:0016021	C:integral component of membrane	-	-	-	-	-	-	-
EMD68406	128.34	90.8505	0	0	54.7977	109.595	0	0	#NAME?	0.039325	1	uncharacterized protein COCSADRAFT_272519	270	4	2.20277E-58	95.56	-	-	-	-	-	-	-	-	-	-
EMD68605	426.81	474.662	16.6368	0	229.527	450.736	8.31838	0.0184551	-5.75984	0.0233234	1	c6 transcription factor	912	20	0	93.34	2	C:GO:0005634; F:GO:0140110	C:nucleus; F:transcription regulator activity	-	-	-	-	-	-	-
EMD67641	126.204	143.915	0	0	67.5297	135.059	0	0	#NAME?	0.0274662	1	ubiquitin conjugating enzyme	711	20	1.95733E-154	98.05	9	P:GO:0000278; C:GO:0005634; P:GO:0006325; F:GO:0016740; F:GO:0016874; P:GO:0030163; P:GO:0036211; P:GO:0055085; F:GO:0140096	P:mitotic cell cycle; C:nucleus; P:chromatin organization; F:transferase activity; F:ligase activity; P:protein catabolic process; P:protein modification process; P:transmembrane transport; F:catalytic activity, acting on a protein	EC:2; EC:6	Transferases; Ligases	-	-	-	K02207	Ubiquitin mediated proteolysis;
EMD67136	112.46	113.359	0	0	56.4548	112.91	0	0	#NAME?	0.0373657	1	uncharacterized protein COCSADRAFT_285123	231	20	1.93917E-48	92.5	-	-	-	-	-	-	-	-	-	-
EMD67117	131.126	135.518	0	0	66.661	133.322	0	0	#NAME?	0.0280817	1	DHHA2 domain containing protein	4995	20	0	95.42	1	F:GO:0016787	F:hydrolase activity	EC:3.6.1; EC:3.6; EC:3	Acting on acid anhydrides; Acting on acid anhydrides; Hydrolases	-	-	-	-	-
EMD67872	0	0	33.2735	41.6866	18.74	0	37.48	Inf	Inf	0.0155877	1	PKSKA1	7164	20	0	80.71	4	F:GO:0003723; P:GO:0006629; F:GO:0016491; F:GO:0016740	F:RNA binding; P:lipid metabolic process; F:oxidoreductase activity; F:transferase activity	EC:2.3.1.85; EC:2.3.1.41; EC:2.3; EC:1; EC:2; EC:2.3.1	Fatty-acid synthase; Beta-ketoacyl-[acyl-carrier-protein] synthase I; Acyltransferases; Oxidoreductases; Transferases; Acyltransferases	-	-	-	-	-
EMD67875	0	0	33.2735	20.8433	13.5292	0	27.0584	Inf	Inf	0.0251516	1	putative cytochrome P450	1551	20	0	80.55	2	F:GO:0003723; F:GO:0016491	F:RNA binding; F:oxidoreductase activity	EC:1; EC:1.14	Oxidoreductases; Acting on paired donors, with incorporation or reduction of molecular oxygen. The oxygen incorporated need not be derived from O(2)	-	-	-	-	-
EMD67175	312.214	254.125	0	0	141.585	283.169	0	0	#NAME?	0.00834969	1	uncharacterized protein COCSADRAFT_168399	672	20	2.08737E-147	97.24	-	-	-	-	-	-	-	-	-	-
EMD66956	207.09	226.951	0	0	108.51	217.021	0	0	#NAME?	0.012488	1	Endoplasmic oxidoreductin-1	1851	20	0	93.73	4	C:GO:0005783; P:GO:0006457; F:GO:0016491; F:GO:0140096	C:endoplasmic reticulum; P:protein folding; F:oxidoreductase activity; F:catalytic activity, acting on a protein	EC:1; EC:1.8; EC:1.8.3; EC:1.8.3.2	Oxidoreductases; Acting on a sulfur group of donors; Acting on a sulfur group of donors; Thiol oxidase	-	-	-	K10976	-
EMD66954	487.637	427.895	0	20.8433	234.094	457.766	10.4216	0.0227663	-5.45696	0.0227879	1	predicted protein	573	20	1.57702E-70	84.89	-	-	-	-	-	-	-	-	-	-
EMD67510	1234.37	1222.22	0	41.6866	624.57	1228.3	20.8433	0.0169693	-5.88093	0.0197968	1	glycosyltransferase family 4 protein	2025	20	0	89.07	1	F:GO:0016740	F:transferase activity	EC:2.4; EC:2	Glycosyltransferases; Transferases	-	-	-	-	-
EMD66672	307.85	296.693	8.31838	0	153.215	302.271	4.15919	0.0137598	-6.1834	0.0210282	1	putative MFS-type transporter	1683	20	0	94.12	5	F:GO:0003677; F:GO:0005215; C:GO:0005634; P:GO:0055085; F:GO:0140110	F:DNA binding; F:transporter activity; C:nucleus; P:transmembrane transport; F:transcription regulator activity	EC:7	n/a	-	-	-	-	-
EMD66829	183.595	184.617	0	0	92.053	184.106	0	0	#NAME?	0.0162899	1	c4-dicarboxylate transporter malic acid transport protein	579	20	7.01897E-126	86.38	-	-	-	-	-	-	-	-	-	-
EMD66110	202.726	204.676	0	0	101.85	203.701	0	0	#NAME?	0.0138159	1	uncharacterized protein COCSADRAFT_137372	705	20	6.12095E-172	66.44	1	C:GO:0016021	C:integral component of membrane	-	-	-	-	-	-	-
EMD66098	622.478	623.708	0	0	311.546	623.093	0	0	#NAME?	0.00344853	1	HSP20-like chaperone	1122	20	1.45874E-100	92.6	-	-	-	-	-	-	-	-	K13993	-
EMD66541	142.642	145.314	0	0	71.9889	143.978	0	0	#NAME?	0.0246207	1	putative phosphoribomutase	1752	20	0	96.98	4	P:GO:0005975; F:GO:0016853; P:GO:0055086; P:GO:1901135	P:carbohydrate metabolic process; F:isomerase activity; P:nucleobase-containing small molecule metabolic process; P:carbohydrate derivative metabolic process	EC:5.4; EC:5.4.2.7; EC:5; EC:5.4.2	Intramolecular transferases; Phosphopentomutase; Isomerases; Intramolecular transferases	-	-	-	K01835	Metabolic pathways; Biosynthesis of secondary metabolites; Microbial metabolism in diverse environments; Biosynthesis of nucleotide sugars; Glycolysis_Gluconeogenesis; Pentose phosphate pathway; Galactose metabolism; Starch and sucrose metabolism; Amino sugar and nucleotide sugar metabolism; Purine metabolism; Streptomycin biosynthesis;
EMD66705	97.416	95.1656	0	0	48.1454	96.2908	0	0	#NAME?	0.0490953	1	aureobasidin resistance protein aur1	1347	20	0	97.77	2	F:GO:0016209; F:GO:0016491	F:antioxidant activity; F:oxidoreductase activity	EC:1.11; EC:1; EC:1.11.1	Acting on a peroxide as acceptor; Oxidoreductases; Acting on a peroxide as acceptor	-	-	-	-	-
EMD66320	138.648	145.081	0	0	70.9323	141.865	0	0	#NAME?	0.0252501	1	TRP-domain-containing protein	2208	20	0	93.57	1	C:GO:0016021	C:integral component of membrane	-	-	-	-	-	-	-
EMD66258	289.184	295.293	0	10.4216	148.725	292.238	5.21082	0.0178307	-5.80949	0.0219405	1	alternative oxidase	1074	20	0	94.3	2	C:GO:0005739; F:GO:0016491	C:mitochondrion; F:oxidoreductase activity	EC:1.10; EC:1; EC:1.10.3	Acting on diphenols and related substances as donors; Oxidoreductases; Acting on diphenols and related substances as donors	-	-	-	-	-
EMD66111	87.3865	130.386	0	0	54.4432	108.886	0	0	#NAME?	0.0397759	1	uncharacterized protein COCSADRAFT_34696	192	20	1.20227E-36	92.7	-	-	-	-	-	-	-	-	-	-
EMD66754	182.945	177.269	0	0	90.0536	180.107	0	0	#NAME?	0.0168908	1	nad mitochondrial precursor	1440	20	0	86.55	-	-	-	-	-	-	-	-	-	-
EMD66509	286.212	323.4	16.6368	0	156.562	304.806	8.31838	0.0272907	-5.19544	0.0385349	1	glycoside hydrolase family 128 protein	1419	20	2.83315E-180	90.7	1	F:GO:0016787	F:hydrolase activity	EC:3	Hydrolases	-	-	-	-	-
EMD66015	0	0	16.6368	0	4.15919	0	8.31838	Inf	Inf	0.036904	1	MdlB ABC-type multidrug transport system ATPase and permease component	3987	20	0	92.73	3	F:GO:0005215; P:GO:0055085; F:GO:0140657	F:transporter activity; P:transmembrane transport; F:ATP-dependent activity	EC:7	n/a	-	-	-	K05658	ABC transporters;
EMD65481	3269.24	3547.02	66.547	41.6866	1731.12	3408.13	54.1168	0.0158787	-5.97676	0.0401113	1	carbohydrate-binding module family 18 protein	2442	20	0	90.24	1	F:GO:0008061	F:chitin binding	-	-	-	-	-	-	-
EMD65717	100.481	112.776	0	0	53.3141	106.628	0	0	#NAME?	0.0412299	1	benomyl/methotrexate resistance protein	1593	20	0	95.33	2	F:GO:0005215; P:GO:0055085	F:transporter activity; P:transmembrane transport	EC:7	n/a	-	-	-	-	-
EMD65840	94.4443	117.674	0	0	53.0296	106.059	0	0	#NAME?	0.0416119	1	camp-regulated phospho protein family protein Igo1	375	20	1.05856E-85	80	-	-	-	-	-	-	-	-	-	-
EMD65353	181.831	189.398	0	0	92.8073	185.615	0	0	#NAME?	0.0160728	1	putative opsin-like protein	921	20	0	90.34	4	F:GO:0005215; P:GO:0023052; P:GO:0055085; F:GO:0060089	F:transporter activity; P:signaling; P:transmembrane transport; F:molecular transducer activity	EC:7	n/a	-	-	-	-	-
EMD65374	100.481	111.026	0	0	52.8768	105.754	0	0	#NAME?	0.0418168	1	ribokinase-like protein	981	20	0	90.56	1	F:GO:0016740	F:transferase activity	EC:2.7.1; EC:2.7; EC:2	Transferring phosphorus-containing groups; Transferring phosphorus-containing groups; Transferases	-	-	-	-	-
EMD65754	898.568	854.274	16.6368	20.8433	447.58	876.421	18.74	0.0213824	-5.54743	0.0263248	1	Zinc knuckle	366	17	2.20035E-65	79.46	2	F:GO:0003676; F:GO:0008270	F:nucleic acid binding; F:zinc ion binding	-	-	-	-	-	-	-
EMD65848	0	0	49.9103	83.3732	33.3209	0	66.6417	Inf	Inf	0.00539604	1	D-xylulose 5-phosphate/D-fructose 6-phosphate phosphoketolase	2427	20	0	88.33	2	P:GO:0005975; F:GO:0016829	P:carbohydrate metabolic process; F:lyase activity	EC:4.1.2; EC:4.1; EC:4	Carbon-carbon lyases; Carbon-carbon lyases; Lyases	-	-	-	K01621	Metabolic pathways; Microbial metabolism in diverse environments; Pentose phosphate pathway; Carbon fixation in photosynthetic organisms;
EMD65354	139.206	147.647	0	0	71.713	143.426	0	0	#NAME?	0.0247828	1	carotenoid oxygenase	2130	20	0	90.09	1	F:GO:0016491	F:oxidoreductase activity	EC:1.13.11; EC:1.13; EC:1	Acting on single donors with incorporation of molecular oxygen (oxygenases). The oxygen incorporated need not be derived from O(2); Acting on single donors with incorporation of molecular oxygen (oxygenases). The oxygen incorporated need not be derived from O(2); Oxidoreductases	-	-	-	-	-
EMD64665	198.732	233.482	0	0	108.054	216.107	0	0	#NAME?	0.0125719	1	quinate transport protein	1983	20	6.60518E-161	76.06	-	-	-	-	-	-	-	-	-	-
EMD64891	462.471	540.554	0	0	250.756	501.513	0	0	#NAME?	0.00415291	1	ZnF-C2HC domain containing protein	774	20	6.39415E-168	85.25	2	F:GO:0003676; F:GO:0008270	F:nucleic acid binding; F:zinc ion binding	-	-	-	-	-	-	-
EMD65260	369.234	445.039	0	20.8433	208.779	407.136	10.4216	0.0255974	-5.28786	0.0261812	1	uncharacterized protein COCSADRAFT_160226	189	6	5.51732E-36	91.96	-	-	-	-	-	-	-	-	-	-
EMD64972	803.473	818.47	33.2735	0	413.804	810.972	16.6368	0.0205146	-5.60721	0.0282467	1	hypothetical protein, partial	600	1	8.93835E-06	60	-	-	-	-	-	-	-	-	-	-
EMD65071	94.3515	109.277	0	0	50.9071	101.814	0	0	#NAME?	0.0446306	1	arrestin domain containing protein	2385	20	0	94.46	-	-	-	-	-	-	-	-	-	-
EMD64890	150.721	189.865	0	0	85.1464	170.293	0	0	#NAME?	0.0185414	1	RVT-1 domain containing protein	510	20	5.58627E-85	88.42	-	-	-	-	-	-	-	-	-	-
EMD64341	240.522	263.688	0	0	126.052	252.105	0	0	#NAME?	0.00990718	1	uncharacterized protein COCSADRAFT_89658	225	20	1.47E-46	90.64	1	C:GO:0016021	C:integral component of membrane	-	-	-	-	-	-	-
EMD64159	112.367	170.738	0	0	70.7764	141.553	0	0	#NAME?	0.0253483	1	dna binding protein sart-1	507	5	9.22933E-104	84.88	-	-	-	-	-	-	-	-	-	-
EMD64390	219.906	197.445	0	0	104.338	208.675	0	0	#NAME?	0.0132908	1	ferric reductase	2034	20	0	92.43	1	F:GO:0016491	F:oxidoreductase activity	EC:1.16; EC:1	Oxidizing metal ions; Oxidoreductases	-	-	-	-	-
EMD64249	109.21	115.108	0	0	56.0796	112.159	0	0	#NAME?	0.0377972	1	putative metabolite transport protein	1524	20	0	95.98	2	F:GO:0005215; P:GO:0055085	F:transporter activity; P:transmembrane transport	EC:7	n/a	-	-	-	-	-
EMD64202	396.536	373.665	16.6368	0	196.709	385.1	8.31838	0.0216005	-5.53279	0.0282411	1	putative transcription factor bhlh protein	867	20	4.58138E-164	77.68	1	F:GO:0046983	F:protein dimerization activity	-	-	-	-	-	-	-
EMD64037	98.6233	109.044	0	0	51.9168	103.834	0	0	#NAME?	0.0431524	1	Pre-mRNA-processing-splicing factor 8	7128	20	0	99.6	5	F:GO:0003723; C:GO:0005634; P:GO:0016071; F:GO:0016787; F:GO:0140096	F:RNA binding; C:nucleus; P:mRNA metabolic process; F:hydrolase activity; F:catalytic activity, acting on a protein	EC:3.4; EC:3	Acting on peptide bonds (peptidases); Hydrolases	-	-	-	K12856	Spliceosome;
EMD63525	398.579	402.354	0	0	200.233	400.467	0	0	#NAME?	0.0052953	1	benzoate 4-monooxygenase cytochrome-like protein P450	1491	20	0	86.32	1	F:GO:0016491	F:oxidoreductase activity	EC:1; EC:1.14	Oxidoreductases; Acting on paired donors, with incorporation or reduction of molecular oxygen. The oxygen incorporated need not be derived from O(2)	-	-	-	-	-
EMD63848	117.289	133.069	0	0	62.5894	125.179	0	0	#NAME?	0.0312921	1	uncharacterized protein COCSADRAFT_37598	1215	12	0	72.46	-	-	-	-	-	-	-	-	-	-
EMD63454	146.078	169.222	0	0	78.8249	157.65	0	0	#NAME?	0.0211068	1	uncharacterized protein COCSADRAFT_37239	1905	20	0	85.61	-	-	-	-	-	-	-	-	-	-
EMD63612	265.317	281.415	0	0	136.683	273.366	0	0	#NAME?	0.008787	1	Asp f 13-like protein	417	20	1.91869E-95	87.84	1	C:GO:0005576	C:extracellular region	-	-	-	-	-	-	-
EMD63625	413.066	411.101	0	0	206.042	412.084	0	0	#NAME?	0.00512122	1	DUF4336 domain containing protein	825	20	0	95.11	1	F:GO:0016740	F:transferase activity	EC:2	Transferases	-	-	-	-	-
EMD63611	246.837	300.191	16.6368	0	140.916	273.514	8.31838	0.030413	-5.03917	0.0448844	1	Cupredoxin	621	20	9.23079E-98	89.07	2	P:GO:0006091; F:GO:0016491	P:generation of precursor metabolites and energy; F:oxidoreductase activity	EC:1	Oxidoreductases	-	-	-	-	-
EMD63501	317.322	311.97	16.6368	0	161.482	314.646	8.31838	0.0264372	-5.24128	0.0368818	1	Peptidyl-prolyl cis-trans isomerase-like 4	501	20	2.82869E-91	92.97	1	F:GO:0016853	F:isomerase activity	EC:5	Isomerases	-	-	-	-	-
EMD63419	492.745	578.574	0	0	267.83	535.659	0	0	#NAME?	0.00390378	1	set domain	537	20	7.96133E-115	93.03	1	F:GO:0016740	F:transferase activity	EC:2.7; EC:2	Transferring phosphorus-containing groups; Transferases	-	-	-	-	-
EMD63574	102.245	112.426	0	0	53.6678	107.336	0	0	#NAME?	0.0407641	1	WSC-like protein	1185	20	0	83.4	1	C:GO:0016021	C:integral component of membrane	-	-	-	-	-	K11244	-
EMD63125	460.056	523.411	0	0	245.867	491.733	0	0	#NAME?	0.00423406	1	Calcofluor white hypersensitive	1401	20	0	89.94	-	-	-	-	-	-	-	-	-	-
EMD63022	1173.08	1534.66	33.2735	0	685.253	1353.87	16.6368	0.0122883	-6.34657	0.0183868	1	cdp-alcohol phosphatidyltransferase	642	20	5.20393E-136	87.6	1	F:GO:0016740	F:transferase activity	EC:2	Transferases	-	-	-	-	-
EMD63308	889.653	1065.01	49.9103	0	501.144	977.334	24.9551	0.0255339	-5.29144	0.0387672	1	zinc finger transcription factor	2292	20	0	89.79	-	-	-	-	-	-	-	-	-	-
EMD63040	153.043	177.036	0	0	82.5196	165.039	0	0	#NAME?	0.0195398	1	---NA---	582	-	-	-	-	-	-	-	-	-	-	-	-	-
EMD63212	666.497	722.838	0	20.8433	352.545	694.667	10.4216	0.0150024	-6.05867	0.0151991	1	uncharacterized protein COCSADRAFT_38083	2676	20	0	93.99	4	F:GO:0003723; C:GO:0005634; P:GO:0016071; F:GO:0016740	F:RNA binding; C:nucleus; P:mRNA metabolic process; F:transferase activity	EC:2.1; EC:2; EC:2.1.1	Transferring one-carbon groups; Transferases; Transferring one-carbon groups	-	-	-	-	-
EMD63007	175.702	168.406	0	0	86.0269	172.054	0	0	#NAME?	0.0182241	1	---NA---	264	-	-	-	-	-	-	-	-	-	-	-	-	-
EMD62676	215.448	257.74	0	0	118.297	236.594	0	0	#NAME?	0.0109133	1	HSP20-like chaperone	987	20	6.14453E-175	81.13	-	-	-	-	-	-	-	-	-	-
EMD62424	93.2371	99.1308	0	0	48.092	96.1839	0	0	#NAME?	0.0491899	1	hypothetical protein GGP41_002048	921	20	0	73.8	1	C:GO:0016021	C:integral component of membrane	-	-	-	-	-	-	-
EMD62583	89.8011	101.347	0	0	47.7869	95.5739	0	0	#NAME?	0.049728	1	l-2-hydroxyglutarate dehydrogenase	948	20	7.05357E-166	90.2	-	-	-	-	-	-	-	-	-	-
EMD62637	213.312	184.267	0	0	99.3947	198.789	0	0	#NAME?	0.0143703	1	uncharacterized protein COCSADRAFT_222761	303	20	4.15812E-65	77.71	1	C:GO:0016021	C:integral component of membrane	-	-	-	-	-	-	-
EMD62743	277.111	270.219	0	10.4216	139.438	273.665	5.21082	0.0190409	-5.71476	0.024094	1	victoriocin	552	20	8.98491E-100	64.4	-	-	-	-	-	-	-	-	-	-
EMD62712	93.1442	107.178	0	0	50.0805	100.161	0	0	#NAME?	0.0458995	1	uncharacterized protein COCSADRAFT_223653	1269	20	0	82.66	-	-	-	-	-	-	-	-	-	-
EMD62119	375.549	475.245	8.31838	0	214.778	425.397	4.15919	0.0097772	-6.67636	0.0135102	1	l-serine dehydratase	1512	20	0	95.74	1	C:GO:0016021	C:integral component of membrane	-	-	-	-	-	-	-
EMD62056	112.46	128.054	0	0	60.1285	120.257	0	0	#NAME?	0.0335268	1	ornithine decarboxylase	3078	20	0	74.57	3	F:GO:0003824; P:GO:0006596; P:GO:1901564	F:catalytic activity; P:polyamine biosynthetic process; P:organonitrogen compound metabolic process	-	-	-	-	-	-	-
EMD61924	129.64	134.002	0	0	65.9105	131.821	0	0	#NAME?	0.0286324	1	fungal zn binuclear cluster domain containing protein	2715	20	0	88.09	-	-	-	-	-	-	-	-	-	-
EMD61943	167.622	168.872	0	0	84.1237	168.247	0	0	#NAME?	0.0189184	1	clathrin heavy chain	5058	20	0	97.82	6	F:GO:0005198; C:GO:0005794; C:GO:0005886; P:GO:0006886; P:GO:0016192; C:GO:0031410	F:structural molecule activity; C:Golgi apparatus; C:plasma membrane; P:intracellular protein transport; P:vesicle-mediated transport; C:cytoplasmic vesicle	-	-	-	-	-	K04646	Endocytosis; Lysosome; Bacterial invasion of epithelial cells;
EMD61303	658.046	813.572	16.6368	0	372.064	735.809	8.31838	0.0113051	-6.46689	0.0145407	1	uncharacterized protein COCSADRAFT_39039	732	20	3.75379E-122	70.68	-	-	-	-	-	-	-	-	-	-
EMD61641	326.144	334.945	16.6368	0	169.432	330.545	8.31838	0.0251657	-5.3124	0.0344905	1	MFS general substrate transporter	1866	20	0	94.07	2	F:GO:0005215; P:GO:0055085	F:transporter activity; P:transmembrane transport	EC:7	n/a	-	-	-	-	-
EMD61525	133.076	126.887	0	0	64.991	129.982	0	0	#NAME?	0.0293304	1	uncharacterized protein COCSADRAFT_39244	7281	20	0	88.69	2	F:GO:0005215; P:GO:0055085	F:transporter activity; P:transmembrane transport	EC:7	n/a	-	-	-	-	-
EMD61266	707.45	757.942	0	10.4216	368.954	732.696	5.21082	0.00711185	-7.13556	0.00810443	1	NRDE protein-domain-containing protein	957	20	0	94.06	-	-	-	-	-	-	-	-	-	-
EMD61245	2.60024	2.91561	1231.12	396.023	408.165	2.75792	813.571	294.994	8.20454	0.0404144	1	P-type cation-transporting	2844	20	0	88.72	4	F:GO:0005215; F:GO:0016787; P:GO:0055085; F:GO:0140657	F:transporter activity; F:hydrolase activity; P:transmembrane transport; F:ATP-dependent activity	EC:3.6.1; EC:3.6; EC:3; EC:7	Acting on acid anhydrides; Acting on acid anhydrides; Hydrolases; n/a	-	-	-	-	-
EMD60302	856.407	995.39	8.31838	0	465.029	925.898	4.15919	0.00449206	-7.79841	0.00684102	1	Hexose transporter HXT13	1713	20	0	95.18	2	F:GO:0005215; P:GO:0055085	F:transporter activity; P:transmembrane transport	EC:7	n/a	-	-	-	K08139	-
EMD60673	0	0	8.31838	0	2.07959	0	4.15919	Inf	Inf	0.0221045	1	vegetative incompatibility het-e-1	153	20	1.19641E-25	94.09	-	-	-	-	-	-	-	-	-	-
EMD60497	118.218	120.356	0	0	59.6436	119.287	0	0	#NAME?	0.0339958	1	putative proline-specific permease put4	1692	20	0	95.43	1	P:GO:0055085	P:transmembrane transport	-	-	-	-	-	-	-
EMD60644	94.9087	96.4484	0	0	47.8393	95.6785	0	0	#NAME?	0.0496334	1	multicopper oxidase	2208	20	0	90.83	1	F:GO:0016491	F:oxidoreductase activity	EC:1	Oxidoreductases	-	-	-	-	-
EMD60725	164.465	236.281	0	0	100.187	200.373	0	0	#NAME?	0.0141894	1	putative ricin b lectin protein	510	20	1.31244E-121	95.37	3	F:GO:0016787; F:GO:0016874; F:GO:0140096	F:hydrolase activity; F:ligase activity; F:catalytic activity, acting on a protein	EC:3.4; EC:3; EC:6	Acting on peptide bonds (peptidases); Hydrolases; Ligases	-	-	-	-	-
EMD60677	120.075	125.838	0	0	61.4783	122.957	0	0	#NAME?	0.0322699	1	vacuolar calcium ion transporter /H(+) exchanger	2286	20	0	90.56	2	F:GO:0005215; P:GO:0055085	F:transporter activity; P:transmembrane transport	EC:7	n/a	-	-	-	-	-
EMD60343	103.638	95.5154	0	0	49.7884	99.5767	0	0	#NAME?	0.0463579	1	transmembrane BAX inhibitor motif-containing protein 4	837	20	0	93.79	5	C:GO:0005739; C:GO:0005773; C:GO:0005783; P:GO:0012501; P:GO:0023052	C:mitochondrion; C:vacuole; C:endoplasmic reticulum; P:programmed cell death; P:signaling	-	-	-	-	-	-	-
EMD60084	198.082	187.299	8.31838	0	98.4249	192.691	4.15919	0.0215848	-5.53384	0.0412754	1	Mid2 domain containing protein	948	20	4.62733E-59	86.75	1	C:GO:0016021	C:integral component of membrane	-	-	-	-	-	-	-
EMD60043	322.615	472.679	0	20.8433	204.034	397.647	10.4216	0.0262083	-5.25383	0.0269528	1	gpi anchored serine-threonine rich protein	510	20	7.26295E-48	94.12	-	-	-	-	-	-	-	-	-	-
EMD59859	115.246	129.803	0	0	61.2623	122.525	0	0	#NAME?	0.0324666	1	2,3-diketo-5-methylthio-1-phosphopentane phosphatase	663	20	5.08746E-161	90.52	3	P:GO:0006520; P:GO:0006790; F:GO:0016787	P:cellular amino acid metabolic process; P:sulfur compound metabolic process; F:hydrolase activity	EC:3.1; EC:3; EC:3.1.3.77; EC:3.1.3	Acting on ester bonds; Hydrolases; Acireductone synthase; Acting on ester bonds	-	-	-	K09880	Metabolic pathways; Cysteine and methionine metabolism;
EMD60179	99.6448	102.63	0	0	50.5686	101.137	0	0	#NAME?	0.0451419	1	CopZ Copper chaperone	237	20	3.50715E-48	97.12	1	F:GO:0045182	F:translation regulator activity	-	-	-	-	-	K07213	-
EMD60216	114.875	142.282	0	0	64.2892	128.578	0	0	#NAME?	0.0298849	1	uncharacterized protein COCSADRAFT_40657	591	5	6.8402E-135	66.21	-	-	-	-	-	-	-	-	-	-
EMD60007	106.703	122.456	0	0	57.2896	114.579	0	0	#NAME?	0.0364358	1	glycosylphosphatidylinositol anchored cell wall protein	552	20	2.32232E-66	72.85	-	-	-	-	-	-	-	-	-	-
EMD59828	101.502	105.895	0	0	51.8493	103.699	0	0	#NAME?	0.0432479	1	udp-glucose 4-epimerase	1410	20	0	93.44	2	P:GO:0005975; F:GO:0016853	P:carbohydrate metabolic process; F:isomerase activity	EC:5.1.3.7; EC:5.1; EC:5; EC:5.1.3; EC:5.1.3.2	UDP-N-acetylglucosamine 4-epimerase; Racemases and epimerases; Isomerases; Racemases and epimerases; UDP-glucose 4-epimerase	-	-	-	K01784	Metabolic pathways; Biosynthesis of nucleotide sugars; Galactose metabolism; Amino sugar and nucleotide sugar metabolism; O-Antigen nucleotide sugar biosynthesis;
EMD59831	221.206	233.482	0	0	113.672	227.344	0	0	#NAME?	0.0116087	1	glycosyltransferase family 4 protein	9186	20	0	89.66	1	F:GO:0016740	F:transferase activity	EC:2	Transferases	-	-	-	-	-
EMD59830	1046.22	1248	16.6368	20.8433	582.926	1147.11	18.74	0.0163367	-5.93574	0.0209518	1	extracellular serine-rich protein	2070	20	0	91.68	3	P:GO:0005975; F:GO:0016787; F:GO:0016853	P:carbohydrate metabolic process; F:hydrolase activity; F:isomerase activity	EC:3.2; EC:3; EC:5; EC:3.2.1.22; EC:3.2.1	Glycosylases; Hydrolases; Isomerases; Alpha-galactosidase; Glycosylases	-	-	-	-	-
EMD59656	634.551	697.881	0	0	333.108	666.216	0	0	#NAME?	0.00329322	1	cytochrome P450 monooxygenase-like protein	1539	20	0	79.19	1	F:GO:0016491	F:oxidoreductase activity	EC:1; EC:1.14	Oxidoreductases; Acting on paired donors, with incorporation or reduction of molecular oxygen. The oxygen incorporated need not be derived from O(2)	-	-	-	-	-
EMD59272	0	0.233249	83.1838	20.8433	26.0651	0.116624	52.0135	445.992	8.80087	0.0257182	1	HET-domain-containing protein	810	20	0	78	-	-	-	-	-	-	-	-	-	-
EMD59238	544.378	512.331	0	0	264.177	528.355	0	0	#NAME?	0.00395275	1	g-protein beta wd-40 repeat-containing protein	1914	20	0	72.9	-	-	-	-	-	-	-	-	-	-
EMD59067	120.911	121.756	0	0	60.6667	121.333	0	0	#NAME?	0.0330155	1	uncharacterized protein COCSADRAFT_263112	1266	20	0	78.65	1	C:GO:0016021	C:integral component of membrane	-	-	-	-	-	-	-
EMD58903	220.927	232.199	0	0	113.282	226.563	0	0	#NAME?	0.0116711	1	lipase/serine esteras-like protein	1335	20	0	90.66	1	P:GO:0006629	P:lipid metabolic process	-	-	-	-	-	-	-
EMD58945	1567.76	1532.21	16.6368	20.8433	784.362	1549.98	18.74	0.0120905	-6.36999	0.0165904	1	siderophore iron transporter mirC	3156	20	0	87.35	2	F:GO:0005215; P:GO:0055085	F:transporter activity; P:transmembrane transport	EC:7	n/a	-	-	-	K08139	-
EMD58801	192.232	217.038	0	0	102.317	204.635	0	0	#NAME?	0.0137151	1	DNAJ domain containing protein	1788	20	0	78.92	-	-	-	-	-	-	-	-	-	-
EMD59012	150.535	138.433	0	0	72.2421	144.484	0	0	#NAME?	0.0244729	1	uncharacterized protein COCSADRAFT_204080	426	20	4.98088E-98	65.7	-	-	-	-	-	-	-	-	-	-
EMD58862	100.016	104.845	0	0	51.2154	102.431	0	0	#NAME?	0.0441697	1	indoleamine 2,3-dioxygenase alpha type	1473	20	0	95.81	3	P:GO:0006520; F:GO:0016491; P:GO:0055086	P:cellular amino acid metabolic process; F:oxidoreductase activity; P:nucleobase-containing small molecule metabolic process	EC:1.13.11; EC:1.13; EC:1.13.11.52; EC:1	Acting on single donors with incorporation of molecular oxygen (oxygenases). The oxygen incorporated need not be derived from O(2); Acting on single donors with incorporation of molecular oxygen (oxygenases). The oxygen incorporated need not be derived from O(2); Indoleamine 2,3-dioxygenase; Oxidoreductases	-	-	-	K00463	Metabolic pathways; Biosynthesis of cofactors; Tryptophan metabolism;
EMD58860	414.831	376.814	24.9551	0	204.15	395.822	12.4776	0.0315232	-4.98744	0.0424072	1	plasma membrane proteolipid 3	1245	20	0	81.23	1	C:GO:0016021	C:integral component of membrane	-	-	-	-	-	-	-
EMD59047	514.011	572.976	8.31838	20.8433	279.037	543.494	14.5808	0.026828	-5.22012	0.0292659	1	gtp-binding protein 1	3441	20	0	93.94	2	F:GO:0003924; P:GO:0006520	F:GTPase activity; P:cellular amino acid metabolic process	EC:3.6.1; EC:3.6; EC:3	Acting on acid anhydrides; Acting on acid anhydrides; Hydrolases	-	-	-	-	-
EMD58563	943.7	1150.85	0	0	523.638	1047.28	0	0	#NAME?	0.00248484	1	inositolphosphorylceramide-B C-26 hydroxylase	1179	20	0	94.78	6	F:GO:0003723; C:GO:0005634; C:GO:0005783; P:GO:0006629; P:GO:0016071; F:GO:0016491	F:RNA binding; C:nucleus; C:endoplasmic reticulum; P:lipid metabolic process; P:mRNA metabolic process; F:oxidoreductase activity	EC:1	Oxidoreductases	-	-	-	-	-
EMD58636	319.365	335.878	0	20.8433	169.022	327.622	10.4216	0.03181	-4.97438	0.0346076	1	uncharacterized protein COCSADRAFT_41750	762	20	1.02429E-112	72.33	-	-	-	-	-	-	-	-	-	-
EMD58720	280.547	306.372	0	0	146.73	293.46	0	0	#NAME?	0.0079366	1	Gag/polymerase/env polyprotein	294	20	6.85675E-66	86.15	3	F:GO:0003723; C:GO:0005634; P:GO:0006325	F:RNA binding; C:nucleus; P:chromatin organization	-	-	-	-	-	-	-
EMD58494	389.2	390.809	16.6368	0	199.161	390.004	8.31838	0.0213289	-5.55104	0.0277942	1	alpha beta-hydrolase	540	20	4.631E-68	81.69	2	P:GO:0006520; F:GO:0016787	P:cellular amino acid metabolic process; F:hydrolase activity	EC:3	Hydrolases	-	-	-	-	-
EMD58355	315.743	374.831	0	0	172.644	345.287	0	0	#NAME?	0.00636526	1	Zinc knuckle	165	15	3.67838E-30	89.83	-	-	-	-	-	-	-	-	-	-
EMD58228	100.388	95.8653	0	0	49.0633	98.1265	0	0	#NAME?	0.0475363	1	WD40-repeat-containing domain protein	4500	20	0	77.49	1	C:GO:0031410	C:cytoplasmic vesicle	-	-	-	-	-	-	-
EMD58201	0	0	16.6368	0	4.15919	0	8.31838	Inf	Inf	0.036904	1	Fungal-trans domain-containing protein	2064	20	0	75.82	2	C:GO:0005634; F:GO:0140110	C:nucleus; F:transcription regulator activity	-	-	-	-	-	-	-
EMD58200	0	0	16.6368	0	4.15919	0	8.31838	Inf	Inf	0.036904	1	Fungal-trans domain containing protein	1896	20	0	73.51	5	F:GO:0000981; C:GO:0005634; P:GO:0006355; P:GO:0006357; F:GO:0008270	F:DNA-binding transcription factor activity, RNA polymerase II-specific; C:nucleus; P:regulation of transcription, DNA-templated; P:regulation of transcription by RNA polymerase II; F:zinc ion binding	-	-	-	-	-	-	-
EMD58078	496.924	506.034	0	20.8433	255.95	501.479	10.4216	0.0207818	-5.58853	0.0205953	1	Zinc knuckle	390	19	1.52965E-87	72.54	2	F:GO:0003676; F:GO:0008270	F:nucleic acid binding; F:zinc ion binding	-	-	-	-	-	-	-
EMD58070	239.872	290.861	0	10.4216	135.289	265.367	5.21082	0.0196363	-5.67033	0.0251952	1	retropepsin-like domain-containing protein	324	20	3.26868E-71	86.72	-	-	-	-	-	-	-	-	-	-

## Sheet: BS_RI Upregulated
genes	BS.1	BS.2	RI.1	RI.2	normalised_count	normalised_count_BS	normalised_count_RI	foldChange	log2FoldChange	pval	padj	Description	Length	#Hits	e-Value	sim mean	#GO	GO IDs	GO Names	Enzyme Codes	Enzyme Names	InterPro IDs	InterPro GO IDs	InterPro GO Names	Cross-reference (KO)	KEGG-pathways
EMD67872	0	0	33.2735	41.6866	18.74	0	37.48	Inf	Inf	0.0155877	1	PKSKA1	7164	20	0	80.71	4	F:GO:0003723; P:GO:0006629; F:GO:0016491; F:GO:0016740	F:RNA binding; P:lipid metabolic process; F:oxidoreductase activity; F:transferase activity	EC:2.3.1.85; EC:2.3.1.41; EC:2.3; EC:1; EC:2; EC:2.3.1	Fatty-acid synthase; Beta-ketoacyl-[acyl-carrier-protein] synthase I; Acyltransferases; Oxidoreductases; Transferases; Acyltransferases	-	-	-	-	-
EMD67875	0	0	33.2735	20.8433	13.5292	0	27.0584	Inf	Inf	0.0251516	1	putative cytochrome P450	1551	20	0	80.55	2	F:GO:0003723; F:GO:0016491	F:RNA binding; F:oxidoreductase activity	EC:1; EC:1.14	Oxidoreductases; Acting on paired donors, with incorporation or reduction of molecular oxygen. The oxygen incorporated need not be derived from O(2)	-	-	-	-	-
EMD66015	0	0	16.6368	0	4.15919	0	8.31838	Inf	Inf	0.036904	1	MdlB ABC-type multidrug transport system ATPase and permease component	3987	20	0	92.73	3	F:GO:0005215; P:GO:0055085; F:GO:0140657	F:transporter activity; P:transmembrane transport; F:ATP-dependent activity	EC:7	n/a	-	-	-	K05658	ABC transporters;
EMD65848	0	0	49.9103	83.3732	33.3209	0	66.6417	Inf	Inf	0.00539604	1	D-xylulose 5-phosphate/D-fructose 6-phosphate phosphoketolase	2427	20	0	88.33	2	P:GO:0005975; F:GO:0016829	P:carbohydrate metabolic process; F:lyase activity	EC:4.1.2; EC:4.1; EC:4	Carbon-carbon lyases; Carbon-carbon lyases; Lyases	-	-	-	K01621	Metabolic pathways; Microbial metabolism in diverse environments; Pentose phosphate pathway; Carbon fixation in photosynthetic organisms;
EMD61245	2.60024	2.91561	1231.12	396.023	408.165	2.75792	813.571	294.994	8.20454	0.0404144	1	P-type cation-transporting	2844	20	0	88.72	4	F:GO:0005215; F:GO:0016787; P:GO:0055085; F:GO:0140657	F:transporter activity; F:hydrolase activity; P:transmembrane transport; F:ATP-dependent activity	EC:3.6.1; EC:3.6; EC:3; EC:7	Acting on acid anhydrides; Acting on acid anhydrides; Hydrolases; n/a	-	-	-	-	-
EMD60673	0	0	8.31838	0	2.07959	0	4.15919	Inf	Inf	0.0221045	1	vegetative incompatibility het-e-1	153	20	1.19641E-25	94.09	-	-	-	-	-	-	-	-	-	-
EMD59272	0	0.233249	83.1838	20.8433	26.0651	0.116624	52.0135	445.992	8.80087	0.0257182	1	HET-domain-containing protein	810	20	0	78	-	-	-	-	-	-	-	-	-	-
EMD58201	0	0	16.6368	0	4.15919	0	8.31838	Inf	Inf	0.036904	1	Fungal-trans domain-containing protein	2064	20	0	75.82	2	C:GO:0005634; F:GO:0140110	C:nucleus; F:transcription regulator activity	-	-	-	-	-	-	-
EMD58200	0	0	16.6368	0	4.15919	0	8.31838	Inf	Inf	0.036904	1	Fungal-trans domain containing protein	1896	20	0	73.51	5	F:GO:0000981; C:GO:0005634; P:GO:0006355; P:GO:0006357; F:GO:0008270	F:DNA-binding transcription factor activity, RNA polymerase II-specific; C:nucleus; P:regulation of transcription, DNA-templated; P:regulation of transcription by RNA polymerase II; F:zinc ion binding	-	-	-	-	-	-	-

## Sheet: BS_RI Downregulated
genes	BS.1	BS.2	RI.1	RI.2	normalised_count	normalised_count_BS	normalised_count_RI	foldChange	log2FoldChange	pval	padj	Description	Length	#Hits	e-Value	sim mean	#GO	GO IDs	GO Names	Enzyme Codes	Enzyme Names	InterPro IDs	InterPro GO IDs	InterPro GO Names	Cross-reference (KO)	KEGG-pathways
EMD69150	115.246	149.396	0	0	66.1605	132.321	0	0	#NAME?	0.0284492	1	NAD(P)-binding protein	771	20	2.27054E-174	95.69	4	F:GO:0016491; F:GO:0016740; P:GO:0036211; F:GO:0140096	F:oxidoreductase activity; F:transferase activity; P:protein modification process; F:catalytic activity, acting on a protein	EC:2.7.1; EC:1; EC:2.7; EC:2	Transferring phosphorus-containing groups; Oxidoreductases; Transferring phosphorus-containing groups; Transferases	-	-	-	-	-
EMD69701	394.957	388.476	16.6368	0	200.018	391.717	8.31838	0.0212357	-5.55737	0.0276414	1	glycoside hydrolase family 16 protein	1365	20	0	91.46	2	P:GO:0005975; F:GO:0016787	P:carbohydrate metabolic process; F:hydrolase activity	EC:3.2; EC:3; EC:3.2.1	Glycosylases; Hydrolases; Glycosylases	-	-	-	-	-
EMD68979	234.021	230.8	0	0	116.205	232.411	0	0	#NAME?	0.0112174	1	uncharacterized protein COCSADRAFT_176835	519	20	5.0066E-106	74.89	-	-	-	-	-	-	-	-	-	-
EMD69143	654.703	669.891	16.6368	0	335.308	662.297	8.31838	0.0125599	-6.31503	0.0158431	1	uncharacterized protein COCSADRAFT_31904	465	20	4.48046E-67	82.07	-	-	-	-	-	-	-	-	-	-
EMD70145	134.841	113.242	0	0	62.0208	124.042	0	0	#NAME?	0.0317837	1	TRP-domain-containing protein	2178	20	0	95.81	1	F:GO:0016874	F:ligase activity	EC:6	Ligases	-	-	-	-	-
EMD69144	162.236	179.952	0	0	85.5469	171.094	0	0	#NAME?	0.0183959	1	uncharacterized protein COCSADRAFT_186131	381	20	2.87811E-87	72.34	2	C:GO:0016020; C:GO:0016021	C:membrane; C:integral component of membrane	-	-	-	-	-	-	-
EMD69199	101.038	103.213	0	0	51.0626	102.125	0	0	#NAME?	0.0443961	1	Calcipressin-domain-containing protein	783	20	1.77922E-165	96.72	1	P:GO:0023052	P:signaling	-	-	-	-	-	-	-
EMD70004	193.903	188.815	0	10.4216	98.285	191.359	5.21082	0.0272306	-5.19863	0.0413715	1	carbohydrate-binding module family 43 protein	1674	20	0	89.25	3	C:GO:0005886; F:GO:0016740; P:GO:0071554	C:plasma membrane; F:transferase activity; P:cell wall organization or biogenesis	EC:2	Transferases	-	-	-	-	-
EMD69284	296.241	298.559	0	0	148.7	297.4	0	0	#NAME?	0.00778877	1	FAS1 domain-containing protein	1356	20	0	87.53	-	-	-	-	-	-	-	-	-	-
EMD70119	316.022	358.387	16.6368	0	172.761	337.204	8.31838	0.0246687	-5.34118	0.0335794	1	von Willebrand domain containing protein	2712	20	0	86.18	1	C:GO:0005635	C:nuclear envelope	-	-	-	-	-	-	-
EMD69264	263.831	309.171	0	0	143.251	286.501	0	0	#NAME?	0.00821191	1	NAC-domain-containing protein	690	20	1.58348E-128	81.5	1	C:GO:0005634	C:nucleus	-	-	-	-	-	-	-
EMD68918	2642.96	2696.12	33.2735	0	1343.09	2669.54	16.6368	0.00623207	-7.32607	0.0129116	1	pyruvate decarboxylase	1722	20	0	97.21	1	F:GO:0016829	F:lyase activity	EC:4.1.1; EC:4.1.1.1; EC:4.1; EC:4	Carbon-carbon lyases; Pyruvate decarboxylase; Carbon-carbon lyases; Lyases	-	-	-	K01568	Metabolic pathways; Biosynthesis of secondary metabolites; Glycolysis_Gluconeogenesis;
EMD68321	560.258	632.454	16.6368	20.8433	307.548	596.356	18.74	0.0314242	-4.99198	0.0373081	1	tyrosinase family protein	861	20	0	80.89	1	F:GO:0016491	F:oxidoreductase activity	EC:1	Oxidoreductases	-	-	-	K00505	Metabolic pathways; Biosynthesis of secondary metabolites; Tyrosine metabolism; Isoquinoline alkaloid biosynthesis; Betalain biosynthesis;
EMD68142	112.553	113.592	0	0	56.5363	113.073	0	0	#NAME?	0.0372731	1	CTP-transf-1 domain containing protein	1431	20	0	93.39	2	F:GO:0016740; F:GO:0016874	F:transferase activity; F:ligase activity	EC:2.7.1; EC:2.7; EC:2; EC:2.7.7; EC:6; EC:2.7.1.107	Transferring phosphorus-containing groups; Transferring phosphorus-containing groups; Transferases; Transferring phosphorus-containing groups; Ligases; Diacylglycerol kinase (ATP)	-	-	-	K16368	Metabolic pathways; Biosynthesis of secondary metabolites; Glycerophospholipid metabolism;
EMD68022	199.661	244.561	0	0	111.056	222.111	0	0	#NAME?	0.0120402	1	tata-box-binding protein	750	20	0	98.36	9	F:GO:0003677; C:GO:0005654; C:GO:0005730; P:GO:0006355; F:GO:0016740; P:GO:0036211; P:GO:0065003; F:GO:0140096; F:GO:0140223	F:DNA binding; C:nucleoplasm; C:nucleolus; P:regulation of transcription, DNA-templated; F:transferase activity; P:protein modification process; P:protein-containing complex assembly; F:catalytic activity, acting on a protein; F:general transcription initiation factor activity	EC:2.7.1; EC:2.7; EC:2	Transferring phosphorus-containing groups; Transferring phosphorus-containing groups; Transferases	-	-	-	K03120	Basal transcription factors;
EMD68102	105.031	112.543	0	0	54.3934	108.787	0	0	#NAME?	0.039834	1	uncharacterized protein COCSADRAFT_33064	1881	20	0	87.02	-	-	-	-	-	-	-	-	-	-
EMD68097	165.672	164.091	0	0	82.4407	164.881	0	0	#NAME?	0.0195702	1	globin-like protein	1299	20	0	87.81	2	F:GO:0016491; F:GO:0140104	F:oxidoreductase activity; F:molecular carrier activity	EC:1.14.12; EC:1.14.12.17; EC:1; EC:1.14	Acting on paired donors, with incorporation or reduction of molecular oxygen. The oxygen incorporated need not be derived from O(2); Nitric oxide dioxygenase; Oxidoreductases; Acting on paired donors, with incorporation or reduction of molecular oxygen. The oxygen incorporated need not be derived from O(2)	-	-	-	-	-
EMD68063	111.532	138.783	0	0	62.5787	125.157	0	0	#NAME?	0.0313023	1	ubiquitin carrier	1149	20	0	85.63	1	C:GO:0016021	C:integral component of membrane	-	-	-	-	-	-	-
EMD68406	128.34	90.8505	0	0	54.7977	109.595	0	0	#NAME?	0.039325	1	uncharacterized protein COCSADRAFT_272519	270	4	2.20277E-58	95.56	-	-	-	-	-	-	-	-	-	-
EMD68605	426.81	474.662	16.6368	0	229.527	450.736	8.31838	0.0184551	-5.75984	0.0233234	1	c6 transcription factor	912	20	0	93.34	2	C:GO:0005634; F:GO:0140110	C:nucleus; F:transcription regulator activity	-	-	-	-	-	-	-
EMD67641	126.204	143.915	0	0	67.5297	135.059	0	0	#NAME?	0.0274662	1	ubiquitin conjugating enzyme	711	20	1.95733E-154	98.05	9	P:GO:0000278; C:GO:0005634; P:GO:0006325; F:GO:0016740; F:GO:0016874; P:GO:0030163; P:GO:0036211; P:GO:0055085; F:GO:0140096	P:mitotic cell cycle; C:nucleus; P:chromatin organization; F:transferase activity; F:ligase activity; P:protein catabolic process; P:protein modification process; P:transmembrane transport; F:catalytic activity, acting on a protein	EC:2; EC:6	Transferases; Ligases	-	-	-	K02207	Ubiquitin mediated proteolysis;
EMD67136	112.46	113.359	0	0	56.4548	112.91	0	0	#NAME?	0.0373657	1	uncharacterized protein COCSADRAFT_285123	231	20	1.93917E-48	92.5	-	-	-	-	-	-	-	-	-	-
EMD67117	131.126	135.518	0	0	66.661	133.322	0	0	#NAME?	0.0280817	1	DHHA2 domain containing protein	4995	20	0	95.42	1	F:GO:0016787	F:hydrolase activity	EC:3.6.1; EC:3.6; EC:3	Acting on acid anhydrides; Acting on acid anhydrides; Hydrolases	-	-	-	-	-
EMD67175	312.214	254.125	0	0	141.585	283.169	0	0	#NAME?	0.00834969	1	uncharacterized protein COCSADRAFT_168399	672	20	2.08737E-147	97.24	-	-	-	-	-	-	-	-	-	-
EMD66956	207.09	226.951	0	0	108.51	217.021	0	0	#NAME?	0.012488	1	Endoplasmic oxidoreductin-1	1851	20	0	93.73	4	C:GO:0005783; P:GO:0006457; F:GO:0016491; F:GO:0140096	C:endoplasmic reticulum; P:protein folding; F:oxidoreductase activity; F:catalytic activity, acting on a protein	EC:1; EC:1.8; EC:1.8.3; EC:1.8.3.2	Oxidoreductases; Acting on a sulfur group of donors; Acting on a sulfur group of donors; Thiol oxidase	-	-	-	K10976	-
EMD66954	487.637	427.895	0	20.8433	234.094	457.766	10.4216	0.0227663	-5.45696	0.0227879	1	predicted protein	573	20	1.57702E-70	84.89	-	-	-	-	-	-	-	-	-	-
EMD67510	1234.37	1222.22	0	41.6866	624.57	1228.3	20.8433	0.0169693	-5.88093	0.0197968	1	glycosyltransferase family 4 protein	2025	20	0	89.07	1	F:GO:0016740	F:transferase activity	EC:2.4; EC:2	Glycosyltransferases; Transferases	-	-	-	-	-
EMD66672	307.85	296.693	8.31838	0	153.215	302.271	4.15919	0.0137598	-6.1834	0.0210282	1	putative MFS-type transporter	1683	20	0	94.12	5	F:GO:0003677; F:GO:0005215; C:GO:0005634; P:GO:0055085; F:GO:0140110	F:DNA binding; F:transporter activity; C:nucleus; P:transmembrane transport; F:transcription regulator activity	EC:7	n/a	-	-	-	-	-
EMD66829	183.595	184.617	0	0	92.053	184.106	0	0	#NAME?	0.0162899	1	c4-dicarboxylate transporter malic acid transport protein	579	20	7.01897E-126	86.38	-	-	-	-	-	-	-	-	-	-
EMD66110	202.726	204.676	0	0	101.85	203.701	0	0	#NAME?	0.0138159	1	uncharacterized protein COCSADRAFT_137372	705	20	6.12095E-172	66.44	1	C:GO:0016021	C:integral component of membrane	-	-	-	-	-	-	-
EMD66098	622.478	623.708	0	0	311.546	623.093	0	0	#NAME?	0.00344853	1	HSP20-like chaperone	1122	20	1.45874E-100	92.6	-	-	-	-	-	-	-	-	K13993	-
EMD66541	142.642	145.314	0	0	71.9889	143.978	0	0	#NAME?	0.0246207	1	putative phosphoribomutase	1752	20	0	96.98	4	P:GO:0005975; F:GO:0016853; P:GO:0055086; P:GO:1901135	P:carbohydrate metabolic process; F:isomerase activity; P:nucleobase-containing small molecule metabolic process; P:carbohydrate derivative metabolic process	EC:5.4; EC:5.4.2.7; EC:5; EC:5.4.2	Intramolecular transferases; Phosphopentomutase; Isomerases; Intramolecular transferases	-	-	-	K01835	Metabolic pathways; Biosynthesis of secondary metabolites; Microbial metabolism in diverse environments; Biosynthesis of nucleotide sugars; Glycolysis_Gluconeogenesis; Pentose phosphate pathway; Galactose metabolism; Starch and sucrose metabolism; Amino sugar and nucleotide sugar metabolism; Purine metabolism; Streptomycin biosynthesis;
EMD66705	97.416	95.1656	0	0	48.1454	96.2908	0	0	#NAME?	0.0490953	1	aureobasidin resistance protein aur1	1347	20	0	97.77	2	F:GO:0016209; F:GO:0016491	F:antioxidant activity; F:oxidoreductase activity	EC:1.11; EC:1; EC:1.11.1	Acting on a peroxide as acceptor; Oxidoreductases; Acting on a peroxide as acceptor	-	-	-	-	-
EMD66320	138.648	145.081	0	0	70.9323	141.865	0	0	#NAME?	0.0252501	1	TRP-domain-containing protein	2208	20	0	93.57	1	C:GO:0016021	C:integral component of membrane	-	-	-	-	-	-	-
EMD66258	289.184	295.293	0	10.4216	148.725	292.238	5.21082	0.0178307	-5.80949	0.0219405	1	alternative oxidase	1074	20	0	94.3	2	C:GO:0005739; F:GO:0016491	C:mitochondrion; F:oxidoreductase activity	EC:1.10; EC:1; EC:1.10.3	Acting on diphenols and related substances as donors; Oxidoreductases; Acting on diphenols and related substances as donors	-	-	-	-	-
EMD66111	87.3865	130.386	0	0	54.4432	108.886	0	0	#NAME?	0.0397759	1	uncharacterized protein COCSADRAFT_34696	192	20	1.20227E-36	92.7	-	-	-	-	-	-	-	-	-	-
EMD66754	182.945	177.269	0	0	90.0536	180.107	0	0	#NAME?	0.0168908	1	nad mitochondrial precursor	1440	20	0	86.55	-	-	-	-	-	-	-	-	-	-
EMD66509	286.212	323.4	16.6368	0	156.562	304.806	8.31838	0.0272907	-5.19544	0.0385349	1	glycoside hydrolase family 128 protein	1419	20	2.83315E-180	90.7	1	F:GO:0016787	F:hydrolase activity	EC:3	Hydrolases	-	-	-	-	-
EMD65481	3269.24	3547.02	66.547	41.6866	1731.12	3408.13	54.1168	0.0158787	-5.97676	0.0401113	1	carbohydrate-binding module family 18 protein	2442	20	0	90.24	1	F:GO:0008061	F:chitin binding	-	-	-	-	-	-	-
EMD65717	100.481	112.776	0	0	53.3141	106.628	0	0	#NAME?	0.0412299	1	benomyl/methotrexate resistance protein	1593	20	0	95.33	2	F:GO:0005215; P:GO:0055085	F:transporter activity; P:transmembrane transport	EC:7	n/a	-	-	-	-	-
EMD65840	94.4443	117.674	0	0	53.0296	106.059	0	0	#NAME?	0.0416119	1	camp-regulated phospho protein family protein Igo1	375	20	1.05856E-85	80	-	-	-	-	-	-	-	-	-	-
EMD65353	181.831	189.398	0	0	92.8073	185.615	0	0	#NAME?	0.0160728	1	putative opsin-like protein	921	20	0	90.34	4	F:GO:0005215; P:GO:0023052; P:GO:0055085; F:GO:0060089	F:transporter activity; P:signaling; P:transmembrane transport; F:molecular transducer activity	EC:7	n/a	-	-	-	-	-
EMD65374	100.481	111.026	0	0	52.8768	105.754	0	0	#NAME?	0.0418168	1	ribokinase-like protein	981	20	0	90.56	1	F:GO:0016740	F:transferase activity	EC:2.7.1; EC:2.7; EC:2	Transferring phosphorus-containing groups; Transferring phosphorus-containing groups; Transferases	-	-	-	-	-
EMD65754	898.568	854.274	16.6368	20.8433	447.58	876.421	18.74	0.0213824	-5.54743	0.0263248	1	Zinc knuckle	366	17	2.20035E-65	79.46	2	F:GO:0003676; F:GO:0008270	F:nucleic acid binding; F:zinc ion binding	-	-	-	-	-	-	-
EMD65354	139.206	147.647	0	0	71.713	143.426	0	0	#NAME?	0.0247828	1	carotenoid oxygenase	2130	20	0	90.09	1	F:GO:0016491	F:oxidoreductase activity	EC:1.13.11; EC:1.13; EC:1	Acting on single donors with incorporation of molecular oxygen (oxygenases). The oxygen incorporated need not be derived from O(2); Acting on single donors with incorporation of molecular oxygen (oxygenases). The oxygen incorporated need not be derived from O(2); Oxidoreductases	-	-	-	-	-
EMD64665	198.732	233.482	0	0	108.054	216.107	0	0	#NAME?	0.0125719	1	quinate transport protein	1983	20	6.60518E-161	76.06	-	-	-	-	-	-	-	-	-	-
EMD64891	462.471	540.554	0	0	250.756	501.513	0	0	#NAME?	0.00415291	1	ZnF-C2HC domain containing protein	774	20	6.39415E-168	85.25	2	F:GO:0003676; F:GO:0008270	F:nucleic acid binding; F:zinc ion binding	-	-	-	-	-	-	-
EMD65260	369.234	445.039	0	20.8433	208.779	407.136	10.4216	0.0255974	-5.28786	0.0261812	1	uncharacterized protein COCSADRAFT_160226	189	6	5.51732E-36	91.96	-	-	-	-	-	-	-	-	-	-
EMD64972	803.473	818.47	33.2735	0	413.804	810.972	16.6368	0.0205146	-5.60721	0.0282467	1	hypothetical protein, partial	600	1	8.93835E-06	60	-	-	-	-	-	-	-	-	-	-
EMD65071	94.3515	109.277	0	0	50.9071	101.814	0	0	#NAME?	0.0446306	1	arrestin domain containing protein	2385	20	0	94.46	-	-	-	-	-	-	-	-	-	-
EMD64890	150.721	189.865	0	0	85.1464	170.293	0	0	#NAME?	0.0185414	1	RVT-1 domain containing protein	510	20	5.58627E-85	88.42	-	-	-	-	-	-	-	-	-	-
EMD64341	240.522	263.688	0	0	126.052	252.105	0	0	#NAME?	0.00990718	1	uncharacterized protein COCSADRAFT_89658	225	20	1.47E-46	90.64	1	C:GO:0016021	C:integral component of membrane	-	-	-	-	-	-	-
EMD64159	112.367	170.738	0	0	70.7764	141.553	0	0	#NAME?	0.0253483	1	dna binding protein sart-1	507	5	9.22933E-104	84.88	-	-	-	-	-	-	-	-	-	-
EMD64390	219.906	197.445	0	0	104.338	208.675	0	0	#NAME?	0.0132908	1	ferric reductase	2034	20	0	92.43	1	F:GO:0016491	F:oxidoreductase activity	EC:1.16; EC:1	Oxidizing metal ions; Oxidoreductases	-	-	-	-	-
EMD64249	109.21	115.108	0	0	56.0796	112.159	0	0	#NAME?	0.0377972	1	putative metabolite transport protein	1524	20	0	95.98	2	F:GO:0005215; P:GO:0055085	F:transporter activity; P:transmembrane transport	EC:7	n/a	-	-	-	-	-
EMD64202	396.536	373.665	16.6368	0	196.709	385.1	8.31838	0.0216005	-5.53279	0.0282411	1	putative transcription factor bhlh protein	867	20	4.58138E-164	77.68	1	F:GO:0046983	F:protein dimerization activity	-	-	-	-	-	-	-
EMD64037	98.6233	109.044	0	0	51.9168	103.834	0	0	#NAME?	0.0431524	1	Pre-mRNA-processing-splicing factor 8	7128	20	0	99.6	5	F:GO:0003723; C:GO:0005634; P:GO:0016071; F:GO:0016787; F:GO:0140096	F:RNA binding; C:nucleus; P:mRNA metabolic process; F:hydrolase activity; F:catalytic activity, acting on a protein	EC:3.4; EC:3	Acting on peptide bonds (peptidases); Hydrolases	-	-	-	K12856	Spliceosome;
EMD63525	398.579	402.354	0	0	200.233	400.467	0	0	#NAME?	0.0052953	1	benzoate 4-monooxygenase cytochrome-like protein P450	1491	20	0	86.32	1	F:GO:0016491	F:oxidoreductase activity	EC:1; EC:1.14	Oxidoreductases; Acting on paired donors, with incorporation or reduction of molecular oxygen. The oxygen incorporated need not be derived from O(2)	-	-	-	-	-
EMD63848	117.289	133.069	0	0	62.5894	125.179	0	0	#NAME?	0.0312921	1	uncharacterized protein COCSADRAFT_37598	1215	12	0	72.46	-	-	-	-	-	-	-	-	-	-
EMD63454	146.078	169.222	0	0	78.8249	157.65	0	0	#NAME?	0.0211068	1	uncharacterized protein COCSADRAFT_37239	1905	20	0	85.61	-	-	-	-	-	-	-	-	-	-
EMD63612	265.317	281.415	0	0	136.683	273.366	0	0	#NAME?	0.008787	1	Asp f 13-like protein	417	20	1.91869E-95	87.84	1	C:GO:0005576	C:extracellular region	-	-	-	-	-	-	-
EMD63625	413.066	411.101	0	0	206.042	412.084	0	0	#NAME?	0.00512122	1	DUF4336 domain containing protein	825	20	0	95.11	1	F:GO:0016740	F:transferase activity	EC:2	Transferases	-	-	-	-	-
EMD63611	246.837	300.191	16.6368	0	140.916	273.514	8.31838	0.030413	-5.03917	0.0448844	1	Cupredoxin	621	20	9.23079E-98	89.07	2	P:GO:0006091; F:GO:0016491	P:generation of precursor metabolites and energy; F:oxidoreductase activity	EC:1	Oxidoreductases	-	-	-	-	-
EMD63501	317.322	311.97	16.6368	0	161.482	314.646	8.31838	0.0264372	-5.24128	0.0368818	1	Peptidyl-prolyl cis-trans isomerase-like 4	501	20	2.82869E-91	92.97	1	F:GO:0016853	F:isomerase activity	EC:5	Isomerases	-	-	-	-	-
EMD63419	492.745	578.574	0	0	267.83	535.659	0	0	#NAME?	0.00390378	1	set domain	537	20	7.96133E-115	93.03	1	F:GO:0016740	F:transferase activity	EC:2.7; EC:2	Transferring phosphorus-containing groups; Transferases	-	-	-	-	-
EMD63574	102.245	112.426	0	0	53.6678	107.336	0	0	#NAME?	0.0407641	1	WSC-like protein	1185	20	0	83.4	1	C:GO:0016021	C:integral component of membrane	-	-	-	-	-	K11244	-
EMD63125	460.056	523.411	0	0	245.867	491.733	0	0	#NAME?	0.00423406	1	Calcofluor white hypersensitive	1401	20	0	89.94	-	-	-	-	-	-	-	-	-	-
EMD63022	1173.08	1534.66	33.2735	0	685.253	1353.87	16.6368	0.0122883	-6.34657	0.0183868	1	cdp-alcohol phosphatidyltransferase	642	20	5.20393E-136	87.6	1	F:GO:0016740	F:transferase activity	EC:2	Transferases	-	-	-	-	-
EMD63308	889.653	1065.01	49.9103	0	501.144	977.334	24.9551	0.0255339	-5.29144	0.0387672	1	zinc finger transcription factor	2292	20	0	89.79	-	-	-	-	-	-	-	-	-	-
EMD63040	153.043	177.036	0	0	82.5196	165.039	0	0	#NAME?	0.0195398	1	---NA---	582	-	-	-	-	-	-	-	-	-	-	-	-	-
EMD63212	666.497	722.838	0	20.8433	352.545	694.667	10.4216	0.0150024	-6.05867	0.0151991	1	uncharacterized protein COCSADRAFT_38083	2676	20	0	93.99	4	F:GO:0003723; C:GO:0005634; P:GO:0016071; F:GO:0016740	F:RNA binding; C:nucleus; P:mRNA metabolic process; F:transferase activity	EC:2.1; EC:2; EC:2.1.1	Transferring one-carbon groups; Transferases; Transferring one-carbon groups	-	-	-	-	-
EMD63007	175.702	168.406	0	0	86.0269	172.054	0	0	#NAME?	0.0182241	1	---NA---	264	-	-	-	-	-	-	-	-	-	-	-	-	-
EMD62676	215.448	257.74	0	0	118.297	236.594	0	0	#NAME?	0.0109133	1	HSP20-like chaperone	987	20	6.14453E-175	81.13	-	-	-	-	-	-	-	-	-	-
EMD62424	93.2371	99.1308	0	0	48.092	96.1839	0	0	#NAME?	0.0491899	1	hypothetical protein GGP41_002048	921	20	0	73.8	1	C:GO:0016021	C:integral component of membrane	-	-	-	-	-	-	-
EMD62583	89.8011	101.347	0	0	47.7869	95.5739	0	0	#NAME?	0.049728	1	l-2-hydroxyglutarate dehydrogenase	948	20	7.05357E-166	90.2	-	-	-	-	-	-	-	-	-	-
EMD62637	213.312	184.267	0	0	99.3947	198.789	0	0	#NAME?	0.0143703	1	uncharacterized protein COCSADRAFT_222761	303	20	4.15812E-65	77.71	1	C:GO:0016021	C:integral component of membrane	-	-	-	-	-	-	-
EMD62743	277.111	270.219	0	10.4216	139.438	273.665	5.21082	0.0190409	-5.71476	0.024094	1	victoriocin	552	20	8.98491E-100	64.4	-	-	-	-	-	-	-	-	-	-
EMD62712	93.1442	107.178	0	0	50.0805	100.161	0	0	#NAME?	0.0458995	1	uncharacterized protein COCSADRAFT_223653	1269	20	0	82.66	-	-	-	-	-	-	-	-	-	-
EMD62119	375.549	475.245	8.31838	0	214.778	425.397	4.15919	0.0097772	-6.67636	0.0135102	1	l-serine dehydratase	1512	20	0	95.74	1	C:GO:0016021	C:integral component of membrane	-	-	-	-	-	-	-
EMD62056	112.46	128.054	0	0	60.1285	120.257	0	0	#NAME?	0.0335268	1	ornithine decarboxylase	3078	20	0	74.57	3	F:GO:0003824; P:GO:0006596; P:GO:1901564	F:catalytic activity; P:polyamine biosynthetic process; P:organonitrogen compound metabolic process	-	-	-	-	-	-	-
EMD61924	129.64	134.002	0	0	65.9105	131.821	0	0	#NAME?	0.0286324	1	fungal zn binuclear cluster domain containing protein	2715	20	0	88.09	-	-	-	-	-	-	-	-	-	-
EMD61943	167.622	168.872	0	0	84.1237	168.247	0	0	#NAME?	0.0189184	1	clathrin heavy chain	5058	20	0	97.82	6	F:GO:0005198; C:GO:0005794; C:GO:0005886; P:GO:0006886; P:GO:0016192; C:GO:0031410	F:structural molecule activity; C:Golgi apparatus; C:plasma membrane; P:intracellular protein transport; P:vesicle-mediated transport; C:cytoplasmic vesicle	-	-	-	-	-	K04646	Endocytosis; Lysosome; Bacterial invasion of epithelial cells;
EMD61303	658.046	813.572	16.6368	0	372.064	735.809	8.31838	0.0113051	-6.46689	0.0145407	1	uncharacterized protein COCSADRAFT_39039	732	20	3.75379E-122	70.68	-	-	-	-	-	-	-	-	-	-
EMD61641	326.144	334.945	16.6368	0	169.432	330.545	8.31838	0.0251657	-5.3124	0.0344905	1	MFS general substrate transporter	1866	20	0	94.07	2	F:GO:0005215; P:GO:0055085	F:transporter activity; P:transmembrane transport	EC:7	n/a	-	-	-	-	-
EMD61525	133.076	126.887	0	0	64.991	129.982	0	0	#NAME?	0.0293304	1	uncharacterized protein COCSADRAFT_39244	7281	20	0	88.69	2	F:GO:0005215; P:GO:0055085	F:transporter activity; P:transmembrane transport	EC:7	n/a	-	-	-	-	-
EMD61266	707.45	757.942	0	10.4216	368.954	732.696	5.21082	0.00711185	-7.13556	0.00810443	1	NRDE protein-domain-containing protein	957	20	0	94.06	-	-	-	-	-	-	-	-	-	-
EMD60302	856.407	995.39	8.31838	0	465.029	925.898	4.15919	0.00449206	-7.79841	0.00684102	1	Hexose transporter HXT13	1713	20	0	95.18	2	F:GO:0005215; P:GO:0055085	F:transporter activity; P:transmembrane transport	EC:7	n/a	-	-	-	K08139	-
EMD60497	118.218	120.356	0	0	59.6436	119.287	0	0	#NAME?	0.0339958	1	putative proline-specific permease put4	1692	20	0	95.43	1	P:GO:0055085	P:transmembrane transport	-	-	-	-	-	-	-
EMD60644	94.9087	96.4484	0	0	47.8393	95.6785	0	0	#NAME?	0.0496334	1	multicopper oxidase	2208	20	0	90.83	1	F:GO:0016491	F:oxidoreductase activity	EC:1	Oxidoreductases	-	-	-	-	-
EMD60725	164.465	236.281	0	0	100.187	200.373	0	0	#NAME?	0.0141894	1	putative ricin b lectin protein	510	20	1.31244E-121	95.37	3	F:GO:0016787; F:GO:0016874; F:GO:0140096	F:hydrolase activity; F:ligase activity; F:catalytic activity, acting on a protein	EC:3.4; EC:3; EC:6	Acting on peptide bonds (peptidases); Hydrolases; Ligases	-	-	-	-	-
EMD60677	120.075	125.838	0	0	61.4783	122.957	0	0	#NAME?	0.0322699	1	vacuolar calcium ion transporter /H(+) exchanger	2286	20	0	90.56	2	F:GO:0005215; P:GO:0055085	F:transporter activity; P:transmembrane transport	EC:7	n/a	-	-	-	-	-
EMD60343	103.638	95.5154	0	0	49.7884	99.5767	0	0	#NAME?	0.0463579	1	transmembrane BAX inhibitor motif-containing protein 4	837	20	0	93.79	5	C:GO:0005739; C:GO:0005773; C:GO:0005783; P:GO:0012501; P:GO:0023052	C:mitochondrion; C:vacuole; C:endoplasmic reticulum; P:programmed cell death; P:signaling	-	-	-	-	-	-	-
EMD60084	198.082	187.299	8.31838	0	98.4249	192.691	4.15919	0.0215848	-5.53384	0.0412754	1	Mid2 domain containing protein	948	20	4.62733E-59	86.75	1	C:GO:0016021	C:integral component of membrane	-	-	-	-	-	-	-
EMD60043	322.615	472.679	0	20.8433	204.034	397.647	10.4216	0.0262083	-5.25383	0.0269528	1	gpi anchored serine-threonine rich protein	510	20	7.26295E-48	94.12	-	-	-	-	-	-	-	-	-	-
EMD59859	115.246	129.803	0	0	61.2623	122.525	0	0	#NAME?	0.0324666	1	2,3-diketo-5-methylthio-1-phosphopentane phosphatase	663	20	5.08746E-161	90.52	3	P:GO:0006520; P:GO:0006790; F:GO:0016787	P:cellular amino acid metabolic process; P:sulfur compound metabolic process; F:hydrolase activity	EC:3.1; EC:3; EC:3.1.3.77; EC:3.1.3	Acting on ester bonds; Hydrolases; Acireductone synthase; Acting on ester bonds	-	-	-	K09880	Metabolic pathways; Cysteine and methionine metabolism;
EMD60179	99.6448	102.63	0	0	50.5686	101.137	0	0	#NAME?	0.0451419	1	CopZ Copper chaperone	237	20	3.50715E-48	97.12	1	F:GO:0045182	F:translation regulator activity	-	-	-	-	-	K07213	-
EMD60216	114.875	142.282	0	0	64.2892	128.578	0	0	#NAME?	0.0298849	1	uncharacterized protein COCSADRAFT_40657	591	5	6.8402E-135	66.21	-	-	-	-	-	-	-	-	-	-
EMD60007	106.703	122.456	0	0	57.2896	114.579	0	0	#NAME?	0.0364358	1	glycosylphosphatidylinositol anchored cell wall protein	552	20	2.32232E-66	72.85	-	-	-	-	-	-	-	-	-	-
EMD59828	101.502	105.895	0	0	51.8493	103.699	0	0	#NAME?	0.0432479	1	udp-glucose 4-epimerase	1410	20	0	93.44	2	P:GO:0005975; F:GO:0016853	P:carbohydrate metabolic process; F:isomerase activity	EC:5.1.3.7; EC:5.1; EC:5; EC:5.1.3; EC:5.1.3.2	UDP-N-acetylglucosamine 4-epimerase; Racemases and epimerases; Isomerases; Racemases and epimerases; UDP-glucose 4-epimerase	-	-	-	K01784	Metabolic pathways; Biosynthesis of nucleotide sugars; Galactose metabolism; Amino sugar and nucleotide sugar metabolism; O-Antigen nucleotide sugar biosynthesis;
EMD59831	221.206	233.482	0	0	113.672	227.344	0	0	#NAME?	0.0116087	1	glycosyltransferase family 4 protein	9186	20	0	89.66	1	F:GO:0016740	F:transferase activity	EC:2	Transferases	-	-	-	-	-
EMD59830	1046.22	1248	16.6368	20.8433	582.926	1147.11	18.74	0.0163367	-5.93574	0.0209518	1	extracellular serine-rich protein	2070	20	0	91.68	3	P:GO:0005975; F:GO:0016787; F:GO:0016853	P:carbohydrate metabolic process; F:hydrolase activity; F:isomerase activity	EC:3.2; EC:3; EC:5; EC:3.2.1.22; EC:3.2.1	Glycosylases; Hydrolases; Isomerases; Alpha-galactosidase; Glycosylases	-	-	-	-	-
EMD59656	634.551	697.881	0	0	333.108	666.216	0	0	#NAME?	0.00329322	1	cytochrome P450 monooxygenase-like protein	1539	20	0	79.19	1	F:GO:0016491	F:oxidoreductase activity	EC:1; EC:1.14	Oxidoreductases; Acting on paired donors, with incorporation or reduction of molecular oxygen. The oxygen incorporated need not be derived from O(2)	-	-	-	-	-
EMD59238	544.378	512.331	0	0	264.177	528.355	0	0	#NAME?	0.00395275	1	g-protein beta wd-40 repeat-containing protein	1914	20	0	72.9	-	-	-	-	-	-	-	-	-	-
EMD59067	120.911	121.756	0	0	60.6667	121.333	0	0	#NAME?	0.0330155	1	uncharacterized protein COCSADRAFT_263112	1266	20	0	78.65	1	C:GO:0016021	C:integral component of membrane	-	-	-	-	-	-	-
EMD58903	220.927	232.199	0	0	113.282	226.563	0	0	#NAME?	0.0116711	1	lipase/serine esteras-like protein	1335	20	0	90.66	1	P:GO:0006629	P:lipid metabolic process	-	-	-	-	-	-	-
EMD58945	1567.76	1532.21	16.6368	20.8433	784.362	1549.98	18.74	0.0120905	-6.36999	0.0165904	1	siderophore iron transporter mirC	3156	20	0	87.35	2	F:GO:0005215; P:GO:0055085	F:transporter activity; P:transmembrane transport	EC:7	n/a	-	-	-	K08139	-
EMD58801	192.232	217.038	0	0	102.317	204.635	0	0	#NAME?	0.0137151	1	DNAJ domain containing protein	1788	20	0	78.92	-	-	-	-	-	-	-	-	-	-
EMD59012	150.535	138.433	0	0	72.2421	144.484	0	0	#NAME?	0.0244729	1	uncharacterized protein COCSADRAFT_204080	426	20	4.98088E-98	65.7	-	-	-	-	-	-	-	-	-	-
EMD58862	100.016	104.845	0	0	51.2154	102.431	0	0	#NAME?	0.0441697	1	indoleamine 2,3-dioxygenase alpha type	1473	20	0	95.81	3	P:GO:0006520; F:GO:0016491; P:GO:0055086	P:cellular amino acid metabolic process; F:oxidoreductase activity; P:nucleobase-containing small molecule metabolic process	EC:1.13.11; EC:1.13; EC:1.13.11.52; EC:1	Acting on single donors with incorporation of molecular oxygen (oxygenases). The oxygen incorporated need not be derived from O(2); Acting on single donors with incorporation of molecular oxygen (oxygenases). The oxygen incorporated need not be derived from O(2); Indoleamine 2,3-dioxygenase; Oxidoreductases	-	-	-	K00463	Metabolic pathways; Biosynthesis of cofactors; Tryptophan metabolism;
EMD58860	414.831	376.814	24.9551	0	204.15	395.822	12.4776	0.0315232	-4.98744	0.0424072	1	plasma membrane proteolipid 3	1245	20	0	81.23	1	C:GO:0016021	C:integral component of membrane	-	-	-	-	-	-	-
EMD59047	514.011	572.976	8.31838	20.8433	279.037	543.494	14.5808	0.026828	-5.22012	0.0292659	1	gtp-binding protein 1	3441	20	0	93.94	2	F:GO:0003924; P:GO:0006520	F:GTPase activity; P:cellular amino acid metabolic process	EC:3.6.1; EC:3.6; EC:3	Acting on acid anhydrides; Acting on acid anhydrides; Hydrolases	-	-	-	-	-
EMD58563	943.7	1150.85	0	0	523.638	1047.28	0	0	#NAME?	0.00248484	1	inositolphosphorylceramide-B C-26 hydroxylase	1179	20	0	94.78	6	F:GO:0003723; C:GO:0005634; C:GO:0005783; P:GO:0006629; P:GO:0016071; F:GO:0016491	F:RNA binding; C:nucleus; C:endoplasmic reticulum; P:lipid metabolic process; P:mRNA metabolic process; F:oxidoreductase activity	EC:1	Oxidoreductases	-	-	-	-	-
EMD58636	319.365	335.878	0	20.8433	169.022	327.622	10.4216	0.03181	-4.97438	0.0346076	1	uncharacterized protein COCSADRAFT_41750	762	20	1.02429E-112	72.33	-	-	-	-	-	-	-	-	-	-
EMD58720	280.547	306.372	0	0	146.73	293.46	0	0	#NAME?	0.0079366	1	Gag/polymerase/env polyprotein	294	20	6.85675E-66	86.15	3	F:GO:0003723; C:GO:0005634; P:GO:0006325	F:RNA binding; C:nucleus; P:chromatin organization	-	-	-	-	-	-	-
EMD58494	389.2	390.809	16.6368	0	199.161	390.004	8.31838	0.0213289	-5.55104	0.0277942	1	alpha beta-hydrolase	540	20	4.631E-68	81.69	2	P:GO:0006520; F:GO:0016787	P:cellular amino acid metabolic process; F:hydrolase activity	EC:3	Hydrolases	-	-	-	-	-
EMD58355	315.743	374.831	0	0	172.644	345.287	0	0	#NAME?	0.00636526	1	Zinc knuckle	165	15	3.67838E-30	89.83	-	-	-	-	-	-	-	-	-	-
EMD58228	100.388	95.8653	0	0	49.0633	98.1265	0	0	#NAME?	0.0475363	1	WD40-repeat-containing domain protein	4500	20	0	77.49	1	C:GO:0031410	C:cytoplasmic vesicle	-	-	-	-	-	-	-
EMD58078	496.924	506.034	0	20.8433	255.95	501.479	10.4216	0.0207818	-5.58853	0.0205953	1	Zinc knuckle	390	19	1.52965E-87	72.54	2	F:GO:0003676; F:GO:0008270	F:nucleic acid binding; F:zinc ion binding	-	-	-	-	-	-	-
EMD58070	239.872	290.861	0	10.4216	135.289	265.367	5.21082	0.0196363	-5.67033	0.0251952	1	retropepsin-like domain-containing protein	324	20	3.26868E-71	86.72	-	-	-	-	-	-	-	-	-	-

## Sheet: BS_SI DEGs with annotation
genes	BS.1	BS.2	SI.1	SI.2	normalised_count	normalised_count_BS	normalised_count_SI	foldChange	log2FoldChange	pval	padj	Description	Length	#Hits	e-Value	sim mean	#GO	GO IDs	GO Names	Enzyme Codes	Enzyme Names	InterPro IDs	InterPro GO IDs	InterPro GO Names	Cross-reference (KO)	KEGG-pathways
EMD69113	79.5279	73.5617	0	0	38.2724	76.5448	0	0	#NAME?	0.0478808	1	putative glycosyl transferase family 2 protein	711	20	6.76184E-75	92.8	1	F:GO:0016740	F:transferase activity	EC:2	Transferases	-	-	-	-	-
EMD69785	84.1617	78.5511	0	0	40.6782	81.3564	0	0	#NAME?	0.0430109	1	alcohol dehydrogenase	1050	20	0	97.71	1	F:GO:0016491	F:oxidoreductase activity	EC:1	Oxidoreductases	-	-	-	-	-
EMD69701	458.309	426.146	16.6989	15.4568	229.153	442.228	16.0779	0.0363566	-4.78164	0.0465181	1	glycoside hydrolase family 16 protein	1365	20	0	91.46	2	F:GO:0004553; P:GO:0005975	F:hydrolase activity, hydrolyzing O-glycosyl compounds; P:carbohydrate metabolic process	EC:3.2; EC:3; EC:3.2.1	Glycosylases; Hydrolases; Glycosylases	-	-	-	-	-
EMD68979	271.559	253.18	0	0	131.185	262.369	0	0	#NAME?	0.00698669	1	uncharacterized protein COCSADRAFT_176835	519	20	5.00701E-106	74.89	-	-	-	-	-	-	-	-	-	-
EMD69143	759.718	734.849	0	0	373.642	747.284	0	0	#NAME?	0.0042411	1	uncharacterized protein COCSADRAFT_31904	465	20	4.48082E-67	82.07	-	-	-	-	-	-	-	-	-	-
EMD69037	81.7909	75.4807	0	0	39.3179	78.6358	0	0	#NAME?	0.0456636	1	Cytochrome P450 monooxygenase aclL	1527	20	0	90.89	5	F:GO:0004497; F:GO:0005506; C:GO:0016021; F:GO:0016705; F:GO:0020037	F:monooxygenase activity; F:iron ion binding; C:integral component of membrane; F:oxidoreductase activity, acting on paired donors, with incorporation or reduction of molecular oxygen; F:heme binding	EC:1; EC:1.14	Oxidoreductases; Acting on paired donors, with incorporation or reduction of molecular oxygen. The oxygen incorporated need not be derived from O(2)	-	-	-	-	-
EMD69861	82.222	74.969	0	0	39.2977	78.5955	0	0	#NAME?	0.0457047	1	uncharacterized protein COCSADRAFT_32526	1029	20	0	74.8	2	F:GO:0003676; F:GO:0008270	F:nucleic acid binding; F:zinc ion binding	-	-	-	-	-	-	-
EMD70145	156.47	124.223	0	0	70.1732	140.346	0	0	#NAME?	0.0170031	1	TRP-domain-containing protein	2178	20	0	95.81	2	C:GO:0016021; F:GO:0016874	C:integral component of membrane; F:ligase activity	EC:6	Ligases	-	-	-	-	-
EMD69144	188.259	197.401	0	0	96.4151	192.83	0	0	#NAME?	0.0104562	1	uncharacterized protein COCSADRAFT_186131	381	20	2.87834E-87	72.34	2	C:GO:0016020; C:GO:0016021	C:membrane; C:integral component of membrane	-	-	-	-	-	-	-
EMD69278	87.0712	80.2142	0	0	41.8214	83.6427	0	0	#NAME?	0.0409638	1	glycoside hydrolase family 76 protein	1350	20	0	92.88	5	F:GO:0008168; F:GO:0008496; C:GO:0016021; P:GO:0016052; P:GO:0032259	F:methyltransferase activity; F:mannan endo-1,6-alpha-mannosidase activity; C:integral component of membrane; P:carbohydrate catabolic process; P:methylation	EC:2.1; EC:3.2; EC:3.2.1.101; EC:2; EC:3; EC:3.2.1.24; EC:2.1.1; EC:3.2.1	Transferring one-carbon groups; Glycosylases; Mannan endo-1,6-alpha-mannosidase; Transferases; Hydrolases; Alpha-mannosidase; Transferring one-carbon groups; Glycosylases	-	-	-	-	-
EMD69199	117.244	113.221	0	0	57.6164	115.233	0	0	#NAME?	0.0235216	1	Calcipressin-domain-containing protein	783	20	1.77936E-165	96.72	2	F:GO:0003676; P:GO:0019722	F:nucleic acid binding; P:calcium-mediated signaling	-	-	-	-	-	-	-
EMD69983	82.653	100.3	0	0	45.7382	91.4764	0	0	#NAME?	0.0350107	1	uncharacterized protein COCSADRAFT_342083	768	7	0	71.31	-	-	-	-	-	-	-	-	-	-
EMD69284	343.759	327.509	8.34947	0	169.904	335.634	4.17474	0.0124384	-6.32906	0.0148854	1	FAS1 domain-containing protein	1356	20	0	87.53	-	-	-	-	-	-	-	-	-	-
EMD70119	366.712	393.139	0	15.4568	193.827	379.926	7.72841	0.0203419	-5.6194	0.0245183	1	von Willebrand domain containing protein	2712	20	0	86.18	1	C:GO:0005643	C:nuclear pore	-	-	-	-	-	-	-
EMD69254	68.5363	83.5405	0	0	38.0192	76.0384	0	0	#NAME?	0.0484483	1	ADAM 8 precursor	2421	20	0	91.33	8	F:GO:0003987; F:GO:0004222; F:GO:0005524; P:GO:0006508; P:GO:0007229; C:GO:0016021; F:GO:0016208; P:GO:0019427	F:acetate-CoA ligase activity; F:metalloendopeptidase activity; F:ATP binding; P:proteolysis; P:integrin-mediated signaling pathway; C:integral component of membrane; F:AMP binding; P:acetyl-CoA biosynthetic process from acetate	EC:3.4.24; EC:3.4; EC:6.2; EC:3; EC:6; EC:6.2.1.1; EC:6.2.1	Acting on peptide bonds (peptidases); Acting on peptide bonds (peptidases); Forming carbon-sulfur bonds; Hydrolases; Ligases; Acetate--CoA ligase; Forming carbon-sulfur bonds	-	-	-	-	-
EMD69902	233.842	205.589	0	0	109.858	219.716	0	0	#NAME?	0.00872726	1	glycoside hydrolase family 17 protein	1443	20	0	92.19	1	F:GO:0016787	F:hydrolase activity	EC:3	Hydrolases	-	-	-	K01199	Metabolic pathways; Starch and sucrose metabolism;
EMD69264	306.15	339.151	0	0	161.325	322.651	0	0	#NAME?	0.00560264	1	NAC-domain-containing protein	690	20	1.58378E-128	81.5	2	C:GO:0005634; C:GO:0005737	C:nucleus; C:cytoplasm	-	-	-	-	-	-	-
EMD69723	131.9	141.878	0	0	68.4445	136.889	0	0	#NAME?	0.0177043	1	gpi anchored serine-threonine rich protein	747	20	3.38596E-114	79.04	1	C:GO:0110165	C:cellular anatomical entity	-	-	-	-	-	-	-
EMD68114	107.007	111.302	0	0	54.5773	109.155	0	0	#NAME?	0.0257843	1	polyubiquitin	918	20	0	100	3	F:GO:0003729; C:GO:0005634; C:GO:0005737	F:mRNA binding; C:nucleus; C:cytoplasm	-	-	-	-	-	K08770	Ubiquitin mediated proteolysis;
EMD68918	3066.89	2957.56	16.6989	7.72841	1512.22	3012.23	12.2137	0.0040547	-7.94619	0.027977	1	pyruvate decarboxylase	1722	20	0	97.21	3	F:GO:0000287; F:GO:0004737; F:GO:0030976	F:magnesium ion binding; F:pyruvate decarboxylase activity; F:thiamine pyrophosphate binding	EC:4.1.1; EC:4.1.1.1; EC:4.1; EC:4	Carbon-carbon lyases; Pyruvate decarboxylase; Carbon-carbon lyases; Lyases	-	-	-	K01568	Metabolic pathways; Biosynthesis of secondary metabolites; Glycolysis_Gluconeogenesis;
EMD68711	104.529	108.999	0	0	53.3819	106.764	0	0	#NAME?	0.0267789	1	acetylcholinesterase precursor	1650	20	0	88.96	1	F:GO:0016787	F:hydrolase activity	EC:3	Hydrolases	-	-	-	-	-
EMD68545	79.5279	75.0969	0	0	38.6562	77.3124	0	0	#NAME?	0.0470482	1	uncharacterized protein COCSADRAFT_109171	1464	20	0	80.4	-	-	-	-	-	-	-	-	-	-
EMD68321	650.125	693.783	0	0	335.977	671.954	0	0	#NAME?	0.00413218	1	tyrosinase family protein	861	20	0	80.89	1	F:GO:0016491	F:oxidoreductase activity	EC:1	Oxidoreductases	-	-	-	K00505	Metabolic pathways; Biosynthesis of secondary metabolites; Tyrosine metabolism; Isoquinoline alkaloid biosynthesis; Betalain biosynthesis;
EMD68142	130.607	124.607	0	0	63.8035	127.607	0	0	#NAME?	0.0198544	1	CTP-transf-1 domain containing protein	1431	20	0	93.39	5	F:GO:0004143; C:GO:0016021; P:GO:0016310; F:GO:0016779; F:GO:0016874	F:diacylglycerol kinase activity; C:integral component of membrane; P:phosphorylation; F:nucleotidyltransferase activity; F:ligase activity	EC:2.7.1; EC:2.7; EC:2; EC:2.7.7; EC:6; EC:2.7.1.107	Transferring phosphorus-containing groups; Transferring phosphorus-containing groups; Transferases; Transferring phosphorus-containing groups; Ligases; Diacylglycerol kinase (ATP)	-	-	-	K16368	Metabolic pathways; Biosynthesis of secondary metabolites; Glycerophospholipid metabolism;
EMD68702	104.852	108.999	0	0	53.4628	106.926	0	0	#NAME?	0.0267096	1	carbohydrate-binding module family 43 protein	1608	20	0	90.92	5	C:GO:0005886; C:GO:0031225; F:GO:0042123; P:GO:0071840; P:GO:0071852	C:plasma membrane; C:anchored component of membrane; F:glucanosyltransferase activity; P:cellular component organization or biogenesis; P:fungal-type cell wall organization or biogenesis	EC:2	Transferases	-	-	-	-	-
EMD68791	268.865	262.135	0	0	132.75	265.5	0	0	#NAME?	0.00689084	1	protein translation factor sui1	354	20	6.76599E-65	97.91	3	F:GO:0003743; C:GO:0005840; P:GO:0006413	F:translation initiation factor activity; C:ribosome; P:translational initiation	-	-	-	-	-	-	-
EMD68450	79.3124	83.2846	0	0	40.6493	81.2985	0	0	#NAME?	0.0430668	1	globin-like protein	912	20	0	85.75	2	F:GO:0019825; F:GO:0020037	F:oxygen binding; F:heme binding	-	-	-	-	-	-	-
EMD68064	80.6055	73.9455	0	0	38.6378	77.2755	0	0	#NAME?	0.0470872	1	cell lysis protein-like protein	1143	20	0	89.04	2	C:GO:0005789; C:GO:0016021	C:endoplasmic reticulum membrane; C:integral component of membrane	-	-	-	-	-	-	-
EMD67977	75.5407	85.7154	0	0	40.314	80.6281	0	0	#NAME?	0.0437003	1	uncharacterized protein COCSADRAFT_32936	1911	20	0	82.06	-	-	-	-	-	-	-	-	-	-
EMD68134	103.559	123.456	0	0	56.7536	113.507	0	0	#NAME?	0.0241296	1	carbohydrate esterase family 5 protein	1113	20	7.35487E-157	95.92	2	F:GO:0050525; F:GO:0080030	F:cutinase activity; F:methyl indole-3-acetate esterase activity	EC:3.1; EC:3; EC:3.1.1.74; EC:3.1.1.1	Acting on ester bonds; Hydrolases; Cutinase; Carboxylesterase	-	-	-	-	-
EMD68685	85.4548	85.3316	0	0	42.6966	85.3932	0	0	#NAME?	0.0395001	1	60S ribosomal protein L29	246	20	3.76009E-38	98.59	3	P:GO:0002181; F:GO:0003735; C:GO:0022625	P:cytoplasmic translation; F:structural constituent of ribosome; C:cytosolic large ribosomal subunit	-	-	-	-	-	K02905	Ribosome;
EMD68022	231.687	268.276	16.6989	0	129.166	249.982	8.34947	0.0334003	-4.90399	0.0388203	1	tata-box-binding protein	750	20	0	98.36	23	C:GO:0000120; C:GO:0000126; F:GO:0000979; F:GO:0001006; F:GO:0001092; F:GO:0001179; P:GO:0001188; F:GO:0003682; F:GO:0004674; C:GO:0005669; C:GO:0005672; P:GO:0006359; P:GO:0006468; F:GO:0008301; F:GO:0016251; P:GO:0042790; P:GO:0045892; P:GO:0045944; P:GO:0051123; F:GO:0061629; P:GO:0070893; P:GO:0070898; F:GO:0097718	C:RNA polymerase I transcription regulator complex; C:transcription factor TFIIIB complex; F:RNA polymerase II core promoter sequence-specific DNA binding; F:RNA polymerase III type 3 promoter sequence-specific DNA binding; F:TFIIA-class transcription factor complex binding; F:RNA polymerase I general transcription initiation factor binding; P:RNA polymerase I preinitiation complex assembly; F:ch…	EC:2.7.1; EC:2.7; EC:2	Transferring phosphorus-containing groups; Transferring phosphorus-containing groups; Transferases	-	-	-	K03120	Basal transcription factors;
EMD68764	79.8512	76.1204	0	0	38.9929	77.9858	0	0	#NAME?	0.046336	1	putative bicyclomycin resistance protein	1512	20	0	87.36	6	F:GO:0003677; P:GO:0006351; F:GO:0008270; C:GO:0016021; F:GO:0022857; P:GO:0055085	F:DNA binding; P:DNA-templated transcription; F:zinc ion binding; C:integral component of membrane; F:transmembrane transporter activity; P:transmembrane transport	EC:7	n/a	-	-	-	-	-
EMD68102	121.878	123.456	0	0	61.3335	122.667	0	0	#NAME?	0.0211916	1	uncharacterized protein COCSADRAFT_33064	1881	20	0	87.02	-	-	-	-	-	-	-	-	-	-
EMD68097	192.246	180.002	0	0	93.0622	186.124	0	0	#NAME?	0.0110049	1	globin-like protein	1299	20	0	87.81	9	F:GO:0005344; F:GO:0008941; P:GO:0015671; C:GO:0016021; F:GO:0019825; F:GO:0020037; F:GO:0046872; P:GO:0051409; F:GO:0071949	F:oxygen carrier activity; F:nitric oxide dioxygenase activity; P:oxygen transport; C:integral component of membrane; F:oxygen binding; F:heme binding; F:metal ion binding; P:response to nitrosative stress; F:FAD binding	EC:1.14.12; EC:1.14.12.17; EC:1; EC:1.14	Acting on paired donors, with incorporation or reduction of molecular oxygen. The oxygen incorporated need not be derived from O(2); Nitric oxide dioxygenase; Oxidoreductases; Acting on paired donors, with incorporation or reduction of molecular oxygen. The oxygen incorporated need not be derived from O(2)	-	-	-	-	-
EMD68063	129.421	152.241	0	0	70.4155	140.831	0	0	#NAME?	0.0169114	1	ubiquitin carrier	1149	20	0	85.63	1	C:GO:0016021	C:integral component of membrane	-	-	-	-	-	-	-
EMD68406	148.926	99.6601	0	0	62.1466	124.293	0	0	#NAME?	0.0207319	1	uncharacterized protein COCSADRAFT_272519	270	4	2.20336E-58	95.56	-	-	-	-	-	-	-	-	-	-
EMD68765	558.851	555.487	0	0	278.584	557.169	0	0	#NAME?	0.00409312	1	integral membrane protein	1764	20	0	92.43	3	C:GO:0016021; F:GO:0022857; P:GO:0055085	C:integral component of membrane; F:transmembrane transporter activity; P:transmembrane transport	EC:7	n/a	-	-	-	-	-
EMD67971	80.7133	69.5958	0	0	37.5773	75.1545	0	0	#NAME?	0.0494478	1	homeobox and c2h2 domain-containing transcription factor protein	2850	20	0	88.03	3	F:GO:0003677; C:GO:0005634; P:GO:0006355	F:DNA binding; C:nucleus; P:regulation of DNA-templated transcription	-	-	-	-	-	-	-
EMD68605	495.271	520.689	0	0	253.99	507.98	0	0	#NAME?	0.00416713	1	c6 transcription factor	912	20	0	93.34	4	F:GO:0000981; C:GO:0005634; P:GO:0006357; F:GO:0008270	F:DNA-binding transcription factor activity, RNA polymerase II-specific; C:nucleus; P:regulation of transcription by RNA polymerase II; F:zinc ion binding	-	-	-	-	-	-	-
EMD68543	256.149	262.775	0	0	129.731	259.462	0	0	#NAME?	0.00707912	1	uncharacterized protein COCSADRAFT_80326	1209	20	0	90.34	1	C:GO:0016021	C:integral component of membrane	-	-	-	-	-	-	-
EMD67641	146.448	157.87	0	0	76.0794	152.159	0	0	#NAME?	0.01495	1	ubiquitin conjugating enzyme	711	20	1.95786E-154	98.05	13	P:GO:0000082; P:GO:0000086; P:GO:0000209; F:GO:0005524; C:GO:0005634; C:GO:0005737; P:GO:0010828; F:GO:0016874; C:GO:0019005; P:GO:0030466; P:GO:0031146; P:GO:0051865; F:GO:0061630	P:G1/S transition of mitotic cell cycle; P:G2/M transition of mitotic cell cycle; P:protein polyubiquitination; F:ATP binding; C:nucleus; C:cytoplasm; P:positive regulation of glucose transmembrane transport; F:ligase activity; C:SCF ubiquitin ligase complex; P:silent mating-type cassette heterochromatin formation; P:SCF-dependent proteasomal ubiquitin-dependent protein catabolic process; P:prote…	EC:2; EC:6	Transferases; Ligases	-	-	-	K02207	Ubiquitin mediated proteolysis;
EMD67444	92.567	82.3891	0	0	43.739	87.4781	0	0	#NAME?	0.0378596	1	cyanovirin-N family protein	318	20	3.06724E-69	91.07	-	-	-	-	-	-	-	-	-	-
EMD67408	107.438	116.291	0	0	55.9324	111.865	0	0	#NAME?	0.0247315	1	calcium-activated chloride channel-domain-containing protein	2226	20	0	92.32	1	C:GO:0016021	C:integral component of membrane	-	-	-	-	-	-	-
EMD67686	145.909	153.648	0	0	74.8892	149.778	0	0	#NAME?	0.0153268	1	HET-domain-containing protein	1002	20	0	63.27	1	C:GO:0016021	C:integral component of membrane	-	-	-	-	-	-	-
EMD67576	114.874	112.581	0	0	56.8638	113.728	0	0	#NAME?	0.024049	1	c-5 sterol desaturase	1059	20	0	92.98	5	F:GO:0005506; P:GO:0008610; C:GO:0016021; F:GO:0016491; P:GO:0044255	F:iron ion binding; P:lipid biosynthetic process; C:integral component of membrane; F:oxidoreductase activity; P:cellular lipid metabolic process	EC:1	Oxidoreductases	-	-	-	K00227	Metabolic pathways; Biosynthesis of secondary metabolites;
EMD67872	0	0	50.0968	15.4568	16.3884	0	32.7768	Inf	Inf	0.0130838	1	PKSKA1	7164	20	0	80.71	7	F:GO:0003723; F:GO:0004315; P:GO:0006633; F:GO:0008270; C:GO:0016021; F:GO:0016491; F:GO:0031177	F:RNA binding; F:3-oxoacyl-[acyl-carrier-protein] synthase activity; P:fatty acid biosynthetic process; F:zinc ion binding; C:integral component of membrane; F:oxidoreductase activity; F:phosphopantetheine binding	EC:2.3.1.85; EC:2.3.1.41; EC:2.3; EC:1; EC:2; EC:2.3.1	Fatty-acid synthase; Beta-ketoacyl-[acyl-carrier-protein] synthase I; Acyltransferases; Oxidoreductases; Transferases; Acyltransferases	-	-	-	-	-
EMD67201	77.9115	76.888	0	0	38.6999	77.3997	0	0	#NAME?	0.0469557	1	H(+)-transporting V1 sector ATPase subunit A	1830	20	0	98.82	14	C:GO:0000221; C:GO:0000329; F:GO:0003924; F:GO:0005524; F:GO:0005525; P:GO:0007035; P:GO:0015986; C:GO:0016021; F:GO:0046933; F:GO:0046961; P:GO:0090463; P:GO:0090464; P:GO:0090465; P:GO:1902600	C:vacuolar proton-transporting V-type ATPase, V1 domain; C:fungal-type vacuole membrane; F:GTPase activity; F:ATP binding; F:GTP binding; P:vacuolar acidification; P:proton motive force-driven ATP synthesis; C:integral component of membrane; F:proton-transporting ATP synthase activity, rotational mechanism; F:proton-transporting ATPase activity, rotational mechanism; P:lysine homeostasis; P:histi…	EC:7.1.3.1; EC:7.1.2.2; EC:3.6.1; EC:3.6; EC:3; EC:6; EC:7; EC:3.6.1.15	n/a; n/a; Acting on acid anhydrides; Acting on acid anhydrides; Hydrolases; Ligases; n/a; Nucleoside-triphosphate phosphatase	-	-	-	K02145	Metabolic pathways; Oxidative phosphorylation;
EMD67319	464.883	473.609	0	30.9137	242.351	469.246	15.4568	0.0329397	-4.92403	0.0444348	1	ABC transporter CDR4	4464	20	0	95.02	5	F:GO:0005524; C:GO:0016021; F:GO:0016874; P:GO:0055085; F:GO:0140359	F:ATP binding; C:integral component of membrane; F:ligase activity; P:transmembrane transport; F:ABC-type transporter activity	EC:6; EC:7	Ligases; n/a	-	-	-	K08711	ABC transporters;
EMD67719	103.128	105.545	0	0	52.1682	104.336	0	0	#NAME?	0.0278572	1	MATH and UCH domain containing protein	4209	20	0	87.27	4	F:GO:0003824; C:GO:0005737; P:GO:0008612; P:GO:0016579	F:catalytic activity; C:cytoplasm; P:peptidyl-lysine modification to peptidyl-hypusine; P:protein deubiquitination	-	-	-	-	-	-	-
EMD67175	362.294	278.767	0	15.4568	164.129	320.53	7.72841	0.0241113	-5.37414	0.0290676	1	uncharacterized protein COCSADRAFT_168399	672	20	2.08754E-147	97.24	-	-	-	-	-	-	-	-	-	-
EMD67769	89.1187	84.436	0	0	43.3887	86.7774	0	0	#NAME?	0.038399	1	multidrug resistance-associated protein 1	4632	20	0	97.33	7	C:GO:0000329; F:GO:0005524; F:GO:0015439; C:GO:0016021; F:GO:0016787; F:GO:0020037; P:GO:0140357	C:fungal-type vacuole membrane; F:ATP binding; F:ABC-type heme transporter activity; C:integral component of membrane; F:hydrolase activity; F:heme binding; P:heme export from vacuole to cytoplasm	EC:7.6.2.5; EC:3; EC:7	n/a; Hydrolases; n/a	-	-	-	K05665	ABC transporters;
EMD66956	240.308	248.958	0	0	122.317	244.633	0	0	#NAME?	0.00760171	1	Endoplasmic oxidoreductin-1	1851	20	0	93.73	5	C:GO:0005789; F:GO:0015035; F:GO:0016972; P:GO:0034975; F:GO:0071949	C:endoplasmic reticulum membrane; F:protein-disulfide reductase activity; F:thiol oxidase activity; P:protein folding in endoplasmic reticulum; F:FAD binding	EC:1; EC:1.8; EC:1.8.3; EC:1.8.3.2	Oxidoreductases; Acting on a sulfur group of donors; Acting on a sulfur group of donors; Thiol oxidase	-	-	-	K10976	-
EMD66954	565.855	469.388	0	0	258.811	517.621	0	0	#NAME?	0.00414637	1	predicted protein	573	20	1.57715E-70	84.89	-	-	-	-	-	-	-	-	-	-
EMD67510	1432.36	1340.74	33.3979	0	701.626	1386.55	16.6989	0.0120435	-6.3756	0.0336969	1	glycosyltransferase family 4 protein	2025	20	0	89.07	1	F:GO:0016757	F:glycosyltransferase activity	EC:2.4; EC:2	Glycosyltransferases; Transferases	-	-	-	-	-
EMD66112	103.451	108.104	0	0	52.8887	105.777	0	0	#NAME?	0.0272086	1	bZIP transcription factor family protein	1815	20	0	90.48	2	F:GO:0003700; P:GO:0006355	F:DNA-binding transcription factor activity; P:regulation of DNA-templated transcription	-	-	-	-	-	-	-
EMD66556	92.7826	96.078	0	0	47.2151	94.4303	0	0	#NAME?	0.0331171	1	flotillin domain-containing protein	1515	20	0	97.1	3	C:GO:0016020; F:GO:0016301; P:GO:0016310	C:membrane; F:kinase activity; P:phosphorylation	EC:2.7; EC:2	Transferring phosphorus-containing groups; Transferases	-	-	-	K07192	-
EMD66219	118.322	113.221	0	0	57.8858	115.772	0	0	#NAME?	0.0233376	1	fre ferric reductase-like transmembrane component	1836	20	0	94.54	3	P:GO:0000041; F:GO:0000293; C:GO:0016021	P:transition metal ion transport; F:ferric-chelate reductase activity; C:integral component of membrane	EC:1.16; EC:1	Oxidizing metal ions; Oxidoreductases	-	-	-	-	-
EMD66672	357.229	325.463	0	0	170.673	341.346	0	0	#NAME?	0.00531752	1	putative MFS-type transporter	1683	20	0	94.12	8	F:GO:0000981; F:GO:0003677; C:GO:0005634; P:GO:0006357; F:GO:0008270; C:GO:0016021; F:GO:0022857; P:GO:0055085	F:DNA-binding transcription factor activity, RNA polymerase II-specific; F:DNA binding; C:nucleus; P:regulation of transcription by RNA polymerase II; F:zinc ion binding; C:integral component of membrane; F:transmembrane transporter activity; P:transmembrane transport	EC:7	n/a	-	-	-	-	-
EMD66829	213.044	202.519	0	0	103.891	207.781	0	0	#NAME?	0.00941364	1	c4-dicarboxylate transporter malic acid transport protein	579	20	7.02085E-126	86.38	-	-	-	-	-	-	-	-	-	-
EMD66110	235.243	224.523	0	0	114.942	229.883	0	0	#NAME?	0.00822415	1	uncharacterized protein COCSADRAFT_137372	705	20	6.12259E-172	66.44	1	C:GO:0016021	C:integral component of membrane	-	-	-	-	-	-	-
EMD66098	722.325	684.188	0	15.4568	355.492	703.256	7.72841	0.0109895	-6.50773	0.0179848	1	HSP20-like chaperone	1122	20	1.45874E-100	92.6	-	-	-	-	-	-	-	-	K13993	-
EMD66152	92.3515	76.6321	0	0	42.2459	84.4918	0	0	#NAME?	0.0402411	1	uncharacterized protein COCSADRAFT_169117	822	20	1.34061E-144	87.05	-	-	-	-	-	-	-	-	-	-
EMD66725	91.8127	95.95	0	0	46.9407	93.8814	0	0	#NAME?	0.0334559	1	atp-dependent rna helicase dbp9	732	20	5.4524E-179	85.29	4	F:GO:0003676; F:GO:0003724; F:GO:0005524; F:GO:0016787	F:nucleic acid binding; F:RNA helicase activity; F:ATP binding; F:hydrolase activity	EC:3.6.4.13; EC:3	RNA helicase; Hydrolases	-	-	-	-	-
EMD66258	335.569	323.927	0	0	164.874	329.748	0	0	#NAME?	0.00548824	1	alternative oxidase	1074	20	0	94.3	5	C:GO:0005743; F:GO:0009916; C:GO:0016021; F:GO:0046872; C:GO:0070469	C:mitochondrial inner membrane; F:alternative oxidase activity; C:integral component of membrane; F:metal ion binding; C:respirasome	EC:1.10; EC:1; EC:1.10.3	Acting on diphenols and related substances as donors; Oxidoreductases; Acting on diphenols and related substances as donors	-	-	-	-	-
EMD66111	101.403	143.03	0	0	61.1082	122.216	0	0	#NAME?	0.0213238	1	uncharacterized protein COCSADRAFT_34696	192	20	1.20236E-36	92.7	-	-	-	-	-	-	-	-	-	-
EMD66509	332.121	354.759	16.6989	7.72841	177.827	343.44	12.2137	0.0355628	-4.81349	0.0420201	1	glycoside hydrolase family 128 protein	1419	20	2.83391E-180	90.7	1	F:GO:0016787	F:hydrolase activity	EC:3	Hydrolases	-	-	-	-	-
EMD66015	0	0	0	30.9137	7.72841	0	15.4568	Inf	Inf	0.0447996	1	MdlB ABC-type multidrug transport system ATPase and permease component	3987	20	0	92.73	4	F:GO:0005524; C:GO:0016021; P:GO:0055085; F:GO:0140359	F:ATP binding; C:integral component of membrane; P:transmembrane transport; F:ABC-type transporter activity	EC:7	n/a	-	-	-	K05658	ABC transporters;
EMD65867	95.7999	112.453	0	0	52.0633	104.127	0	0	#NAME?	0.0279553	1	C2H2 finger domain protein	2178	20	0	91.28	1	F:GO:0003677	F:DNA binding	-	-	-	-	-	-	-
EMD65792	99.4638	92.8796	0	0	48.0859	96.1717	0	0	#NAME?	0.0320775	1	DUF1748-domain-containing protein	231	20	3.87409E-48	94.33	-	-	-	-	-	-	-	-	-	-
EMD65717	116.598	123.712	0	0	60.0774	120.155	0	0	#NAME?	0.0219322	1	benomyl/methotrexate resistance protein	1593	20	0	95.33	3	C:GO:0016021; F:GO:0022857; P:GO:0055085	C:integral component of membrane; F:transmembrane transporter activity; P:transmembrane transport	EC:7	n/a	-	-	-	-	-
EMD65353	210.997	207.764	16.6989	0	108.865	209.38	8.34947	0.0398771	-4.6483	0.0489715	1	putative opsin-like protein	921	20	0	90.34	5	F:GO:0005216; P:GO:0007602; F:GO:0009881; C:GO:0016021; P:GO:0034220	F:ion channel activity; P:phototransduction; F:photoreceptor activity; C:integral component of membrane; P:ion transmembrane transport	EC:7	n/a	-	-	-	-	-
EMD65746	102.373	96.4618	0	0	49.7088	99.4175	0	0	#NAME?	0.0302797	1	14-3-3 protein	240	20	2.40954E-50	92.04	1	C:GO:0016021	C:integral component of membrane	-	-	-	-	-	-	-
EMD65374	116.598	121.793	0	0	59.5976	119.195	0	0	#NAME?	0.0222269	1	ribokinase-like protein	981	20	0	90.56	5	C:GO:0016021; F:GO:0016301; P:GO:0016310; F:GO:0016773; P:GO:0071704	C:integral component of membrane; F:kinase activity; P:phosphorylation; F:phosphotransferase activity, alcohol group as acceptor; P:organic substance metabolic process	EC:2.7.1; EC:2.7; EC:2	Transferring phosphorus-containing groups; Transferring phosphorus-containing groups; Transferases	-	-	-	-	-
EMD65754	1042.7	937.112	0	23.1852	500.749	989.906	11.5926	0.0117108	-6.41601	0.026214	1	Zinc knuckle	366	17	2.20094E-65	79.46	2	F:GO:0003676; F:GO:0008270	F:nucleic acid binding; F:zinc ion binding	-	-	-	-	-	-	-
EMD65901	278.132	294.758	0	7.72841	145.155	286.445	3.86421	0.0134902	-6.21194	0.0176532	1	uncharacterized protein COCSADRAFT_198753	4818	20	0	90	-	-	-	-	-	-	-	-	-	-
EMD65613	619.736	650.797	25.0484	15.4568	327.76	635.266	20.2526	0.0318805	-4.97118	0.0484294	1	opsin-1 protein	915	20	0	92.62	5	F:GO:0005216; P:GO:0007602; F:GO:0009881; C:GO:0016021; P:GO:0034220	F:ion channel activity; P:phototransduction; F:photoreceptor activity; C:integral component of membrane; P:ion transmembrane transport	EC:7	n/a	-	-	-	-	-
EMD65849	0	0	0	30.9137	7.72841	0	15.4568	Inf	Inf	0.0447996	1	cytochrome P450	1161	20	0	84.32	4	F:GO:0004497; F:GO:0005506; F:GO:0016705; F:GO:0020037	F:monooxygenase activity; F:iron ion binding; F:oxidoreductase activity, acting on paired donors, with incorporation or reduction of molecular oxygen; F:heme binding	EC:1; EC:1.14	Oxidoreductases; Acting on paired donors, with incorporation or reduction of molecular oxygen. The oxygen incorporated need not be derived from O(2)	-	-	-	-	-
EMD65848	0	0	83.4947	77.2841	40.1947	0	80.3894	Inf	Inf	0.00173547	1	D-xylulose 5-phosphate/D-fructose 6-phosphate phosphoketolase	2427	20	0	88.33	2	P:GO:0005975; F:GO:0016832	P:carbohydrate metabolic process; F:aldehyde-lyase activity	EC:4.1.2; EC:4.1; EC:4	Carbon-carbon lyases; Carbon-carbon lyases; Lyases	-	-	-	K01621	Metabolic pathways; Microbial metabolism in diverse environments; Pentose phosphate pathway; Carbon fixation in photosynthetic organisms;
EMD65780	109.917	105.289	0	0	53.8014	107.603	0	0	#NAME?	0.0264217	1	transglutaminase protein	1326	20	0	96.59	1	C:GO:0016021	C:integral component of membrane	-	-	-	-	-	K01456	-
EMD64665	230.609	256.123	0	0	121.683	243.366	0	0	#NAME?	0.00765099	1	quinate transport protein	1983	20	6.60695E-161	76.06	-	-	-	-	-	-	-	-	-	-
EMD64891	536.652	592.971	0	0	282.406	564.811	0	0	#NAME?	0.00408787	1	ZnF-C2HC domain containing protein	774	20	6.39586E-168	85.25	2	F:GO:0003676; F:GO:0008270	F:nucleic acid binding; F:zinc ion binding	-	-	-	-	-	-	-
EMD65257	237.291	228.233	0	0	116.381	232.762	0	0	#NAME?	0.00809338	1	RVT-1 domain containing protein	246	20	1.81199E-52	92.47	4	F:GO:0003723; C:GO:0005634; P:GO:0006325; P:GO:0015074	F:RNA binding; C:nucleus; P:chromatin organization; P:DNA integration	-	-	-	-	-	-	-
EMD65076	76.9416	78.0394	0	0	38.7453	77.4905	0	0	#NAME?	0.0468594	1	lysosomal cystine transporter	846	20	0	76.16	-	-	-	-	-	-	-	-	-	-
EMD64903	0	0	16.6989	30.9137	11.9032	0	23.8063	Inf	Inf	0.0237026	1	dihydrodipicolinate synthase	972	20	0	99.58	1	F:GO:0016829	F:lyase activity	EC:4	Lyases	-	-	-	K01714	Metabolic pathways; Biosynthesis of secondary metabolites; Microbial metabolism in diverse environments; Biosynthesis of amino acids; Lysine biosynthesis; Monobactam biosynthesis;
EMD65260	428.459	488.194	0	0	229.163	458.327	0	0	#NAME?	0.00433251	1	uncharacterized protein COCSADRAFT_160226	189	6	5.51879E-36	91.96	-	-	-	-	-	-	-	-	-	-
EMD64972	932.352	897.836	33.3979	0	465.896	915.094	16.6989	0.0182483	-5.77609	0.0347533	1	hypothetical protein, partial	600	1	8.94074E-06	60	-	-	-	-	-	-	-	-	-	-
EMD65087	422.532	384.056	0	15.4568	205.511	403.294	7.72841	0.0191632	-5.70552	0.0232571	1	Inositol-3-phosphate synthase	1611	20	0	97.81	3	F:GO:0004512; P:GO:0006021; P:GO:0008654	F:inositol-3-phosphate synthase activity; P:inositol biosynthetic process; P:phospholipid biosynthetic process	EC:5; EC:5.5.1.4; EC:5.5.1	Isomerases; Inositol-3-phosphate synthase; Intramolecular lyases	-	-	-	K01858	Metabolic pathways; Biosynthesis of secondary metabolites; Inositol phosphate metabolism; Streptomycin biosynthesis;
EMD65071	109.486	119.874	0	0	57.3398	114.68	0	0	#NAME?	0.0237141	1	arrestin domain containing protein	2385	20	0	94.46	-	-	-	-	-	-	-	-	-	-
EMD64635	263.369	279.023	0	0	135.598	271.196	0	0	#NAME?	0.00672492	1	antigenic thaumatin-like protein	855	20	4.85662E-164	77.42	-	-	-	-	-	-	-	-	-	-
EMD64890	174.897	208.276	0	0	95.7931	191.586	0	0	#NAME?	0.0105543	1	RVT-1 domain containing protein	510	20	5.58732E-85	88.42	-	-	-	-	-	-	-	-	-	-
EMD64605	130.607	145.46	0	0	69.0168	138.034	0	0	#NAME?	0.0174675	1	Lon protease	3297	20	0	96.03	10	F:GO:0004176; F:GO:0004252; F:GO:0005524; C:GO:0005759; P:GO:0006515; F:GO:0016887; P:GO:0034599; F:GO:0043565; P:GO:0051131; P:GO:0070407	F:ATP-dependent peptidase activity; F:serine-type endopeptidase activity; F:ATP binding; C:mitochondrial matrix; P:protein quality control for misfolded or incompletely synthesized proteins; F:ATP hydrolysis activity; P:cellular response to oxidative stress; F:sequence-specific DNA binding; P:chaperone-mediated protein complex assembly; P:oxidation-dependent protein catabolic process	EC:3.4.21; EC:3.6.1; EC:3.4; EC:3.6; EC:3; EC:3.6.1.15	Acting on peptide bonds (peptidases); Acting on acid anhydrides; Acting on peptide bonds (peptidases); Acting on acid anhydrides; Hydrolases; Nucleoside-triphosphate phosphatase	-	-	-	-	-
EMD64341	279.102	289.257	0	0	142.09	284.18	0	0	#NAME?	0.00638295	1	uncharacterized protein COCSADRAFT_89658	225	20	1.47039E-46	90.64	1	C:GO:0016021	C:integral component of membrane	-	-	-	-	-	-	-
EMD64479	89.1187	105.545	0	0	48.6659	97.3319	0	0	#NAME?	0.031418	1	uncharacterized protein COCSADRAFT_37061	1089	20	0	82.73	-	-	-	-	-	-	-	-	-	-
EMD64451	83.8384	79.4466	0	0	40.8212	81.6425	0	0	#NAME?	0.0427463	1	ARM repeat-containing protein	3327	20	0	94.75	8	C:GO:0005737; P:GO:0006607; F:GO:0008139; C:GO:0016021; F:GO:0031267; C:GO:0034399; F:GO:0061608; P:GO:2000220	C:cytoplasm; P:NLS-bearing protein import into nucleus; F:nuclear localization sequence binding; C:integral component of membrane; F:small GTPase binding; C:nuclear periphery; F:nuclear import signal receptor activity; P:regulation of pseudohyphal growth	-	-	-	-	-	K20221	Nucleocytoplasmic transport;
EMD64391	82.653	68.9561	0	0	37.9023	75.8045	0	0	#NAME?	0.0487042	1	high affinity copper transporter	576	20	1.3072E-119	92.74	4	F:GO:0005375; P:GO:0006878; C:GO:0016021; P:GO:0035434	F:copper ion transmembrane transporter activity; P:cellular copper ion homeostasis; C:integral component of membrane; P:copper ion transmembrane transport	EC:7	n/a	-	-	-	K14686	-
EMD64390	255.179	216.591	0	15.4568	121.807	235.885	7.72841	0.0327635	-4.93177	0.0419443	1	ferric reductase	2034	20	0	92.43	3	P:GO:0000041; F:GO:0000293; C:GO:0016021	P:transition metal ion transport; F:ferric-chelate reductase activity; C:integral component of membrane	EC:1.16; EC:1	Oxidizing metal ions; Oxidoreductases	-	-	-	-	-
EMD64249	126.727	126.27	0	0	63.2494	126.499	0	0	#NAME?	0.0201418	1	putative metabolite transport protein	1524	20	0	95.98	3	C:GO:0016021; F:GO:0022857; P:GO:0055085	C:integral component of membrane; F:transmembrane transporter activity; P:transmembrane transport	EC:7	n/a	-	-	-	-	-
EMD64229	74.5709	88.9137	0	0	40.8711	81.7423	0	0	#NAME?	0.0426583	1	hypothetical protein GGP41_006665	657	20	2.66103E-157	91.41	-	-	-	-	-	-	-	-	-	-
EMD64202	460.141	409.899	0	0	217.51	435.02	0	0	#NAME?	0.0044504	1	putative transcription factor bhlh protein	867	20	4.58138E-164	77.68	1	F:GO:0046983	F:protein dimerization activity	-	-	-	-	-	-	-
EMD64252	115.52	110.279	0	0	56.4497	112.899	0	0	#NAME?	0.0243477	1	putative ubiquitin fusion degradation protein	5589	20	0	93.1	3	P:GO:0006511; P:GO:0016567; F:GO:0061630	P:ubiquitin-dependent protein catabolic process; P:protein ubiquitination; F:ubiquitin protein ligase activity	EC:2	Transferases	-	-	-	K10590	Ubiquitin mediated proteolysis;
EMD64036	87.3945	76.2483	0	0	40.9107	81.8214	0	0	#NAME?	0.0425806	1	ribosomal protein L34e	345	20	4.28354E-63	98.13	4	F:GO:0003735; P:GO:0006412; C:GO:0022625; P:GO:0042254	F:structural constituent of ribosome; P:translation; C:cytosolic large ribosomal subunit; P:ribosome biogenesis	-	-	-	-	-	K02915	Ribosome;
EMD64267	82.222	81.7494	0	0	40.9928	81.9857	0	0	#NAME?	0.0424327	1	putative di- and tripeptidase	2769	20	0	94.94	4	C:GO:0005576; P:GO:0006508; P:GO:0006751; F:GO:0008233	C:extracellular region; P:proteolysis; P:glutathione catabolic process; F:peptidase activity	EC:3.4; EC:3	Acting on peptide bonds (peptidases); Hydrolases	-	-	-	-	-
EMD64460	91.1661	105.417	0	0	49.1458	98.2916	0	0	#NAME?	0.0308865	1	cytochrome p450	1623	20	0	90.92	5	F:GO:0004497; F:GO:0005506; C:GO:0016021; F:GO:0016705; F:GO:0020037	F:monooxygenase activity; F:iron ion binding; C:integral component of membrane; F:oxidoreductase activity, acting on paired donors, with incorporation or reduction of molecular oxygen; F:heme binding	EC:1; EC:1.14	Oxidoreductases; Acting on paired donors, with incorporation or reduction of molecular oxygen. The oxygen incorporated need not be derived from O(2)	-	-	-	-	-
EMD63458	97.9551	95.3104	0	0	48.3164	96.6327	0	0	#NAME?	0.031812	1	ATP binding protein	4260	20	0	91.75	3	F:GO:0004672; F:GO:0005524; P:GO:0006468	F:protein kinase activity; F:ATP binding; P:protein phosphorylation	EC:2.7.1; EC:2.7; EC:2	Transferring phosphorus-containing groups; Transferring phosphorus-containing groups; Transferases	-	-	-	-	-
EMD63525	462.512	441.37	16.6989	0	230.145	451.941	8.34947	0.0184747	-5.75831	0.021261	1	benzoate 4-monooxygenase cytochrome-like protein P450	1491	20	0	86.32	5	F:GO:0004497; F:GO:0005506; C:GO:0016021; F:GO:0016705; F:GO:0020037	F:monooxygenase activity; F:iron ion binding; C:integral component of membrane; F:oxidoreductase activity, acting on paired donors, with incorporation or reduction of molecular oxygen; F:heme binding	EC:1; EC:1.14	Oxidoreductases; Acting on paired donors, with incorporation or reduction of molecular oxygen. The oxygen incorporated need not be derived from O(2)	-	-	-	-	-
EMD63848	136.103	145.972	0	0	70.5187	141.037	0	0	#NAME?	0.016871	1	uncharacterized protein COCSADRAFT_37598	1215	12	0	72.46	-	-	-	-	-	-	-	-	-	-
EMD63454	169.509	185.631	0	7.72841	90.7171	177.57	3.86421	0.0217616	-5.52207	0.0331977	1	uncharacterized protein COCSADRAFT_37239	1905	20	0	85.61	-	-	-	-	-	-	-	-	-	-
EMD63612	307.874	308.703	0	0	154.144	308.289	0	0	#NAME?	0.00585918	1	Asp f 13-like protein	417	20	1.91921E-95	87.84	1	C:GO:0005576	C:extracellular region	-	-	-	-	-	-	-
EMD63786	88.5799	93.5193	0	0	45.5248	91.0496	0	0	#NAME?	0.0352966	1	AMID mitochondrial oxidoreductase	1257	20	0	89.99	1	F:GO:0016491	F:oxidoreductase activity	EC:1	Oxidoreductases	-	-	-	K22745	p53 signaling pathway;
EMD63625	479.323	450.965	0	0	232.572	465.144	0	0	#NAME?	0.00430307	1	DUF4336 domain containing protein	825	20	0	95.11	1	F:GO:0016740	F:transferase activity	EC:2	Transferases	-	-	-	-	-
EMD63611	286.43	329.301	0	0	153.933	307.865	0	0	#NAME?	0.00586755	1	Cupredoxin	621	20	9.23327E-98	89.07	3	F:GO:0005507; F:GO:0009055; P:GO:0022900	F:copper ion binding; F:electron transfer activity; P:electron transport chain	EC:1	Oxidoreductases	-	-	-	-	-
EMD63501	368.221	342.222	0	0	177.611	355.221	0	0	#NAME?	0.00513654	1	Peptidyl-prolyl cis-trans isomerase-like 4	501	20	2.82944E-91	92.97	1	F:GO:0016853	F:isomerase activity	EC:5	Isomerases	-	-	-	-	-
EMD63419	571.782	634.677	0	0	301.615	603.23	0	0	#NAME?	0.00408103	1	set domain	537	20	7.96281E-115	93.03	2	F:GO:0016301; P:GO:0016310	F:kinase activity; P:phosphorylation	EC:2.7; EC:2	Transferring phosphorus-containing groups; Transferases	-	-	-	-	-
EMD63411	100.003	91.8562	0	0	47.9647	95.9294	0	0	#NAME?	0.0322186	1	pt repeat family	2292	20	0	72.96	1	C:GO:0016020	C:membrane	-	-	-	-	-	-	-
EMD62774	0	0	0	30.9137	7.72841	0	15.4568	Inf	Inf	0.0447996	1	FAD-binding domain-containing protein	597	14	7.00506E-146	58.19	2	F:GO:0016491; F:GO:0050660	F:oxidoreductase activity; F:flavin adenine dinucleotide binding	-	-	-	-	-	-	-
EMD62961	115.305	100.044	0	0	53.8372	107.674	0	0	#NAME?	0.0263908	1	putative 4-hydroxy-2-oxoglutarate aldolase	1086	20	0	96.32	1	F:GO:0008840	F:4-hydroxy-tetrahydrodipicolinate synthase activity	EC:4.2.1; EC:4.2; EC:4; EC:4.3.3.7	Carbon-oxygen lyases; Carbon-oxygen lyases; Lyases; 4-hydroxy-tetrahydrodipicolinate synthase	-	-	-	K18123	Metabolic pathways; Glyoxylate and dicarboxylate metabolism; Arginine and proline metabolism;
EMD63100	87.9333	103.498	0	0	47.8579	95.7157	0	0	#NAME?	0.032347	1	uncharacterized protein COCSADRAFT_37970	1893	20	0	74.77	-	-	-	-	-	-	-	-	-	-
EMD63125	533.85	574.165	0	0	277.004	554.007	0	0	#NAME?	0.00409582	1	Calcofluor white hypersensitive	1401	20	0	89.94	-	-	-	-	-	-	-	-	-	-
EMD63022	1361.24	1683.48	25.0484	23.1852	773.238	1522.36	24.1168	0.0158418	-5.98012	0.0481086	1	cdp-alcohol phosphatidyltransferase	642	20	5.20532E-136	87.6	2	C:GO:0016021; F:GO:0016740	C:integral component of membrane; F:transferase activity	EC:2	Transferases	-	-	-	-	-
EMD63071	266.817	245.76	0	0	128.144	256.289	0	0	#NAME?	0.00718315	1	aspartyl-trna synthetase	3132	20	0	95.84	6	F:GO:0004815; F:GO:0005524; C:GO:0005737; C:GO:0005886; P:GO:0006422; C:GO:0016021	F:aspartate-tRNA ligase activity; F:ATP binding; C:cytoplasm; C:plasma membrane; P:aspartyl-tRNA aminoacylation; C:integral component of membrane	EC:6.1; EC:6.1.1.12; EC:6.1.1; EC:6	Forming carbon-oxygen bonds; Aspartate--tRNA ligase; Forming carbon-oxygen bonds; Ligases	-	-	-	K24278	Aminoacyl-tRNA biosynthesis;
EMD63308	1032.35	1168.29	0	15.4568	554.025	1100.32	7.72841	0.00702378	-7.15354	0.0186243	1	zinc finger transcription factor	2292	20	0	89.79	-	-	-	-	-	-	-	-	-	-
EMD63039	75.5407	78.5511	0	0	38.523	77.0459	0	0	#NAME?	0.0473366	1	MFS general substrate transporter	2016	20	0	96.52	3	C:GO:0016021; F:GO:0022857; P:GO:0055085	C:integral component of membrane; F:transmembrane transporter activity; P:transmembrane transport	EC:7	n/a	-	-	-	-	-
EMD62759	0.538807	0.3838	100.194	216.396	79.378	0.461304	158.295	343.146	8.42268	0.0163106	1	CENPB domain containing protein	168	20	2.12169E-30	83.97	2	F:GO:0003677; C:GO:0005634	F:DNA binding; C:nucleus	-	-	-	-	-	-	-
EMD63212	773.404	792.931	0	0	391.584	783.167	0	0	#NAME?	0.00430289	1	uncharacterized protein COCSADRAFT_38083	2676	20	0	93.99	5	F:GO:0003723; C:GO:0005681; P:GO:0006397; F:GO:0008168; P:GO:0008380	F:RNA binding; C:spliceosomal complex; P:mRNA processing; F:methyltransferase activity; P:RNA splicing	EC:2.1; EC:2; EC:2.1.1	Transferring one-carbon groups; Transferases; Transferring one-carbon groups	-	-	-	-	-
EMD62676	250.006	282.733	0	0	133.185	266.37	0	0	#NAME?	0.0068651	1	HSP20-like chaperone	987	20	6.14502E-175	81.13	-	-	-	-	-	-	-	-	-	-
EMD62424	108.192	108.743	0	0	54.234	108.468	0	0	#NAME?	0.0260631	1	hypothetical protein GGP41_002048	921	20	0	73.8	1	C:GO:0016021	C:integral component of membrane	-	-	-	-	-	-	-
EMD62583	104.205	111.174	0	0	53.8448	107.69	0	0	#NAME?	0.0263864	1	l-2-hydroxyglutarate dehydrogenase	948	20	7.05489E-166	90.2	-	-	-	-	-	-	-	-	-	-
EMD62743	321.56	296.422	0	0	154.495	308.991	0	0	#NAME?	0.00584563	1	victoriocin	552	20	8.98659E-100	64.4	-	-	-	-	-	-	-	-	-	-
EMD62506	73.3855	76.76	0	0	37.5364	75.0728	0	0	#NAME?	0.0495461	1	uncharacterized protein COCSADRAFT_38427	462	5	1.84472E-12	97.2	-	-	-	-	-	-	-	-	-	-
EMD62508	80.1745	75.9924	0	0	39.0417	78.0835	0	0	#NAME?	0.046234	1	putative sterol desaturase	942	20	0	93	5	F:GO:0005506; P:GO:0008610; C:GO:0016021; F:GO:0016491; P:GO:0044255	F:iron ion binding; P:lipid biosynthetic process; C:integral component of membrane; F:oxidoreductase activity; P:cellular lipid metabolic process	EC:1	Oxidoreductases	-	-	-	K00227	Metabolic pathways; Biosynthesis of secondary metabolites;
EMD62712	108.085	117.571	0	0	56.4139	112.828	0	0	#NAME?	0.024375	1	uncharacterized protein COCSADRAFT_223653	1269	20	0	82.66	-	-	-	-	-	-	-	-	-	-
EMD62410	91.1661	89.5534	0	0	45.1799	90.3598	0	0	#NAME?	0.0357689	1	cysteine proteinase	2715	20	0	89.4	3	F:GO:0003677; F:GO:0004198; P:GO:0006508	F:DNA binding; F:calcium-dependent cysteine-type endopeptidase activity; P:proteolysis	EC:3.4.22; EC:3.4; EC:3	Acting on peptide bonds (peptidases); Acting on peptide bonds (peptidases); Hydrolases	-	-	-	-	-
EMD62160	254.101	230.664	0	0	121.191	242.383	0	0	#NAME?	0.00768915	1	Efflux pump	1731	20	0	93.95	3	C:GO:0016021; F:GO:0022857; P:GO:0055085	C:integral component of membrane; F:transmembrane transporter activity; P:transmembrane transport	EC:7	n/a	-	-	-	-	-
EMD62201	257.981	211.73	0	0	117.428	234.855	0	0	#NAME?	0.00800085	1	uncharacterized protein COCSADRAFT_38984	726	20	2.05677E-170	89.46	-	-	-	-	-	-	-	-	-	-
EMD62060	253.132	270.451	8.34947	0	132.983	261.791	4.17474	0.0159468	-5.97059	0.0196023	1	brassinin detoxification factor 1	2394	20	0	86.69	5	F:GO:0000981; F:GO:0003677; C:GO:0005634; P:GO:0006357; F:GO:0008270	F:DNA-binding transcription factor activity, RNA polymerase II-specific; F:DNA binding; C:nucleus; P:regulation of transcription by RNA polymerase II; F:zinc ion binding	-	-	-	-	-	-	-
EMD62056	130.499	140.471	0	0	67.7425	135.485	0	0	#NAME?	0.018003	1	ornithine decarboxylase	3078	20	0	74.57	3	F:GO:0003824; P:GO:0006596; P:GO:1901564	F:catalytic activity; P:polyamine biosynthetic process; P:organonitrogen compound metabolic process	-	-	-	-	-	-	-
EMD61871	240.308	242.945	16.6989	0	124.988	241.627	8.34947	0.0345553	-4.85495	0.0405302	1	30 kDa heat shock protein	588	20	1.13184E-141	96.35	-	-	-	-	-	-	-	-	K13993	-
EMD62181	99.8948	85.2036	0	0	46.2746	92.5492	0	0	#NAME?	0.0342992	1	serine/threonine-protein kinase/endoribonuclease IRE1 precursor	3618	20	0	92.19	10	F:GO:0004521; F:GO:0004674; F:GO:0004712; F:GO:0005524; P:GO:0006397; P:GO:0006468; C:GO:0016021; P:GO:0030968; P:GO:0090502; F:GO:0106310	F:endoribonuclease activity; F:protein serine/threonine kinase activity; F:protein serine/threonine/tyrosine kinase activity; F:ATP binding; P:mRNA processing; P:protein phosphorylation; C:integral component of membrane; P:endoplasmic reticulum unfolded protein response; P:RNA phosphodiester bond hydrolysis, endonucleolytic; F:protein serine kinase activity	EC:2.7.1; EC:2.7.12.1; EC:3.1; EC:2.7; EC:2; EC:3	Transferring phosphorus-containing groups; Dual-specificity kinase; Acting on ester bonds; Transferring phosphorus-containing groups; Transferases; Hydrolases	-	-	-	K08852	Apoptosis; Amyotrophic lateral sclerosis; Lipid and atherosclerosis;
EMD61846	77.4805	86.483	0	0	40.9909	81.9817	0	0	#NAME?	0.0424383	1	7alpha-cephem-methoxylase P8 chain	888	20	0	95.15	1	F:GO:0016491	F:oxidoreductase activity	EC:1	Oxidoreductases	-	-	-	-	-
EMD61924	150.435	146.995	0	0	74.3576	148.715	0	0	#NAME?	0.0155004	1	fungal zn binuclear cluster domain containing protein	2715	20	0	88.09	-	-	-	-	-	-	-	-	-	-
EMD61837	70.7992	79.4466	0	0	37.5615	75.1229	0	0	#NAME?	0.0494894	1	hypothetical protein COCSADRAFT_224821	210	5	9.7275E-43	88.48	-	-	-	-	-	-	-	-	-	-
EMD61303	763.597	892.463	0	0	414.015	828.03	0	0	#NAME?	0.00439608	1	uncharacterized protein COCSADRAFT_39039	732	20	3.75479E-122	70.68	-	-	-	-	-	-	-	-	-	-
EMD61733	71.0148	82.7729	0	0	38.4469	76.8938	0	0	#NAME?	0.0475035	1	PRP38-assoc multi-domain protein	1806	20	4.44008E-113	90.36	-	-	-	-	-	-	-	-	-	-
EMD61207	89.3342	93.0076	0	0	45.5854	91.1709	0	0	#NAME?	0.0352142	1	Delta(24)-sterol C-methyltransferase	1140	20	0	97.08	3	F:GO:0003838; P:GO:0016126; P:GO:0032259	F:sterol 24-C-methyltransferase activity; P:sterol biosynthetic process; P:methylation	EC:2.1; EC:2; EC:2.1.1.41; EC:2.1.1	Transferring one-carbon groups; Transferases; Sterol 24-C-methyltransferase; Transferring one-carbon groups	-	-	-	K00559	Metabolic pathways; Biosynthesis of secondary metabolites;
EMD61266	820.926	831.439	0	0	413.091	826.183	0	0	#NAME?	0.00439172	1	NRDE protein-domain-containing protein	957	20	0	94.06	-	-	-	-	-	-	-	-	-	-
EMD61242	107.223	114.117	0	0	55.3348	110.67	0	0	#NAME?	0.0251865	1	putative RNA interference and gene silencing protein	3117	20	0	86.49	1	F:GO:0003676	F:nucleic acid binding	-	-	-	-	-	K11593	Axon regeneration;
EMD61056	459.71	428.833	0	15.4568	226	444.271	7.72841	0.0173957	-5.84513	0.021544	1	C-4 methylsterol oxidase	879	20	0	96.74	6	F:GO:0000254; F:GO:0005506; C:GO:0005789; C:GO:0005886; P:GO:0006696; C:GO:0016021	F:C-4 methylsterol oxidase activity; F:iron ion binding; C:endoplasmic reticulum membrane; C:plasma membrane; P:ergosterol biosynthetic process; C:integral component of membrane	EC:1; EC:1.14; EC:1.14.18; EC:1.14.18.9	Oxidoreductases; Acting on paired donors, with incorporation or reduction of molecular oxygen. The oxygen incorporated need not be derived from O(2); Acting on paired donors, with incorporation or reduction of molecular oxygen. The oxygen incorporated need not be derived from O(2); Methylsterol monooxygenase	-	-	-	K07750	Metabolic pathways; Biosynthesis of secondary metabolites;
EMD60317	99.356	112.07	0	0	52.8564	105.713	0	0	#NAME?	0.0272379	1	Histone H4,2	1113	20	0	83.56	1	C:GO:0016021	C:integral component of membrane	-	-	-	-	-	-	-
EMD60302	993.776	1091.91	16.6989	0	525.596	1042.84	8.34947	0.00800645	-6.96462	0.0184706	1	Hexose transporter HXT13	1713	20	0	95.18	4	P:GO:0008643; C:GO:0016021; F:GO:0022857; P:GO:0055085	P:carbohydrate transport; C:integral component of membrane; F:transmembrane transporter activity; P:transmembrane transport	EC:7	n/a	-	-	-	K08139	-
EMD60644	110.132	105.801	0	0	53.9833	107.967	0	0	#NAME?	0.0262698	1	multicopper oxidase	2208	20	0	90.83	2	F:GO:0005507; F:GO:0016491	F:copper ion binding; F:oxidoreductase activity	EC:1	Oxidoreductases	-	-	-	-	-
EMD60580	83.8384	77.0159	0	0	40.2136	80.4271	0	0	#NAME?	0.043889	1	glycosyltransferase family 8 protein	1656	20	0	79.85	3	F:GO:0016757; F:GO:0016787; P:GO:0071704	F:glycosyltransferase activity; F:hydrolase activity; P:organic substance metabolic process	EC:2.4; EC:2; EC:3	Glycosyltransferases; Transferases; Hydrolases	-	-	-	K00750	Metabolic pathways; Biosynthesis of secondary metabolites; Starch and sucrose metabolism;
EMD60725	190.845	259.193	0	0	112.51	225.019	0	0	#NAME?	0.00845748	1	putative ricin b lectin protein	510	20	1.31269E-121	95.37	4	P:GO:0006508; F:GO:0008237; F:GO:0016874; F:GO:0030246	P:proteolysis; F:metallopeptidase activity; F:ligase activity; F:carbohydrate binding	EC:3.4; EC:3; EC:6	Acting on peptide bonds (peptidases); Hydrolases; Ligases	-	-	-	-	-
EMD60680	247.636	262.519	0	0	127.539	255.077	0	0	#NAME?	0.00722428	1	Pmp3 multi-domain protein	1209	20	0	92.88	2	P:GO:0001172; F:GO:0003968	P:RNA-templated transcription; F:RNA-directed 5'-3' RNA polymerase activity	EC:2.7; EC:2; EC:2.7.7.48; EC:2.7.7	Transferring phosphorus-containing groups; Transferases; RNA-directed RNA polymerase; Transferring phosphorus-containing groups	-	-	-	-	-
EMD60343	120.262	104.777	0	0	56.2598	112.52	0	0	#NAME?	0.0244861	1	transmembrane BAX inhibitor motif-containing protein 4	837	20	0	93.79	7	C:GO:0000324; C:GO:0005739; C:GO:0005783; P:GO:0006915; C:GO:0016021; P:GO:0019722; P:GO:0030968	C:fungal-type vacuole; C:mitochondrion; C:endoplasmic reticulum; P:apoptotic process; C:integral component of membrane; P:calcium-mediated signaling; P:endoplasmic reticulum unfolded protein response	-	-	-	-	-	-	-
EMD60084	229.855	205.461	0	0	108.829	217.658	0	0	#NAME?	0.00883772	1	Mid2 domain containing protein	948	20	4.62819E-59	86.75	1	C:GO:0016021	C:integral component of membrane	-	-	-	-	-	-	-
EMD60043	374.363	518.514	0	30.9137	230.948	446.439	15.4568	0.0346225	-4.85215	0.0462146	1	gpi anchored serine-threonine rich protein	510	20	7.26489E-48	94.12	-	-	-	-	-	-	-	-	-	-
EMD59859	133.732	142.39	0	0	69.0304	138.061	0	0	#NAME?	0.0174616	1	2,3-diketo-5-methylthio-1-phosphopentane phosphatase	663	20	5.08882E-161	90.52	4	F:GO:0000287; P:GO:0016311; P:GO:0019509; F:GO:0043874	F:magnesium ion binding; P:dephosphorylation; P:L-methionine salvage from methylthioadenosine; F:acireductone synthase activity	EC:3.1; EC:3; EC:3.1.3.77; EC:3.1.3	Acting on ester bonds; Hydrolases; Acireductone synthase; Acting on ester bonds	-	-	-	K09880	Metabolic pathways; Cysteine and methionine metabolism;
EMD59947	88.2566	95.1824	0	0	45.8598	91.7195	0	0	#NAME?	0.0348468	1	Acetyl-CoA synthetase-like protein	759	20	2.75751E-147	75.02	-	-	-	-	-	-	-	-	-	-
EMD60179	115.628	112.581	0	0	57.0523	114.105	0	0	#NAME?	0.0239149	1	CopZ Copper chaperone	237	20	3.50809E-48	97.12	3	F:GO:0003743; P:GO:0006413; F:GO:0046872	F:translation initiation factor activity; P:translational initiation; F:metal ion binding	-	-	-	-	-	K07213	-
EMD60216	133.301	156.079	0	0	72.3449	144.69	0	0	#NAME?	0.0161938	1	uncharacterized protein COCSADRAFT_40657	591	5	6.84075E-135	66.21	-	-	-	-	-	-	-	-	-	-
EMD60007	123.818	134.33	0	0	64.537	129.074	0	0	#NAME?	0.019486	1	glycosylphosphatidylinositol anchored cell wall protein	552	20	2.32295E-66	72.85	-	-	-	-	-	-	-	-	-	-
EMD59828	117.783	116.164	0	0	58.4867	116.973	0	0	#NAME?	0.0229368	1	udp-glucose 4-epimerase	1410	20	0	93.44	3	F:GO:0003974; F:GO:0003978; P:GO:0006012	F:UDP-N-acetylglucosamine 4-epimerase activity; F:UDP-glucose 4-epimerase activity; P:galactose metabolic process	EC:5.1.3.7; EC:5.1; EC:5; EC:5.1.3; EC:5.1.3.2	UDP-N-acetylglucosamine 4-epimerase; Racemases and epimerases; Isomerases; Racemases and epimerases; UDP-glucose 4-epimerase	-	-	-	K01784	Metabolic pathways; Biosynthesis of nucleotide sugars; Galactose metabolism; Amino sugar and nucleotide sugar metabolism; O-Antigen nucleotide sugar biosynthesis;
EMD59831	256.688	256.123	16.6989	0	132.377	256.405	8.34947	0.0325636	-4.9406	0.0376066	1	glycosyltransferase family 4 protein	9186	20	0	89.66	2	C:GO:0016021; F:GO:0016740	C:integral component of membrane; F:transferase activity	EC:2	Transferases	-	-	-	-	-
EMD59805	281.257	279.151	0	0	140.102	280.204	0	0	#NAME?	0.00648254	1	ATPase inhibitor	315	20	5.60208E-67	94.57	3	C:GO:0005739; P:GO:0032780; F:GO:0042030	C:mitochondrion; P:negative regulation of ATP-dependent activity; F:ATPase inhibitor activity	-	-	-	-	-	-	-
EMD59560	78.8813	78.2952	0	0	39.2941	78.5883	0	0	#NAME?	0.0457135	1	glycoside hydrolase family 10 protein	1506	20	0	87.03	4	C:GO:0005576; F:GO:0030248; F:GO:0031176; P:GO:0045493	C:extracellular region; F:cellulose binding; F:endo-1,4-beta-xylanase activity; P:xylan catabolic process	EC:3.2; EC:3.2.1.8; EC:3; EC:3.2.1	Glycosylases; Endo-1,4-beta-xylanase; Hydrolases; Glycosylases	-	-	-	-	-
EMD59658	78.127	77.6556	0	0	38.9456	77.8913	0	0	#NAME?	0.0464357	1	putative histidine kinase HHK13p	4566	20	0	85.35	3	F:GO:0000155; P:GO:0000160; P:GO:0018106	F:phosphorelay sensor kinase activity; P:phosphorelay signal transduction system; P:peptidyl-histidine phosphorylation	EC:2.7.1; EC:2.7; EC:2.7.3; EC:2; EC:2.7.13.3	Transferring phosphorus-containing groups; Transferring phosphorus-containing groups; Transferring phosphorus-containing groups; Transferases; Histidine kinase	-	-	-	-	-
EMD59748	685.686	752.504	0	0	359.547	719.095	0	0	#NAME?	0.00419766	1	uncharacterized membrane protein YFL067W-like	1899	19	1.29068E-26	83.85	2	C:GO:0016020; C:GO:0016021	C:membrane; C:integral component of membrane	-	-	-	-	-	-	-
EMD59728	77.1572	72.4103	0	0	37.3919	74.7837	0	0	#NAME?	0.0498811	1	DUF500-domain-containing protein	1893	20	0	91.4	-	-	-	-	-	-	-	-	-	-
EMD59656	736.334	765.553	0	0	375.472	750.943	0	0	#NAME?	0.00424706	1	cytochrome P450 monooxygenase-like protein	1539	20	0	79.19	5	F:GO:0004497; F:GO:0005506; C:GO:0016021; F:GO:0016705; F:GO:0020037	F:monooxygenase activity; F:iron ion binding; C:integral component of membrane; F:oxidoreductase activity, acting on paired donors, with incorporation or reduction of molecular oxygen; F:heme binding	EC:1; EC:1.14	Oxidoreductases; Acting on paired donors, with incorporation or reduction of molecular oxygen. The oxygen incorporated need not be derived from O(2)	-	-	-	-	-
EMD59360	432.878	389.045	0	0	205.481	410.961	0	0	#NAME?	0.00460569	1	serine-rich protein	2166	20	0	84.65	1	C:GO:0016021	C:integral component of membrane	-	-	-	-	-	-	-
EMD59250	106.792	93.9031	0	0	50.1737	100.347	0	0	#NAME?	0.0297945	1	WD repeat protein	1137	20	0	92.64	-	-	-	-	-	-	-	-	-	-
EMD59272	0	0.255867	33.3979	61.8273	23.8703	0.127933	47.6126	372.167	8.53981	0.0226342	1	HET-domain-containing protein	810	20	0	78	-	-	-	-	-	-	-	-	-	-
EMD59238	631.697	562.011	0	0	298.427	596.854	0	0	#NAME?	0.0040799	1	g-protein beta wd-40 repeat-containing protein	1914	20	0	72.9	-	-	-	-	-	-	-	-	-	-
EMD59432	117.891	89.0416	0	0	51.7332	103.466	0	0	#NAME?	0.0282586	1	delta 8-(E)-sphingolipid desaturase	1704	20	0	95.77	4	P:GO:0006665; F:GO:0008812; C:GO:0016021; F:GO:0050660	P:sphingolipid metabolic process; F:choline dehydrogenase activity; C:integral component of membrane; F:flavin adenine dinucleotide binding	EC:1.1; EC:1; EC:1.1.99.1	Acting on the CH-OH group of donors; Oxidoreductases; Choline dehydrogenase	-	-	-	-	-
EMD59316	82.222	77.5276	0	0	39.9374	79.8748	0	0	#NAME?	0.0444249	1	uba ts-n domain containing protein	4284	20	0	94.11	6	F:GO:0003779; F:GO:0005509; C:GO:0005886; P:GO:0006897; C:GO:0010008; C:GO:0030479	F:actin binding; F:calcium ion binding; C:plasma membrane; P:endocytosis; C:endosome membrane; C:actin cortical patch	-	-	-	-	-	K12472	Endocytosis;
EMD59067	140.305	133.562	0	7.72841	70.3991	136.934	3.86421	0.0282195	-5.14716	0.0492488	1	uncharacterized protein COCSADRAFT_263112	1266	20	0	78.65	1	C:GO:0016021	C:integral component of membrane	-	-	-	-	-	-	-
EMD58903	256.364	254.715	16.6989	0	131.945	255.54	8.34947	0.0326739	-4.93572	0.0377649	1	lipase/serine esteras-like protein	1335	20	0	90.66	2	C:GO:0016021; P:GO:0016042	C:integral component of membrane; P:lipid catabolic process	-	-	-	-	-	-	-
EMD58889	227.377	233.606	16.6989	0	119.42	230.491	8.34947	0.0362247	-4.78688	0.0430818	1	glycoside hydrolase family 72 protein	1365	20	0	90.02	5	C:GO:0005886; C:GO:0016021; F:GO:0016740; F:GO:0016787; C:GO:0031225	C:plasma membrane; C:integral component of membrane; F:transferase activity; F:hydrolase activity; C:anchored component of membrane	EC:2; EC:3	Transferases; Hydrolases	-	-	-	-	-
EMD58801	223.066	238.084	0	15.4568	119.152	230.575	7.72841	0.033518	-4.89892	0.0432133	1	DNAJ domain containing protein	1788	20	0	78.92	-	-	-	-	-	-	-	-	-	-
EMD58872	131.792	136.249	0	0	67.0103	134.021	0	0	#NAME?	0.0183237	1	C6 zinc finger domain containing protein	2292	20	0	92.77	7	F:GO:0000981; F:GO:0003677; F:GO:0004674; C:GO:0005634; P:GO:0006357; P:GO:0006468; F:GO:0008270	F:DNA-binding transcription factor activity, RNA polymerase II-specific; F:DNA binding; F:protein serine/threonine kinase activity; C:nucleus; P:regulation of transcription by RNA polymerase II; P:protein phosphorylation; F:zinc ion binding	EC:2.7.1; EC:2.7; EC:2	Transferring phosphorus-containing groups; Transferring phosphorus-containing groups; Transferases	-	-	-	-	-
EMD58991	96.3387	104.394	0	0	50.1831	100.366	0	0	#NAME?	0.0297871	1	sterol regulatory element binding protein sre1 protein	3150	20	0	89.97	3	P:GO:0032933; P:GO:0045944; F:GO:0046983	P:SREBP signaling pathway; P:positive regulation of transcription by RNA polymerase II; F:protein dimerization activity	-	-	-	-	-	-	-
EMD59112	155.931	143.541	0	0	74.868	149.736	0	0	#NAME?	0.015333	1	alpha-L-rhamnosidase A	2712	20	0	92.54	2	P:GO:0005975; F:GO:0030596	P:carbohydrate metabolic process; F:alpha-L-rhamnosidase activity	EC:3.2; EC:3.2.1.40; EC:3; EC:3.2.1	Glycosylases; Alpha-L-rhamnosidase; Hydrolases; Glycosylases	-	-	-	-	-
EMD58962	96.8775	91.6003	0	0	47.1194	94.2389	0	0	#NAME?	0.0332334	1	glutathione peroxidase gpx1	507	20	2.12942E-119	97.28	7	F:GO:0004602; C:GO:0005739; C:GO:0005829; F:GO:0008379; P:GO:0042744; P:GO:0045454; P:GO:0061692	F:glutathione peroxidase activity; C:mitochondrion; C:cytosol; F:thioredoxin peroxidase activity; P:hydrogen peroxide catabolic process; P:cell redox homeostasis; P:cellular detoxification of hydrogen peroxide	EC:1.11; EC:1; EC:1.11.1.24; EC:1.11.1; EC:1.11.1.9	Acting on a peroxide as acceptor; Oxidoreductases; n/a; Acting on a peroxide as acceptor; Glutathione peroxidase	-	-	-	-	-
EMD59012	174.681	151.857	0	0	81.6345	163.269	0	0	#NAME?	0.0133947	1	uncharacterized protein COCSADRAFT_204080	426	20	4.98128E-98	65.7	-	-	-	-	-	-	-	-	-	-
EMD58862	116.059	115.012	0	0	57.7678	115.536	0	0	#NAME?	0.0234182	1	indoleamine 2,3-dioxygenase alpha type	1473	20	0	95.81	5	P:GO:0019441; F:GO:0020037; F:GO:0033754; P:GO:0034354; F:GO:0046872	P:tryptophan catabolic process to kynurenine; F:heme binding; F:indoleamine 2,3-dioxygenase activity; P:'de novo' NAD biosynthetic process from tryptophan; F:metal ion binding	EC:1.13.11; EC:1.13; EC:1.13.11.52; EC:1	Acting on single donors with incorporation of molecular oxygen (oxygenases). The oxygen incorporated need not be derived from O(2); Acting on single donors with incorporation of molecular oxygen (oxygenases). The oxygen incorporated need not be derived from O(2); Indoleamine 2,3-dioxygenase; Oxidoreductases	-	-	-	K00463	Metabolic pathways; Biosynthesis of cofactors; Tryptophan metabolism;
EMD59047	596.459	628.537	0	30.9137	313.977	612.498	15.4568	0.0252357	-5.30839	0.0380398	1	gtp-binding protein 1	3441	20	0	93.94	5	F:GO:0003924; F:GO:0005525; P:GO:0019441; F:GO:0020037; F:GO:0046872	F:GTPase activity; F:GTP binding; P:tryptophan catabolic process to kynurenine; F:heme binding; F:metal ion binding	EC:3.6.1; EC:3.6; EC:3; EC:3.6.1.15	Acting on acid anhydrides; Acting on acid anhydrides; Hydrolases; Nucleoside-triphosphate phosphatase	-	-	-	-	-
EMD58563	1095.07	1262.45	0	0	589.379	1178.76	0	0	#NAME?	0.0052185	1	inositolphosphorylceramide-B C-26 hydroxylase	1179	20	0	94.78	12	F:GO:0003723; F:GO:0005506; C:GO:0005634; C:GO:0005789; P:GO:0006397; P:GO:0006633; P:GO:0006673; F:GO:0008270; C:GO:0016021; F:GO:0020037; P:GO:0046513; F:GO:0080132	F:RNA binding; F:iron ion binding; C:nucleus; C:endoplasmic reticulum membrane; P:mRNA processing; P:fatty acid biosynthetic process; P:inositol phosphoceramide metabolic process; F:zinc ion binding; C:integral component of membrane; F:heme binding; P:ceramide biosynthetic process; F:fatty acid alpha-hydroxylase activity	EC:1	Oxidoreductases	-	-	-	-	-
EMD58731	77.5882	86.9947	0	0	41.1457	82.2915	0	0	#NAME?	0.0421577	1	predicted protein	411	20	4.9146E-35	89.77	-	-	-	-	-	-	-	-	-	-
EMD58636	370.591	368.448	0	0	184.76	369.52	0	0	#NAME?	0.00497313	1	uncharacterized protein COCSADRAFT_41750	762	20	1.02457E-112	72.33	-	-	-	-	-	-	-	-	-	-
EMD58720	325.547	336.081	0	0	165.407	330.814	0	0	#NAME?	0.00547186	1	Gag/polymerase/env polyprotein	294	20	6.85859E-66	86.15	4	F:GO:0003723; C:GO:0005634; P:GO:0006338; P:GO:0015074	F:RNA binding; C:nucleus; P:chromatin remodeling; P:DNA integration	-	-	-	-	-	-	-
EMD58742	90.5196	83.0288	0	0	43.3871	86.7742	0	0	#NAME?	0.038401	1	predicted protein	1080	20	0	79.21	-	-	-	-	-	-	-	-	-	-
EMD58746	460.033	457.234	0	0	229.317	458.634	0	0	#NAME?	0.004331	1	Ribokinase-like protein	1047	20	0	97.35	5	F:GO:0004001; P:GO:0006144; P:GO:0006166; P:GO:0016310; P:GO:0044209	F:adenosine kinase activity; P:purine nucleobase metabolic process; P:purine ribonucleoside salvage; P:phosphorylation; P:AMP salvage	EC:2.7.1; EC:2.7; EC:2; EC:2.7.1.20	Transferring phosphorus-containing groups; Transferring phosphorus-containing groups; Transferases; Adenosine kinase	-	-	-	K00856	Metabolic pathways; Nucleotide metabolism; Purine metabolism;
EMD58728	66.0577	85.0757	0	0	37.7834	75.5667	0	0	#NAME?	0.0489822	1	uncharacterized protein COCSADRAFT_154445	1677	20	0	90.84	-	-	-	-	-	-	-	-	-	-
EMD58749	89.3342	83.7964	0	0	43.2826	86.5653	0	0	#NAME?	0.0385643	1	SPRY domain-containing protein	1584	20	0	92.24	3	C:GO:0005774; C:GO:0010008; C:GO:0016021	C:vacuolar membrane; C:endosome membrane; C:integral component of membrane	-	-	-	-	-	-	-
EMD58494	451.628	428.705	33.3979	0	228.433	440.166	16.6989	0.0379378	-4.72022	0.0466442	1	alpha beta-hydrolase	540	20	4.63224E-68	81.69	2	P:GO:0006569; F:GO:0016787	P:tryptophan catabolic process; F:hydrolase activity	EC:3	Hydrolases	-	-	-	-	-
EMD58335	941.835	985.855	0	0	481.922	963.845	0	0	#NAME?	0.00472453	1	BNR repeat domain-containing protein	1254	20	0	72.69	-	-	-	-	-	-	-	-	-	-
EMD58355	366.389	411.178	0	0	194.392	388.783	0	0	#NAME?	0.00478476	1	Zinc knuckle	165	15	3.67936E-30	89.83	-	-	-	-	-	-	-	-	-	-
EMD58228	116.49	105.161	0	0	55.4128	110.826	0	0	#NAME?	0.0251247	1	WD40-repeat-containing domain protein	4500	20	0	77.49	2	C:GO:0016020; C:GO:0031410	C:membrane; C:cytoplasmic vesicle	-	-	-	-	-	-	-
EMD58206	0	0	0	30.9137	7.72841	0	15.4568	Inf	Inf	0.0447996	1	NRPS protein	708	20	1.69679E-172	66.24	1	F:GO:0003824	F:catalytic activity	-	-	-	-	-	-	-
EMD58150	0	0	0	30.9137	7.72841	0	15.4568	Inf	Inf	0.0447996	1	uncharacterized protein COCSADRAFT_355650	1167	7	0	66.51	-	-	-	-	-	-	-	-	-	-
EMD58146	162.827	160.301	0	0	80.782	161.564	0	0	#NAME?	0.0136139	1	uncharacterized protein COCSADRAFT_42094	1194	20	0	82.95	2	F:GO:0003676; F:GO:0008270	F:nucleic acid binding; F:zinc ion binding	-	-	-	-	-	-	-
EMD58077	1103.8	1114.81	16.6989	23.1852	564.624	1109.31	19.9421	0.0179771	-5.7977	0.0430135	1	Zinc knuckle	468	20	9.92245E-110	77.07	2	F:GO:0003676; F:GO:0008270	F:nucleic acid binding; F:zinc ion binding	-	-	-	-	-	-	-
EMD58078	576.631	555.103	0	15.4568	286.798	565.867	7.72841	0.0136576	-6.19415	0.0188622	1	Zinc knuckle	390	19	1.52994E-87	72.54	2	F:GO:0003676; F:GO:0008270	F:nucleic acid binding; F:zinc ion binding	-	-	-	-	-	-	-
EMD58070	278.348	319.066	0	7.72841	151.285	298.707	3.86421	0.0129365	-6.27241	0.0168413	1	retropepsin-like domain-containing protein	324	20	3.26868E-71	86.72	-	-	-	-	-	-	-	-	-	-

## Sheet: BS_SI Upregulated
genes	BS.1	BS.2	SI.1	SI.2	normalised_count	normalised_count_BS	normalised_count_SI	foldChange	log2FoldChange	pval	padj	Description	Length	#Hits	e-Value	sim mean	#GO	GO IDs	GO Names	Enzyme Codes	Enzyme Names	InterPro IDs	InterPro GO IDs	InterPro GO Names	Cross-reference (KO)	KEGG-pathways
EMD67872	0	0	50.0968	15.4568	16.3884	0	32.7768	Inf	Inf	0.0130838	1	PKSKA1	7164	20	0	80.71	7	F:GO:0003723; F:GO:0004315; P:GO:0006633; F:GO:0008270; C:GO:0016021; F:GO:0016491; F:GO:0031177	F:RNA binding; F:3-oxoacyl-[acyl-carrier-protein] synthase activity; P:fatty acid biosynthetic process; F:zinc ion binding; C:integral component of membrane; F:oxidoreductase activity; F:phosphopantetheine binding	EC:2.3.1.85; EC:2.3.1.41; EC:2.3; EC:1; EC:2; EC:2.3.1	Fatty-acid synthase; Beta-ketoacyl-[acyl-carrier-protein] synthase I; Acyltransferases; Oxidoreductases; Transferases; Acyltransferases	-	-	-	-	-
EMD66015	0	0	0	30.9137	7.72841	0	15.4568	Inf	Inf	0.0447996	1	MdlB ABC-type multidrug transport system ATPase and permease component	3987	20	0	92.73	4	F:GO:0005524; C:GO:0016021; P:GO:0055085; F:GO:0140359	F:ATP binding; C:integral component of membrane; P:transmembrane transport; F:ABC-type transporter activity	EC:7	n/a	-	-	-	K05658	ABC transporters;
EMD65849	0	0	0	30.9137	7.72841	0	15.4568	Inf	Inf	0.0447996	1	cytochrome P450	1161	20	0	84.32	4	F:GO:0004497; F:GO:0005506; F:GO:0016705; F:GO:0020037	F:monooxygenase activity; F:iron ion binding; F:oxidoreductase activity, acting on paired donors, with incorporation or reduction of molecular oxygen; F:heme binding	EC:1; EC:1.14	Oxidoreductases; Acting on paired donors, with incorporation or reduction of molecular oxygen. The oxygen incorporated need not be derived from O(2)	-	-	-	-	-
EMD65848	0	0	83.4947	77.2841	40.1947	0	80.3894	Inf	Inf	0.00173546	1	D-xylulose 5-phosphate/D-fructose 6-phosphate phosphoketolase	2427	20	0	88.33	2	P:GO:0005975; F:GO:0016832	P:carbohydrate metabolic process; F:aldehyde-lyase activity	EC:4.1.2; EC:4.1; EC:4	Carbon-carbon lyases; Carbon-carbon lyases; Lyases	-	-	-	K01621	Metabolic pathways; Microbial metabolism in diverse environments; Pentose phosphate pathway; Carbon fixation in photosynthetic organisms;
EMD64903	0	0	16.6989	30.9137	11.9032	0	23.8063	Inf	Inf	0.0237026	1	dihydrodipicolinate synthase	972	20	0	99.58	1	F:GO:0016829	F:lyase activity	EC:4	Lyases	-	-	-	K01714	Metabolic pathways; Biosynthesis of secondary metabolites; Microbial metabolism in diverse environments; Biosynthesis of amino acids; Lysine biosynthesis; Monobactam biosynthesis;
EMD62774	0	0	0	30.9137	7.72841	0	15.4568	Inf	Inf	0.0447996	1	FAD-binding domain-containing protein	597	14	7.00506E-146	58.19	2	F:GO:0016491; F:GO:0050660	F:oxidoreductase activity; F:flavin adenine dinucleotide binding	-	-	-	-	-	-	-
EMD62759	0.538807	0.3838	100.194	216.396	79.378	0.461304	158.295	343.146	8.42268	0.0163106	1	CENPB domain containing protein	168	20	2.12169E-30	83.97	2	F:GO:0003677; C:GO:0005634	F:DNA binding; C:nucleus	-	-	-	-	-	-	-
EMD59272	0	0.255867	33.3979	61.8273	23.8703	0.127933	47.6126	372.167	8.53981	0.0226342	1	HET-domain-containing protein	810	20	0	78	-	-	-	-	-	-	-	-	-	-
EMD58206	0	0	0	30.9137	7.72841	0	15.4568	Inf	Inf	0.0447996	1	NRPS protein	708	20	1.69679E-172	66.24	1	F:GO:0003824	F:catalytic activity	-	-	-	-	-	-	-
EMD58150	0	0	0	30.9137	7.72841	0	15.4568	Inf	Inf	0.0447996	1	uncharacterized protein COCSADRAFT_355650	1167	7	0	66.51	-	-	-	-	-	-	-	-	-	-

## Sheet: BS_SI Downregulated
genes	BS.1	BS.2	SI.1	SI.2	normalised_count	normalised_count_BS	normalised_count_SI	foldChange	log2FoldChange	pval	padj	Description	Length	#Hits	e-Value	sim mean	#GO	GO IDs	GO Names	Enzyme Codes	Enzyme Names	InterPro IDs	InterPro GO IDs	InterPro GO Names	Cross-reference (KO)	KEGG-pathways
EMD69113	79.5279	73.5617	0	0	38.2724	76.5448	0	0	#NAME?	0.0478808	1	putative glycosyl transferase family 2 protein	711	20	6.76184E-75	92.8	1	F:GO:0016740	F:transferase activity	EC:2	Transferases	-	-	-	-	-
EMD69785	84.1617	78.5511	0	0	40.6782	81.3564	0	0	#NAME?	0.0430109	1	alcohol dehydrogenase	1050	20	0	97.71	1	F:GO:0016491	F:oxidoreductase activity	EC:1	Oxidoreductases	-	-	-	-	-
EMD69701	458.309	426.146	16.6989	15.4568	229.153	442.228	16.0779	0.0363566	-4.78164	0.0465181	1	glycoside hydrolase family 16 protein	1365	20	0	91.46	2	F:GO:0004553; P:GO:0005975	F:hydrolase activity, hydrolyzing O-glycosyl compounds; P:carbohydrate metabolic process	EC:3.2; EC:3; EC:3.2.1	Glycosylases; Hydrolases; Glycosylases	-	-	-	-	-
EMD68979	271.559	253.18	0	0	131.185	262.369	0	0	#NAME?	0.00698669	1	uncharacterized protein COCSADRAFT_176835	519	20	5.00701E-106	74.89	-	-	-	-	-	-	-	-	-	-
EMD69143	759.718	734.849	0	0	373.642	747.284	0	0	#NAME?	0.0042411	1	uncharacterized protein COCSADRAFT_31904	465	20	4.48082E-67	82.07	-	-	-	-	-	-	-	-	-	-
EMD69037	81.7909	75.4807	0	0	39.3179	78.6358	0	0	#NAME?	0.0456636	1	Cytochrome P450 monooxygenase aclL	1527	20	0	90.89	5	F:GO:0004497; F:GO:0005506; C:GO:0016021; F:GO:0016705; F:GO:0020037	F:monooxygenase activity; F:iron ion binding; C:integral component of membrane; F:oxidoreductase activity, acting on paired donors, with incorporation or reduction of molecular oxygen; F:heme binding	EC:1; EC:1.14	Oxidoreductases; Acting on paired donors, with incorporation or reduction of molecular oxygen. The oxygen incorporated need not be derived from O(2)	-	-	-	-	-
EMD69861	82.222	74.969	0	0	39.2977	78.5955	0	0	#NAME?	0.0457047	1	uncharacterized protein COCSADRAFT_32526	1029	20	0	74.8	2	F:GO:0003676; F:GO:0008270	F:nucleic acid binding; F:zinc ion binding	-	-	-	-	-	-	-
EMD70145	156.47	124.223	0	0	70.1732	140.346	0	0	#NAME?	0.0170031	1	TRP-domain-containing protein	2178	20	0	95.81	2	C:GO:0016021; F:GO:0016874	C:integral component of membrane; F:ligase activity	EC:6	Ligases	-	-	-	-	-
EMD69144	188.259	197.401	0	0	96.4151	192.83	0	0	#NAME?	0.0104562	1	uncharacterized protein COCSADRAFT_186131	381	20	2.87834E-87	72.34	2	C:GO:0016020; C:GO:0016021	C:membrane; C:integral component of membrane	-	-	-	-	-	-	-
EMD69278	87.0712	80.2142	0	0	41.8214	83.6427	0	0	#NAME?	0.0409638	1	glycoside hydrolase family 76 protein	1350	20	0	92.88	5	F:GO:0008168; F:GO:0008496; C:GO:0016021; P:GO:0016052; P:GO:0032259	F:methyltransferase activity; F:mannan endo-1,6-alpha-mannosidase activity; C:integral component of membrane; P:carbohydrate catabolic process; P:methylation	EC:2.1; EC:3.2; EC:3.2.1.101; EC:2; EC:3; EC:3.2.1.24; EC:2.1.1; EC:3.2.1	Transferring one-carbon groups; Glycosylases; Mannan endo-1,6-alpha-mannosidase; Transferases; Hydrolases; Alpha-mannosidase; Transferring one-carbon groups; Glycosylases	-	-	-	-	-
EMD69199	117.244	113.221	0	0	57.6164	115.233	0	0	#NAME?	0.0235216	1	Calcipressin-domain-containing protein	783	20	1.77936E-165	96.72	2	F:GO:0003676; P:GO:0019722	F:nucleic acid binding; P:calcium-mediated signaling	-	-	-	-	-	-	-
EMD69983	82.653	100.3	0	0	45.7382	91.4764	0	0	#NAME?	0.0350107	1	uncharacterized protein COCSADRAFT_342083	768	7	0	71.31	-	-	-	-	-	-	-	-	-	-
EMD69284	343.759	327.509	8.34947	0	169.904	335.634	4.17474	0.0124384	-6.32906	0.0148854	1	FAS1 domain-containing protein	1356	20	0	87.53	-	-	-	-	-	-	-	-	-	-
EMD70119	366.712	393.139	0	15.4568	193.827	379.926	7.72841	0.0203419	-5.6194	0.0245183	1	von Willebrand domain containing protein	2712	20	0	86.18	1	C:GO:0005643	C:nuclear pore	-	-	-	-	-	-	-
EMD69254	68.5363	83.5405	0	0	38.0192	76.0384	0	0	#NAME?	0.0484483	1	ADAM 8 precursor	2421	20	0	91.33	8	F:GO:0003987; F:GO:0004222; F:GO:0005524; P:GO:0006508; P:GO:0007229; C:GO:0016021; F:GO:0016208; P:GO:0019427	F:acetate-CoA ligase activity; F:metalloendopeptidase activity; F:ATP binding; P:proteolysis; P:integrin-mediated signaling pathway; C:integral component of membrane; F:AMP binding; P:acetyl-CoA biosynthetic process from acetate	EC:3.4.24; EC:3.4; EC:6.2; EC:3; EC:6; EC:6.2.1.1; EC:6.2.1	Acting on peptide bonds (peptidases); Acting on peptide bonds (peptidases); Forming carbon-sulfur bonds; Hydrolases; Ligases; Acetate--CoA ligase; Forming carbon-sulfur bonds	-	-	-	-	-
EMD69902	233.842	205.589	0	0	109.858	219.716	0	0	#NAME?	0.00872726	1	glycoside hydrolase family 17 protein	1443	20	0	92.19	1	F:GO:0016787	F:hydrolase activity	EC:3	Hydrolases	-	-	-	K01199	Metabolic pathways; Starch and sucrose metabolism;
EMD69264	306.15	339.151	0	0	161.325	322.651	0	0	#NAME?	0.00560264	1	NAC-domain-containing protein	690	20	1.58378E-128	81.5	2	C:GO:0005634; C:GO:0005737	C:nucleus; C:cytoplasm	-	-	-	-	-	-	-
EMD69723	131.9	141.878	0	0	68.4445	136.889	0	0	#NAME?	0.0177043	1	gpi anchored serine-threonine rich protein	747	20	3.38596E-114	79.04	1	C:GO:0110165	C:cellular anatomical entity	-	-	-	-	-	-	-
EMD68114	107.007	111.302	0	0	54.5773	109.155	0	0	#NAME?	0.0257843	1	polyubiquitin	918	20	0	100	3	F:GO:0003729; C:GO:0005634; C:GO:0005737	F:mRNA binding; C:nucleus; C:cytoplasm	-	-	-	-	-	K08770	Ubiquitin mediated proteolysis;
EMD68918	3066.89	2957.56	16.6989	7.72841	1512.22	3012.23	12.2137	0.0040547	-7.94619	0.027977	1	pyruvate decarboxylase	1722	20	0	97.21	3	F:GO:0000287; F:GO:0004737; F:GO:0030976	F:magnesium ion binding; F:pyruvate decarboxylase activity; F:thiamine pyrophosphate binding	EC:4.1.1; EC:4.1.1.1; EC:4.1; EC:4	Carbon-carbon lyases; Pyruvate decarboxylase; Carbon-carbon lyases; Lyases	-	-	-	K01568	Metabolic pathways; Biosynthesis of secondary metabolites; Glycolysis_Gluconeogenesis;
EMD68711	104.529	108.999	0	0	53.3819	106.764	0	0	#NAME?	0.0267789	1	acetylcholinesterase precursor	1650	20	0	88.96	1	F:GO:0016787	F:hydrolase activity	EC:3	Hydrolases	-	-	-	-	-
EMD68545	79.5279	75.0969	0	0	38.6562	77.3124	0	0	#NAME?	0.0470482	1	uncharacterized protein COCSADRAFT_109171	1464	20	0	80.4	-	-	-	-	-	-	-	-	-	-
EMD68321	650.125	693.783	0	0	335.977	671.954	0	0	#NAME?	0.00413218	1	tyrosinase family protein	861	20	0	80.89	1	F:GO:0016491	F:oxidoreductase activity	EC:1	Oxidoreductases	-	-	-	K00505	Metabolic pathways; Biosynthesis of secondary metabolites; Tyrosine metabolism; Isoquinoline alkaloid biosynthesis; Betalain biosynthesis;
EMD68142	130.607	124.607	0	0	63.8035	127.607	0	0	#NAME?	0.0198544	1	CTP-transf-1 domain containing protein	1431	20	0	93.39	5	F:GO:0004143; C:GO:0016021; P:GO:0016310; F:GO:0016779; F:GO:0016874	F:diacylglycerol kinase activity; C:integral component of membrane; P:phosphorylation; F:nucleotidyltransferase activity; F:ligase activity	EC:2.7.1; EC:2.7; EC:2; EC:2.7.7; EC:6; EC:2.7.1.107	Transferring phosphorus-containing groups; Transferring phosphorus-containing groups; Transferases; Transferring phosphorus-containing groups; Ligases; Diacylglycerol kinase (ATP)	-	-	-	K16368	Metabolic pathways; Biosynthesis of secondary metabolites; Glycerophospholipid metabolism;
EMD68702	104.852	108.999	0	0	53.4628	106.926	0	0	#NAME?	0.0267096	1	carbohydrate-binding module family 43 protein	1608	20	0	90.92	5	C:GO:0005886; C:GO:0031225; F:GO:0042123; P:GO:0071840; P:GO:0071852	C:plasma membrane; C:anchored component of membrane; F:glucanosyltransferase activity; P:cellular component organization or biogenesis; P:fungal-type cell wall organization or biogenesis	EC:2	Transferases	-	-	-	-	-
EMD68791	268.865	262.135	0	0	132.75	265.5	0	0	#NAME?	0.00689084	1	protein translation factor sui1	354	20	6.76599E-65	97.91	3	F:GO:0003743; C:GO:0005840; P:GO:0006413	F:translation initiation factor activity; C:ribosome; P:translational initiation	-	-	-	-	-	-	-
EMD68450	79.3124	83.2846	0	0	40.6493	81.2985	0	0	#NAME?	0.0430668	1	globin-like protein	912	20	0	85.75	2	F:GO:0019825; F:GO:0020037	F:oxygen binding; F:heme binding	-	-	-	-	-	-	-
EMD68064	80.6055	73.9455	0	0	38.6378	77.2755	0	0	#NAME?	0.0470872	1	cell lysis protein-like protein	1143	20	0	89.04	2	C:GO:0005789; C:GO:0016021	C:endoplasmic reticulum membrane; C:integral component of membrane	-	-	-	-	-	-	-
EMD67977	75.5407	85.7154	0	0	40.314	80.6281	0	0	#NAME?	0.0437003	1	uncharacterized protein COCSADRAFT_32936	1911	20	0	82.06	-	-	-	-	-	-	-	-	-	-
EMD68134	103.559	123.456	0	0	56.7536	113.507	0	0	#NAME?	0.0241296	1	carbohydrate esterase family 5 protein	1113	20	7.35487E-157	95.92	2	F:GO:0050525; F:GO:0080030	F:cutinase activity; F:methyl indole-3-acetate esterase activity	EC:3.1; EC:3; EC:3.1.1.74; EC:3.1.1.1	Acting on ester bonds; Hydrolases; Cutinase; Carboxylesterase	-	-	-	-	-
EMD68685	85.4548	85.3316	0	0	42.6966	85.3932	0	0	#NAME?	0.0395001	1	60S ribosomal protein L29	246	20	3.76009E-38	98.59	3	P:GO:0002181; F:GO:0003735; C:GO:0022625	P:cytoplasmic translation; F:structural constituent of ribosome; C:cytosolic large ribosomal subunit	-	-	-	-	-	K02905	Ribosome;
EMD68022	231.687	268.276	16.6989	0	129.166	249.982	8.34947	0.0334003	-4.90399	0.0388203	1	tata-box-binding protein	750	20	0	98.36	23	C:GO:0000120; C:GO:0000126; F:GO:0000979; F:GO:0001006; F:GO:0001092; F:GO:0001179; P:GO:0001188; F:GO:0003682; F:GO:0004674; C:GO:0005669; C:GO:0005672; P:GO:0006359; P:GO:0006468; F:GO:0008301; F:GO:0016251; P:GO:0042790; P:GO:0045892; P:GO:0045944; P:GO:0051123; F:GO:0061629; P:GO:0070893; P:GO:0070898; F:GO:0097718	C:RNA polymerase I transcription regulator complex; C:transcription factor TFIIIB complex; F:RNA polymerase II core promoter sequence-specific DNA binding; F:RNA polymerase III type 3 promoter sequence-specific DNA binding; F:TFIIA-class transcription factor complex binding; F:RNA polymerase I general transcription initiation factor binding; P:RNA polymerase I preinitiation complex assembly; F:ch…	EC:2.7.1; EC:2.7; EC:2	Transferring phosphorus-containing groups; Transferring phosphorus-containing groups; Transferases	-	-	-	K03120	Basal transcription factors;
EMD68764	79.8512	76.1204	0	0	38.9929	77.9858	0	0	#NAME?	0.046336	1	putative bicyclomycin resistance protein	1512	20	0	87.36	6	F:GO:0003677; P:GO:0006351; F:GO:0008270; C:GO:0016021; F:GO:0022857; P:GO:0055085	F:DNA binding; P:DNA-templated transcription; F:zinc ion binding; C:integral component of membrane; F:transmembrane transporter activity; P:transmembrane transport	EC:7	n/a	-	-	-	-	-
EMD68102	121.878	123.456	0	0	61.3335	122.667	0	0	#NAME?	0.0211916	1	uncharacterized protein COCSADRAFT_33064	1881	20	0	87.02	-	-	-	-	-	-	-	-	-	-
EMD68097	192.246	180.002	0	0	93.0622	186.124	0	0	#NAME?	0.0110049	1	globin-like protein	1299	20	0	87.81	9	F:GO:0005344; F:GO:0008941; P:GO:0015671; C:GO:0016021; F:GO:0019825; F:GO:0020037; F:GO:0046872; P:GO:0051409; F:GO:0071949	F:oxygen carrier activity; F:nitric oxide dioxygenase activity; P:oxygen transport; C:integral component of membrane; F:oxygen binding; F:heme binding; F:metal ion binding; P:response to nitrosative stress; F:FAD binding	EC:1.14.12; EC:1.14.12.17; EC:1; EC:1.14	Acting on paired donors, with incorporation or reduction of molecular oxygen. The oxygen incorporated need not be derived from O(2); Nitric oxide dioxygenase; Oxidoreductases; Acting on paired donors, with incorporation or reduction of molecular oxygen. The oxygen incorporated need not be derived from O(2)	-	-	-	-	-
EMD68063	129.421	152.241	0	0	70.4155	140.831	0	0	#NAME?	0.0169114	1	ubiquitin carrier	1149	20	0	85.63	1	C:GO:0016021	C:integral component of membrane	-	-	-	-	-	-	-
EMD68406	148.926	99.6601	0	0	62.1466	124.293	0	0	#NAME?	0.0207319	1	uncharacterized protein COCSADRAFT_272519	270	4	2.20336E-58	95.56	-	-	-	-	-	-	-	-	-	-
EMD68765	558.851	555.487	0	0	278.584	557.169	0	0	#NAME?	0.00409312	1	integral membrane protein	1764	20	0	92.43	3	C:GO:0016021; F:GO:0022857; P:GO:0055085	C:integral component of membrane; F:transmembrane transporter activity; P:transmembrane transport	EC:7	n/a	-	-	-	-	-
EMD67971	80.7133	69.5958	0	0	37.5773	75.1545	0	0	#NAME?	0.0494478	1	homeobox and c2h2 domain-containing transcription factor protein	2850	20	0	88.03	3	F:GO:0003677; C:GO:0005634; P:GO:0006355	F:DNA binding; C:nucleus; P:regulation of DNA-templated transcription	-	-	-	-	-	-	-
EMD68605	495.271	520.689	0	0	253.99	507.98	0	0	#NAME?	0.00416713	1	c6 transcription factor	912	20	0	93.34	4	F:GO:0000981; C:GO:0005634; P:GO:0006357; F:GO:0008270	F:DNA-binding transcription factor activity, RNA polymerase II-specific; C:nucleus; P:regulation of transcription by RNA polymerase II; F:zinc ion binding	-	-	-	-	-	-	-
EMD68543	256.149	262.775	0	0	129.731	259.462	0	0	#NAME?	0.00707912	1	uncharacterized protein COCSADRAFT_80326	1209	20	0	90.34	1	C:GO:0016021	C:integral component of membrane	-	-	-	-	-	-	-
EMD67641	146.448	157.87	0	0	76.0794	152.159	0	0	#NAME?	0.01495	1	ubiquitin conjugating enzyme	711	20	1.95786E-154	98.05	13	P:GO:0000082; P:GO:0000086; P:GO:0000209; F:GO:0005524; C:GO:0005634; C:GO:0005737; P:GO:0010828; F:GO:0016874; C:GO:0019005; P:GO:0030466; P:GO:0031146; P:GO:0051865; F:GO:0061630	P:G1/S transition of mitotic cell cycle; P:G2/M transition of mitotic cell cycle; P:protein polyubiquitination; F:ATP binding; C:nucleus; C:cytoplasm; P:positive regulation of glucose transmembrane transport; F:ligase activity; C:SCF ubiquitin ligase complex; P:silent mating-type cassette heterochromatin formation; P:SCF-dependent proteasomal ubiquitin-dependent protein catabolic process; P:prote…	EC:2; EC:6	Transferases; Ligases	-	-	-	K02207	Ubiquitin mediated proteolysis;
EMD67444	92.567	82.3891	0	0	43.739	87.4781	0	0	#NAME?	0.0378596	1	cyanovirin-N family protein	318	20	3.06724E-69	91.07	-	-	-	-	-	-	-	-	-	-
EMD67408	107.438	116.291	0	0	55.9324	111.865	0	0	#NAME?	0.0247315	1	calcium-activated chloride channel-domain-containing protein	2226	20	0	92.32	1	C:GO:0016021	C:integral component of membrane	-	-	-	-	-	-	-
EMD67686	145.909	153.648	0	0	74.8892	149.778	0	0	#NAME?	0.0153268	1	HET-domain-containing protein	1002	20	0	63.27	1	C:GO:0016021	C:integral component of membrane	-	-	-	-	-	-	-
EMD67576	114.874	112.581	0	0	56.8638	113.728	0	0	#NAME?	0.024049	1	c-5 sterol desaturase	1059	20	0	92.98	5	F:GO:0005506; P:GO:0008610; C:GO:0016021; F:GO:0016491; P:GO:0044255	F:iron ion binding; P:lipid biosynthetic process; C:integral component of membrane; F:oxidoreductase activity; P:cellular lipid metabolic process	EC:1	Oxidoreductases	-	-	-	K00227	Metabolic pathways; Biosynthesis of secondary metabolites;
EMD67201	77.9115	76.888	0	0	38.6999	77.3997	0	0	#NAME?	0.0469557	1	H(+)-transporting V1 sector ATPase subunit A	1830	20	0	98.82	14	C:GO:0000221; C:GO:0000329; F:GO:0003924; F:GO:0005524; F:GO:0005525; P:GO:0007035; P:GO:0015986; C:GO:0016021; F:GO:0046933; F:GO:0046961; P:GO:0090463; P:GO:0090464; P:GO:0090465; P:GO:1902600	C:vacuolar proton-transporting V-type ATPase, V1 domain; C:fungal-type vacuole membrane; F:GTPase activity; F:ATP binding; F:GTP binding; P:vacuolar acidification; P:proton motive force-driven ATP synthesis; C:integral component of membrane; F:proton-transporting ATP synthase activity, rotational mechanism; F:proton-transporting ATPase activity, rotational mechanism; P:lysine homeostasis; P:histi…	EC:7.1.3.1; EC:7.1.2.2; EC:3.6.1; EC:3.6; EC:3; EC:6; EC:7; EC:3.6.1.15	n/a; n/a; Acting on acid anhydrides; Acting on acid anhydrides; Hydrolases; Ligases; n/a; Nucleoside-triphosphate phosphatase	-	-	-	K02145	Metabolic pathways; Oxidative phosphorylation;
EMD67319	464.883	473.609	0	30.9137	242.351	469.246	15.4568	0.0329397	-4.92403	0.0444348	1	ABC transporter CDR4	4464	20	0	95.02	5	F:GO:0005524; C:GO:0016021; F:GO:0016874; P:GO:0055085; F:GO:0140359	F:ATP binding; C:integral component of membrane; F:ligase activity; P:transmembrane transport; F:ABC-type transporter activity	EC:6; EC:7	Ligases; n/a	-	-	-	K08711	ABC transporters;
EMD67719	103.128	105.545	0	0	52.1682	104.336	0	0	#NAME?	0.0278572	1	MATH and UCH domain containing protein	4209	20	0	87.27	4	F:GO:0003824; C:GO:0005737; P:GO:0008612; P:GO:0016579	F:catalytic activity; C:cytoplasm; P:peptidyl-lysine modification to peptidyl-hypusine; P:protein deubiquitination	-	-	-	-	-	-	-
EMD67175	362.294	278.767	0	15.4568	164.129	320.53	7.72841	0.0241113	-5.37414	0.0290676	1	uncharacterized protein COCSADRAFT_168399	672	20	2.08754E-147	97.24	-	-	-	-	-	-	-	-	-	-
EMD67769	89.1187	84.436	0	0	43.3887	86.7774	0	0	#NAME?	0.038399	1	multidrug resistance-associated protein 1	4632	20	0	97.33	7	C:GO:0000329; F:GO:0005524; F:GO:0015439; C:GO:0016021; F:GO:0016787; F:GO:0020037; P:GO:0140357	C:fungal-type vacuole membrane; F:ATP binding; F:ABC-type heme transporter activity; C:integral component of membrane; F:hydrolase activity; F:heme binding; P:heme export from vacuole to cytoplasm	EC:7.6.2.5; EC:3; EC:7	n/a; Hydrolases; n/a	-	-	-	K05665	ABC transporters;
EMD66956	240.308	248.958	0	0	122.317	244.633	0	0	#NAME?	0.00760171	1	Endoplasmic oxidoreductin-1	1851	20	0	93.73	5	C:GO:0005789; F:GO:0015035; F:GO:0016972; P:GO:0034975; F:GO:0071949	C:endoplasmic reticulum membrane; F:protein-disulfide reductase activity; F:thiol oxidase activity; P:protein folding in endoplasmic reticulum; F:FAD binding	EC:1; EC:1.8; EC:1.8.3; EC:1.8.3.2	Oxidoreductases; Acting on a sulfur group of donors; Acting on a sulfur group of donors; Thiol oxidase	-	-	-	K10976	-
EMD66954	565.855	469.388	0	0	258.811	517.621	0	0	#NAME?	0.00414637	1	predicted protein	573	20	1.57715E-70	84.89	-	-	-	-	-	-	-	-	-	-
EMD67510	1432.36	1340.74	33.3979	0	701.626	1386.55	16.6989	0.0120435	-6.3756	0.0336969	1	glycosyltransferase family 4 protein	2025	20	0	89.07	1	F:GO:0016757	F:glycosyltransferase activity	EC:2.4; EC:2	Glycosyltransferases; Transferases	-	-	-	-	-
EMD66112	103.451	108.104	0	0	52.8887	105.777	0	0	#NAME?	0.0272086	1	bZIP transcription factor family protein	1815	20	0	90.48	2	F:GO:0003700; P:GO:0006355	F:DNA-binding transcription factor activity; P:regulation of DNA-templated transcription	-	-	-	-	-	-	-
EMD66556	92.7826	96.078	0	0	47.2151	94.4303	0	0	#NAME?	0.0331171	1	flotillin domain-containing protein	1515	20	0	97.1	3	C:GO:0016020; F:GO:0016301; P:GO:0016310	C:membrane; F:kinase activity; P:phosphorylation	EC:2.7; EC:2	Transferring phosphorus-containing groups; Transferases	-	-	-	K07192	-
EMD66219	118.322	113.221	0	0	57.8858	115.772	0	0	#NAME?	0.0233376	1	fre ferric reductase-like transmembrane component	1836	20	0	94.54	3	P:GO:0000041; F:GO:0000293; C:GO:0016021	P:transition metal ion transport; F:ferric-chelate reductase activity; C:integral component of membrane	EC:1.16; EC:1	Oxidizing metal ions; Oxidoreductases	-	-	-	-	-
EMD66672	357.229	325.463	0	0	170.673	341.346	0	0	#NAME?	0.00531752	1	putative MFS-type transporter	1683	20	0	94.12	8	F:GO:0000981; F:GO:0003677; C:GO:0005634; P:GO:0006357; F:GO:0008270; C:GO:0016021; F:GO:0022857; P:GO:0055085	F:DNA-binding transcription factor activity, RNA polymerase II-specific; F:DNA binding; C:nucleus; P:regulation of transcription by RNA polymerase II; F:zinc ion binding; C:integral component of membrane; F:transmembrane transporter activity; P:transmembrane transport	EC:7	n/a	-	-	-	-	-
EMD66829	213.044	202.519	0	0	103.891	207.781	0	0	#NAME?	0.00941364	1	c4-dicarboxylate transporter malic acid transport protein	579	20	7.02085E-126	86.38	-	-	-	-	-	-	-	-	-	-
EMD66110	235.243	224.523	0	0	114.942	229.883	0	0	#NAME?	0.00822415	1	uncharacterized protein COCSADRAFT_137372	705	20	6.12259E-172	66.44	1	C:GO:0016021	C:integral component of membrane	-	-	-	-	-	-	-
EMD66098	722.325	684.188	0	15.4568	355.492	703.256	7.72841	0.0109895	-6.50773	0.0179848	1	HSP20-like chaperone	1122	20	1.45874E-100	92.6	-	-	-	-	-	-	-	-	K13993	-
EMD66152	92.3515	76.6321	0	0	42.2459	84.4918	0	0	#NAME?	0.0402411	1	uncharacterized protein COCSADRAFT_169117	822	20	1.34061E-144	87.05	-	-	-	-	-	-	-	-	-	-
EMD66725	91.8127	95.95	0	0	46.9407	93.8814	0	0	#NAME?	0.0334559	1	atp-dependent rna helicase dbp9	732	20	5.4524E-179	85.29	4	F:GO:0003676; F:GO:0003724; F:GO:0005524; F:GO:0016787	F:nucleic acid binding; F:RNA helicase activity; F:ATP binding; F:hydrolase activity	EC:3.6.4.13; EC:3	RNA helicase; Hydrolases	-	-	-	-	-
EMD66258	335.569	323.927	0	0	164.874	329.748	0	0	#NAME?	0.00548824	1	alternative oxidase	1074	20	0	94.3	5	C:GO:0005743; F:GO:0009916; C:GO:0016021; F:GO:0046872; C:GO:0070469	C:mitochondrial inner membrane; F:alternative oxidase activity; C:integral component of membrane; F:metal ion binding; C:respirasome	EC:1.10; EC:1; EC:1.10.3	Acting on diphenols and related substances as donors; Oxidoreductases; Acting on diphenols and related substances as donors	-	-	-	-	-
EMD66111	101.403	143.03	0	0	61.1082	122.216	0	0	#NAME?	0.0213238	1	uncharacterized protein COCSADRAFT_34696	192	20	1.20236E-36	92.7	-	-	-	-	-	-	-	-	-	-
EMD66509	332.121	354.759	16.6989	7.72841	177.827	343.44	12.2137	0.0355628	-4.81349	0.0420201	1	glycoside hydrolase family 128 protein	1419	20	2.83391E-180	90.7	1	F:GO:0016787	F:hydrolase activity	EC:3	Hydrolases	-	-	-	-	-
EMD65867	95.7999	112.453	0	0	52.0633	104.127	0	0	#NAME?	0.0279553	1	C2H2 finger domain protein	2178	20	0	91.28	1	F:GO:0003677	F:DNA binding	-	-	-	-	-	-	-
EMD65792	99.4638	92.8796	0	0	48.0859	96.1717	0	0	#NAME?	0.0320775	1	DUF1748-domain-containing protein	231	20	3.87409E-48	94.33	-	-	-	-	-	-	-	-	-	-
EMD65717	116.598	123.712	0	0	60.0774	120.155	0	0	#NAME?	0.0219322	1	benomyl/methotrexate resistance protein	1593	20	0	95.33	3	C:GO:0016021; F:GO:0022857; P:GO:0055085	C:integral component of membrane; F:transmembrane transporter activity; P:transmembrane transport	EC:7	n/a	-	-	-	-	-
EMD65353	210.997	207.764	16.6989	0	108.865	209.38	8.34947	0.0398771	-4.6483	0.0489715	1	putative opsin-like protein	921	20	0	90.34	5	F:GO:0005216; P:GO:0007602; F:GO:0009881; C:GO:0016021; P:GO:0034220	F:ion channel activity; P:phototransduction; F:photoreceptor activity; C:integral component of membrane; P:ion transmembrane transport	EC:7	n/a	-	-	-	-	-
EMD65746	102.373	96.4618	0	0	49.7088	99.4175	0	0	#NAME?	0.0302797	1	14-3-3 protein	240	20	2.40954E-50	92.04	1	C:GO:0016021	C:integral component of membrane	-	-	-	-	-	-	-
EMD65374	116.598	121.793	0	0	59.5976	119.195	0	0	#NAME?	0.0222269	1	ribokinase-like protein	981	20	0	90.56	5	C:GO:0016021; F:GO:0016301; P:GO:0016310; F:GO:0016773; P:GO:0071704	C:integral component of membrane; F:kinase activity; P:phosphorylation; F:phosphotransferase activity, alcohol group as acceptor; P:organic substance metabolic process	EC:2.7.1; EC:2.7; EC:2	Transferring phosphorus-containing groups; Transferring phosphorus-containing groups; Transferases	-	-	-	-	-
EMD65754	1042.7	937.112	0	23.1852	500.749	989.906	11.5926	0.0117108	-6.41601	0.026214	1	Zinc knuckle	366	17	2.20094E-65	79.46	2	F:GO:0003676; F:GO:0008270	F:nucleic acid binding; F:zinc ion binding	-	-	-	-	-	-	-
EMD65901	278.132	294.758	0	7.72841	145.155	286.445	3.86421	0.0134902	-6.21194	0.0176532	1	uncharacterized protein COCSADRAFT_198753	4818	20	0	90	-	-	-	-	-	-	-	-	-	-
EMD65613	619.736	650.797	25.0484	15.4568	327.76	635.266	20.2526	0.0318805	-4.97118	0.0484294	1	opsin-1 protein	915	20	0	92.62	5	F:GO:0005216; P:GO:0007602; F:GO:0009881; C:GO:0016021; P:GO:0034220	F:ion channel activity; P:phototransduction; F:photoreceptor activity; C:integral component of membrane; P:ion transmembrane transport	EC:7	n/a	-	-	-	-	-
EMD65780	109.917	105.289	0	0	53.8014	107.603	0	0	#NAME?	0.0264217	1	transglutaminase protein	1326	20	0	96.59	1	C:GO:0016021	C:integral component of membrane	-	-	-	-	-	K01456	-
EMD64665	230.609	256.123	0	0	121.683	243.366	0	0	#NAME?	0.00765099	1	quinate transport protein	1983	20	6.60695E-161	76.06	-	-	-	-	-	-	-	-	-	-
EMD64891	536.652	592.971	0	0	282.406	564.811	0	0	#NAME?	0.00408787	1	ZnF-C2HC domain containing protein	774	20	6.39586E-168	85.25	2	F:GO:0003676; F:GO:0008270	F:nucleic acid binding; F:zinc ion binding	-	-	-	-	-	-	-
EMD65257	237.291	228.233	0	0	116.381	232.762	0	0	#NAME?	0.00809338	1	RVT-1 domain containing protein	246	20	1.81199E-52	92.47	4	F:GO:0003723; C:GO:0005634; P:GO:0006325; P:GO:0015074	F:RNA binding; C:nucleus; P:chromatin organization; P:DNA integration	-	-	-	-	-	-	-
EMD65076	76.9416	78.0394	0	0	38.7453	77.4905	0	0	#NAME?	0.0468594	1	lysosomal cystine transporter	846	20	0	76.16	-	-	-	-	-	-	-	-	-	-
EMD65260	428.459	488.194	0	0	229.163	458.327	0	0	#NAME?	0.00433251	1	uncharacterized protein COCSADRAFT_160226	189	6	5.51879E-36	91.96	-	-	-	-	-	-	-	-	-	-
EMD64972	932.352	897.836	33.3979	0	465.896	915.094	16.6989	0.0182483	-5.77609	0.0347533	1	hypothetical protein, partial	600	1	8.94074E-06	60	-	-	-	-	-	-	-	-	-	-
EMD65087	422.532	384.056	0	15.4568	205.511	403.294	7.72841	0.0191632	-5.70552	0.0232571	1	Inositol-3-phosphate synthase	1611	20	0	97.81	3	F:GO:0004512; P:GO:0006021; P:GO:0008654	F:inositol-3-phosphate synthase activity; P:inositol biosynthetic process; P:phospholipid biosynthetic process	EC:5; EC:5.5.1.4; EC:5.5.1	Isomerases; Inositol-3-phosphate synthase; Intramolecular lyases	-	-	-	K01858	Metabolic pathways; Biosynthesis of secondary metabolites; Inositol phosphate metabolism; Streptomycin biosynthesis;
EMD65071	109.486	119.874	0	0	57.3398	114.68	0	0	#NAME?	0.0237141	1	arrestin domain containing protein	2385	20	0	94.46	-	-	-	-	-	-	-	-	-	-
EMD64635	263.369	279.023	0	0	135.598	271.196	0	0	#NAME?	0.00672492	1	antigenic thaumatin-like protein	855	20	4.85662E-164	77.42	-	-	-	-	-	-	-	-	-	-
EMD64890	174.897	208.276	0	0	95.7931	191.586	0	0	#NAME?	0.0105543	1	RVT-1 domain containing protein	510	20	5.58732E-85	88.42	-	-	-	-	-	-	-	-	-	-
EMD64605	130.607	145.46	0	0	69.0168	138.034	0	0	#NAME?	0.0174675	1	Lon protease	3297	20	0	96.03	10	F:GO:0004176; F:GO:0004252; F:GO:0005524; C:GO:0005759; P:GO:0006515; F:GO:0016887; P:GO:0034599; F:GO:0043565; P:GO:0051131; P:GO:0070407	F:ATP-dependent peptidase activity; F:serine-type endopeptidase activity; F:ATP binding; C:mitochondrial matrix; P:protein quality control for misfolded or incompletely synthesized proteins; F:ATP hydrolysis activity; P:cellular response to oxidative stress; F:sequence-specific DNA binding; P:chaperone-mediated protein complex assembly; P:oxidation-dependent protein catabolic process	EC:3.4.21; EC:3.6.1; EC:3.4; EC:3.6; EC:3; EC:3.6.1.15	Acting on peptide bonds (peptidases); Acting on acid anhydrides; Acting on peptide bonds (peptidases); Acting on acid anhydrides; Hydrolases; Nucleoside-triphosphate phosphatase	-	-	-	-	-
EMD64341	279.102	289.257	0	0	142.09	284.18	0	0	#NAME?	0.00638295	1	uncharacterized protein COCSADRAFT_89658	225	20	1.47039E-46	90.64	1	C:GO:0016021	C:integral component of membrane	-	-	-	-	-	-	-
EMD64479	89.1187	105.545	0	0	48.6659	97.3319	0	0	#NAME?	0.031418	1	uncharacterized protein COCSADRAFT_37061	1089	20	0	82.73	-	-	-	-	-	-	-	-	-	-
EMD64451	83.8384	79.4466	0	0	40.8212	81.6425	0	0	#NAME?	0.0427463	1	ARM repeat-containing protein	3327	20	0	94.75	8	C:GO:0005737; P:GO:0006607; F:GO:0008139; C:GO:0016021; F:GO:0031267; C:GO:0034399; F:GO:0061608; P:GO:2000220	C:cytoplasm; P:NLS-bearing protein import into nucleus; F:nuclear localization sequence binding; C:integral component of membrane; F:small GTPase binding; C:nuclear periphery; F:nuclear import signal receptor activity; P:regulation of pseudohyphal growth	-	-	-	-	-	K20221	Nucleocytoplasmic transport;
EMD64391	82.653	68.9561	0	0	37.9023	75.8045	0	0	#NAME?	0.0487042	1	high affinity copper transporter	576	20	1.3072E-119	92.74	4	F:GO:0005375; P:GO:0006878; C:GO:0016021; P:GO:0035434	F:copper ion transmembrane transporter activity; P:cellular copper ion homeostasis; C:integral component of membrane; P:copper ion transmembrane transport	EC:7	n/a	-	-	-	K14686	-
EMD64390	255.179	216.591	0	15.4568	121.807	235.885	7.72841	0.0327635	-4.93177	0.0419443	1	ferric reductase	2034	20	0	92.43	3	P:GO:0000041; F:GO:0000293; C:GO:0016021	P:transition metal ion transport; F:ferric-chelate reductase activity; C:integral component of membrane	EC:1.16; EC:1	Oxidizing metal ions; Oxidoreductases	-	-	-	-	-
EMD64249	126.727	126.27	0	0	63.2494	126.499	0	0	#NAME?	0.0201418	1	putative metabolite transport protein	1524	20	0	95.98	3	C:GO:0016021; F:GO:0022857; P:GO:0055085	C:integral component of membrane; F:transmembrane transporter activity; P:transmembrane transport	EC:7	n/a	-	-	-	-	-
EMD64229	74.5709	88.9137	0	0	40.8711	81.7423	0	0	#NAME?	0.0426583	1	hypothetical protein GGP41_006665	657	20	2.66103E-157	91.41	-	-	-	-	-	-	-	-	-	-
EMD64202	460.141	409.899	0	0	217.51	435.02	0	0	#NAME?	0.0044504	1	putative transcription factor bhlh protein	867	20	4.58138E-164	77.68	1	F:GO:0046983	F:protein dimerization activity	-	-	-	-	-	-	-
EMD64252	115.52	110.279	0	0	56.4497	112.899	0	0	#NAME?	0.0243477	1	putative ubiquitin fusion degradation protein	5589	20	0	93.1	3	P:GO:0006511; P:GO:0016567; F:GO:0061630	P:ubiquitin-dependent protein catabolic process; P:protein ubiquitination; F:ubiquitin protein ligase activity	EC:2	Transferases	-	-	-	K10590	Ubiquitin mediated proteolysis;
EMD64036	87.3945	76.2483	0	0	40.9107	81.8214	0	0	#NAME?	0.0425806	1	ribosomal protein L34e	345	20	4.28354E-63	98.13	4	F:GO:0003735; P:GO:0006412; C:GO:0022625; P:GO:0042254	F:structural constituent of ribosome; P:translation; C:cytosolic large ribosomal subunit; P:ribosome biogenesis	-	-	-	-	-	K02915	Ribosome;
EMD64267	82.222	81.7494	0	0	40.9928	81.9857	0	0	#NAME?	0.0424327	1	putative di- and tripeptidase	2769	20	0	94.94	4	C:GO:0005576; P:GO:0006508; P:GO:0006751; F:GO:0008233	C:extracellular region; P:proteolysis; P:glutathione catabolic process; F:peptidase activity	EC:3.4; EC:3	Acting on peptide bonds (peptidases); Hydrolases	-	-	-	-	-
EMD64460	91.1661	105.417	0	0	49.1458	98.2916	0	0	#NAME?	0.0308865	1	cytochrome p450	1623	20	0	90.92	5	F:GO:0004497; F:GO:0005506; C:GO:0016021; F:GO:0016705; F:GO:0020037	F:monooxygenase activity; F:iron ion binding; C:integral component of membrane; F:oxidoreductase activity, acting on paired donors, with incorporation or reduction of molecular oxygen; F:heme binding	EC:1; EC:1.14	Oxidoreductases; Acting on paired donors, with incorporation or reduction of molecular oxygen. The oxygen incorporated need not be derived from O(2)	-	-	-	-	-
EMD63458	97.9551	95.3104	0	0	48.3164	96.6327	0	0	#NAME?	0.031812	1	ATP binding protein	4260	20	0	91.75	3	F:GO:0004672; F:GO:0005524; P:GO:0006468	F:protein kinase activity; F:ATP binding; P:protein phosphorylation	EC:2.7.1; EC:2.7; EC:2	Transferring phosphorus-containing groups; Transferring phosphorus-containing groups; Transferases	-	-	-	-	-
EMD63525	462.512	441.37	16.6989	0	230.145	451.941	8.34947	0.0184747	-5.75831	0.021261	1	benzoate 4-monooxygenase cytochrome-like protein P450	1491	20	0	86.32	5	F:GO:0004497; F:GO:0005506; C:GO:0016021; F:GO:0016705; F:GO:0020037	F:monooxygenase activity; F:iron ion binding; C:integral component of membrane; F:oxidoreductase activity, acting on paired donors, with incorporation or reduction of molecular oxygen; F:heme binding	EC:1; EC:1.14	Oxidoreductases; Acting on paired donors, with incorporation or reduction of molecular oxygen. The oxygen incorporated need not be derived from O(2)	-	-	-	-	-
EMD63848	136.103	145.972	0	0	70.5187	141.037	0	0	#NAME?	0.016871	1	uncharacterized protein COCSADRAFT_37598	1215	12	0	72.46	-	-	-	-	-	-	-	-	-	-
EMD63454	169.509	185.631	0	7.72841	90.7171	177.57	3.86421	0.0217616	-5.52207	0.0331977	1	uncharacterized protein COCSADRAFT_37239	1905	20	0	85.61	-	-	-	-	-	-	-	-	-	-
EMD63612	307.874	308.703	0	0	154.144	308.289	0	0	#NAME?	0.00585918	1	Asp f 13-like protein	417	20	1.91921E-95	87.84	1	C:GO:0005576	C:extracellular region	-	-	-	-	-	-	-
EMD63786	88.5799	93.5193	0	0	45.5248	91.0496	0	0	#NAME?	0.0352966	1	AMID mitochondrial oxidoreductase	1257	20	0	89.99	1	F:GO:0016491	F:oxidoreductase activity	EC:1	Oxidoreductases	-	-	-	K22745	p53 signaling pathway;
EMD63625	479.323	450.965	0	0	232.572	465.144	0	0	#NAME?	0.00430307	1	DUF4336 domain containing protein	825	20	0	95.11	1	F:GO:0016740	F:transferase activity	EC:2	Transferases	-	-	-	-	-
EMD63611	286.43	329.301	0	0	153.933	307.865	0	0	#NAME?	0.00586755	1	Cupredoxin	621	20	9.23327E-98	89.07	3	F:GO:0005507; F:GO:0009055; P:GO:0022900	F:copper ion binding; F:electron transfer activity; P:electron transport chain	EC:1	Oxidoreductases	-	-	-	-	-
EMD63501	368.221	342.222	0	0	177.611	355.221	0	0	#NAME?	0.00513654	1	Peptidyl-prolyl cis-trans isomerase-like 4	501	20	2.82944E-91	92.97	1	F:GO:0016853	F:isomerase activity	EC:5	Isomerases	-	-	-	-	-
EMD63419	571.782	634.677	0	0	301.615	603.23	0	0	#NAME?	0.00408103	1	set domain	537	20	7.96281E-115	93.03	2	F:GO:0016301; P:GO:0016310	F:kinase activity; P:phosphorylation	EC:2.7; EC:2	Transferring phosphorus-containing groups; Transferases	-	-	-	-	-
EMD63411	100.003	91.8562	0	0	47.9647	95.9294	0	0	#NAME?	0.0322186	1	pt repeat family	2292	20	0	72.96	1	C:GO:0016020	C:membrane	-	-	-	-	-	-	-
EMD62961	115.305	100.044	0	0	53.8372	107.674	0	0	#NAME?	0.0263908	1	putative 4-hydroxy-2-oxoglutarate aldolase	1086	20	0	96.32	1	F:GO:0008840	F:4-hydroxy-tetrahydrodipicolinate synthase activity	EC:4.2.1; EC:4.2; EC:4; EC:4.3.3.7	Carbon-oxygen lyases; Carbon-oxygen lyases; Lyases; 4-hydroxy-tetrahydrodipicolinate synthase	-	-	-	K18123	Metabolic pathways; Glyoxylate and dicarboxylate metabolism; Arginine and proline metabolism;
EMD63100	87.9333	103.498	0	0	47.8579	95.7157	0	0	#NAME?	0.032347	1	uncharacterized protein COCSADRAFT_37970	1893	20	0	74.77	-	-	-	-	-	-	-	-	-	-
EMD63125	533.85	574.165	0	0	277.004	554.007	0	0	#NAME?	0.00409582	1	Calcofluor white hypersensitive	1401	20	0	89.94	-	-	-	-	-	-	-	-	-	-
EMD63022	1361.24	1683.48	25.0484	23.1852	773.238	1522.36	24.1168	0.0158418	-5.98012	0.0481086	1	cdp-alcohol phosphatidyltransferase	642	20	5.20532E-136	87.6	2	C:GO:0016021; F:GO:0016740	C:integral component of membrane; F:transferase activity	EC:2	Transferases	-	-	-	-	-
EMD63071	266.817	245.76	0	0	128.144	256.289	0	0	#NAME?	0.00718315	1	aspartyl-trna synthetase	3132	20	0	95.84	6	F:GO:0004815; F:GO:0005524; C:GO:0005737; C:GO:0005886; P:GO:0006422; C:GO:0016021	F:aspartate-tRNA ligase activity; F:ATP binding; C:cytoplasm; C:plasma membrane; P:aspartyl-tRNA aminoacylation; C:integral component of membrane	EC:6.1; EC:6.1.1.12; EC:6.1.1; EC:6	Forming carbon-oxygen bonds; Aspartate--tRNA ligase; Forming carbon-oxygen bonds; Ligases	-	-	-	K24278	Aminoacyl-tRNA biosynthesis;
EMD63308	1032.35	1168.29	0	15.4568	554.025	1100.32	7.72841	0.00702378	-7.15354	0.0186243	1	zinc finger transcription factor	2292	20	0	89.79	-	-	-	-	-	-	-	-	-	-
EMD63039	75.5407	78.5511	0	0	38.523	77.0459	0	0	#NAME?	0.0473366	1	MFS general substrate transporter	2016	20	0	96.52	3	C:GO:0016021; F:GO:0022857; P:GO:0055085	C:integral component of membrane; F:transmembrane transporter activity; P:transmembrane transport	EC:7	n/a	-	-	-	-	-
EMD63212	773.404	792.931	0	0	391.584	783.167	0	0	#NAME?	0.00430289	1	uncharacterized protein COCSADRAFT_38083	2676	20	0	93.99	5	F:GO:0003723; C:GO:0005681; P:GO:0006397; F:GO:0008168; P:GO:0008380	F:RNA binding; C:spliceosomal complex; P:mRNA processing; F:methyltransferase activity; P:RNA splicing	EC:2.1; EC:2; EC:2.1.1	Transferring one-carbon groups; Transferases; Transferring one-carbon groups	-	-	-	-	-
EMD62676	250.006	282.733	0	0	133.185	266.37	0	0	#NAME?	0.0068651	1	HSP20-like chaperone	987	20	6.14502E-175	81.13	-	-	-	-	-	-	-	-	-	-
EMD62424	108.192	108.743	0	0	54.234	108.468	0	0	#NAME?	0.0260631	1	hypothetical protein GGP41_002048	921	20	0	73.8	1	C:GO:0016021	C:integral component of membrane	-	-	-	-	-	-	-
EMD62583	104.205	111.174	0	0	53.8448	107.69	0	0	#NAME?	0.0263864	1	l-2-hydroxyglutarate dehydrogenase	948	20	7.05489E-166	90.2	-	-	-	-	-	-	-	-	-	-
EMD62743	321.56	296.422	0	0	154.495	308.991	0	0	#NAME?	0.00584563	1	victoriocin	552	20	8.98659E-100	64.4	-	-	-	-	-	-	-	-	-	-
EMD62506	73.3855	76.76	0	0	37.5364	75.0728	0	0	#NAME?	0.0495461	1	uncharacterized protein COCSADRAFT_38427	462	5	1.84472E-12	97.2	-	-	-	-	-	-	-	-	-	-
EMD62508	80.1745	75.9924	0	0	39.0417	78.0835	0	0	#NAME?	0.046234	1	putative sterol desaturase	942	20	0	93	5	F:GO:0005506; P:GO:0008610; C:GO:0016021; F:GO:0016491; P:GO:0044255	F:iron ion binding; P:lipid biosynthetic process; C:integral component of membrane; F:oxidoreductase activity; P:cellular lipid metabolic process	EC:1	Oxidoreductases	-	-	-	K00227	Metabolic pathways; Biosynthesis of secondary metabolites;
EMD62712	108.085	117.571	0	0	56.4139	112.828	0	0	#NAME?	0.024375	1	uncharacterized protein COCSADRAFT_223653	1269	20	0	82.66	-	-	-	-	-	-	-	-	-	-
EMD62410	91.1661	89.5534	0	0	45.1799	90.3598	0	0	#NAME?	0.0357689	1	cysteine proteinase	2715	20	0	89.4	3	F:GO:0003677; F:GO:0004198; P:GO:0006508	F:DNA binding; F:calcium-dependent cysteine-type endopeptidase activity; P:proteolysis	EC:3.4.22; EC:3.4; EC:3	Acting on peptide bonds (peptidases); Acting on peptide bonds (peptidases); Hydrolases	-	-	-	-	-
EMD62160	254.101	230.664	0	0	121.191	242.383	0	0	#NAME?	0.00768915	1	Efflux pump	1731	20	0	93.95	3	C:GO:0016021; F:GO:0022857; P:GO:0055085	C:integral component of membrane; F:transmembrane transporter activity; P:transmembrane transport	EC:7	n/a	-	-	-	-	-
EMD62201	257.981	211.73	0	0	117.428	234.855	0	0	#NAME?	0.00800085	1	uncharacterized protein COCSADRAFT_38984	726	20	2.05677E-170	89.46	-	-	-	-	-	-	-	-	-	-
EMD62060	253.132	270.451	8.34947	0	132.983	261.791	4.17474	0.0159468	-5.97059	0.0196023	1	brassinin detoxification factor 1	2394	20	0	86.69	5	F:GO:0000981; F:GO:0003677; C:GO:0005634; P:GO:0006357; F:GO:0008270	F:DNA-binding transcription factor activity, RNA polymerase II-specific; F:DNA binding; C:nucleus; P:regulation of transcription by RNA polymerase II; F:zinc ion binding	-	-	-	-	-	-	-
EMD62056	130.499	140.471	0	0	67.7425	135.485	0	0	#NAME?	0.018003	1	ornithine decarboxylase	3078	20	0	74.57	3	F:GO:0003824; P:GO:0006596; P:GO:1901564	F:catalytic activity; P:polyamine biosynthetic process; P:organonitrogen compound metabolic process	-	-	-	-	-	-	-
EMD61871	240.308	242.945	16.6989	0	124.988	241.627	8.34947	0.0345553	-4.85495	0.0405302	1	30 kDa heat shock protein	588	20	1.13184E-141	96.35	-	-	-	-	-	-	-	-	K13993	-
EMD62181	99.8948	85.2036	0	0	46.2746	92.5492	0	0	#NAME?	0.0342992	1	serine/threonine-protein kinase/endoribonuclease IRE1 precursor	3618	20	0	92.19	10	F:GO:0004521; F:GO:0004674; F:GO:0004712; F:GO:0005524; P:GO:0006397; P:GO:0006468; C:GO:0016021; P:GO:0030968; P:GO:0090502; F:GO:0106310	F:endoribonuclease activity; F:protein serine/threonine kinase activity; F:protein serine/threonine/tyrosine kinase activity; F:ATP binding; P:mRNA processing; P:protein phosphorylation; C:integral component of membrane; P:endoplasmic reticulum unfolded protein response; P:RNA phosphodiester bond hydrolysis, endonucleolytic; F:protein serine kinase activity	EC:2.7.1; EC:2.7.12.1; EC:3.1; EC:2.7; EC:2; EC:3	Transferring phosphorus-containing groups; Dual-specificity kinase; Acting on ester bonds; Transferring phosphorus-containing groups; Transferases; Hydrolases	-	-	-	K08852	Apoptosis; Amyotrophic lateral sclerosis; Lipid and atherosclerosis;
EMD61846	77.4805	86.483	0	0	40.9909	81.9817	0	0	#NAME?	0.0424383	1	7alpha-cephem-methoxylase P8 chain	888	20	0	95.15	1	F:GO:0016491	F:oxidoreductase activity	EC:1	Oxidoreductases	-	-	-	-	-
EMD61924	150.435	146.995	0	0	74.3576	148.715	0	0	#NAME?	0.0155004	1	fungal zn binuclear cluster domain containing protein	2715	20	0	88.09	-	-	-	-	-	-	-	-	-	-
EMD61837	70.7992	79.4466	0	0	37.5615	75.1229	0	0	#NAME?	0.0494894	1	hypothetical protein COCSADRAFT_224821	210	5	9.7275E-43	88.48	-	-	-	-	-	-	-	-	-	-
EMD61303	763.597	892.463	0	0	414.015	828.03	0	0	#NAME?	0.00439608	1	uncharacterized protein COCSADRAFT_39039	732	20	3.75479E-122	70.68	-	-	-	-	-	-	-	-	-	-
EMD61733	71.0148	82.7729	0	0	38.4469	76.8938	0	0	#NAME?	0.0475035	1	PRP38-assoc multi-domain protein	1806	20	4.44008E-113	90.36	-	-	-	-	-	-	-	-	-	-
EMD61207	89.3342	93.0076	0	0	45.5854	91.1709	0	0	#NAME?	0.0352142	1	Delta(24)-sterol C-methyltransferase	1140	20	0	97.08	3	F:GO:0003838; P:GO:0016126; P:GO:0032259	F:sterol 24-C-methyltransferase activity; P:sterol biosynthetic process; P:methylation	EC:2.1; EC:2; EC:2.1.1.41; EC:2.1.1	Transferring one-carbon groups; Transferases; Sterol 24-C-methyltransferase; Transferring one-carbon groups	-	-	-	K00559	Metabolic pathways; Biosynthesis of secondary metabolites;
EMD61266	820.926	831.439	0	0	413.091	826.183	0	0	#NAME?	0.00439171	1	NRDE protein-domain-containing protein	957	20	0	94.06	-	-	-	-	-	-	-	-	-	-
EMD61242	107.223	114.117	0	0	55.3348	110.67	0	0	#NAME?	0.0251865	1	putative RNA interference and gene silencing protein	3117	20	0	86.49	1	F:GO:0003676	F:nucleic acid binding	-	-	-	-	-	K11593	Axon regeneration;
EMD61056	459.71	428.833	0	15.4568	226	444.271	7.72841	0.0173957	-5.84513	0.021544	1	C-4 methylsterol oxidase	879	20	0	96.74	6	F:GO:0000254; F:GO:0005506; C:GO:0005789; C:GO:0005886; P:GO:0006696; C:GO:0016021	F:C-4 methylsterol oxidase activity; F:iron ion binding; C:endoplasmic reticulum membrane; C:plasma membrane; P:ergosterol biosynthetic process; C:integral component of membrane	EC:1; EC:1.14; EC:1.14.18; EC:1.14.18.9	Oxidoreductases; Acting on paired donors, with incorporation or reduction of molecular oxygen. The oxygen incorporated need not be derived from O(2); Acting on paired donors, with incorporation or reduction of molecular oxygen. The oxygen incorporated need not be derived from O(2); Methylsterol monooxygenase	-	-	-	K07750	Metabolic pathways; Biosynthesis of secondary metabolites;
EMD60317	99.356	112.07	0	0	52.8564	105.713	0	0	#NAME?	0.0272379	1	Histone H4,2	1113	20	0	83.56	1	C:GO:0016021	C:integral component of membrane	-	-	-	-	-	-	-
EMD60302	993.776	1091.91	16.6989	0	525.596	1042.84	8.34947	0.00800645	-6.96462	0.0184706	1	Hexose transporter HXT13	1713	20	0	95.18	4	P:GO:0008643; C:GO:0016021; F:GO:0022857; P:GO:0055085	P:carbohydrate transport; C:integral component of membrane; F:transmembrane transporter activity; P:transmembrane transport	EC:7	n/a	-	-	-	K08139	-
EMD60644	110.132	105.801	0	0	53.9833	107.967	0	0	#NAME?	0.0262698	1	multicopper oxidase	2208	20	0	90.83	2	F:GO:0005507; F:GO:0016491	F:copper ion binding; F:oxidoreductase activity	EC:1	Oxidoreductases	-	-	-	-	-
EMD60580	83.8384	77.0159	0	0	40.2136	80.4271	0	0	#NAME?	0.043889	1	glycosyltransferase family 8 protein	1656	20	0	79.85	3	F:GO:0016757; F:GO:0016787; P:GO:0071704	F:glycosyltransferase activity; F:hydrolase activity; P:organic substance metabolic process	EC:2.4; EC:2; EC:3	Glycosyltransferases; Transferases; Hydrolases	-	-	-	K00750	Metabolic pathways; Biosynthesis of secondary metabolites; Starch and sucrose metabolism;
EMD60725	190.845	259.193	0	0	112.51	225.019	0	0	#NAME?	0.00845748	1	putative ricin b lectin protein	510	20	1.31269E-121	95.37	4	P:GO:0006508; F:GO:0008237; F:GO:0016874; F:GO:0030246	P:proteolysis; F:metallopeptidase activity; F:ligase activity; F:carbohydrate binding	EC:3.4; EC:3; EC:6	Acting on peptide bonds (peptidases); Hydrolases; Ligases	-	-	-	-	-
EMD60680	247.636	262.519	0	0	127.539	255.077	0	0	#NAME?	0.00722428	1	Pmp3 multi-domain protein	1209	20	0	92.88	2	P:GO:0001172; F:GO:0003968	P:RNA-templated transcription; F:RNA-directed 5'-3' RNA polymerase activity	EC:2.7; EC:2; EC:2.7.7.48; EC:2.7.7	Transferring phosphorus-containing groups; Transferases; RNA-directed RNA polymerase; Transferring phosphorus-containing groups	-	-	-	-	-
EMD60343	120.262	104.777	0	0	56.2598	112.52	0	0	#NAME?	0.0244861	1	transmembrane BAX inhibitor motif-containing protein 4	837	20	0	93.79	7	C:GO:0000324; C:GO:0005739; C:GO:0005783; P:GO:0006915; C:GO:0016021; P:GO:0019722; P:GO:0030968	C:fungal-type vacuole; C:mitochondrion; C:endoplasmic reticulum; P:apoptotic process; C:integral component of membrane; P:calcium-mediated signaling; P:endoplasmic reticulum unfolded protein response	-	-	-	-	-	-	-
EMD60084	229.855	205.461	0	0	108.829	217.658	0	0	#NAME?	0.00883772	1	Mid2 domain containing protein	948	20	4.62819E-59	86.75	1	C:GO:0016021	C:integral component of membrane	-	-	-	-	-	-	-
EMD60043	374.363	518.514	0	30.9137	230.948	446.439	15.4568	0.0346225	-4.85215	0.0462146	1	gpi anchored serine-threonine rich protein	510	20	7.26489E-48	94.12	-	-	-	-	-	-	-	-	-	-
EMD59859	133.732	142.39	0	0	69.0304	138.061	0	0	#NAME?	0.0174616	1	2,3-diketo-5-methylthio-1-phosphopentane phosphatase	663	20	5.08882E-161	90.52	4	F:GO:0000287; P:GO:0016311; P:GO:0019509; F:GO:0043874	F:magnesium ion binding; P:dephosphorylation; P:L-methionine salvage from methylthioadenosine; F:acireductone synthase activity	EC:3.1; EC:3; EC:3.1.3.77; EC:3.1.3	Acting on ester bonds; Hydrolases; Acireductone synthase; Acting on ester bonds	-	-	-	K09880	Metabolic pathways; Cysteine and methionine metabolism;
EMD59947	88.2566	95.1824	0	0	45.8598	91.7195	0	0	#NAME?	0.0348468	1	Acetyl-CoA synthetase-like protein	759	20	2.75751E-147	75.02	-	-	-	-	-	-	-	-	-	-
EMD60179	115.628	112.581	0	0	57.0523	114.105	0	0	#NAME?	0.0239149	1	CopZ Copper chaperone	237	20	3.50809E-48	97.12	3	F:GO:0003743; P:GO:0006413; F:GO:0046872	F:translation initiation factor activity; P:translational initiation; F:metal ion binding	-	-	-	-	-	K07213	-
EMD60216	133.301	156.079	0	0	72.3449	144.69	0	0	#NAME?	0.0161938	1	uncharacterized protein COCSADRAFT_40657	591	5	6.84075E-135	66.21	-	-	-	-	-	-	-	-	-	-
EMD60007	123.818	134.33	0	0	64.537	129.074	0	0	#NAME?	0.019486	1	glycosylphosphatidylinositol anchored cell wall protein	552	20	2.32295E-66	72.85	-	-	-	-	-	-	-	-	-	-
EMD59828	117.783	116.164	0	0	58.4867	116.973	0	0	#NAME?	0.0229368	1	udp-glucose 4-epimerase	1410	20	0	93.44	3	F:GO:0003974; F:GO:0003978; P:GO:0006012	F:UDP-N-acetylglucosamine 4-epimerase activity; F:UDP-glucose 4-epimerase activity; P:galactose metabolic process	EC:5.1.3.7; EC:5.1; EC:5; EC:5.1.3; EC:5.1.3.2	UDP-N-acetylglucosamine 4-epimerase; Racemases and epimerases; Isomerases; Racemases and epimerases; UDP-glucose 4-epimerase	-	-	-	K01784	Metabolic pathways; Biosynthesis of nucleotide sugars; Galactose metabolism; Amino sugar and nucleotide sugar metabolism; O-Antigen nucleotide sugar biosynthesis;
EMD59831	256.688	256.123	16.6989	0	132.377	256.405	8.34947	0.0325636	-4.9406	0.0376066	1	glycosyltransferase family 4 protein	9186	20	0	89.66	2	C:GO:0016021; F:GO:0016740	C:integral component of membrane; F:transferase activity	EC:2	Transferases	-	-	-	-	-
EMD59805	281.257	279.151	0	0	140.102	280.204	0	0	#NAME?	0.00648254	1	ATPase inhibitor	315	20	5.60208E-67	94.57	3	C:GO:0005739; P:GO:0032780; F:GO:0042030	C:mitochondrion; P:negative regulation of ATP-dependent activity; F:ATPase inhibitor activity	-	-	-	-	-	-	-
EMD59560	78.8813	78.2952	0	0	39.2941	78.5883	0	0	#NAME?	0.0457135	1	glycoside hydrolase family 10 protein	1506	20	0	87.03	4	C:GO:0005576; F:GO:0030248; F:GO:0031176; P:GO:0045493	C:extracellular region; F:cellulose binding; F:endo-1,4-beta-xylanase activity; P:xylan catabolic process	EC:3.2; EC:3.2.1.8; EC:3; EC:3.2.1	Glycosylases; Endo-1,4-beta-xylanase; Hydrolases; Glycosylases	-	-	-	-	-
EMD59658	78.127	77.6556	0	0	38.9456	77.8913	0	0	#NAME?	0.0464357	1	putative histidine kinase HHK13p	4566	20	0	85.35	3	F:GO:0000155; P:GO:0000160; P:GO:0018106	F:phosphorelay sensor kinase activity; P:phosphorelay signal transduction system; P:peptidyl-histidine phosphorylation	EC:2.7.1; EC:2.7; EC:2.7.3; EC:2; EC:2.7.13.3	Transferring phosphorus-containing groups; Transferring phosphorus-containing groups; Transferring phosphorus-containing groups; Transferases; Histidine kinase	-	-	-	-	-
EMD59748	685.686	752.504	0	0	359.547	719.095	0	0	#NAME?	0.00419766	1	uncharacterized membrane protein YFL067W-like	1899	19	1.29068E-26	83.85	2	C:GO:0016020; C:GO:0016021	C:membrane; C:integral component of membrane	-	-	-	-	-	-	-
EMD59728	77.1572	72.4103	0	0	37.3919	74.7837	0	0	#NAME?	0.0498811	1	DUF500-domain-containing protein	1893	20	0	91.4	-	-	-	-	-	-	-	-	-	-
EMD59656	736.334	765.553	0	0	375.472	750.943	0	0	#NAME?	0.00424706	1	cytochrome P450 monooxygenase-like protein	1539	20	0	79.19	5	F:GO:0004497; F:GO:0005506; C:GO:0016021; F:GO:0016705; F:GO:0020037	F:monooxygenase activity; F:iron ion binding; C:integral component of membrane; F:oxidoreductase activity, acting on paired donors, with incorporation or reduction of molecular oxygen; F:heme binding	EC:1; EC:1.14	Oxidoreductases; Acting on paired donors, with incorporation or reduction of molecular oxygen. The oxygen incorporated need not be derived from O(2)	-	-	-	-	-
EMD59360	432.878	389.045	0	0	205.481	410.961	0	0	#NAME?	0.00460569	1	serine-rich protein	2166	20	0	84.65	1	C:GO:0016021	C:integral component of membrane	-	-	-	-	-	-	-
EMD59250	106.792	93.9031	0	0	50.1737	100.347	0	0	#NAME?	0.0297945	1	WD repeat protein	1137	20	0	92.64	-	-	-	-	-	-	-	-	-	-
EMD59238	631.697	562.011	0	0	298.427	596.854	0	0	#NAME?	0.0040799	1	g-protein beta wd-40 repeat-containing protein	1914	20	0	72.9	-	-	-	-	-	-	-	-	-	-
EMD59432	117.891	89.0416	0	0	51.7332	103.466	0	0	#NAME?	0.0282586	1	delta 8-(E)-sphingolipid desaturase	1704	20	0	95.77	4	P:GO:0006665; F:GO:0008812; C:GO:0016021; F:GO:0050660	P:sphingolipid metabolic process; F:choline dehydrogenase activity; C:integral component of membrane; F:flavin adenine dinucleotide binding	EC:1.1; EC:1; EC:1.1.99.1	Acting on the CH-OH group of donors; Oxidoreductases; Choline dehydrogenase	-	-	-	-	-
EMD59316	82.222	77.5276	0	0	39.9374	79.8748	0	0	#NAME?	0.0444249	1	uba ts-n domain containing protein	4284	20	0	94.11	6	F:GO:0003779; F:GO:0005509; C:GO:0005886; P:GO:0006897; C:GO:0010008; C:GO:0030479	F:actin binding; F:calcium ion binding; C:plasma membrane; P:endocytosis; C:endosome membrane; C:actin cortical patch	-	-	-	-	-	K12472	Endocytosis;
EMD59067	140.305	133.562	0	7.72841	70.3991	136.934	3.86421	0.0282195	-5.14716	0.0492488	1	uncharacterized protein COCSADRAFT_263112	1266	20	0	78.65	1	C:GO:0016021	C:integral component of membrane	-	-	-	-	-	-	-
EMD58903	256.364	254.715	16.6989	0	131.945	255.54	8.34947	0.0326739	-4.93572	0.0377649	1	lipase/serine esteras-like protein	1335	20	0	90.66	2	C:GO:0016021; P:GO:0016042	C:integral component of membrane; P:lipid catabolic process	-	-	-	-	-	-	-
EMD58889	227.377	233.606	16.6989	0	119.42	230.491	8.34947	0.0362247	-4.78688	0.0430818	1	glycoside hydrolase family 72 protein	1365	20	0	90.02	5	C:GO:0005886; C:GO:0016021; F:GO:0016740; F:GO:0016787; C:GO:0031225	C:plasma membrane; C:integral component of membrane; F:transferase activity; F:hydrolase activity; C:anchored component of membrane	EC:2; EC:3	Transferases; Hydrolases	-	-	-	-	-
EMD58801	223.066	238.084	0	15.4568	119.152	230.575	7.72841	0.033518	-4.89892	0.0432133	1	DNAJ domain containing protein	1788	20	0	78.92	-	-	-	-	-	-	-	-	-	-
EMD58872	131.792	136.249	0	0	67.0103	134.021	0	0	#NAME?	0.0183237	1	C6 zinc finger domain containing protein	2292	20	0	92.77	7	F:GO:0000981; F:GO:0003677; F:GO:0004674; C:GO:0005634; P:GO:0006357; P:GO:0006468; F:GO:0008270	F:DNA-binding transcription factor activity, RNA polymerase II-specific; F:DNA binding; F:protein serine/threonine kinase activity; C:nucleus; P:regulation of transcription by RNA polymerase II; P:protein phosphorylation; F:zinc ion binding	EC:2.7.1; EC:2.7; EC:2	Transferring phosphorus-containing groups; Transferring phosphorus-containing groups; Transferases	-	-	-	-	-
EMD58991	96.3387	104.394	0	0	50.1831	100.366	0	0	#NAME?	0.0297871	1	sterol regulatory element binding protein sre1 protein	3150	20	0	89.97	3	P:GO:0032933; P:GO:0045944; F:GO:0046983	P:SREBP signaling pathway; P:positive regulation of transcription by RNA polymerase II; F:protein dimerization activity	-	-	-	-	-	-	-
EMD59112	155.931	143.541	0	0	74.868	149.736	0	0	#NAME?	0.015333	1	alpha-L-rhamnosidase A	2712	20	0	92.54	2	P:GO:0005975; F:GO:0030596	P:carbohydrate metabolic process; F:alpha-L-rhamnosidase activity	EC:3.2; EC:3.2.1.40; EC:3; EC:3.2.1	Glycosylases; Alpha-L-rhamnosidase; Hydrolases; Glycosylases	-	-	-	-	-
EMD58962	96.8775	91.6003	0	0	47.1194	94.2389	0	0	#NAME?	0.0332334	1	glutathione peroxidase gpx1	507	20	2.12942E-119	97.28	7	F:GO:0004602; C:GO:0005739; C:GO:0005829; F:GO:0008379; P:GO:0042744; P:GO:0045454; P:GO:0061692	F:glutathione peroxidase activity; C:mitochondrion; C:cytosol; F:thioredoxin peroxidase activity; P:hydrogen peroxide catabolic process; P:cell redox homeostasis; P:cellular detoxification of hydrogen peroxide	EC:1.11; EC:1; EC:1.11.1.24; EC:1.11.1; EC:1.11.1.9	Acting on a peroxide as acceptor; Oxidoreductases; n/a; Acting on a peroxide as acceptor; Glutathione peroxidase	-	-	-	-	-
EMD59012	174.681	151.857	0	0	81.6345	163.269	0	0	#NAME?	0.0133947	1	uncharacterized protein COCSADRAFT_204080	426	20	4.98128E-98	65.7	-	-	-	-	-	-	-	-	-	-
EMD58862	116.059	115.012	0	0	57.7678	115.536	0	0	#NAME?	0.0234182	1	indoleamine 2,3-dioxygenase alpha type	1473	20	0	95.81	5	P:GO:0019441; F:GO:0020037; F:GO:0033754; P:GO:0034354; F:GO:0046872	P:tryptophan catabolic process to kynurenine; F:heme binding; F:indoleamine 2,3-dioxygenase activity; P:'de novo' NAD biosynthetic process from tryptophan; F:metal ion binding	EC:1.13.11; EC:1.13; EC:1.13.11.52; EC:1	Acting on single donors with incorporation of molecular oxygen (oxygenases). The oxygen incorporated need not be derived from O(2); Acting on single donors with incorporation of molecular oxygen (oxygenases). The oxygen incorporated need not be derived from O(2); Indoleamine 2,3-dioxygenase; Oxidoreductases	-	-	-	K00463	Metabolic pathways; Biosynthesis of cofactors; Tryptophan metabolism;
EMD59047	596.459	628.537	0	30.9137	313.977	612.498	15.4568	0.0252357	-5.30839	0.0380398	1	gtp-binding protein 1	3441	20	0	93.94	5	F:GO:0003924; F:GO:0005525; P:GO:0019441; F:GO:0020037; F:GO:0046872	F:GTPase activity; F:GTP binding; P:tryptophan catabolic process to kynurenine; F:heme binding; F:metal ion binding	EC:3.6.1; EC:3.6; EC:3; EC:3.6.1.15	Acting on acid anhydrides; Acting on acid anhydrides; Hydrolases; Nucleoside-triphosphate phosphatase	-	-	-	-	-
EMD58563	1095.07	1262.45	0	0	589.379	1178.76	0	0	#NAME?	0.0052185	1	inositolphosphorylceramide-B C-26 hydroxylase	1179	20	0	94.78	12	F:GO:0003723; F:GO:0005506; C:GO:0005634; C:GO:0005789; P:GO:0006397; P:GO:0006633; P:GO:0006673; F:GO:0008270; C:GO:0016021; F:GO:0020037; P:GO:0046513; F:GO:0080132	F:RNA binding; F:iron ion binding; C:nucleus; C:endoplasmic reticulum membrane; P:mRNA processing; P:fatty acid biosynthetic process; P:inositol phosphoceramide metabolic process; F:zinc ion binding; C:integral component of membrane; F:heme binding; P:ceramide biosynthetic process; F:fatty acid alpha-hydroxylase activity	EC:1	Oxidoreductases	-	-	-	-	-
EMD58731	77.5882	86.9947	0	0	41.1457	82.2915	0	0	#NAME?	0.0421577	1	predicted protein	411	20	4.9146E-35	89.77	-	-	-	-	-	-	-	-	-	-
EMD58636	370.591	368.448	0	0	184.76	369.52	0	0	#NAME?	0.00497313	1	uncharacterized protein COCSADRAFT_41750	762	20	1.02457E-112	72.33	-	-	-	-	-	-	-	-	-	-
EMD58720	325.547	336.081	0	0	165.407	330.814	0	0	#NAME?	0.00547186	1	Gag/polymerase/env polyprotein	294	20	6.85859E-66	86.15	4	F:GO:0003723; C:GO:0005634; P:GO:0006338; P:GO:0015074	F:RNA binding; C:nucleus; P:chromatin remodeling; P:DNA integration	-	-	-	-	-	-	-
EMD58742	90.5196	83.0288	0	0	43.3871	86.7742	0	0	#NAME?	0.038401	1	predicted protein	1080	20	0	79.21	-	-	-	-	-	-	-	-	-	-
EMD58746	460.033	457.234	0	0	229.317	458.634	0	0	#NAME?	0.004331	1	Ribokinase-like protein	1047	20	0	97.35	5	F:GO:0004001; P:GO:0006144; P:GO:0006166; P:GO:0016310; P:GO:0044209	F:adenosine kinase activity; P:purine nucleobase metabolic process; P:purine ribonucleoside salvage; P:phosphorylation; P:AMP salvage	EC:2.7.1; EC:2.7; EC:2; EC:2.7.1.20	Transferring phosphorus-containing groups; Transferring phosphorus-containing groups; Transferases; Adenosine kinase	-	-	-	K00856	Metabolic pathways; Nucleotide metabolism; Purine metabolism;
EMD58728	66.0577	85.0757	0	0	37.7834	75.5667	0	0	#NAME?	0.0489822	1	uncharacterized protein COCSADRAFT_154445	1677	20	0	90.84	-	-	-	-	-	-	-	-	-	-
EMD58749	89.3342	83.7964	0	0	43.2826	86.5653	0	0	#NAME?	0.0385643	1	SPRY domain-containing protein	1584	20	0	92.24	3	C:GO:0005774; C:GO:0010008; C:GO:0016021	C:vacuolar membrane; C:endosome membrane; C:integral component of membrane	-	-	-	-	-	-	-
EMD58494	451.628	428.705	33.3979	0	228.433	440.166	16.6989	0.0379378	-4.72022	0.0466442	1	alpha beta-hydrolase	540	20	4.63224E-68	81.69	2	P:GO:0006569; F:GO:0016787	P:tryptophan catabolic process; F:hydrolase activity	EC:3	Hydrolases	-	-	-	-	-
EMD58335	941.835	985.855	0	0	481.922	963.845	0	0	#NAME?	0.00472453	1	BNR repeat domain-containing protein	1254	20	0	72.69	-	-	-	-	-	-	-	-	-	-
EMD58355	366.389	411.178	0	0	194.392	388.783	0	0	#NAME?	0.00478476	1	Zinc knuckle	165	15	3.67936E-30	89.83	-	-	-	-	-	-	-	-	-	-
EMD58228	116.49	105.161	0	0	55.4128	110.826	0	0	#NAME?	0.0251247	1	WD40-repeat-containing domain protein	4500	20	0	77.49	2	C:GO:0016020; C:GO:0031410	C:membrane; C:cytoplasmic vesicle	-	-	-	-	-	-	-
EMD58146	162.827	160.301	0	0	80.782	161.564	0	0	#NAME?	0.0136139	1	uncharacterized protein COCSADRAFT_42094	1194	20	0	82.95	2	F:GO:0003676; F:GO:0008270	F:nucleic acid binding; F:zinc ion binding	-	-	-	-	-	-	-
EMD58077	1103.8	1114.81	16.6989	23.1852	564.624	1109.31	19.9421	0.0179771	-5.7977	0.0430135	1	Zinc knuckle	468	20	9.92245E-110	77.07	2	F:GO:0003676; F:GO:0008270	F:nucleic acid binding; F:zinc ion binding	-	-	-	-	-	-	-
EMD58078	576.631	555.103	0	15.4568	286.798	565.867	7.72841	0.0136576	-6.19415	0.0188622	1	Zinc knuckle	390	19	1.52994E-87	72.54	2	F:GO:0003676; F:GO:0008270	F:nucleic acid binding; F:zinc ion binding	-	-	-	-	-	-	-
EMD58070	278.348	319.066	0	7.72841	151.285	298.707	3.86421	0.0129365	-6.27241	0.0168413	1	retropepsin-like domain-containing protein	324	20	3.26868E-71	86.72	-	-	-	-	-	-	-	-	-	-

## Sheet: Commonly expressed genes
Combination	total	elements
BS-RI vs BS-SI	97	EMD66111
		EMD66956
		EMD68605
		EMD58862
		EMD64341
		EMD68097
		EMD66829
		EMD63308
		EMD62583
		EMD58903
		EMD59831
		EMD63848
		EMD66954
		EMD67872
		EMD64665
		EMD60084
		EMD61924
		EMD69144
		EMD64390
		EMD66015
		EMD63212
		EMD65754
		EMD58078
		EMD64249
		EMD59859
		EMD58355
		EMD70145
		EMD68063
		EMD60043
		EMD64972
		EMD58636
		EMD68142
		EMD60179
		EMD61266
		EMD68022
		EMD58494
		EMD63525
		EMD59272
		EMD62424
		EMD60725
		EMD64202
		EMD60343
		EMD60007
		EMD59828
		EMD68979
		EMD69143
		EMD69264
		EMD65260
		EMD58563
		EMD58070
		EMD58720
		EMD59656
		EMD59047
		EMD61303
		EMD70119
		EMD65353
		EMD63611
		EMD68406
		EMD65071
		EMD65374
		EMD63419
		EMD63625
		EMD68321
		EMD62743
		EMD68918
		EMD58801
		EMD69701
		EMD66258
		EMD67510
		EMD59067
		EMD65848
		EMD60302
		EMD59238
		EMD60644
		EMD65717
		EMD67175
		EMD66098
		EMD67641
		EMD68102
		EMD63022
		EMD59012
		EMD63125
		EMD62056
		EMD62712
		EMD63454
		EMD63501
		EMD69199
		EMD58228
		EMD64891
		EMD60216
		EMD66110
		EMD66672
		EMD69284
		EMD64890
		EMD63612
		EMD62676
		EMD66509

## Sheet: Exclusively Resistant
Combination	total	elements
BS-RI	31	EMD61641
		EMD58200
		EMD69150
		EMD66705
		EMD67136
		EMD58860
		EMD58201
		EMD65354
		EMD64037
		EMD67117
		EMD60497
		EMD61525
		EMD63040
		EMD61245
		EMD59830
		EMD65840
		EMD63574
		EMD58945
		EMD66541
		EMD66320
		EMD62119
		EMD61943
		EMD65481
		EMD66754
		EMD60677
		EMD63007
		EMD62637
		EMD60673
		EMD64159
		EMD70004
		EMD67875

## Sheet: Exclusively susceptible
Combination	total	elements
BS-SI	108	EMD59316
		EMD63039
		EMD67971
		EMD59658
		EMD59947
		EMD62961
		EMD64036
		EMD59112
		EMD58962
		EMD68765
		EMD67686
		EMD58749
		EMD69983
		EMD63100
		EMD67201
		EMD69902
		EMD64267
		EMD69113
		EMD67576
		EMD68702
		EMD65087
		EMD59748
		EMD69278
		EMD63411
		EMD62759
		EMD59360
		EMD63071
		EMD68711
		EMD60580
		EMD62410
		EMD67977
		EMD58077
		EMD61242
		EMD58206
		EMD61846
		EMD68545
		EMD65867
		EMD69723
		EMD62508
		EMD59432
		EMD65257
		EMD67444
		EMD62506
		EMD67408
		EMD64252
		EMD58872
		EMD62060
		EMD68450
		EMD66152
		EMD67769
		EMD69254
		EMD66725
		EMD66219
		EMD58889
		EMD64460
		EMD64605
		EMD60680
		EMD61837
		EMD68134
		EMD62160
		EMD65613
		EMD68543
		EMD64391
		EMD61207
		EMD58742
		EMD69037
		EMD64903
		EMD67319
		EMD58728
		EMD65849
		EMD64635
		EMD58731
		EMD68764
		EMD61056
		EMD59805
		EMD65792
		EMD67719
		EMD62774
		EMD61733
		EMD68064
		EMD63458
		EMD66112
		EMD62181
		EMD58335
		EMD68114
		EMD58146
		EMD60317
		EMD59728
		EMD62201
		EMD64451
		EMD68685
		EMD69861
		EMD65076
		EMD64229
		EMD59250
		EMD59560
		EMD68791
		EMD65746
		EMD66556
		EMD61871
		EMD63786
		EMD65901
		EMD58150
		EMD58991
		EMD69785
		EMD65780
		EMD58746
		EMD64479
