# Supplementary material for: Transcriptome analysis of Bipolaris sorokiniana - Hordeum vulgare provides insights into mechanisms of host-pathogen interaction
Source: Front Microbiol. 2024 Mar 20;15:1360571. doi: 10.3389/fmicb.2024.1360571 (PMC10993733; doi:10.3389/fmicb.2024.1360571)
Supplement: Supplementary file 4 [file Table_4.XLSX]

## Sheet: BS_RI CC
GO_Category in Resistant host background	NumberofGenes	NumberofGenes%	GOID	GO-Term
Cellular Component	17	13.3	GO:0005622	intracellular
Cellular Component	2	1.6	GO:0005886	plasma membrane
Cellular Component	1	0.8	GO:0012505	endomembrane system
Cellular Component	12	9.4	GO:0031224	intrinsic to membrane
Cellular Component	1	0.8	GO:0031975	envelope
Cellular Component	2	1.6	GO:0031982	vesicle
Cellular Component	16	12.5	GO:0043227	membrane-bounded organelle
Cellular Component	1	0.8	GO:0043228	non-membrane-bounded organelle
Cellular Component	17	13.3	GO:0043229	intracellular organelle
Cellular Component	1	0.8	GO:0043233	organelle lumen
Cellular Component	2	1.6	GO:0044422	organelle part
Cellular Component	17	13.3	GO:0044424	intracellular part
Cellular Component	12	9.4	GO:0044425	membrane part
Cellular Component	2	1.6	GO:0044446	intracellular organelle part
Cellular Component	18	14.1	GO:0044464	cell part
Cellular Component	2	1.6	GO:0071944	cell periphery

## Sheet: BS_RI BP
GO_Category in Resistant host background	NumberofGenes	NumberofGenes%	GOID	GO-Term
Biological Process	1	0.8	GO:0044085	cellular component biogenesis
Biological Process	3	2.3	GO:0016043	cellular component organization
Biological Process	1	0.8	GO:0016265	death
Biological Process	17	13.3	GO:0044763	single-organism cellular process
Biological Process	9	7	GO:0006807	nitrogen compound metabolic process
Biological Process	1	0.8	GO:0009058	biosynthetic process
Biological Process	18	14.1	GO:0044238	primary metabolic process
Biological Process	11	8.6	GO:0044237	cellular metabolic process
Biological Process	19	14.8	GO:0071704	organic substance metabolic process
Biological Process	1	0.8	GO:0051641	cellular localization
Biological Process	14	10.9	GO:0051234	establishment of localization
Biological Process	1	0.8	GO:0071554	cell wall organization or biogenesis
Biological Process	1	0.8	GO:0045184	establishment of protein localization
Biological Process	14	10.9	GO:0006810	transport
Biological Process	2	1.6	GO:0050789	regulation of biological process
Biological Process	1	0.8	GO:0051649	establishment of localization in cell
Biological Process	8	6.3	GO:0044710	single-organism metabolic process
Biological Process	1	0.8	GO:0033036	macromolecule localization
Biological Process	1	0.8	GO:0009056	catabolic process
Biological Process	13	10.2	GO:0044765	single-organism transport

## Sheet: BS_RI MF
GO_Category in Resistant host background	NumberofGenes	NumberofGenes%	GOID	GO-Term
Molecular Function	11	8.6	GO:1901363	heterocyclic compound binding
Molecular Function	11	8.6	GO:0097159	organic cyclic compound binding
Molecular Function	1	0.8	GO:0097367	carbohydrate derivative binding
Molecular Function	4	3.1	GO:0016853	isomerase activity
Molecular Function	4	3.1	GO:0043167	ion binding
Molecular Function	4	3.1	GO:0016874	ligase activity
Molecular Function	2	1.6	GO:0016829	lyase activity
Molecular Function	10	7.8	GO:0016787	hydrolase activity
Molecular Function	1	0.8	GO:0005515	protein binding
Molecular Function	13	10.2	GO:0016740	transferase activity
Molecular Function	1	0.8	GO:0003700	sequence-specific DNA binding transcription factor activity
Molecular Function	16	12.5	GO:0016491	oxidoreductase activity

## Sheet: BS_SI CC
GO_Category in Susceptible host background	NumberofGenes	NumberofGenes%	GOID	GO-Term
Cellular Component	34	16.6	GO:0005622	intracellular
Cellular Component	4	2	GO:0005789	endoplasmic reticulum membrane
Cellular Component	5	2.4	GO:0005886	plasma membrane
Cellular Component	5	2.4	GO:0012505	endomembrane system
Cellular Component	1	0.5	GO:0016469	proton-transporting two-sector ATPase complex
Cellular Component	4	2	GO:0030529	ribonucleoprotein complex
Cellular Component	9	4.4	GO:0031090	organelle membrane
Cellular Component	61	29.8	GO:0031224	intrinsic to membrane
Cellular Component	2	1	GO:0031975	envelope
Cellular Component	1	0.5	GO:0031982	vesicle
Cellular Component	1	0.5	GO:0033178	proton-transporting two-sector ATPase complex, catalytic domain
Cellular Component	4	2	GO:0042175	nuclear outer membrane-endoplasmic reticulum membrane network
Cellular Component	28	13.7	GO:0043227	membrane-bounded organelle
Cellular Component	5	2.4	GO:0043228	non-membrane-bounded organelle
Cellular Component	32	15.6	GO:0043229	intracellular organelle
Cellular Component	3	1.5	GO:0043233	organelle lumen
Cellular Component	4	2	GO:0043234	protein complex
Cellular Component	16	7.8	GO:0044422	organelle part
Cellular Component	34	16.6	GO:0044424	intracellular part
Cellular Component	62	30.2	GO:0044425	membrane part
Cellular Component	16	7.8	GO:0044446	intracellular organelle part
Cellular Component	36	17.6	GO:0044464	cell part
Cellular Component	1	0.5	GO:0046930	pore complex
Cellular Component	1	0.5	GO:0070469	respiratory chain
Cellular Component	5	2.4	GO:0071944	cell periphery

## Sheet: BS_SI BP
GO_Category in Susceptible host background	NumberofGenes	NumberofGenes%	GOID	GO-Term
Biological Process	8	3.9	GO:0044700	single organism signaling
Biological Process	3	1.5	GO:0044085	cellular component biogenesis
Biological Process	10	4.9	GO:0051716	cellular response to stimulus
Biological Process	4	2	GO:0016043	cellular component organization
Biological Process	3	1.5	GO:0065008	regulation of biological quality
Biological Process	1	0.5	GO:0016265	death
Biological Process	6	2.9	GO:0006950	response to stress
Biological Process	2	1	GO:0009628	response to abiotic stimulus
Biological Process	31	15.1	GO:0044763	single-organism cellular process
Biological Process	19	9.3	GO:0006807	nitrogen compound metabolic process
Biological Process	22	10.7	GO:0009058	biosynthetic process
Biological Process	45	22	GO:0044238	primary metabolic process
Biological Process	43	21	GO:0044237	cellular metabolic process
Biological Process	2	1	GO:0032259	methylation
Biological Process	19	9.3	GO:0051234	establishment of localization
Biological Process	48	23.4	GO:0071704	organic substance metabolic process
Biological Process	1	0.5	GO:0051641	cellular localization
Biological Process	19	9.3	GO:0006810	transport
Biological Process	1	0.5	GO:0045184	establishment of protein localization
Biological Process	2	1	GO:0071554	cell wall organization or biogenesis
Biological Process	2	1	GO:0009605	response to external stimulus
Biological Process	19	9.3	GO:0050789	regulation of biological process
Biological Process	1	0.5	GO:0051649	establishment of localization in cell
Biological Process	4	2	GO:0042221	response to chemical stimulus
Biological Process	20	9.8	GO:0044710	single-organism metabolic process
Biological Process	2	1	GO:0051606	detection of stimulus
Biological Process	1	0.5	GO:0065009	regulation of molecular function
Biological Process	1	0.5	GO:0033036	macromolecule localization
Biological Process	11	5.4	GO:0009056	catabolic process
Biological Process	18	8.8	GO:0044765	single-organism transport

## Sheet: BS_SI MF
GO_Category in Susceptible host background	NumberofGenes	NumberofGenes%	GOID	GO-Term
Molecular Function	3	1.5	GO:0038023	signaling receptor activity
Molecular Function	2	1	GO:0019825	oxygen binding
Molecular Function	1	0.5	GO:0060589	nucleoside-triphosphatase regulator activity
Molecular Function	45	22	GO:0043167	ion binding
Molecular Function	7	3.4	GO:0016874	ligase activity
Molecular Function	5	2.4	GO:0022892	substrate-specific transporter activity
Molecular Function	4	2	GO:0016829	lyase activity
Molecular Function	5	2.4	GO:0005515	protein binding
Molecular Function	22	10.7	GO:0016787	hydrolase activity
Molecular Function	1	0.5	GO:0003682	chromatin binding
Molecular Function	2	1	GO:0033218	amide binding
Molecular Function	1	0.5	GO:0004857	enzyme inhibitor activity
Molecular Function	3	1.5	GO:0004871	signal transducer activity
Molecular Function	2	1	GO:0003735	structural constituent of ribosome
Molecular Function	5	2.4	GO:0048037	cofactor binding
Molecular Function	1	0.5	GO:1901681	sulfur compound binding
Molecular Function	5	2.4	GO:0003700	sequence-specific DNA binding transcription factor activity
Molecular Function	1	0.5	GO:0051184	cofactor transporter activity
Molecular Function	24	11.7	GO:0016491	oxidoreductase activity
Molecular Function	49	23.9	GO:0097159	organic cyclic compound binding
Molecular Function	49	23.9	GO:1901363	heterocyclic compound binding
Molecular Function	3	1.5	GO:0016853	isomerase activity
Molecular Function	2	1	GO:0030246	carbohydrate binding
Molecular Function	1	0.5	GO:0004601	peroxidase activity
Molecular Function	1	0.5	GO:0001871	pattern binding
Molecular Function	23	11.2	GO:0016740	transferase activity
Molecular Function	13	6.3	GO:0022857	transmembrane transporter activity
Molecular Function	18	8.8	GO:0036094	small molecule binding

## Sheet: KEGG RESISTANT
KEGG pathways in Resistant host background	No of genes
Metabolic pathways	8
Biosynthesis of secondary metabolites	4
Biosynthesis of nucleotide sugars	2
Galactose metabolism	2
Amino sugar and nucleotide sugar metabolism	2
Glycolysis_Gluconeogenesis	2
Microbial metabolism in diverse environments	2
Pentose phosphate pathway	2
ABC transporters	1
Basal transcription factors	1
Endocytosis	1
Lysosome	1
Bacterial invasion of epithelial cells	1
Biosynthesis of cofactors	1
Tryptophan metabolism	1
O-Antigen nucleotide sugar biosynthesis	1
Glycerophospholipid metabolism	1
Starch and sucrose metabolism	1
Purine metabolism	1
Streptomycin biosynthesis	1
Tyrosine metabolism	1
Isoquinoline alkaloid biosynthesis	1
Betalain biosynthesis	1
Cysteine and methionine metabolism	1
Carbon fixation in photosynthetic organisms	1
Spliceosome	1
Ubiquitin mediated proteolysis	1

## Sheet: KEGG SUSCEPTIBLE
Kegg Pathways in Susceptible host background	No of genes
Metabolic pathways	18
Biosynthesis of secondary metabolites	10
ABC transporters	3
Ubiquitin mediated proteolysis	3
Microbial metabolism in diverse environments	2
Starch and sucrose metabolism	2
Ribosome	2
Aminoacyl-tRNA biosynthesis	1
Apoptosis	1
Amyotrophic lateral sclerosis	1
Lipid and atherosclerosis	1
Axon regeneration	1
Basal transcription factors	1
Endocytosis	1
Biosynthesis of cofactors	1
Tryptophan metabolism	1
Biosynthesis of nucleotide sugars	1
Galactose metabolism	1
Amino sugar and nucleotide sugar metabolism	1
O-Antigen nucleotide sugar biosynthesis	1
Glycerophospholipid metabolism	1
Glycolysis_Gluconeogenesis	1
Inositol phosphate metabolism	1
Streptomycin biosynthesis	1
Biosynthesis of amino acids	1
Lysine biosynthesis	1
Monobactam biosynthesis	1
Tyrosine metabolism	1
Isoquinoline alkaloid biosynthesis	1
Betalain biosynthesis	1
Cysteine and methionine metabolism	1
Glyoxylate and dicarboxylate metabolism	1
Arginine and proline metabolism	1
Pentose phosphate pathway	1
Carbon fixation in photosynthetic organisms	1
Nucleotide metabolism	1
Purine metabolism	1
Oxidative phosphorylation	1
Nucleocytoplasmic transport	1
p53 signaling pathway	1
