# Supplementary material for: Transcriptome analysis of Bipolaris sorokiniana - Hordeum vulgare provides insights into mechanisms of host-pathogen interaction
Source: Front Microbiol. 2024 Mar 20;15:1360571. doi: 10.3389/fmicb.2024.1360571 (PMC10993733; doi:10.3389/fmicb.2024.1360571)
Supplement: Supplementary file 5 [file Table_5.XLSX]

## Sheet: BS_SI Effectors
Candidate effectors of B.sorokinina in Susceptible host background
#Identifier	Cytoplasmic effector	Apoplastic effector	Non-effector	Prediction
EMD69701	-	Y (0.68)	-	Apoplastic effector
EMD68979	-	-	Y (0.513)	Non-effector
EMD69284	Y (0.624)	-	-	Cytoplasmic effector
EMD69902	-	-	Y (0.674)	Non-effector
EMD69264	-	Y (0.848)	-	Apoplastic effector
EMD69723	-	-	Y (0.696)	Non-effector
EMD68711	-	-	Y (0.672)	Non-effector
EMD68702	-	-	Y (0.765)	Non-effector
EMD68134	-	-	Y (0.805)	Non-effector
EMD66956	-	-	Y (0.713)	Non-effector
EMD66954	-	-	Y (0.666)	Non-effector
EMD66829	-	Y (0.752)	-	Apoplastic effector
EMD66152	-	-	Y (0.513)	Non-effector
EMD66725	-	Y (0.698)	-	Apoplastic effector
EMD66509	-	-	Y (0.792)	Non-effector
EMD64635	Y (0.564)	Y (0.798)	-	Apoplastic/cytoplasmic effector
EMD64479	Y (0.574)	Y (0.513)	-	Cytoplasmic/apoplastic effector
EMD63848	-	Y (0.621)	-	Apoplastic effector
EMD63454	-	Y (0.52)	-	Apoplastic effector
EMD63612	-	Y (0.519)	-	Apoplastic effector
EMD63611	-	-	Y (0.738)	Non-effector
EMD62743	Y (0.743)	Y (0.828)	-	Apoplastic/cytoplasmic effector
EMD62506	-	-	Y (0.855)	Non-effector
EMD62181	-	-	Y (0.821)	Non-effector
EMD60725	Y (0.523)	-	-	Cytoplasmic effector
EMD60043	-	Y (0.563)	-	Apoplastic effector
EMD59947	-	Y (0.659)	-	Apoplastic effector
EMD60007	-	-	Y (0.76)	Non-effector
EMD59560	-	-	Y (0.508)	Non-effector
EMD59748	-	-	Y (0.858)	Non-effector

## Sheet: List of effector genes BS_SI
genes	BS.1	BS.2	SI.1	SI.2	normalised_count	normalised_count_BS	normalised_count_SI	foldChange	log2FoldChange	pval	padj	Description	Length	#Hits	e-Value	sim mean	#GO	GO IDs	GO Names	Enzyme Codes	Enzyme Names	InterPro IDs	InterPro GO IDs	InterPro GO Names	Cross-reference (KO)	KEGG-pathways
EMD69701	458.309	426.146	16.6989	15.4568	229.153	442.228	16.0779	0.0363566	-4.78164	0.0465181	1	glycoside hydrolase family 16 protein	1365	20	0	91.46	2	F:GO:0004553; P:GO:0005975	F:hydrolase activity, hydrolyzing O-glycosyl compounds; P:carbohydrate metabolic process	EC:3.2; EC:3; EC:3.2.1	Glycosylases; Hydrolases; Glycosylases	-	-	-	-	-
EMD69284	343.759	327.509	8.34947	0	169.904	335.634	4.17474	0.0124384	-6.32906	0.0148854	1	FAS1 domain-containing protein	1356	20	0	87.53	-	-	-	-	-	-	-	-	-	-
EMD69264	306.15	339.151	0	0	161.325	322.651	0	0	#NAME?	0.00560264	1	NAC-domain-containing protein	690	20	1.58378E-128	81.5	2	C:GO:0005634; C:GO:0005737	C:nucleus; C:cytoplasm	-	-	-	-	-	-	-
EMD66829	213.044	202.519	0	0	103.891	207.781	0	0	#NAME?	0.00941364	1	c4-dicarboxylate transporter malic acid transport protein	579	20	7.02085E-126	86.38	-	-	-	-	-	-	-	-	-	-
EMD66725	91.8127	95.95	0	0	46.9407	93.8814	0	0	#NAME?	0.0334559	1	atp-dependent rna helicase dbp9	732	20	5.4524E-179	85.29	4	F:GO:0003676; F:GO:0003724; F:GO:0005524; F:GO:0016787	F:nucleic acid binding; F:RNA helicase activity; F:ATP binding; F:hydrolase activity	EC:3.6.4.13; EC:3	RNA helicase; Hydrolases	-	-	-	-	-
EMD64635	263.369	279.023	0	0	135.598	271.196	0	0	#NAME?	0.00672492	1	antigenic thaumatin-like protein	855	20	4.85662E-164	77.42	-	-	-	-	-	-	-	-	-	-
EMD64479	89.1187	105.545	0	0	48.6659	97.3319	0	0	#NAME?	0.031418	1	uncharacterized protein COCSADRAFT_37061	1089	20	0	82.73	-	-	-	-	-	-	-	-	-	-
EMD63848	136.103	145.972	0	0	70.5187	141.037	0	0	#NAME?	0.016871	1	uncharacterized protein COCSADRAFT_37598	1215	12	0	72.46	-	-	-	-	-	-	-	-	-	-
EMD63454	169.509	185.631	0	7.72841	90.7171	177.57	3.86421	0.0217616	-5.52207	0.0331977	1	uncharacterized protein COCSADRAFT_37239	1905	20	0	85.61	-	-	-	-	-	-	-	-	-	-
EMD63612	307.874	308.703	0	0	154.144	308.289	0	0	#NAME?	0.00585918	1	Asp f 13-like protein	417	20	1.91921E-95	87.84	1	C:GO:0005576	C:extracellular region	-	-	-	-	-	-	-
EMD62743	321.56	296.422	0	0	154.495	308.991	0	0	#NAME?	0.00584563	1	victoriocin	552	20	8.98659E-100	64.4	-	-	-	-	-	-	-	-	-	-
EMD60725	190.845	259.193	0	0	112.51	225.019	0	0	#NAME?	0.00845748	1	putative ricin b lectin protein	510	20	1.31269E-121	95.37	4	P:GO:0006508; F:GO:0008237; F:GO:0016874; F:GO:0030246	P:proteolysis; F:metallopeptidase activity; F:ligase activity; F:carbohydrate binding	EC:3.4; EC:3; EC:6	Acting on peptide bonds (peptidases); Hydrolases; Ligases	-	-	-	-	-
EMD60043	374.363	518.514	0	30.9137	230.948	446.439	15.4568	0.0346225	-4.85215	0.0462146	1	gpi anchored serine-threonine rich protein	510	20	7.26489E-48	94.12	-	-	-	-	-	-	-	-	-	-
EMD59947	88.2566	95.1824	0	0	45.8598	91.7195	0	0	#NAME?	0.0348468	1	Acetyl-CoA synthetase-like protein	759	20	2.75751E-147	75.02	-	-	-	-	-	-	-	-	-	-

## Sheet: BS_RI Effectors
Candidate effectors of B.sorokinina in Resistant host background
#Identifier	Cytoplasmic effector	Apoplastic effector	Non-effector	Prediction
EMD69701	-	Y (0.68)	-	Apoplastic effector
EMD68979	-	-	Y (0.513)	Non-effector
EMD69284	Y (0.624)	-	-	Cytoplasmic effector
EMD69264	-	Y (0.848)	-	Apoplastic effector
EMD66956	-	-	Y (0.713)	Non-effector
EMD66954	-	-	Y (0.666)	Non-effector
EMD66829	-	Y (0.752)	-	Apoplastic effector
EMD66754	-	Y (0.539)	-	Apoplastic effector
EMD66509	-	-	Y (0.792)	Non-effector
EMD65481	-	-	Y (0.85)	Non-effector
EMD63848	-	Y (0.621)	-	Apoplastic effector
EMD63454	-	Y (0.52)	-	Apoplastic effector
EMD63612	-	Y (0.519)	-	Apoplastic effector
EMD63611	-	-	Y (0.738)	Non-effector
EMD63040	-	-	Y (0.914)	Non-effector
EMD62743	Y (0.743)	Y (0.828)	-	Apoplastic/cytoplasmic effector
EMD60725	Y (0.523)	-	-	Cytoplasmic effector
EMD60043	-	Y (0.563)	-	Apoplastic effector
EMD60007	-	-	Y (0.76)	Non-effector
EMD59830	-	-	Y (0.973)	Non-effector
EMD58636	-	-	Y (0.848)	Non-effector
EMD58494	-	-	Y (0.523)	Non-effector

## Sheet: List of effector genes BS_RI
genes	BS.1	BS.2	RI.1	RI.2	normalised_count	normalised_count_BS	normalised_count_RI	foldChange	log2FoldChange	pval	padj	Description	Length	#Hits	e-Value	sim mean	#GO	GO IDs	GO Names	Enzyme Codes	Enzyme Names	InterPro IDs	InterPro GO IDs	InterPro GO Names	Cross-reference (KO)	KEGG-pathways
EMD69701	394.957	388.476	16.6368	0	200.018	391.717	8.31838	0.0212357	-5.55737	0.0276414	1	glycoside hydrolase family 16 protein	1365	20	0	91.46	2	P:GO:0005975; F:GO:0016787	P:carbohydrate metabolic process; F:hydrolase activity	EC:3.2; EC:3; EC:3.2.1	Glycosylases; Hydrolases; Glycosylases	-	-	-	-	-
EMD69284	296.241	298.559	0	0	148.7	297.4	0	0	#NAME?	0.00778877	1	FAS1 domain-containing protein	1356	20	0	87.53	-	-	-	-	-	-	-	-	-	-
EMD69264	263.831	309.171	0	0	143.251	286.501	0	0	#NAME?	0.00821191	1	NAC-domain-containing protein	690	20	1.58348E-128	81.5	1	C:GO:0005634	C:nucleus	-	-	-	-	-	-	-
EMD66829	183.595	184.617	0	0	92.053	184.106	0	0	#NAME?	0.0162899	1	c4-dicarboxylate transporter malic acid transport protein	579	20	7.01897E-126	86.38	-	-	-	-	-	-	-	-	-	-
EMD66754	182.945	177.269	0	0	90.0536	180.107	0	0	#NAME?	0.0168908	1	nad mitochondrial precursor	1440	20	0	86.55	-	-	-	-	-	-	-	-	-	-
EMD63848	117.289	133.069	0	0	62.5894	125.179	0	0	#NAME?	0.0312921	1	uncharacterized protein COCSADRAFT_37598	1215	12	0	72.46	-	-	-	-	-	-	-	-	-	-
EMD63454	146.078	169.222	0	0	78.8249	157.65	0	0	#NAME?	0.0211068	1	uncharacterized protein COCSADRAFT_37239	1905	20	0	85.61	-	-	-	-	-	-	-	-	-	-
EMD63612	265.317	281.415	0	0	136.683	273.366	0	0	#NAME?	0.008787	1	Asp f 13-like protein	417	20	1.91869E-95	87.84	1	C:GO:0005576	C:extracellular region	-	-	-	-	-	-	-
EMD62743	277.111	270.219	0	10.4216	139.438	273.665	5.21082	0.0190409	-5.71476	0.024094	1	victoriocin	552	20	8.98491E-100	64.4	-	-	-	-	-	-	-	-	-	-
EMD60725	164.465	236.281	0	0	100.187	200.373	0	0	#NAME?	0.0141894	1	putative ricin b lectin protein	510	20	1.31244E-121	95.37	3	F:GO:0016787; F:GO:0016874; F:GO:0140096	F:hydrolase activity; F:ligase activity; F:catalytic activity, acting on a protein	EC:3.4; EC:3; EC:6	Acting on peptide bonds (peptidases); Hydrolases; Ligases	-	-	-	-	-
EMD60043	322.615	472.679	0	20.8433	204.034	397.647	10.4216	0.0262083	-5.25383	0.0269528	1	gpi anchored serine-threonine rich protein	510	20	7.26295E-48	94.12	-	-	-	-	-	-	-	-	-	-
